# Supplementary material
Source: publisher figshare collection journal article supplement (https://acs.figshare.com/ndownloader/files/20417958)
Supplement: Supplementary file 1 [file 20417958]

## SUPPORTING INFORMATION

### Synthesis and pharmacological characterization of conformationally restricted retigabine analogues as novel neuronal Kv7 channels activators

*Carmine Ostacolo,<sup>†,‡</sup> Francesco Miceli,<sup>†,‡</sup> Veronica Di Sarno,<sup>‡,‡</sup> Piera Nappi,<sup>¶</sup> Nunzio Iraci,<sup>‡</sup> Maria Virginia Soldovieri,<sup>§</sup> Tania Ciaglia,<sup>‡</sup> Paolo Ambrosino,<sup>¥</sup> Vincenzo Vestuto,<sup>‡</sup> Anna Lauritano,<sup>¶</sup> Simona Musella,<sup>⊥</sup> Giacomo Pepe,<sup>‡</sup> Manuela G. Basilicata,<sup>‡</sup> Michele Manfra,<sup>†</sup> Diego Romano Perinelli,<sup>□</sup> Ettore Novellino,<sup>‡</sup> Alessia Bertamino,<sup>‡</sup> Isabel M. Gomez-Monterrey,<sup>‡</sup> Pietro Campiglia,<sup>‡,\*</sup> Maurizio Taglialatela,<sup>¶,\*</sup>*

<sup>†</sup> Department of Pharmacy, University Federico II of Naples, Via D. Montesano 49, 80131, Naples, Italy

<sup>¶</sup> Department of Neuroscience, Reproductive Sciences and Dentistry, University Federico II of Naples, Via Pansini, 5, 80131, Naples, Italy

<sup>‡</sup> Department of Pharmacy, University of Salerno, Via G. Paolo II 132, 84084, Fisciano, Salerno, Italy

<sup>§</sup> Department of Medicine and Health Science V. Tiberio, University of Molise, Via F. de Sanctis, 86100, Campobasso, Italy

<sup>¥</sup> Department of Science and Technology (DST), University of Sannio, Via Port'Arsa 11, 82100, Benevento Italy;

<sup>†</sup> Department of Science, University of Basilicata, Via dell'Ateneo Lucano 10, 85100 Potenza, Italy

<sup>□</sup> School of Pharmacy, University of Camerino, Via Gentile III da Varano, 62032, Camerino (MC), Italy

<sup>⊥</sup> European Biomedical Research Center (EBRIS), Via Salvatore de Renzi, 3, 84125 Salerno (SA), Italy

#### Table of content:

#### 1. Supplementary schemes and figures:

|                                                                                                                                                                                                                                                                                 |              |
|---------------------------------------------------------------------------------------------------------------------------------------------------------------------------------------------------------------------------------------------------------------------------------|--------------|
| <b>Figure S1.</b> Relative potential energies for the rotation of the bond connecting the hydrogen bond donor group to the hydrogen bond acceptor .....                                                                                                                         | <b>S2</b>    |
| <b>Table S1.</b> Relative electrostatic potential and relative electron densities surfaces of the linker moieties N-X.....                                                                                                                                                      | <b>S3</b>    |
| <b>Table S2:</b> Effect of tested compounds on ramp-evoked currents of Kv 7.2.....                                                                                                                                                                                              | <b>S4-S9</b> |
| <b>Figure S2.</b> Fluorescence Intensity ratio for <b>23a</b> , <b>24a</b> and retigabine using pyrene as fluorescent probe.....                                                                                                                                                | <b>S10</b>   |
| <b>Figure S3.</b> Effect of retigabine and <b>23a</b> on Kv7.1 channels.....                                                                                                                                                                                                    | <b>S11</b>   |
| <b>Figure S4.</b> Superimposition of models B and C .....                                                                                                                                                                                                                       | <b>S11</b>   |
| <b>Table S3.</b> Training sets of models A, B and C. Active compounds are typed in green, while inactive ones are in red.....                                                                                                                                                   | <b>S12</b>   |
| <b>Figure S5.</b> UHPLC profile of a retigabine batch after 6h visible light irradiation.....                                                                                                                                                                                   | <b>S13</b>   |
| <b>Figure S6.</b> Full scan profile, MS/MS profile and predicted structure of retigabine photooxidative byproduct.....                                                                                                                                                          | <b>S14</b>   |
| <b>Figure S7.</b> Retigabine GC profile and full scan mass spectra of the main peak.....                                                                                                                                                                                        | <b>S15</b>   |
| <b>Figure S8.</b> Overlapping HPLC traces of a 4-fluorobenzaldehyde and a retigabine batch....                                                                                                                                                                                  | <b>S16</b>   |
| <b>Figure S9.</b> MS/MS profile for unknown compound <b>#1</b> and putative molecular structures..                                                                                                                                                                              | <b>S17</b>   |
| <b>Figure S10.</b> HPLC, GC and MS (C) profile for compound <b>8a</b> after the photodegradation...                                                                                                                                                                             | <b>S18</b>   |
| <b>Figure S11.</b> Blank RP-HPLC trace of the method used for purity determination of compounds <b>4a-b</b> , <b>5a-b</b> , <b>6-7</b> , <b>8a-i</b> , <b>9a-c</b> , <b>13a-g</b> , <b>16a-b</b> , <b>19</b> , <b>23a-d</b> , <b>24a-b</b> , <b>25a-29a</b> and <b>34</b> ..... | <b>S19</b>   |
| <b>Figure S12.</b> Blank RP-HPLC trace for the analytical method used for purity determination of compounds <b>33a</b> and <b>33b</b> . ....                                                                                                                                    | <b>S20</b>   |

|                                                                     |                 |
|---------------------------------------------------------------------|-----------------|
| <b>2. NMR spectra and HPLC traces of synthesized compounds.....</b> | <b>S21-S152</b> |
|---------------------------------------------------------------------|-----------------|

## 1. Supplementary schemes and figures:

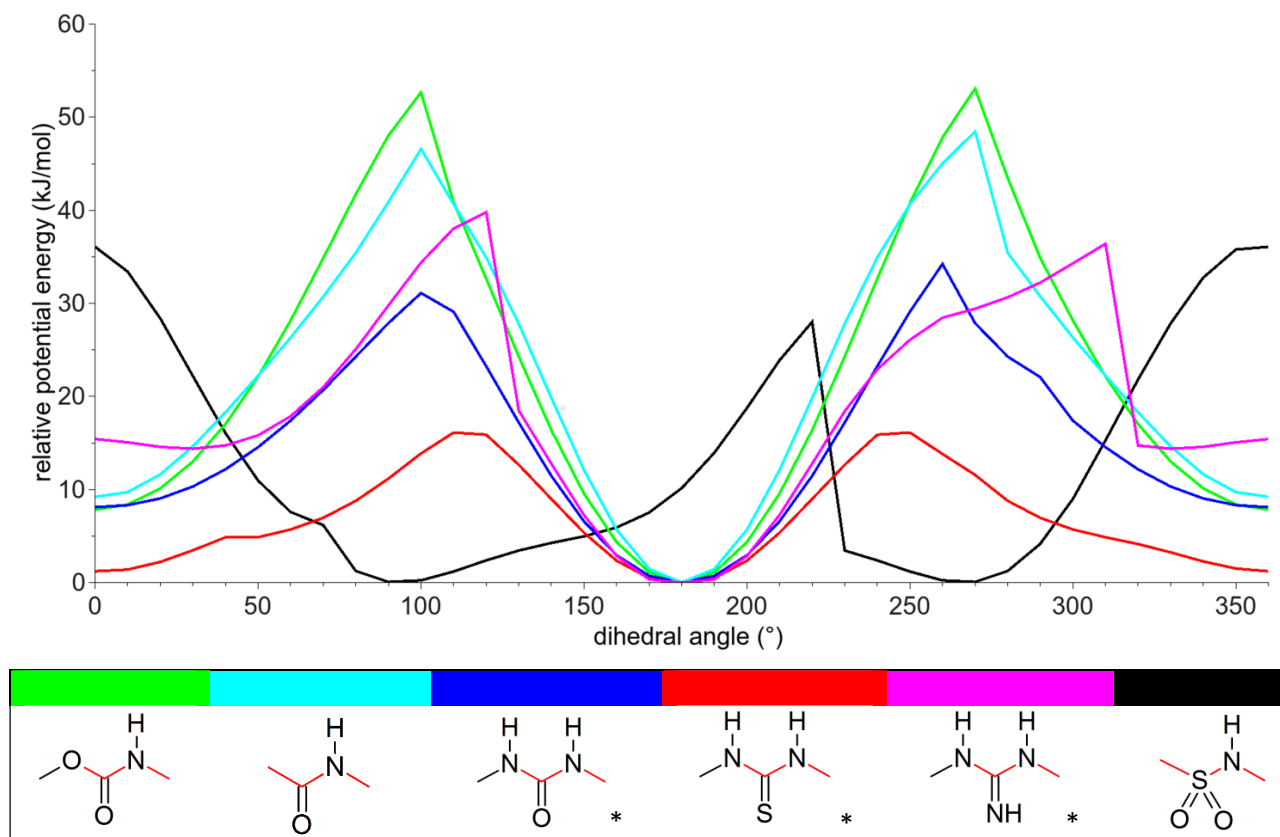

**Figure S1.** Relative potential energies for the rotation of the bond connecting the hydrogen bond donor group to the hydrogen bond acceptor one, according to the OPLS3 forcefield. Scanned dihedral angles are red-highlighted in the legend. \*For these molecules, due to the presence of a second NH group, a two-coordinate scan was employed. (see materials and methods)

| Linker moiety                                                                       | Electrostatic potentials <sup>a</sup>                                               | Electron densities <sup>b</sup>                                                       |
|-------------------------------------------------------------------------------------|-------------------------------------------------------------------------------------|---------------------------------------------------------------------------------------|
| 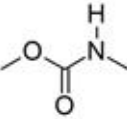   |    |    |
|    |    |    |
|    |    |    |
|   |   |   |
|  |  |  |
|  |  |  |

**Table S1.** Linker moieties connecting the 5-amino group to R1 group. <sup>a</sup>Relative electrostatic potential surfaces. Relative potentials are color coded by a red-white-blue color ramp, from the most negative to the most positive value. <sup>b</sup>Relative electron densities surfaces. Relative densities are color coded by a red-white-blue color ramp, from to lowest to the highest electron density.

**Table S2:** Effect of tested compounds on ramp-evoked currents of Kv 7.2

| NAME              | STRUCTURE                                                                           | $I_{drug}/I_{ctl}$ at -40 mV | $I_{drug}/I_{ctl}$ at 0 mV | N  |
|-------------------|-------------------------------------------------------------------------------------|------------------------------|----------------------------|----|
| Flupirtine        | 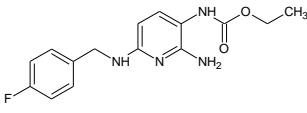   | 2.47±0.23                    | 1.24±0.08                  | 5  |
| ICA27243          |    | 8.97±0.89                    | 2.84±0.34                  | 5  |
| Retigabine (1 µM) |    | 3.96±0.51                    | 1.82±0.16                  | 11 |
| Flupirtine        |    | 2.47±0.23                    | 1.24±0.08                  | 5  |
| Retigabine        |   | 6.20±1.03                    | 1.95±0.12                  | 38 |
| 4a                |  | 2.01±0.58                    | 1.26±0.13                  | 6  |
| 4b                |  | 0.80±0.14                    | 0.48±0.07                  | 5  |
| 5a                |  | 3.31±0.61                    | 1.40±0.08                  | 6  |
| 5b                |  | 0.91±0.21                    | 0.81±0.11                  | 5  |
| 6                 |  | 1.77±0.77                    | 1.04±0.24                  | 3  |
| 7                 |  | 0.98±0.09                    | 0.84±0.09                  | 3  |



**Table S2:** continue

|           |                                                                                     |           |           |   |
|-----------|-------------------------------------------------------------------------------------|-----------|-----------|---|
| <b>8a</b> | 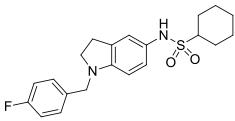   | 6.41±0.93 | 2.81±0.26 | 9 |
| <b>8b</b> |    | 1.15±0.28 | 0.64±0.14 | 3 |
| <b>8c</b> |    | 2.03±0.19 | 1.55±0.12 | 5 |
| <b>8d</b> |    | 2.55±0.79 | 1.93±0.32 | 5 |
| <b>8e</b> |  | 2.48±0.20 | 2.18±0.09 | 3 |
| <b>8f</b> |  | 1.12±0.05 | 0.99±0.06 | 3 |
| <b>8g</b> |  | 1.49±0.28 | 1.16±0.07 | 5 |
| <b>8h</b> |  | 0.89±0.12 | 0.98±0.11 | 5 |

**Table S2:** continue

|            |                                                                                     |           |           |   |
|------------|-------------------------------------------------------------------------------------|-----------|-----------|---|
| <b>8i</b>  | 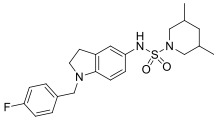   | 1.91±0.44 | 1.87±0.22 | 5 |
| <b>9a</b>  |    | 1.88±0.14 | 1.64±0.20 | 4 |
| <b>9b</b>  |    | 1.32±0.21 | 0.66±0.07 | 5 |
| <b>9c</b>  |   | 2.37±0.40 | 1.71±0.12 | 4 |
| <b>13a</b> |  | 5.82±1.38 | 3.79±1.09 | 3 |
| <b>13b</b> |  | 4.56±1.11 | 2.11±0.18 | 3 |
| <b>13c</b> |  | 3.62±0.20 | 2.37±0.58 | 3 |

**Table S2:** continue

|            |                                                                                     |           |           |   |
|------------|-------------------------------------------------------------------------------------|-----------|-----------|---|
| <b>13d</b> | 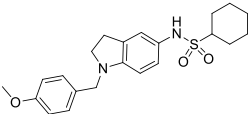   | 6.43±1.51 | 4.24±0.83 | 3 |
| <b>13e</b> |    | 1.53±0.39 | 1.22±0.11 | 5 |
| <b>13f</b> |    | 1.13±0.15 | 0.92±0.13 | 3 |
| <b>13g</b> |  | 7.27±1.32 | 3.09±0.52 | 4 |
| <b>16a</b> |  | 1.85±0.30 | 1.22±0.07 | 4 |
| <b>16b</b> |  | 1.45±0.08 | 1.18±0.08 | 3 |
| <b>19</b>  |  | 3.24±1.52 | 1.37±0.17 | 4 |

**Table S2:** continue

|            |                                                                                     |           |           |   |
|------------|-------------------------------------------------------------------------------------|-----------|-----------|---|
| <b>23a</b> | 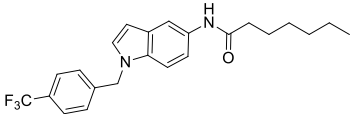   | 9.34±0.82 | 3.24±0.18 | 5 |
| <b>23b</b> |    | 6.31±1.89 | 2.20±0.12 | 4 |
| <b>23c</b> |    | 4.71±1.31 | 2.76±0.19 | 7 |
| <b>23d</b> |  | 2.00±0.36 | 1.63±0.06 | 4 |
| <b>24a</b> |  | 8.23±1.36 | 3.54±0.88 | 3 |
| <b>24b</b> |  | 4.50±1.20 | 2.72±0.92 | 4 |
| <b>25a</b> |  | 1.29±0.18 | 1.02±0.05 | 3 |

**Table S2:** continue

|            |                                                                                     |           |           |   |
|------------|-------------------------------------------------------------------------------------|-----------|-----------|---|
| <b>26a</b> | 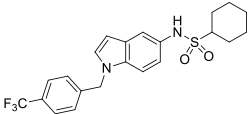   | 2.27±0.49 | 1.93±0.19 | 3 |
| <b>27a</b> |    | 0.94±0.16 | 0.8±0.13  | 3 |
| <b>28a</b> |    | 1.31±0.22 | 1.10±0.04 | 4 |
| <b>29a</b> |  | 1.60±0.30 | 1.30±0.11 | 4 |
| <b>33a</b> |  | 1.90±0.40 | 1.43±0.16 | 3 |
| <b>33b</b> |  | 1.34±0.47 | 0.95±0.15 | 3 |
| <b>34</b>  |  | 1.67±0.18 | 1.04±0.05 | 3 |

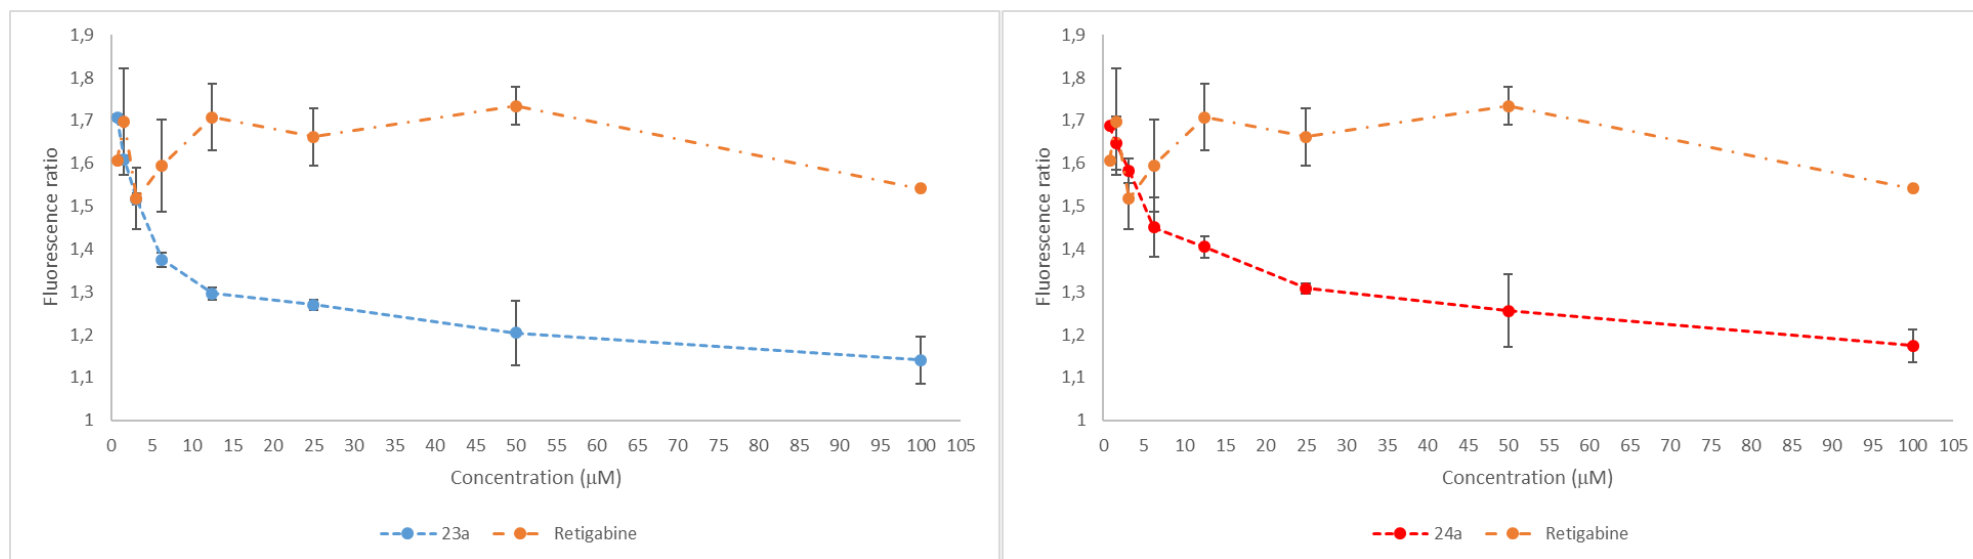

**Figure S2.** Fluorescence intensity ratio at two different wavelengths (I=372 nm and III=383 nm) for **23a**, **24a** and retigabine using pyrene as fluorescent probe.

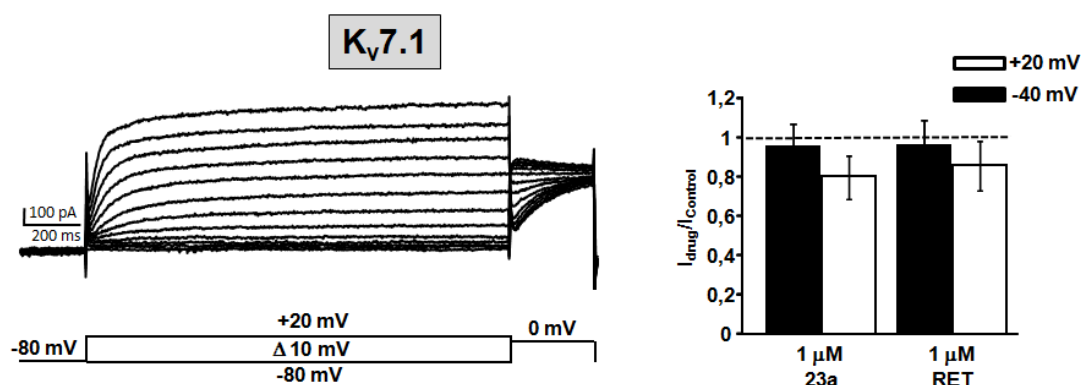

**Figure S3.** Effect of retigabine and **23a** on homomeric Kv7.1 channels

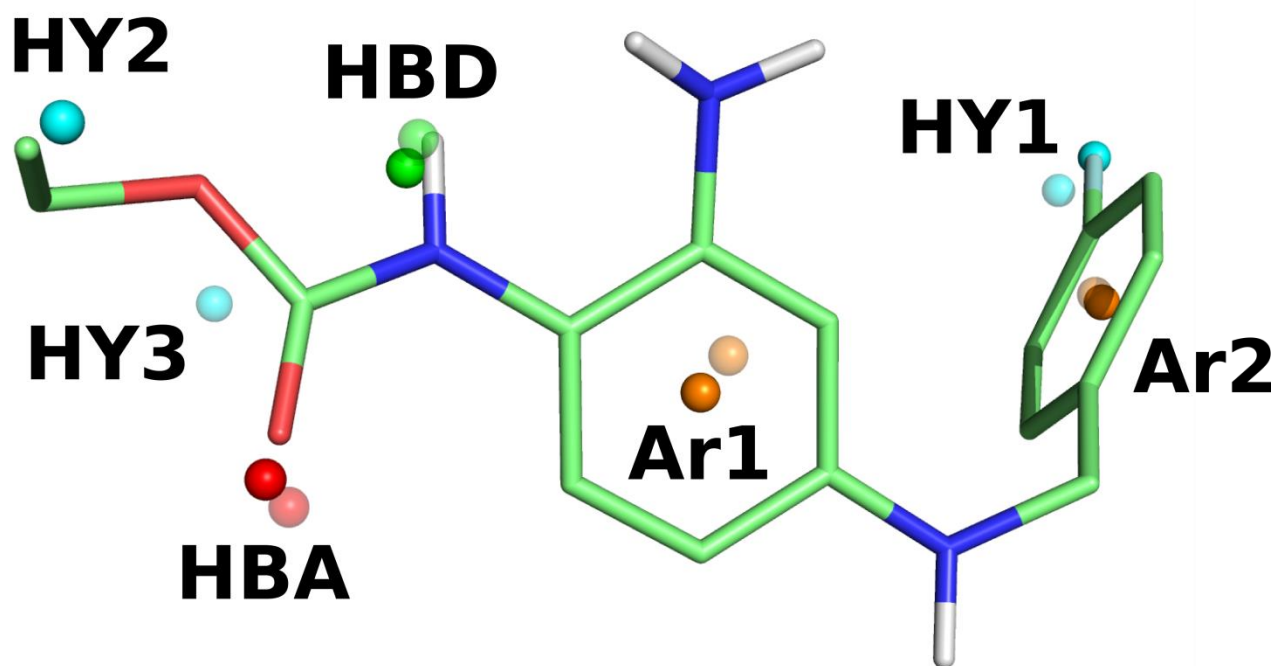

**Figure S4.** Superimposition of models B (solid spheres) and C (transparent spheres). Pharmacophore features are color-coded as follows: Hydrophobic (HY – cyan), Aromatic (Ar – orange), Hydrogen Bond Donor (HBD – green), Hydrogen Bond Donor (HBD – green). Retigabine is depicted in green sticks as reference.

| <i>Molecule</i> | <i>Model A</i> | <i>Model B</i> | <i>Model C</i> |
|-----------------|----------------|----------------|----------------|
| 8a              | X              |                | X              |
| 13a             | X              |                | X              |
| 13b             | X              |                | X              |
| 13d             | X              |                | X              |
| 13g             | X              |                | X              |
| 23a             | X              | X              |                |
| 23c             | X              |                | X              |
| 24a             | X              | X              |                |
| Retigabine      | X              | X              |                |
| 23b             | X              | X              | X              |
| 24b             | X              | X              | X              |
| 25a             | X              | X              | X              |
| 27a             | X              | X              | X              |
| 28a             | X              | X              | X              |
| 29a             | X              | X              | X              |
| 33a             | X              | X              | X              |
| 33b             | X              | X              | X              |
| 34              | X              | X              | X              |

**Table S3.** Training sets of models A, B and C. Active compounds are typed in green, while inactive ones are in red. Crosses indicate whether the compound was used for a model or not.



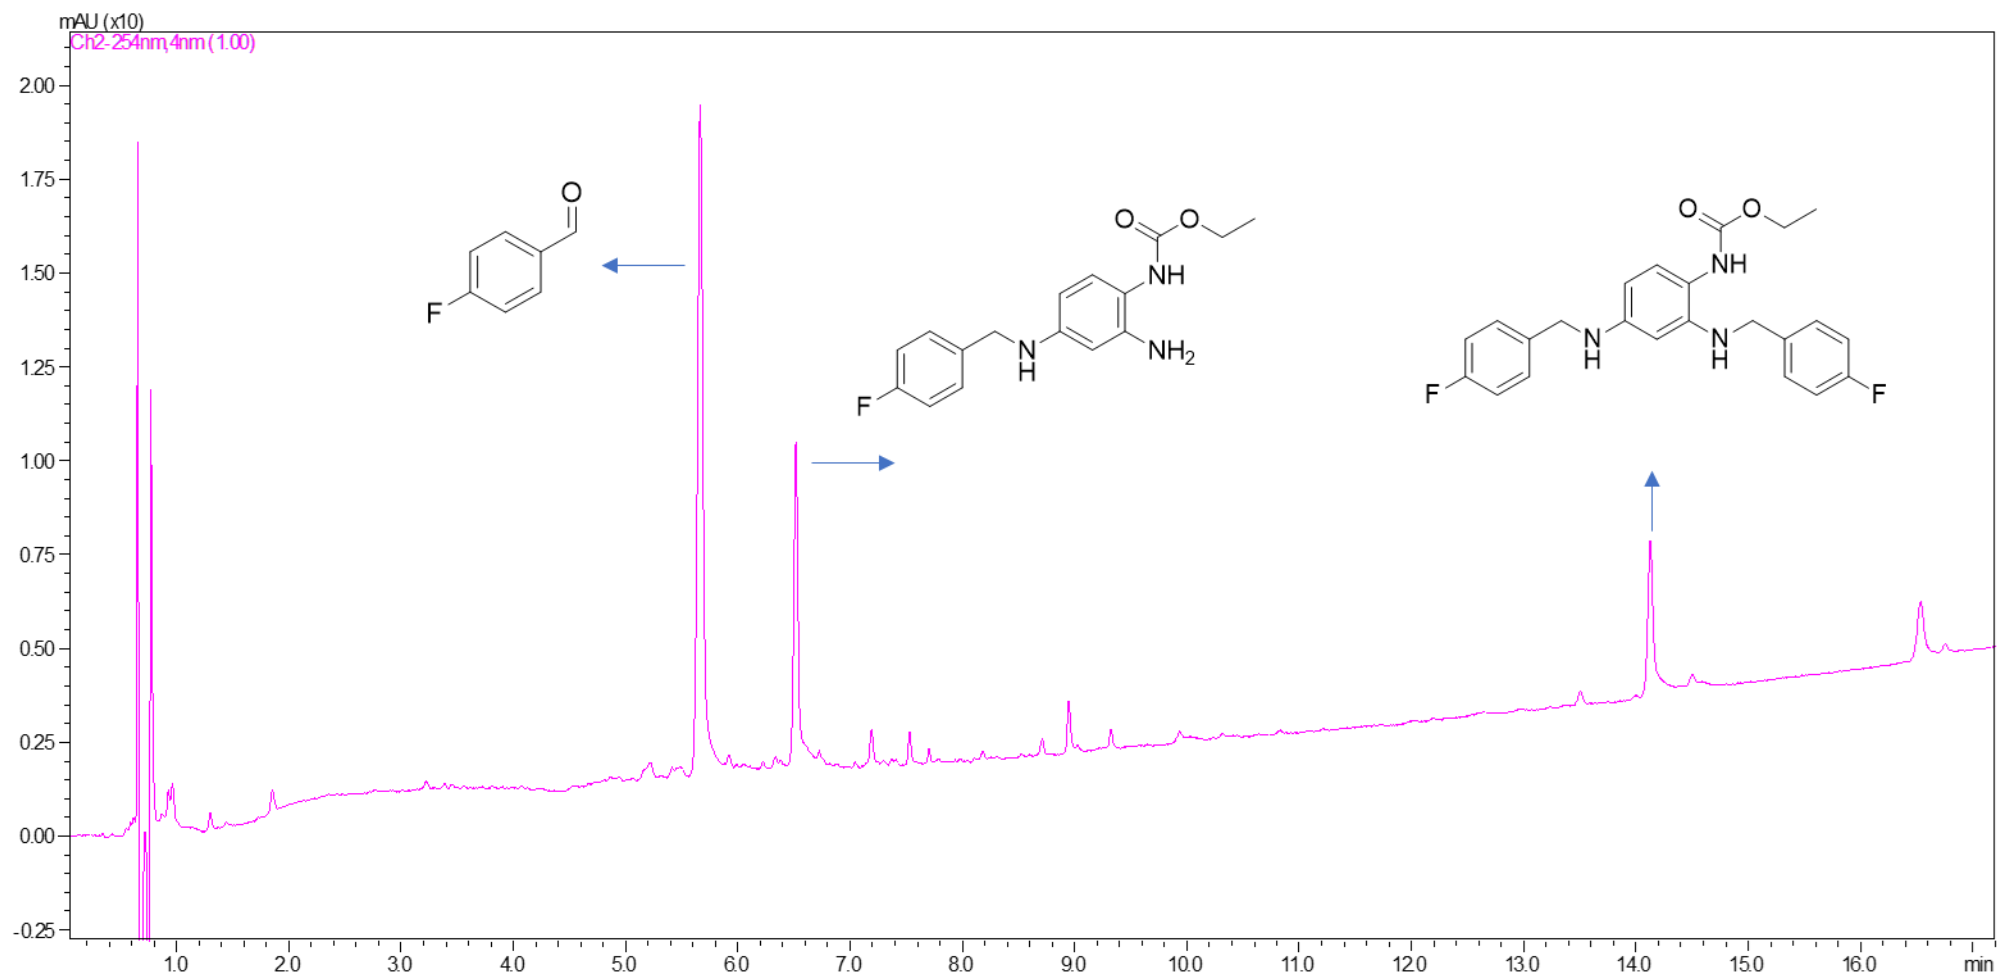

**Figure S5.** UHPLC profile of a retigabine batch after 6h visible light irradiation

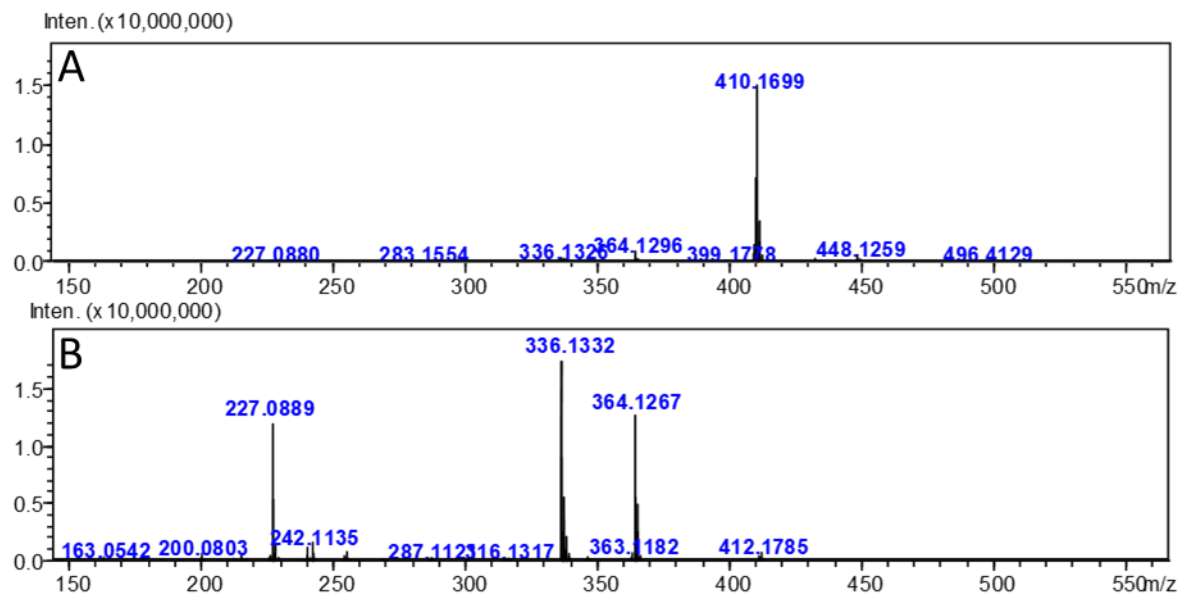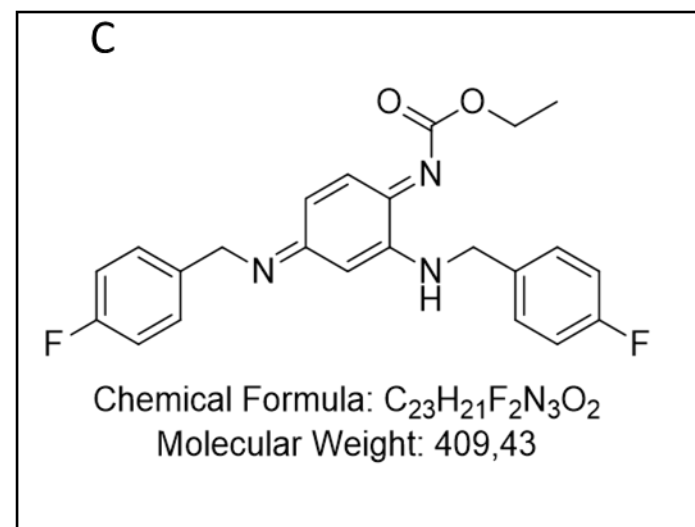

**Figure S6.** Full scan profile (A), MS/MS profile (B) and predicted structure of retigabine photoxidative byproduct eluting at 14.23 minutes (C).

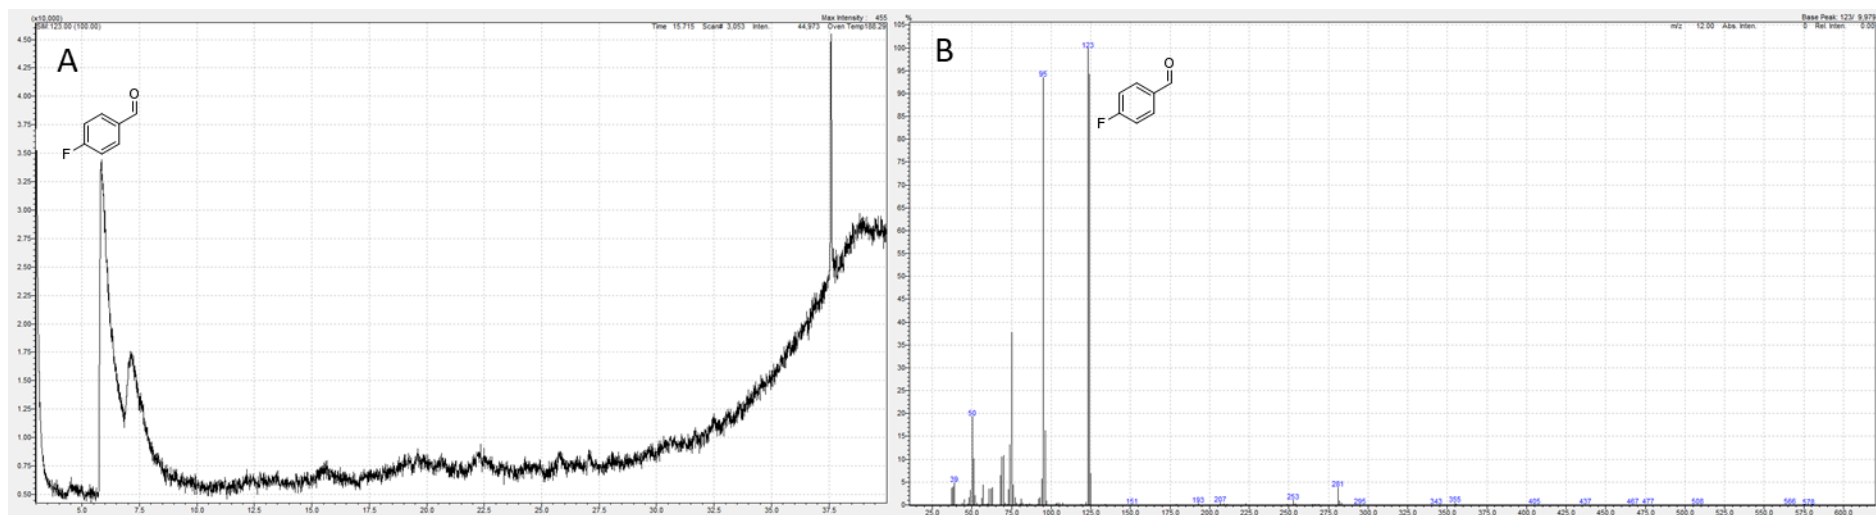

**Figure S7.** (A) Retigabine GC profile and (B) full scan mass spectra of the main peak (4-fluorobenzaldehyde)

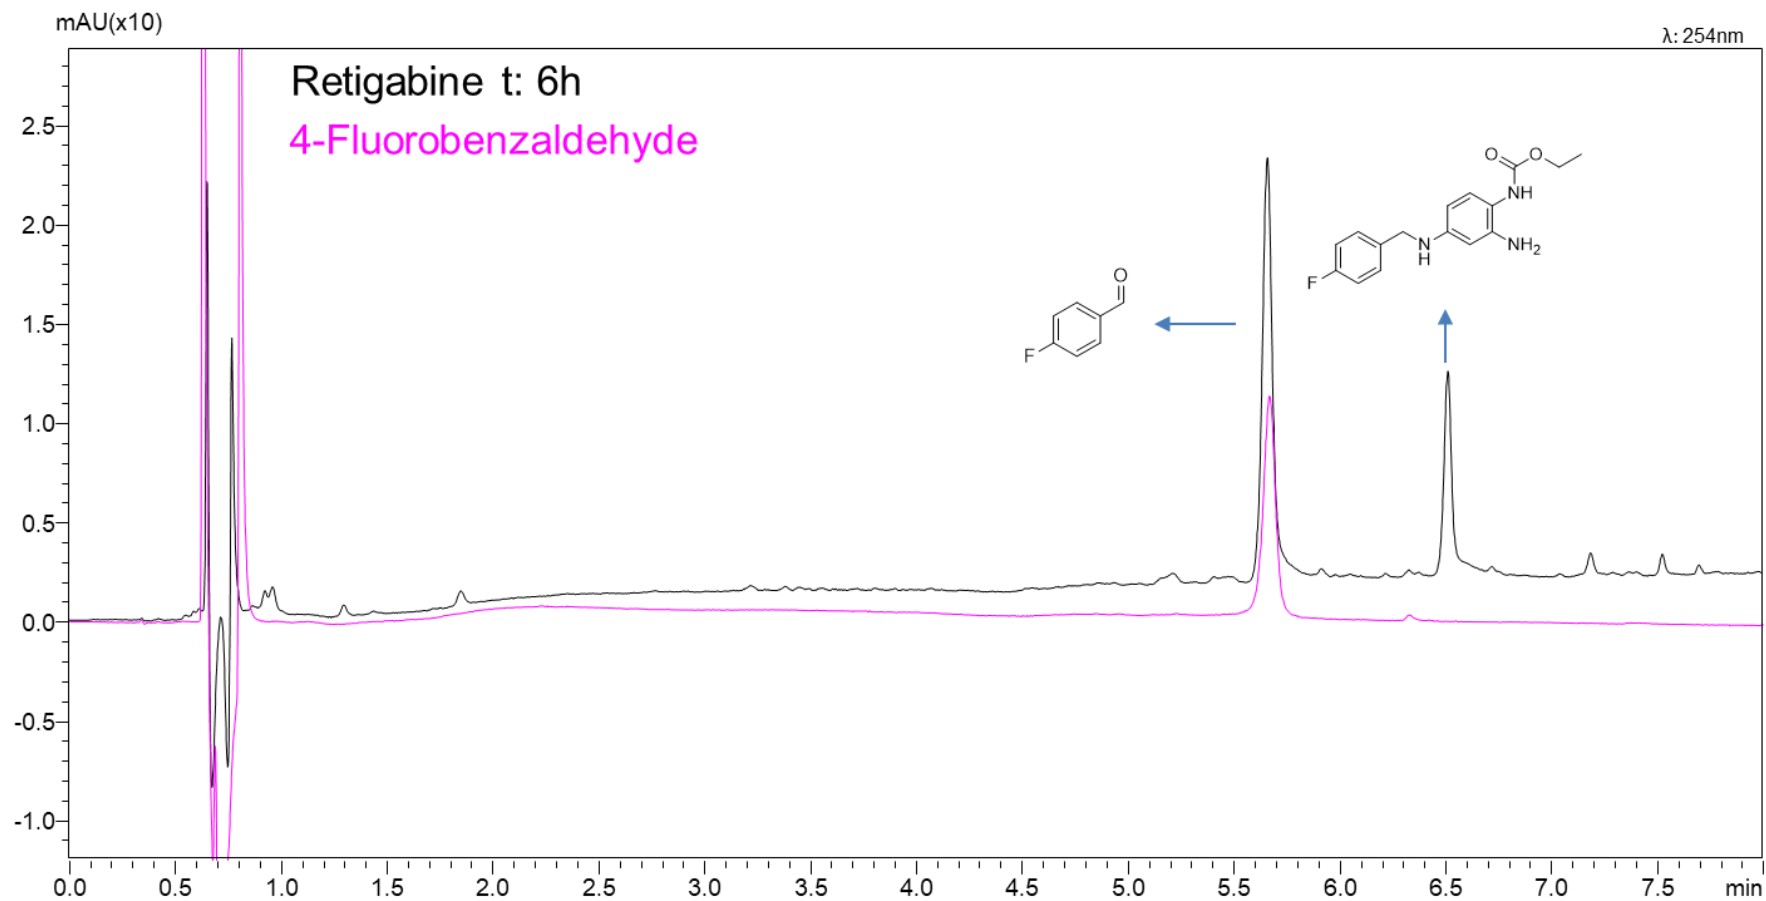

**Figure S8.** Overlapping HPLC traces of a 4-fluorobenzaldehyde standard solution and a photodegraded retigabine batch

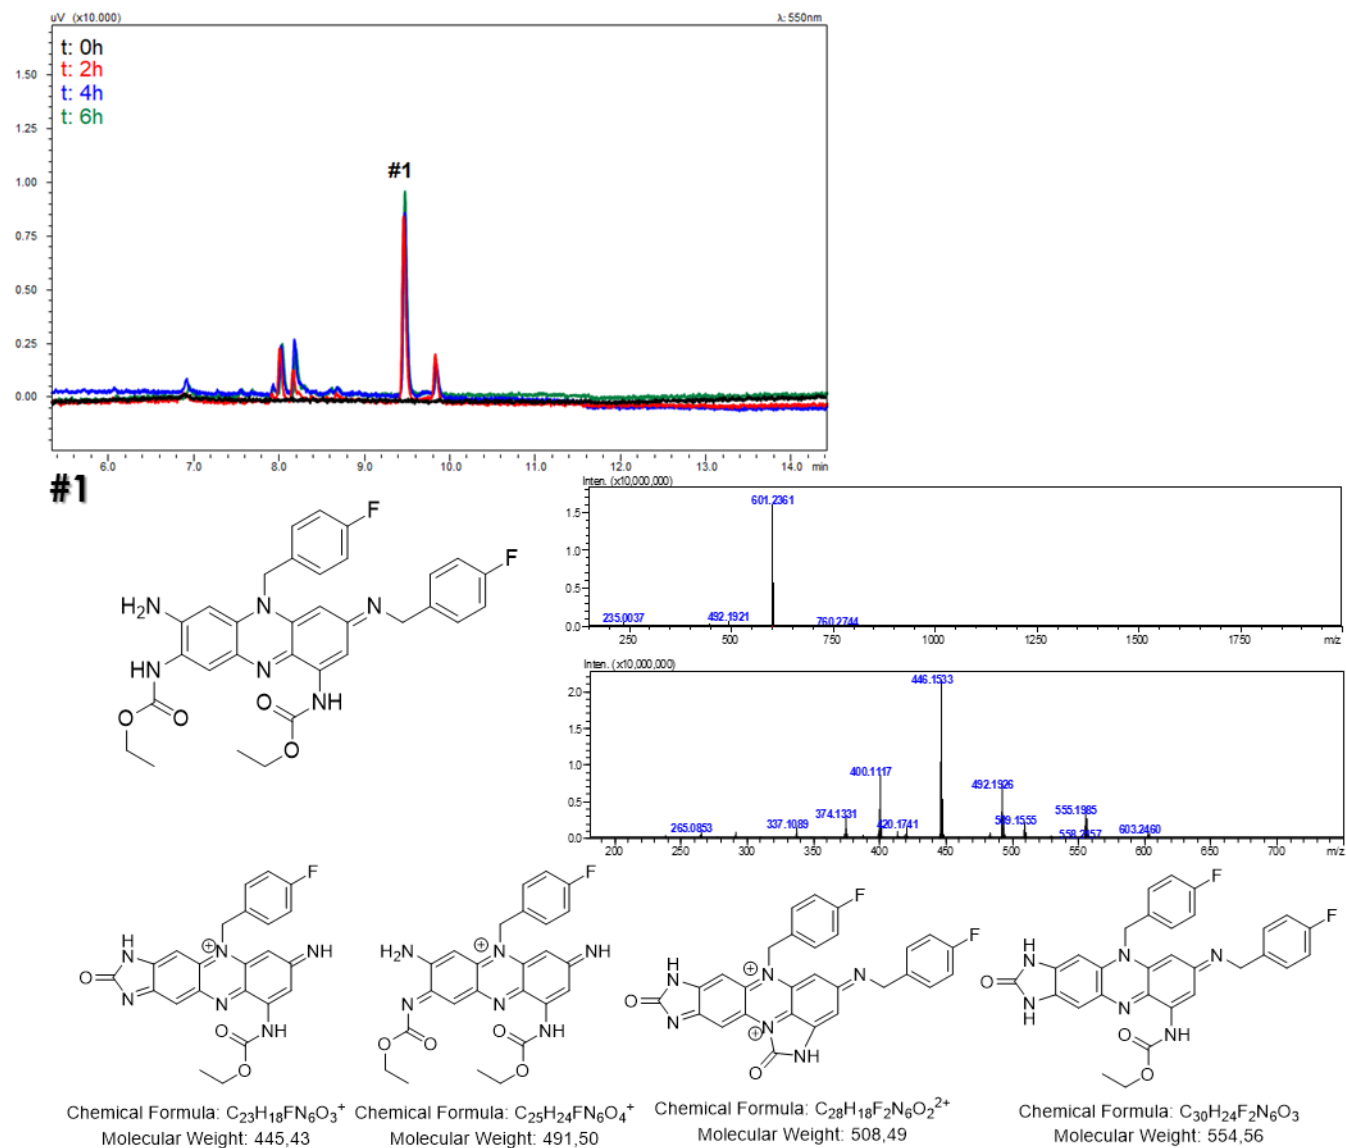

**Figure S9.** MS/MS profile for unknown compound **#1** and the corresponding putative molecular structures

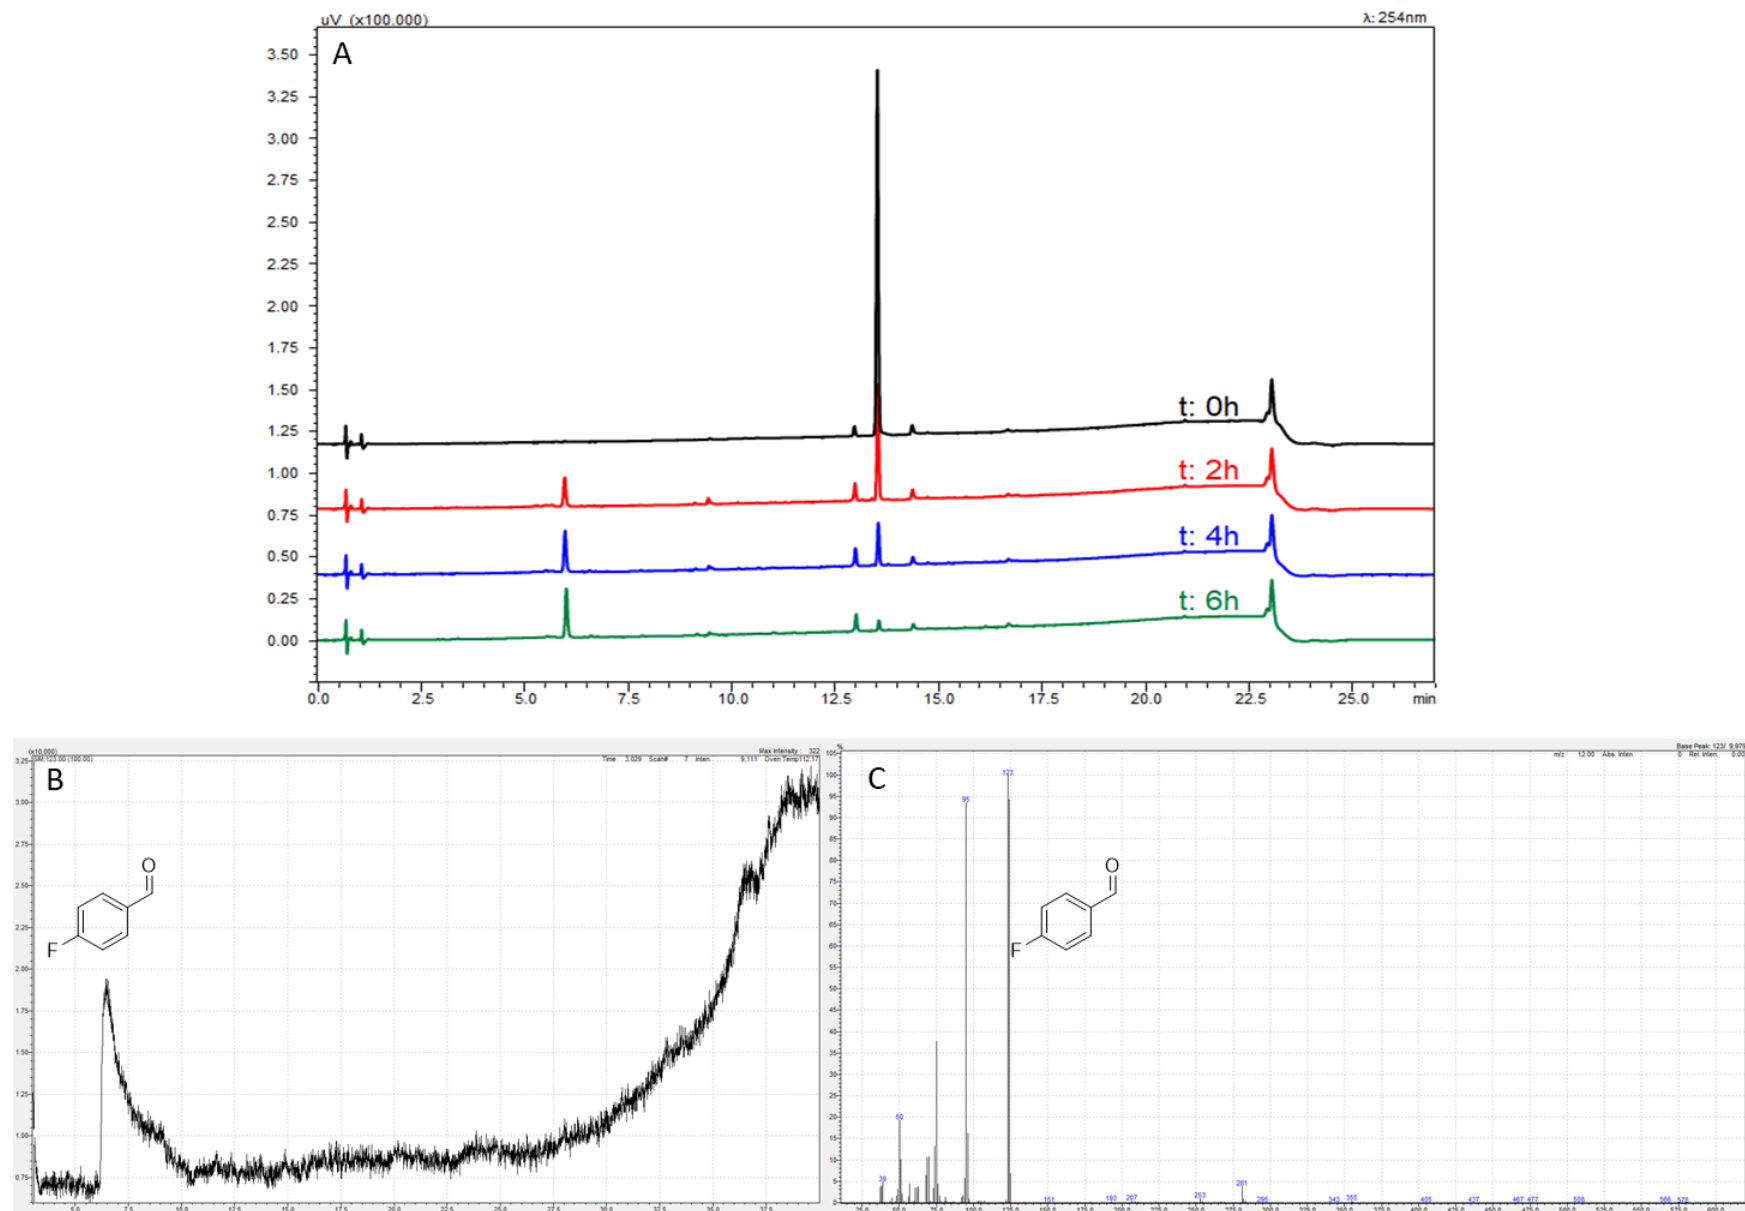

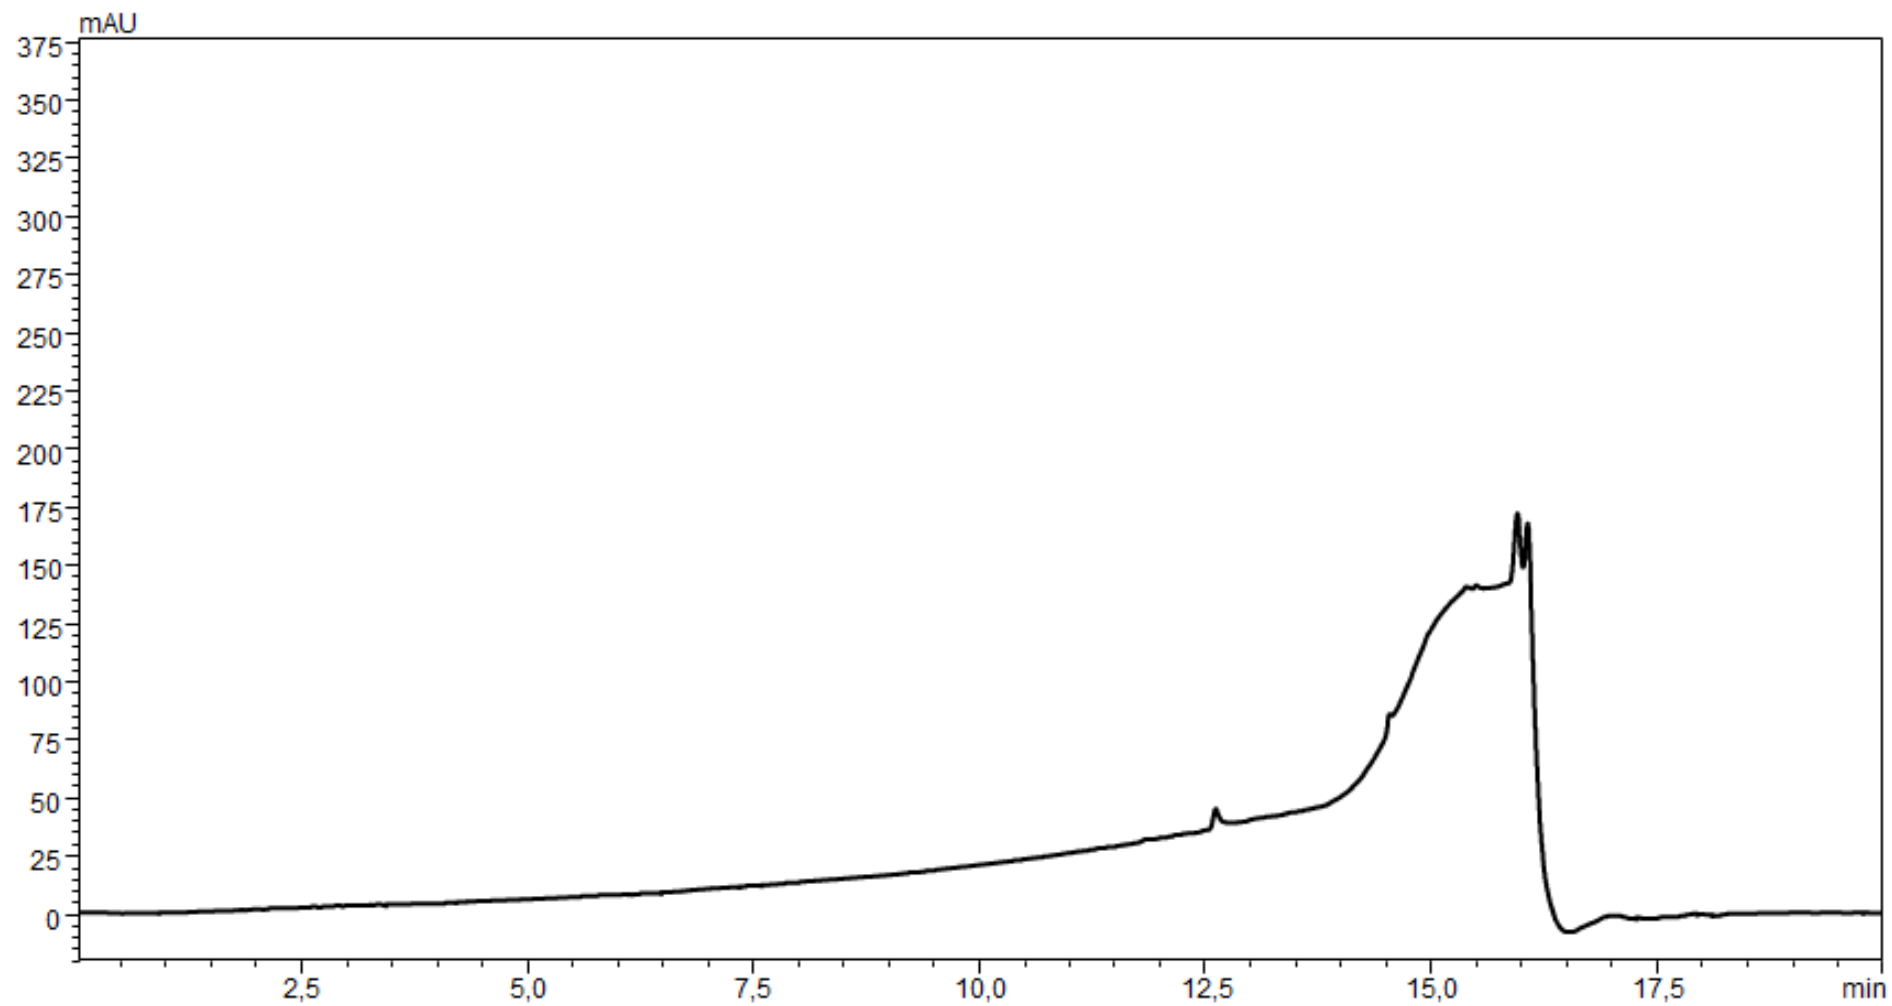

**Figure S11.** Blank RP-HPLC trace of the analytical method used for purity determination of compounds **4a-b**, **5a-b**, **6-7**, **8a-i**, **9a-c**, **13a-g**, **16a-b**, **19**, **23a-d**, **24a-b**, **25a-29a** and **34**

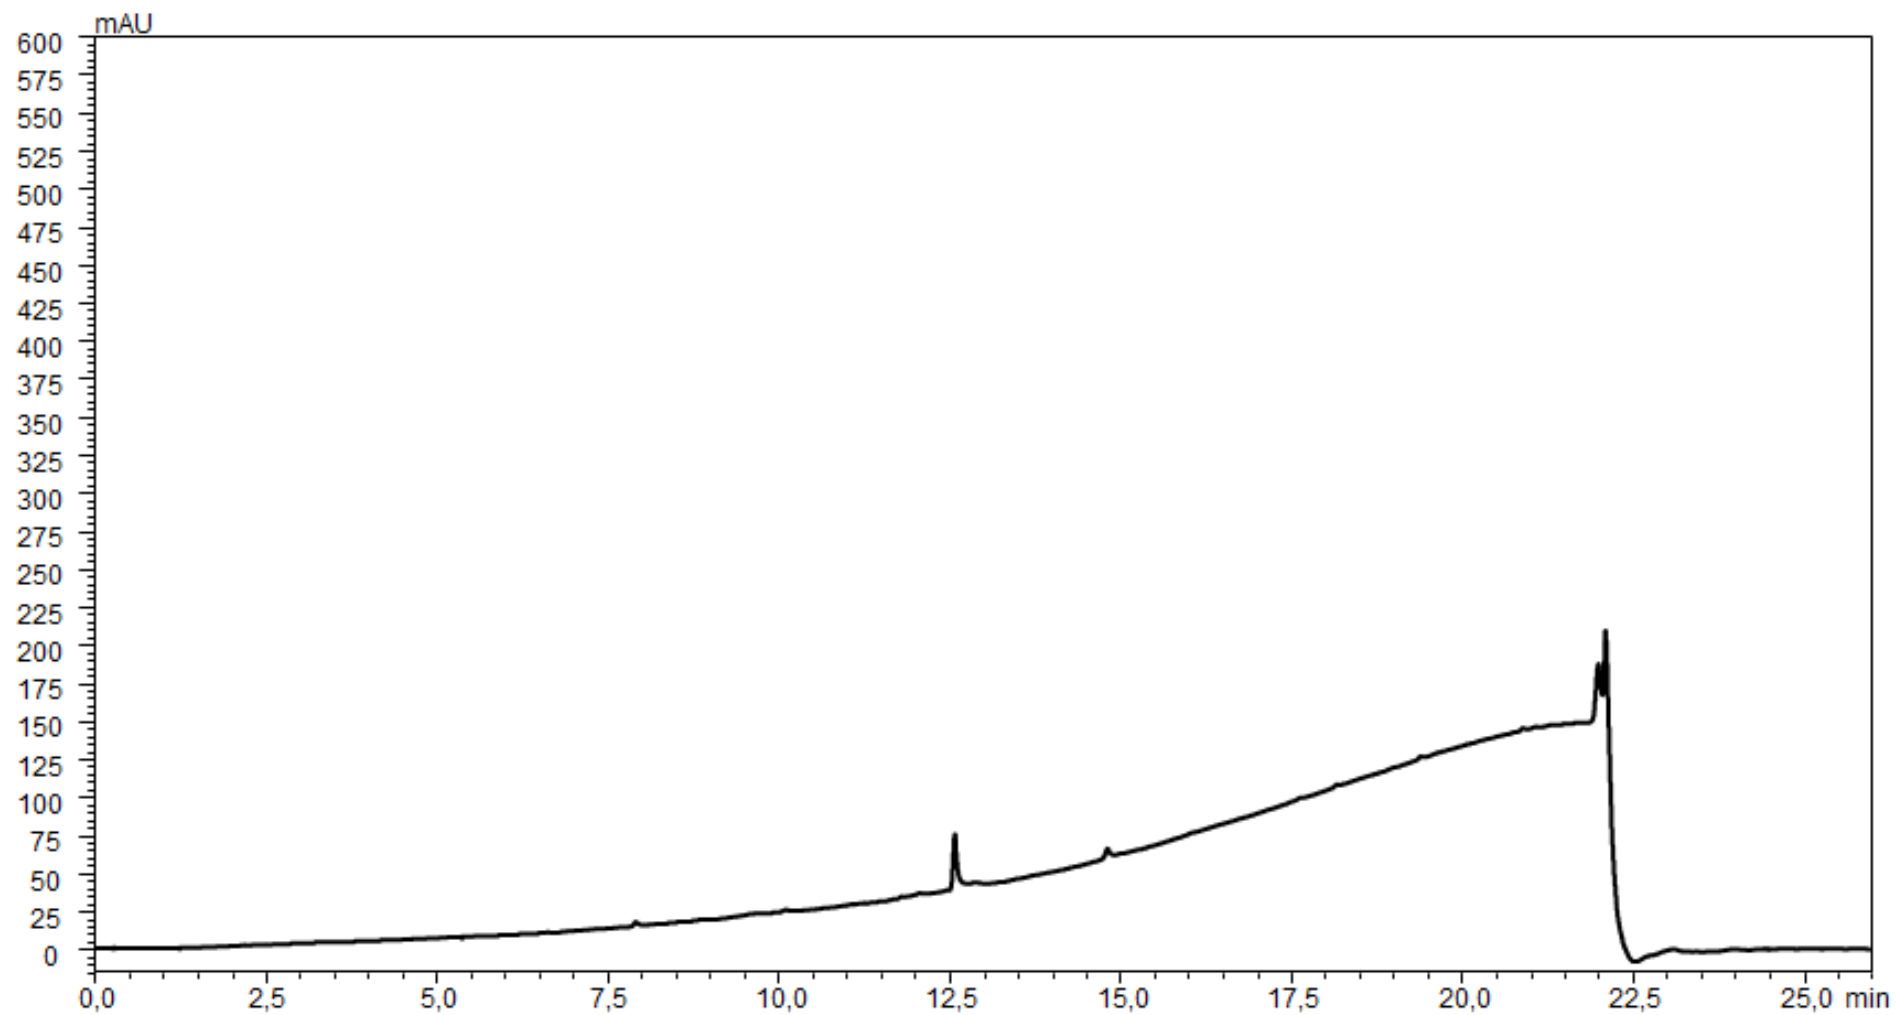

**Figure S12.** Blank RP-HPLC trace for the analytical method used for purity determination of compounds **33a** and **33b**.



## 2. NMR spectra and HPLC traces of synthesized compounds

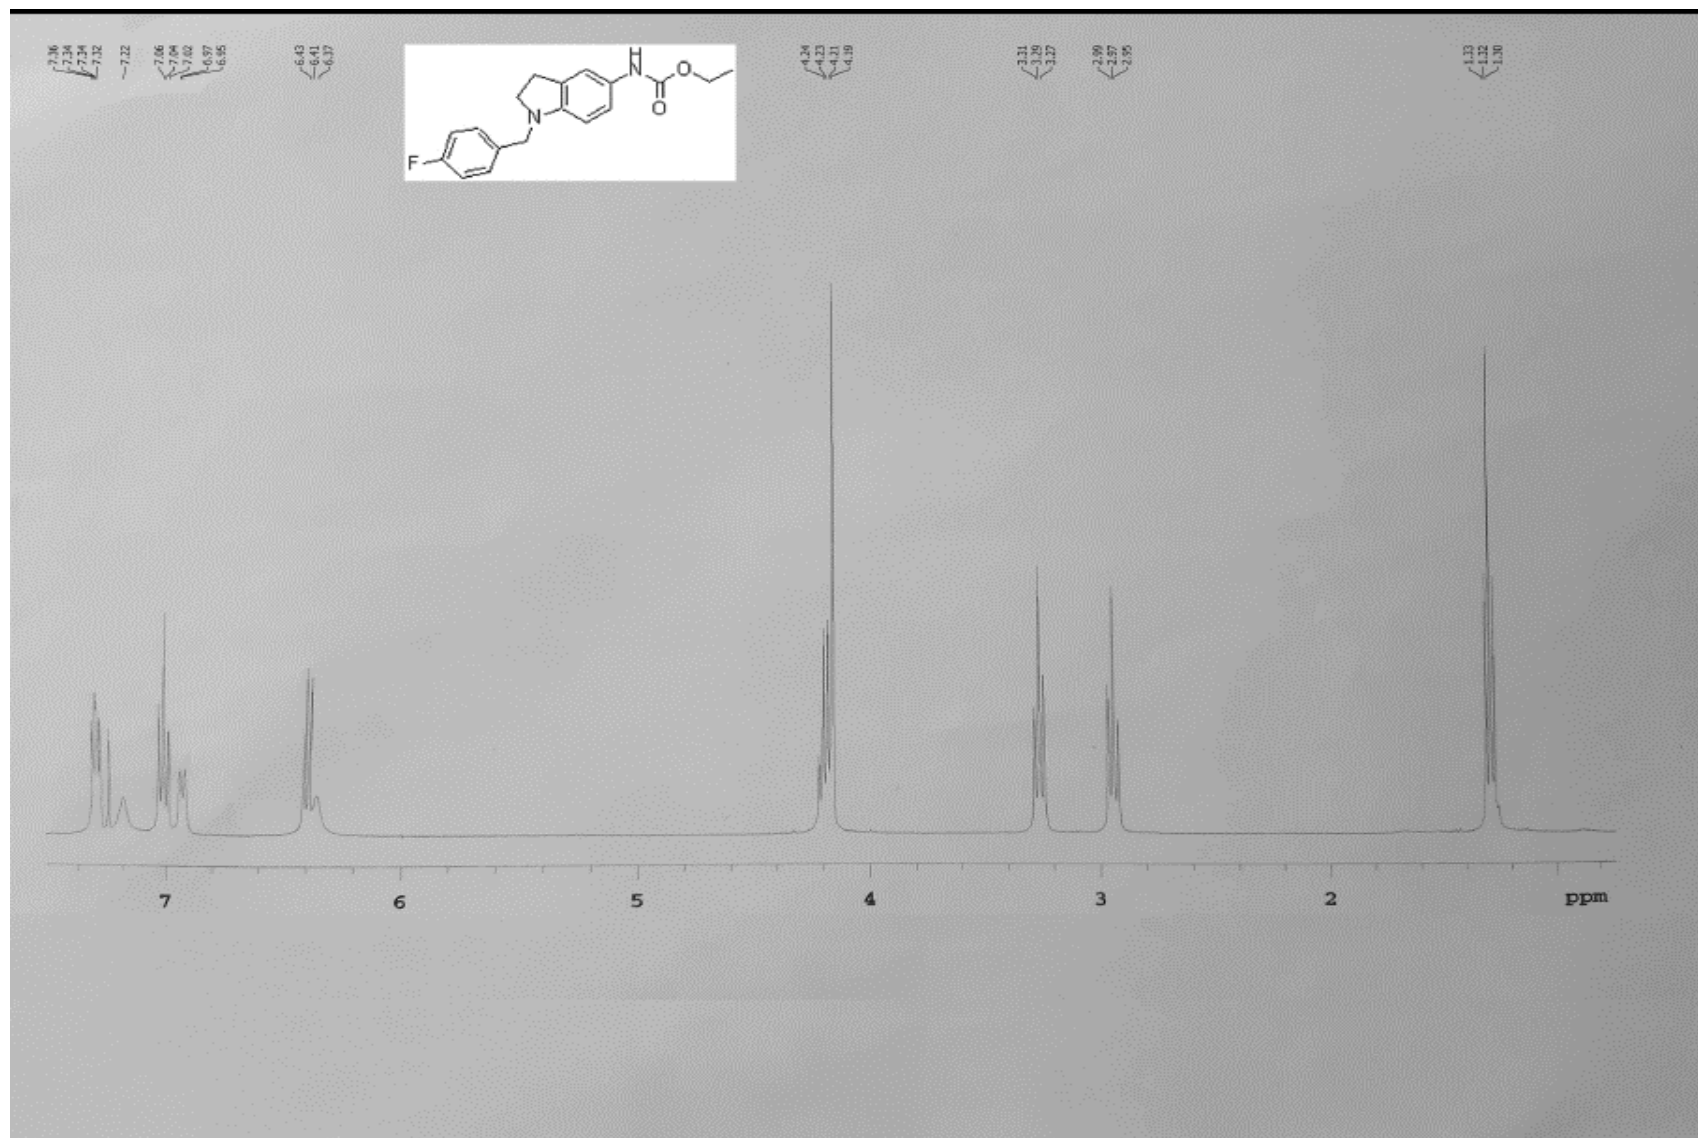

<sup>1</sup>H NMR of compound **4a**

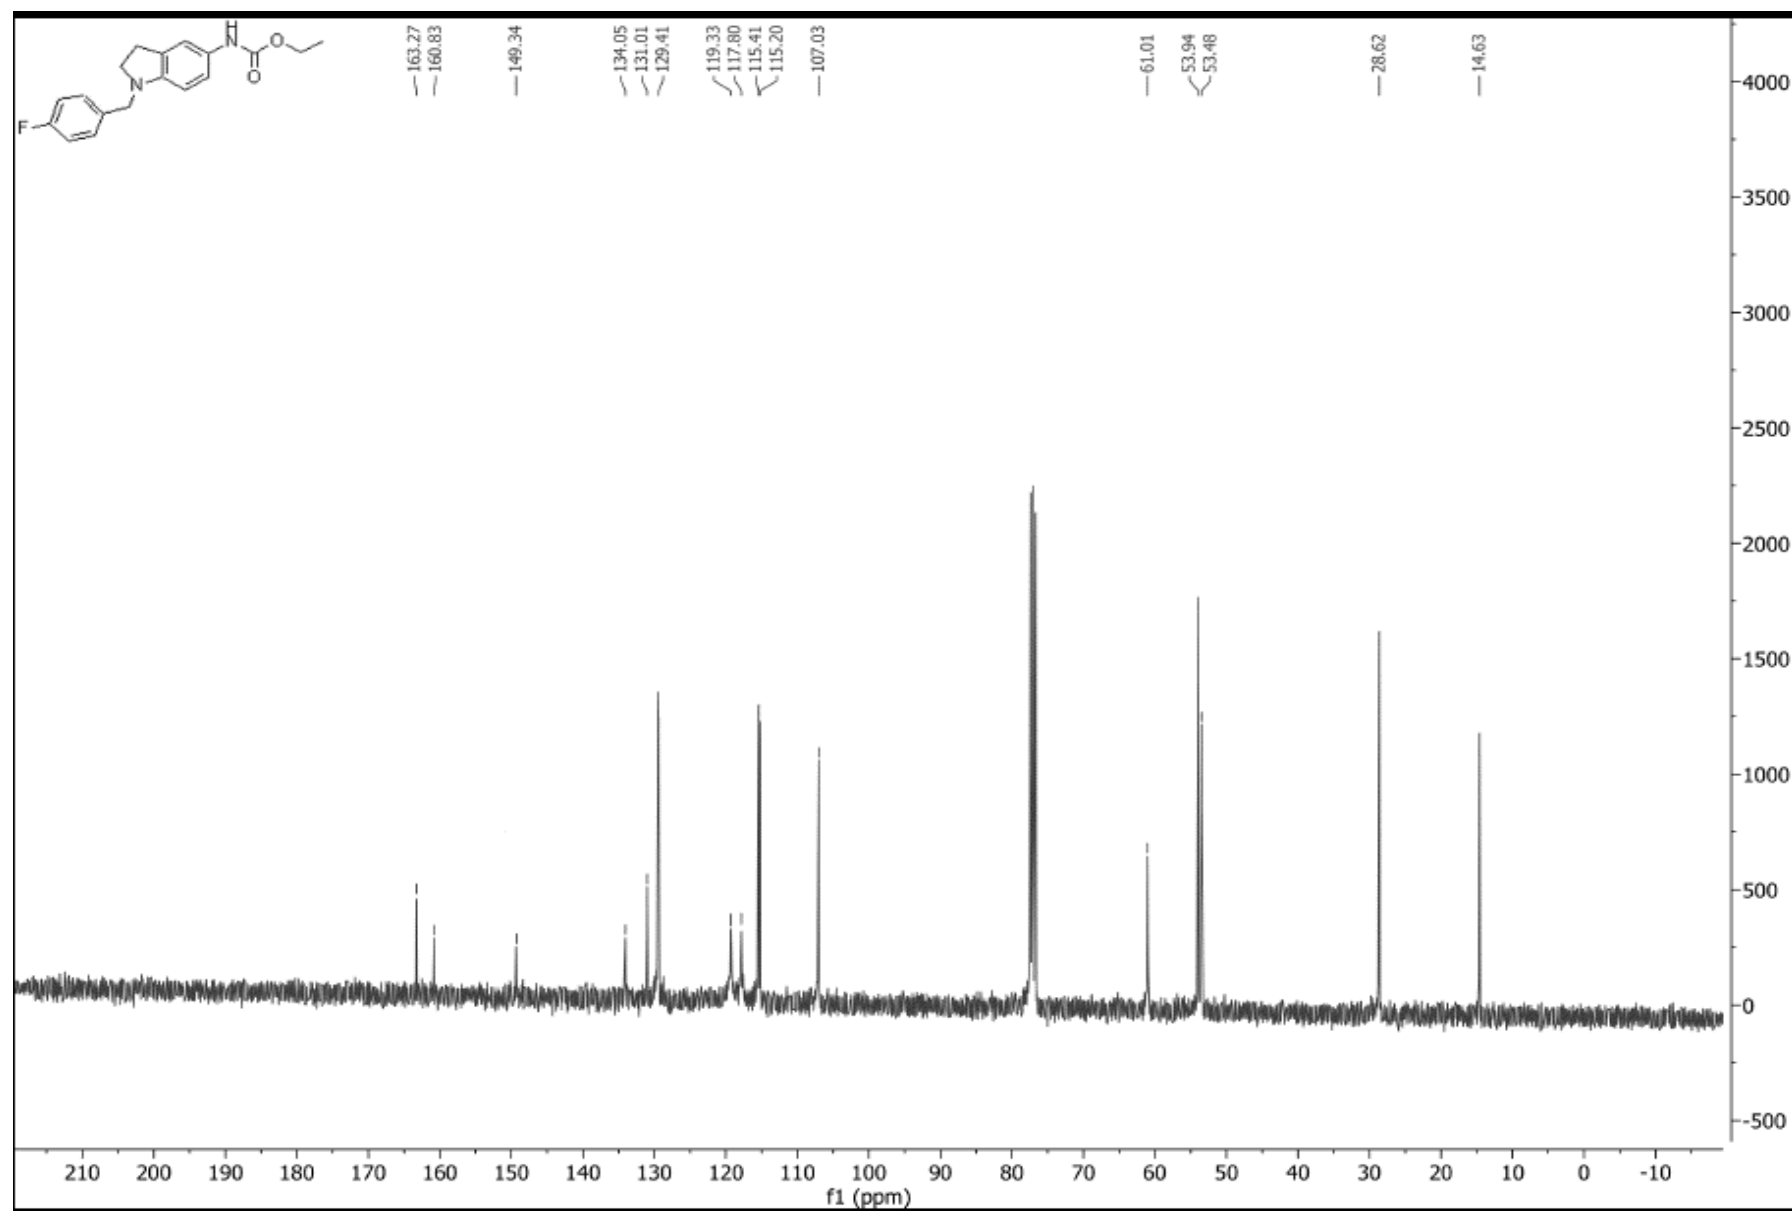

<sup>13</sup>C NMR of compound **4a**

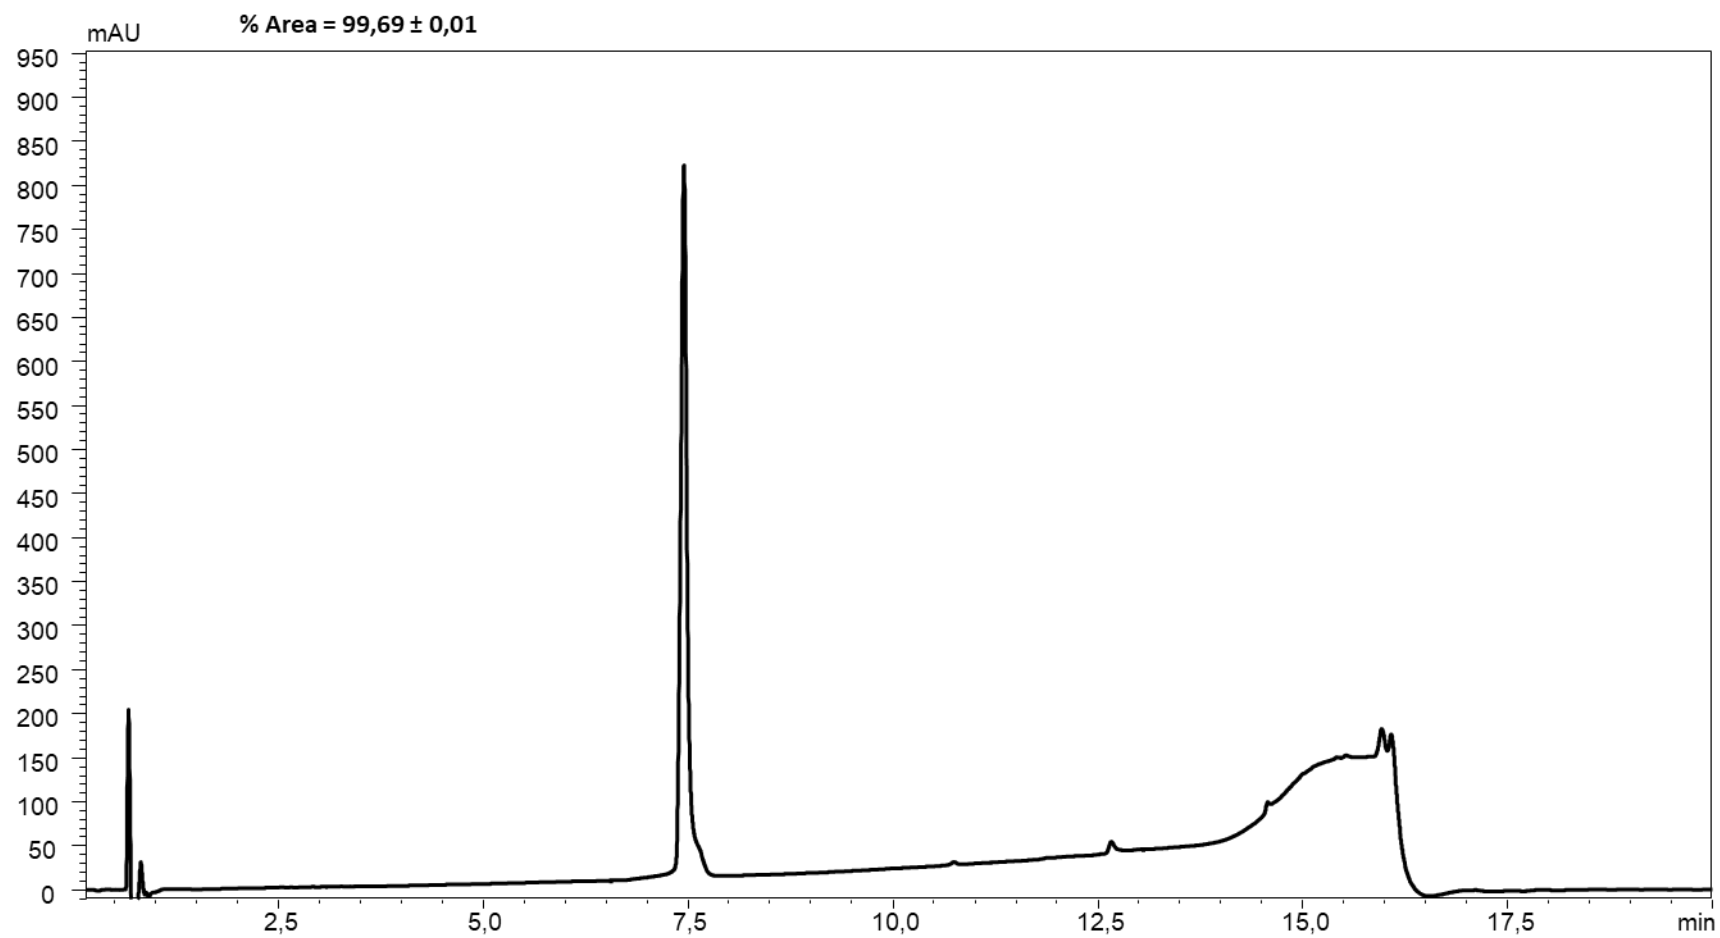

RP-HPLC trace of compound **4a**

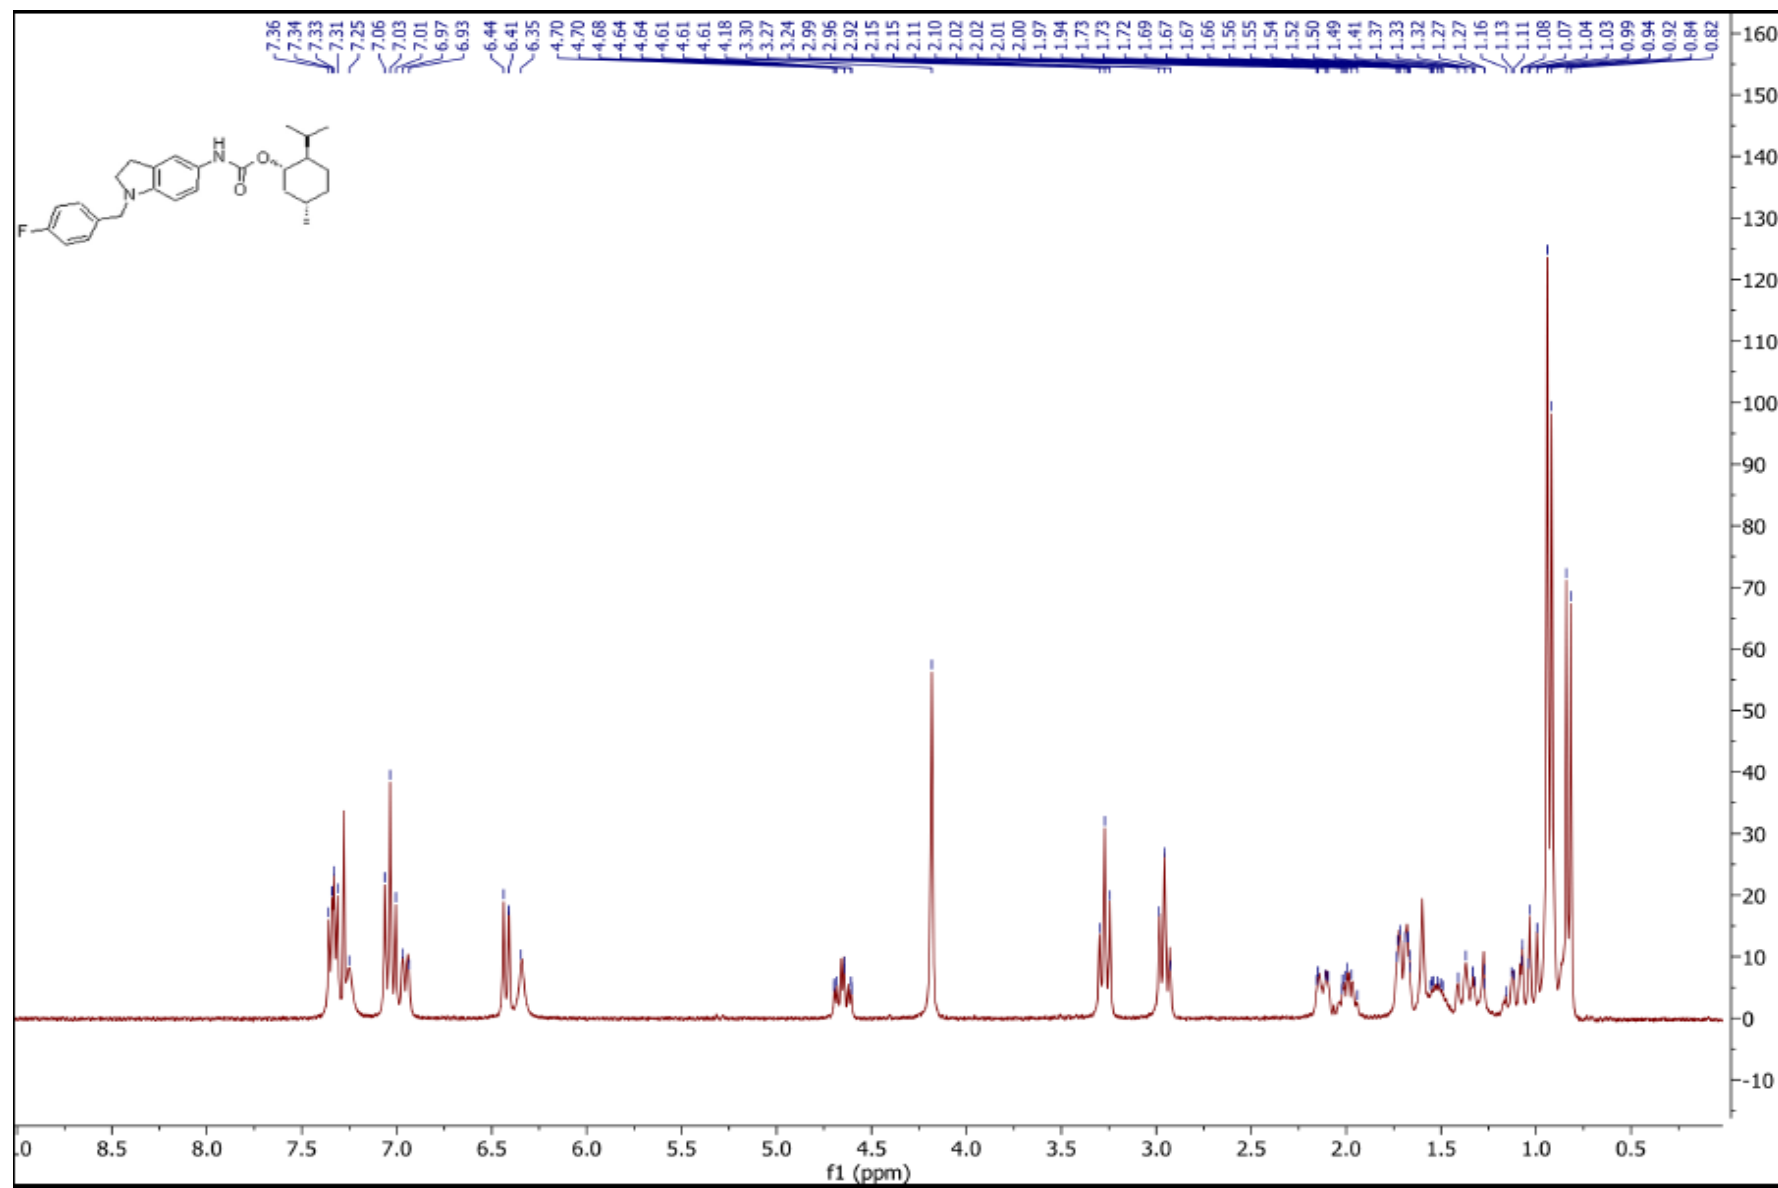

<sup>1</sup>H NMR of compound **4b**

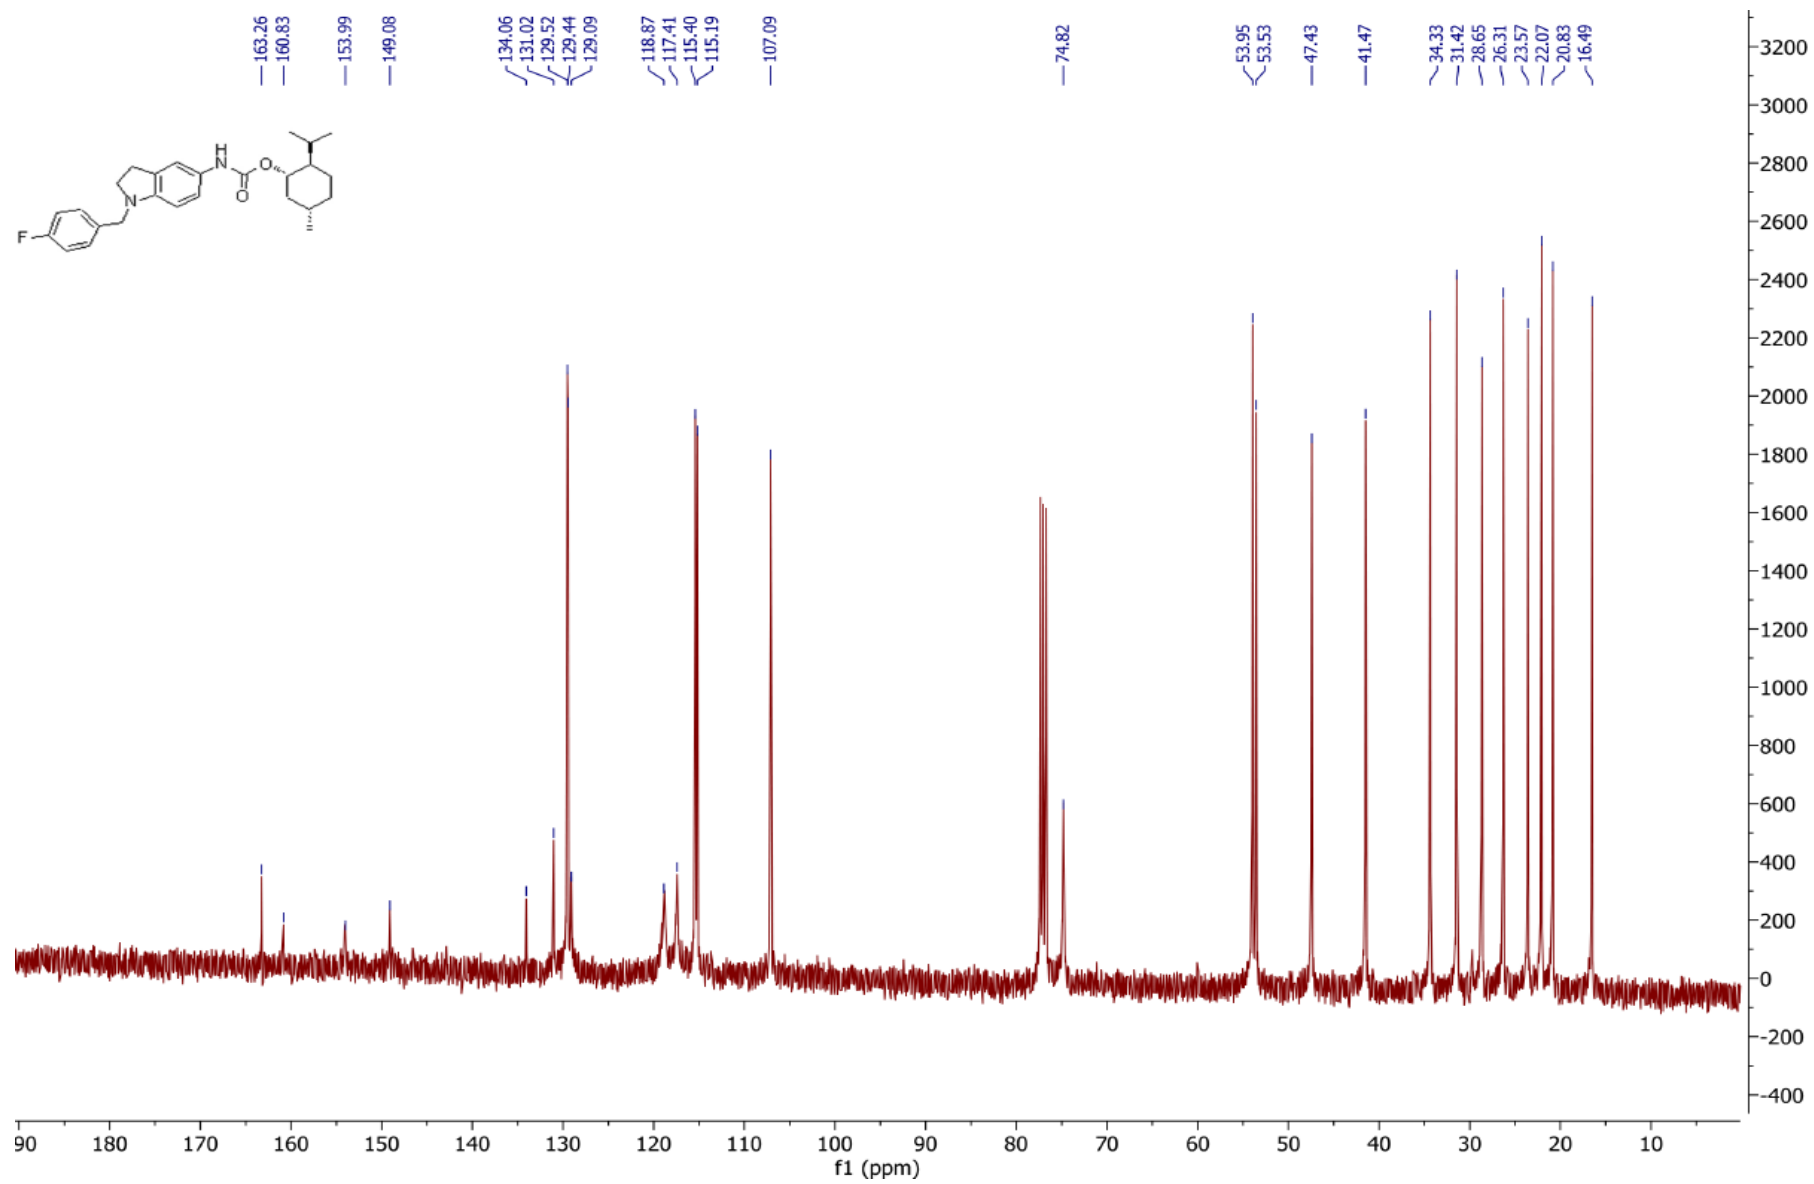

<sup>13</sup>C NMR of compound **4b**

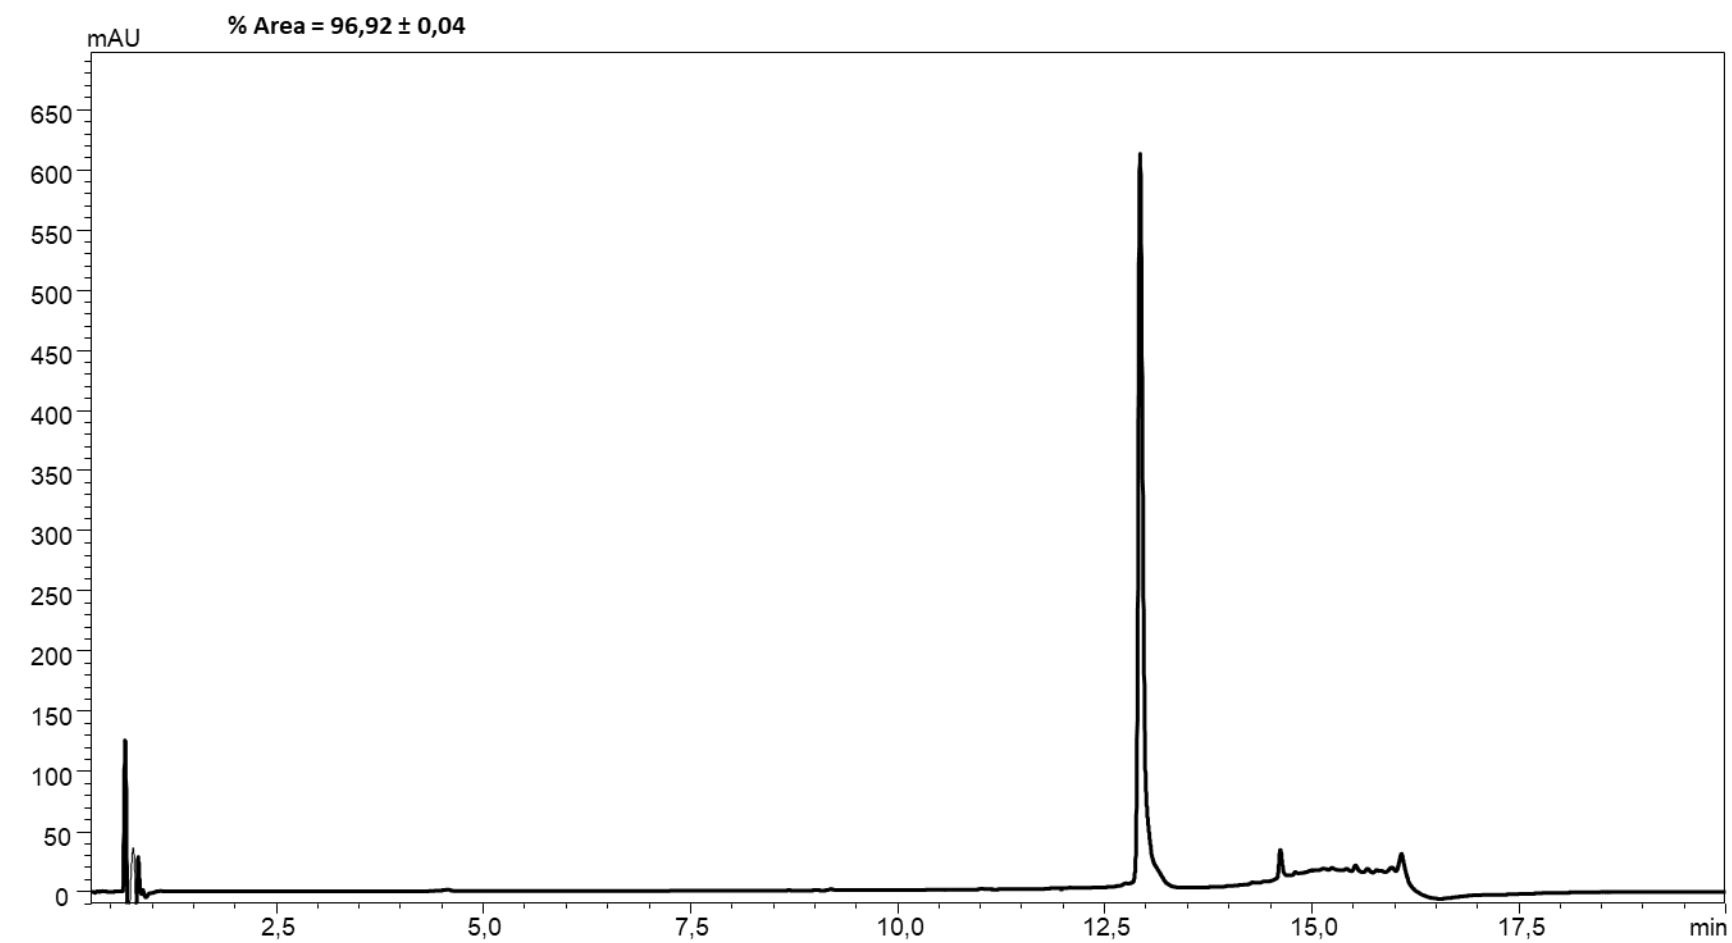

RP-HPLC trace of compound **4b**

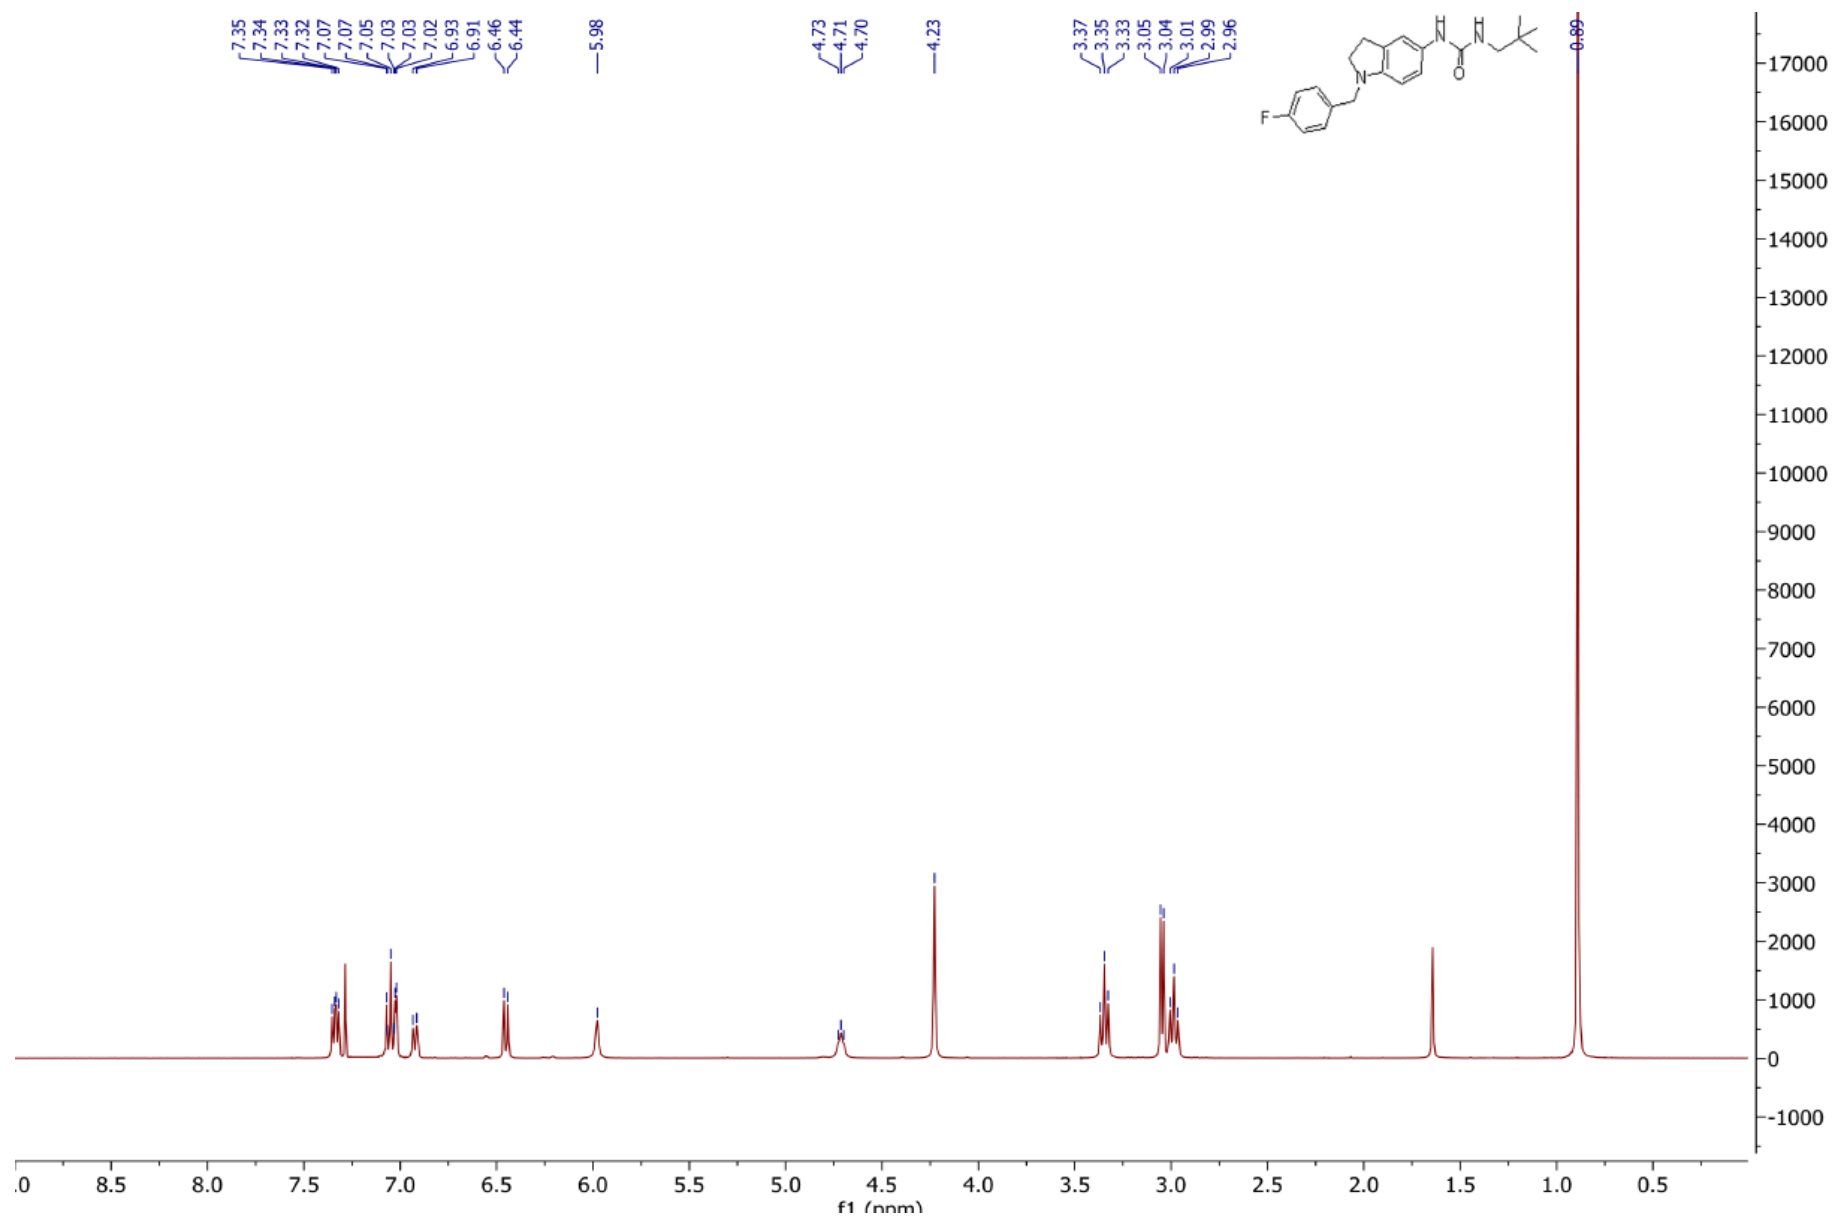

<sup>1</sup>H NMR of compound **5a**

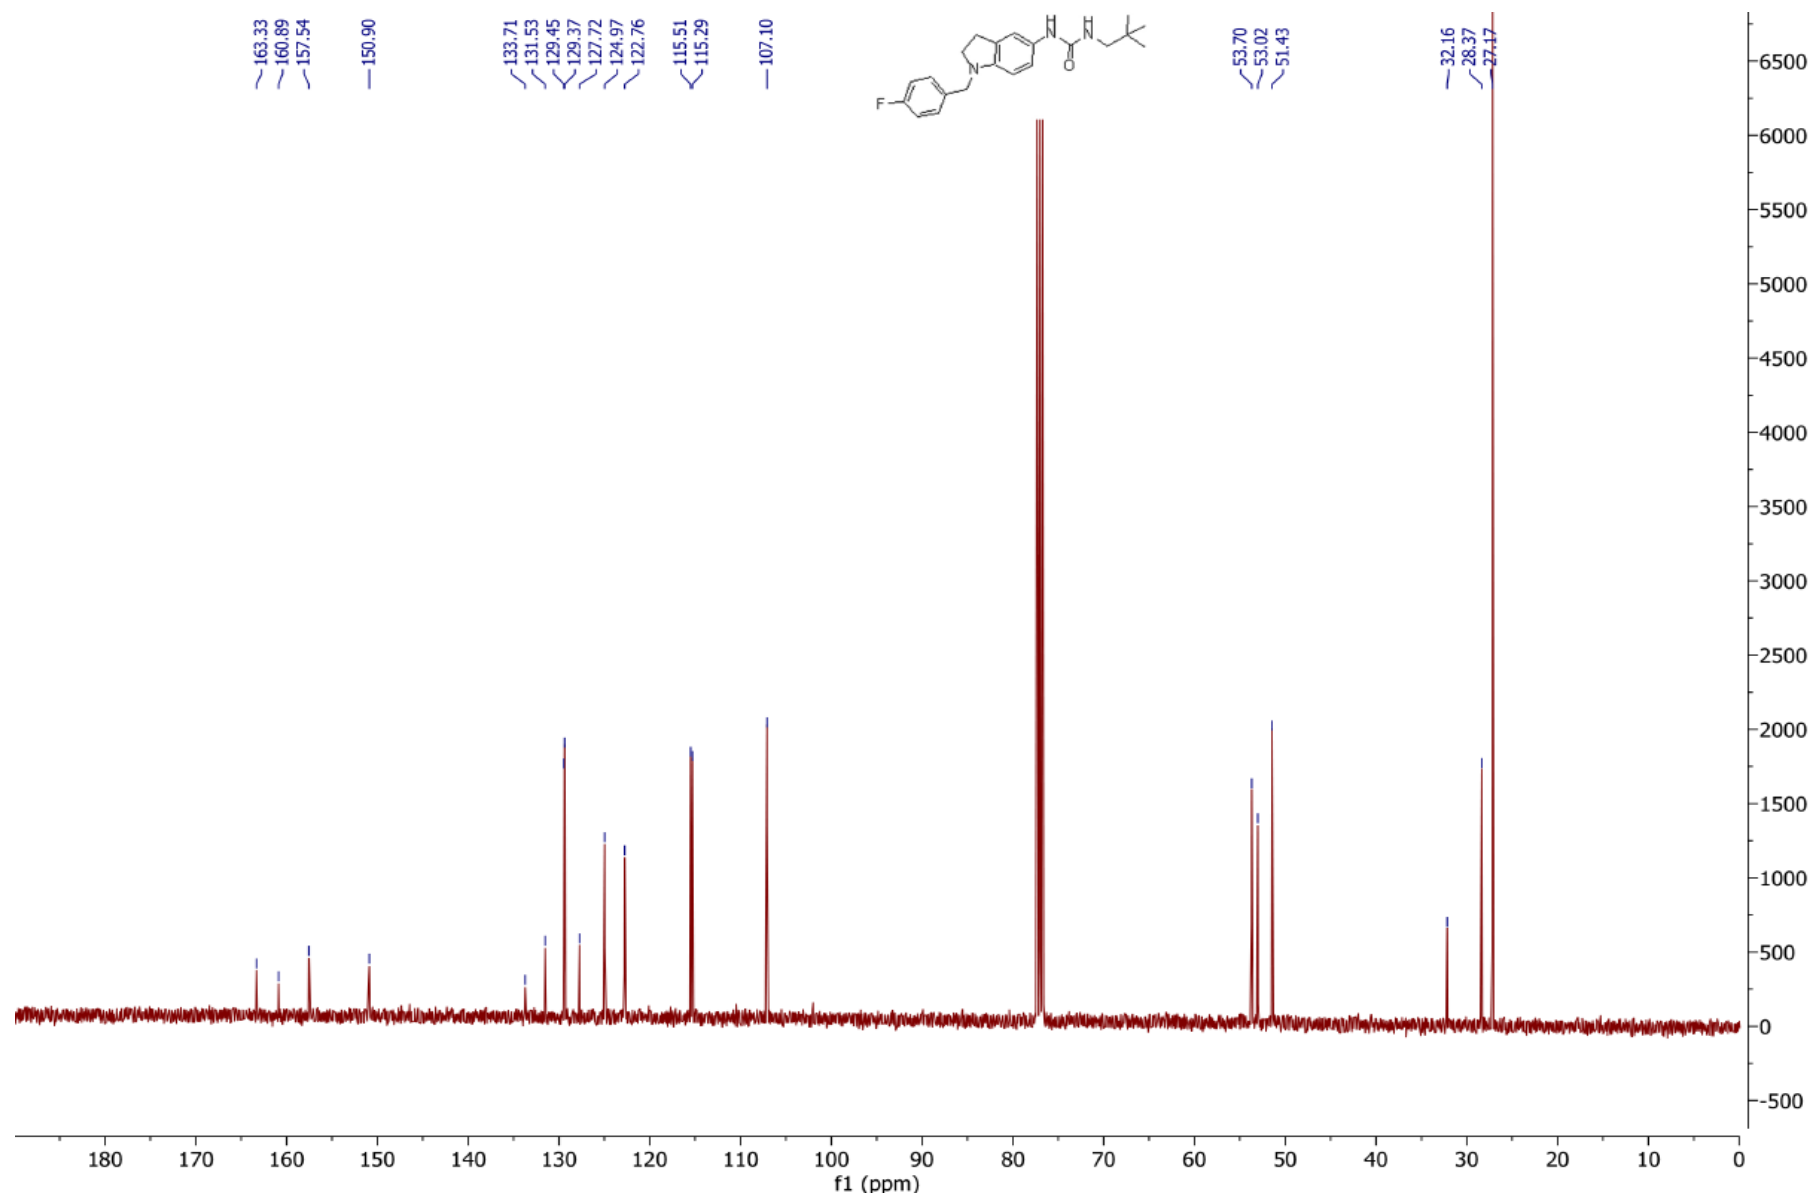

<sup>13</sup>C NMR of compound **5a**



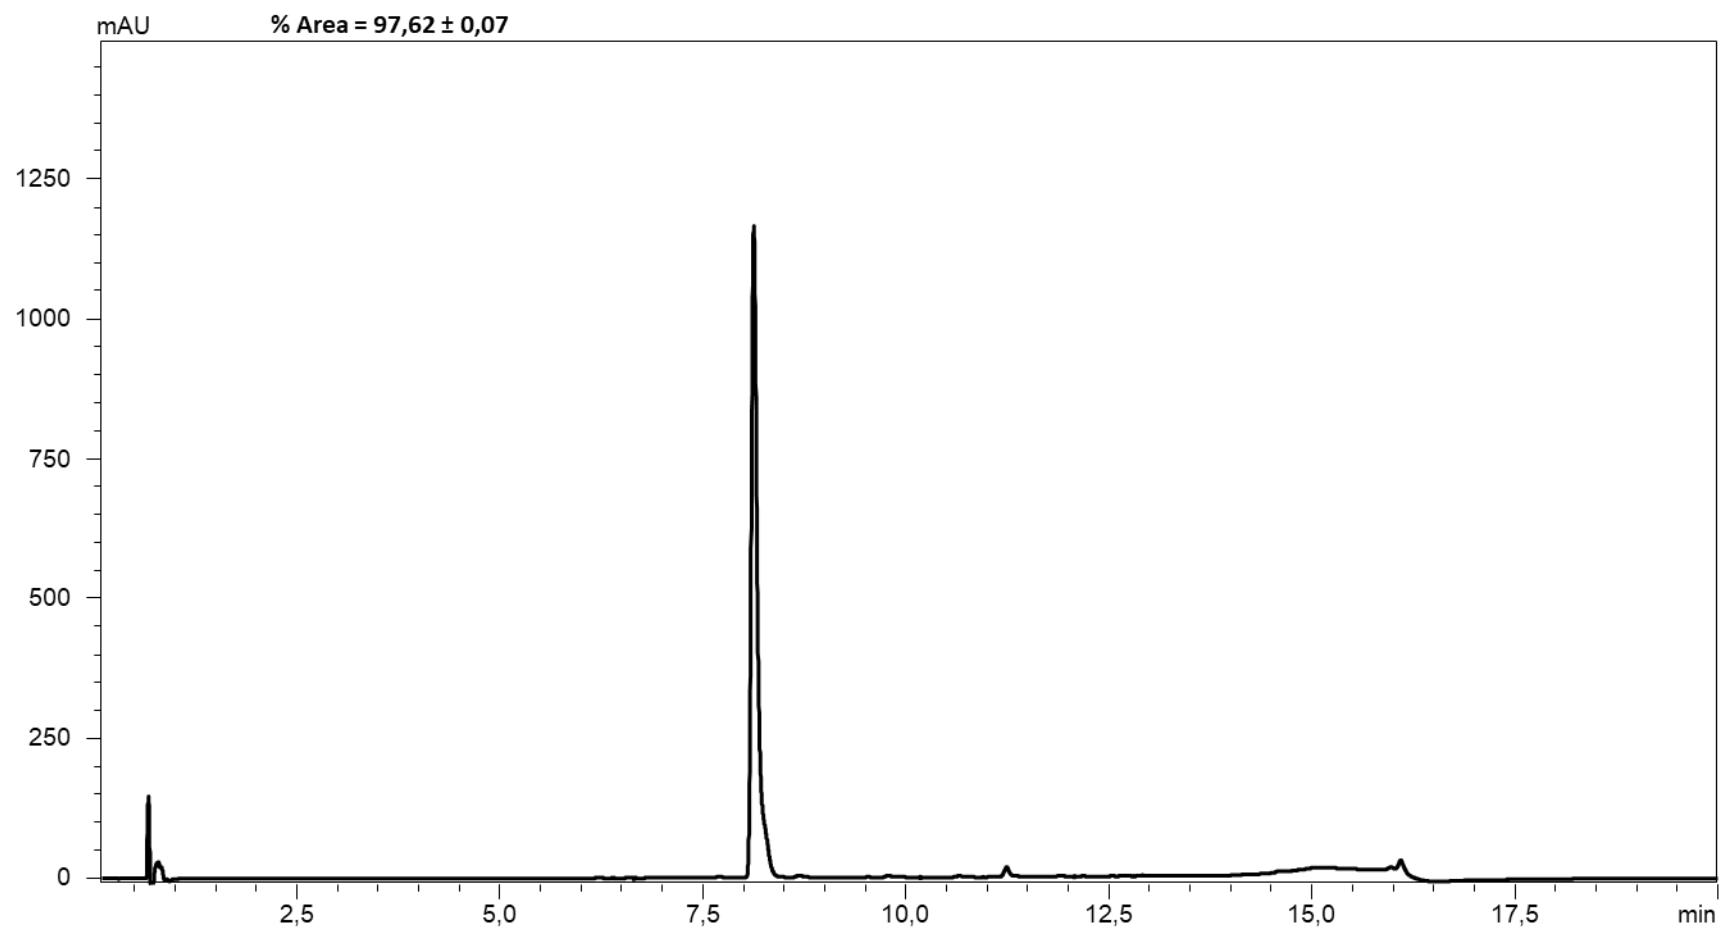

RP-HPLC trace of compound **5a**

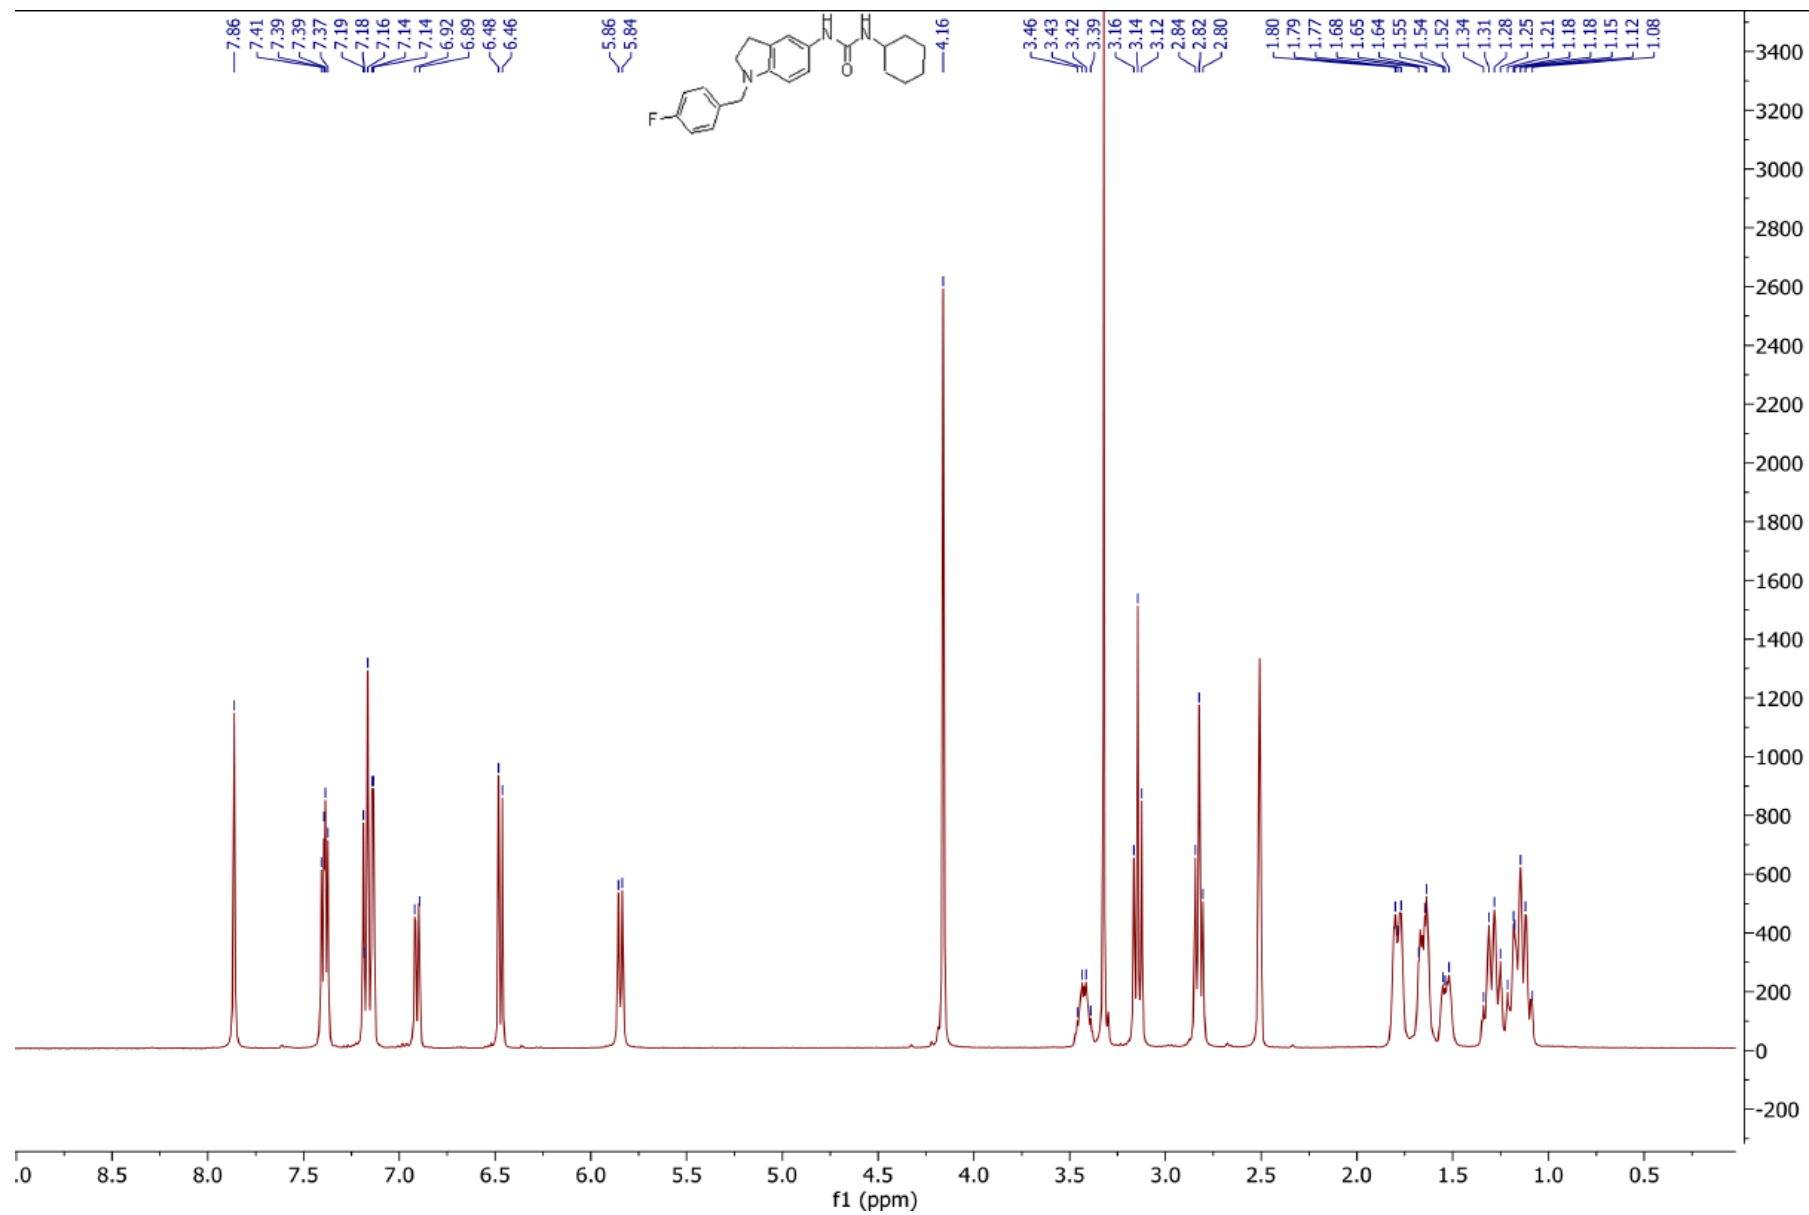

<sup>1</sup>H NMR of compound **5b**

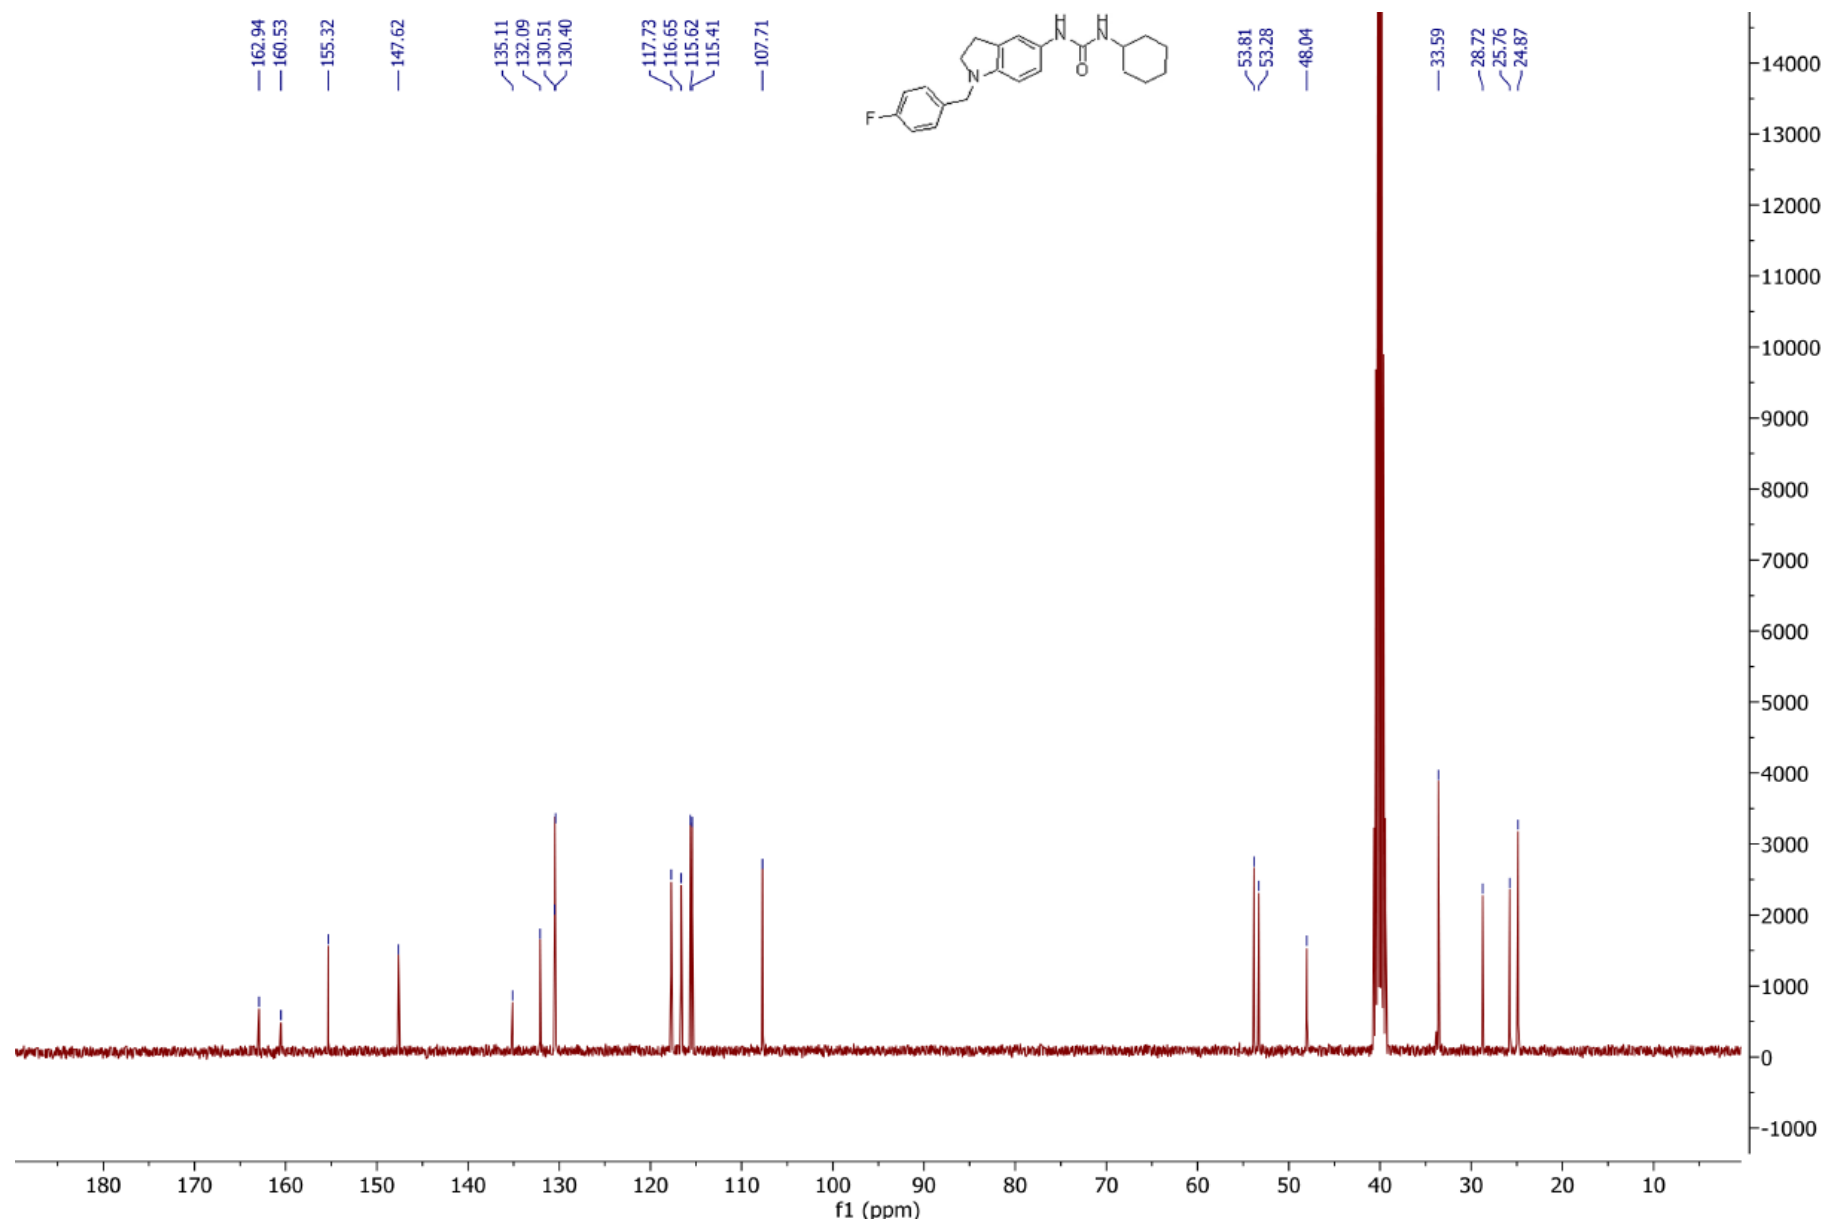

<sup>13</sup>C NMR of compound **5b**

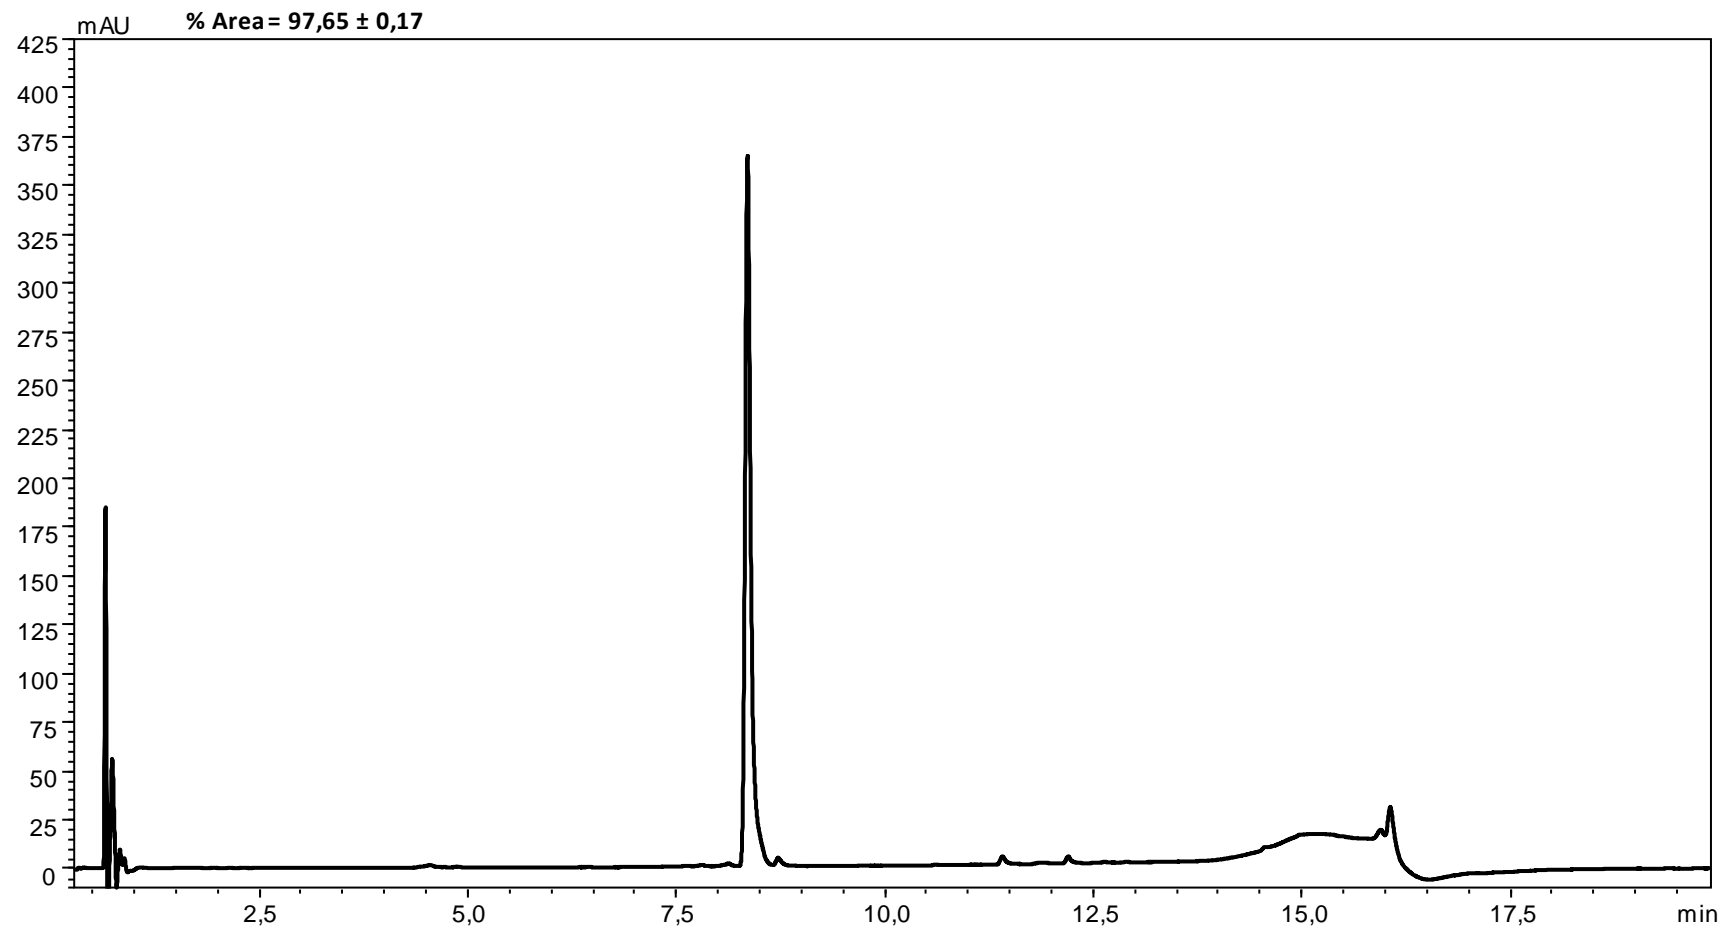

RP-HPLC trace of compound **5b**

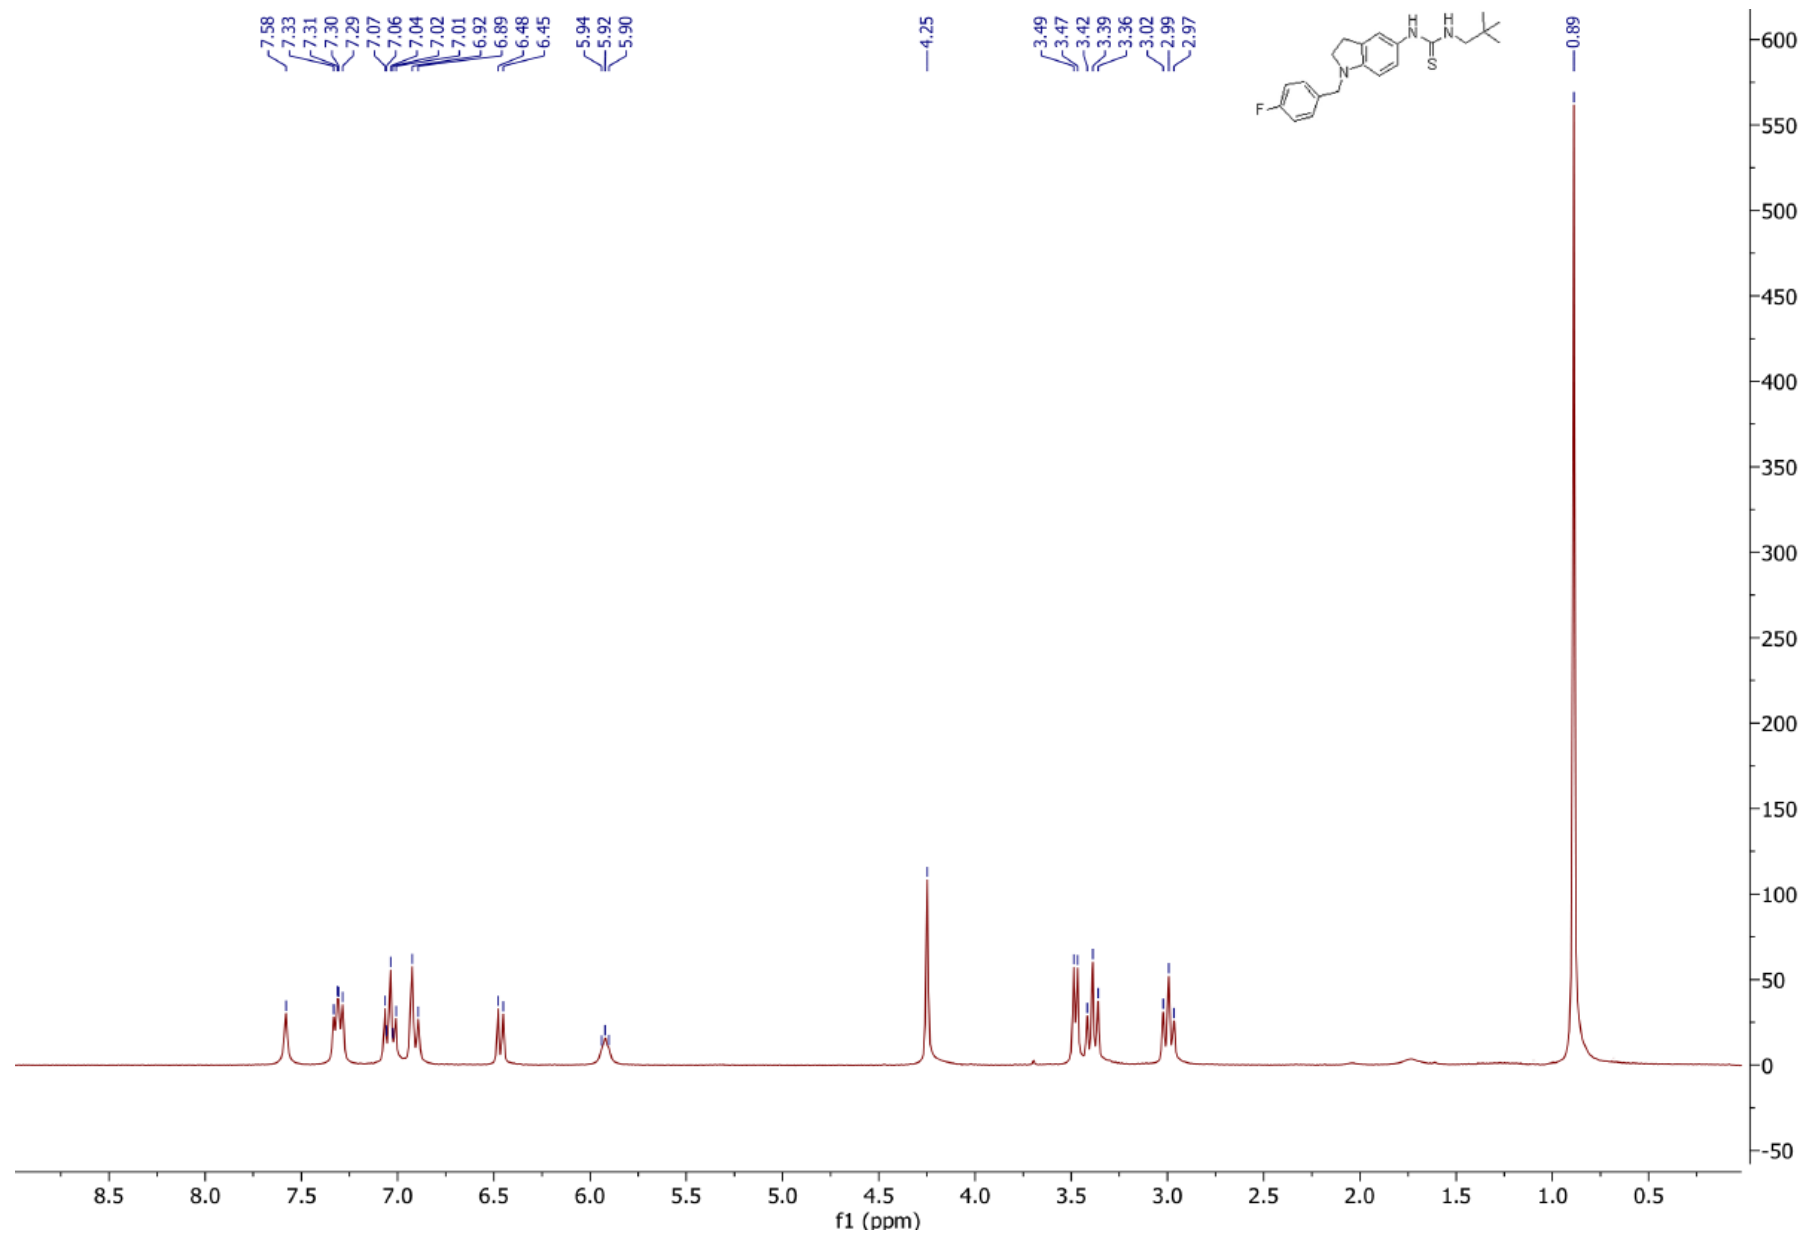

<sup>1</sup>H NMR of compound **6**

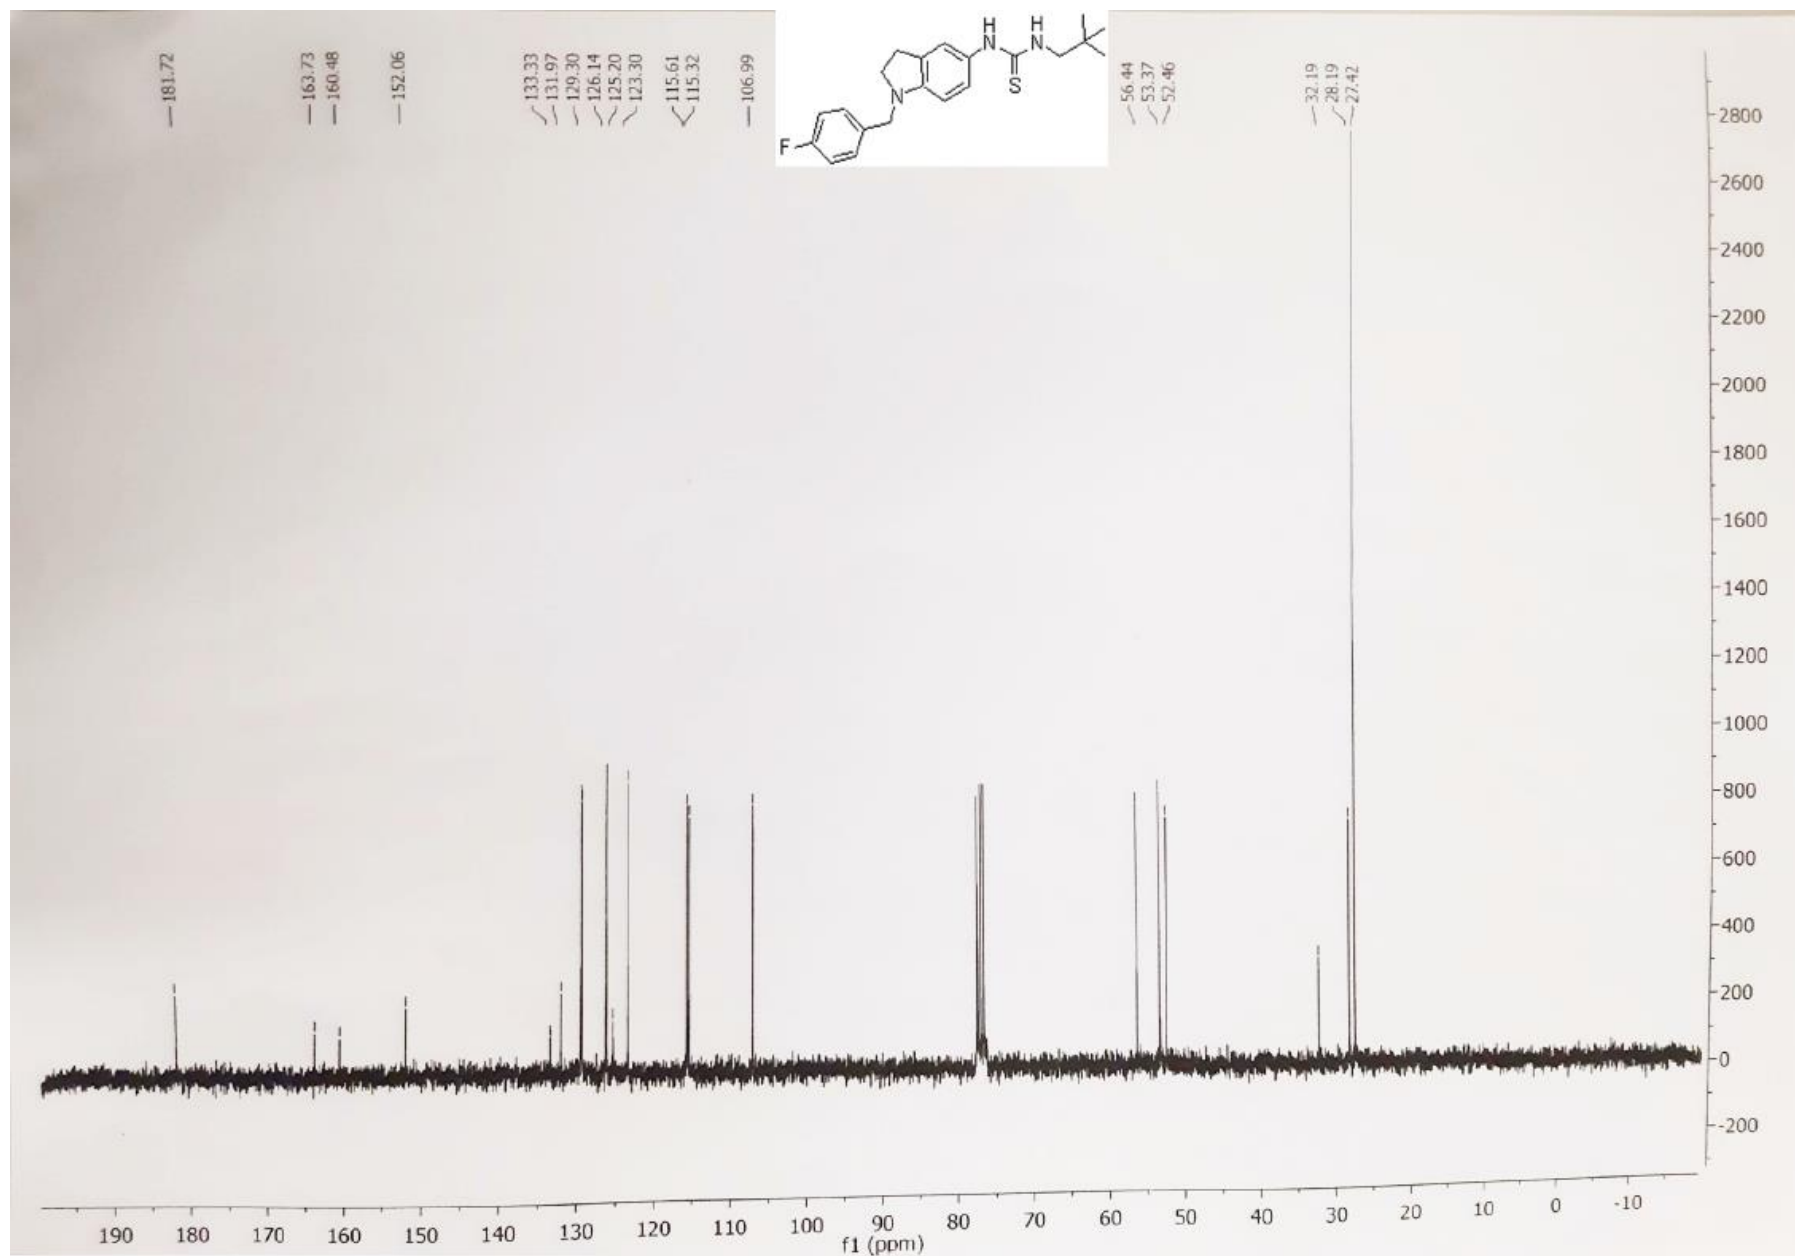

<sup>13</sup>C NMR of compound 6

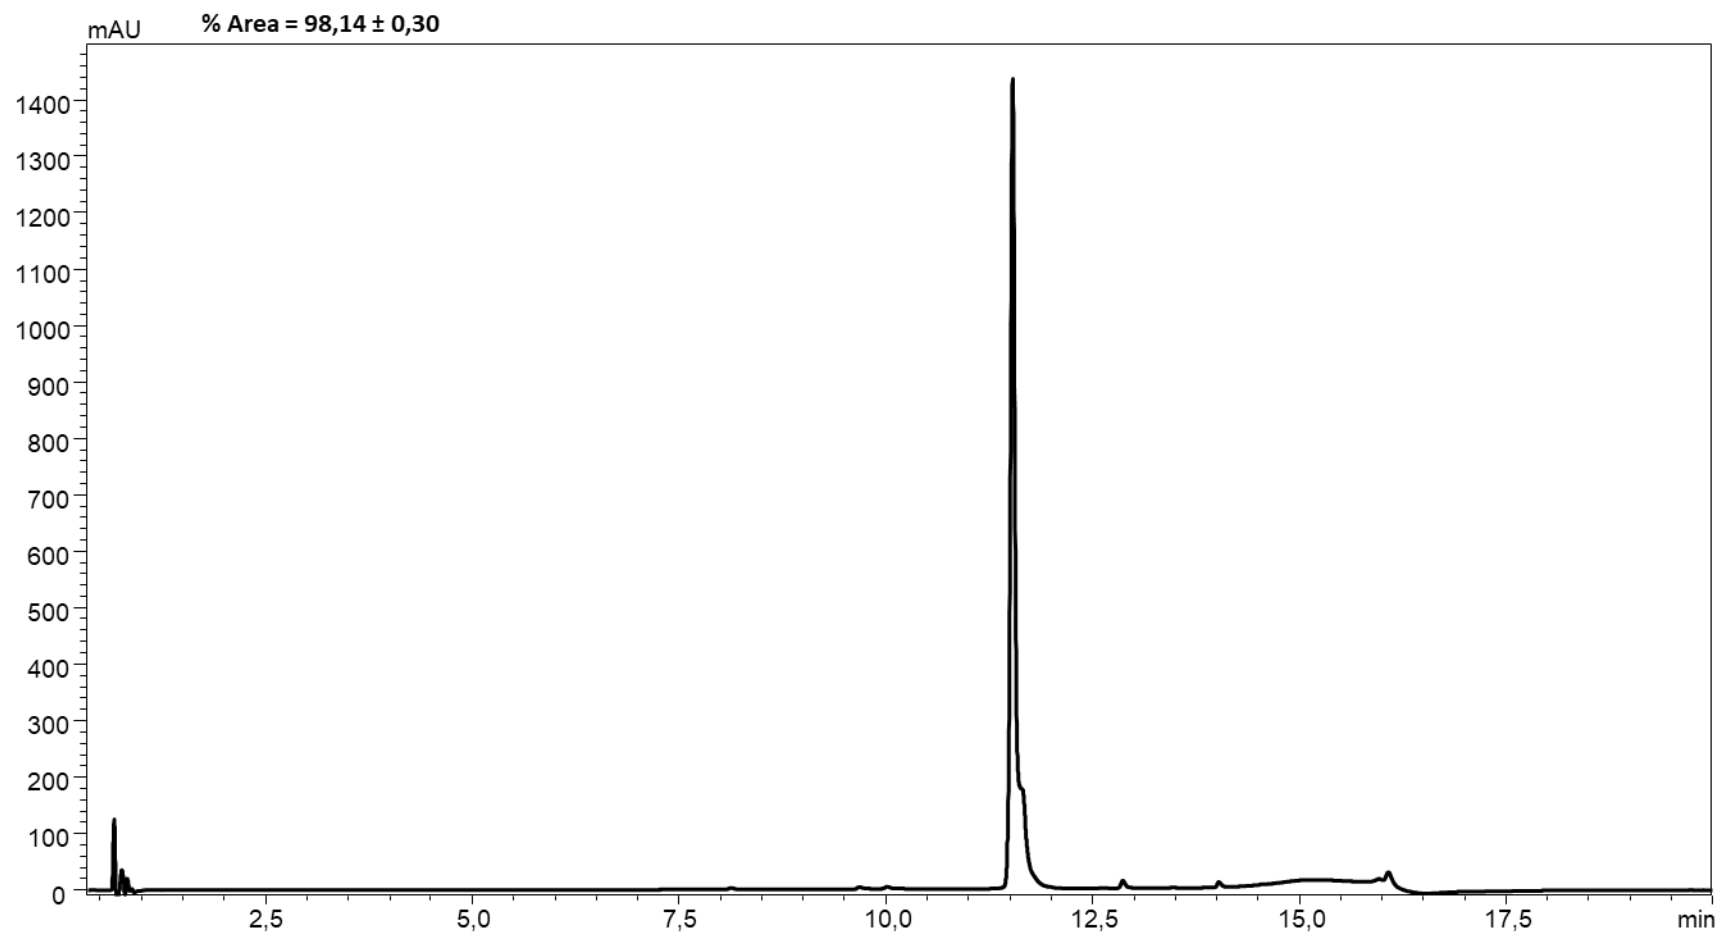

RP-HPLC trace of compound **6**

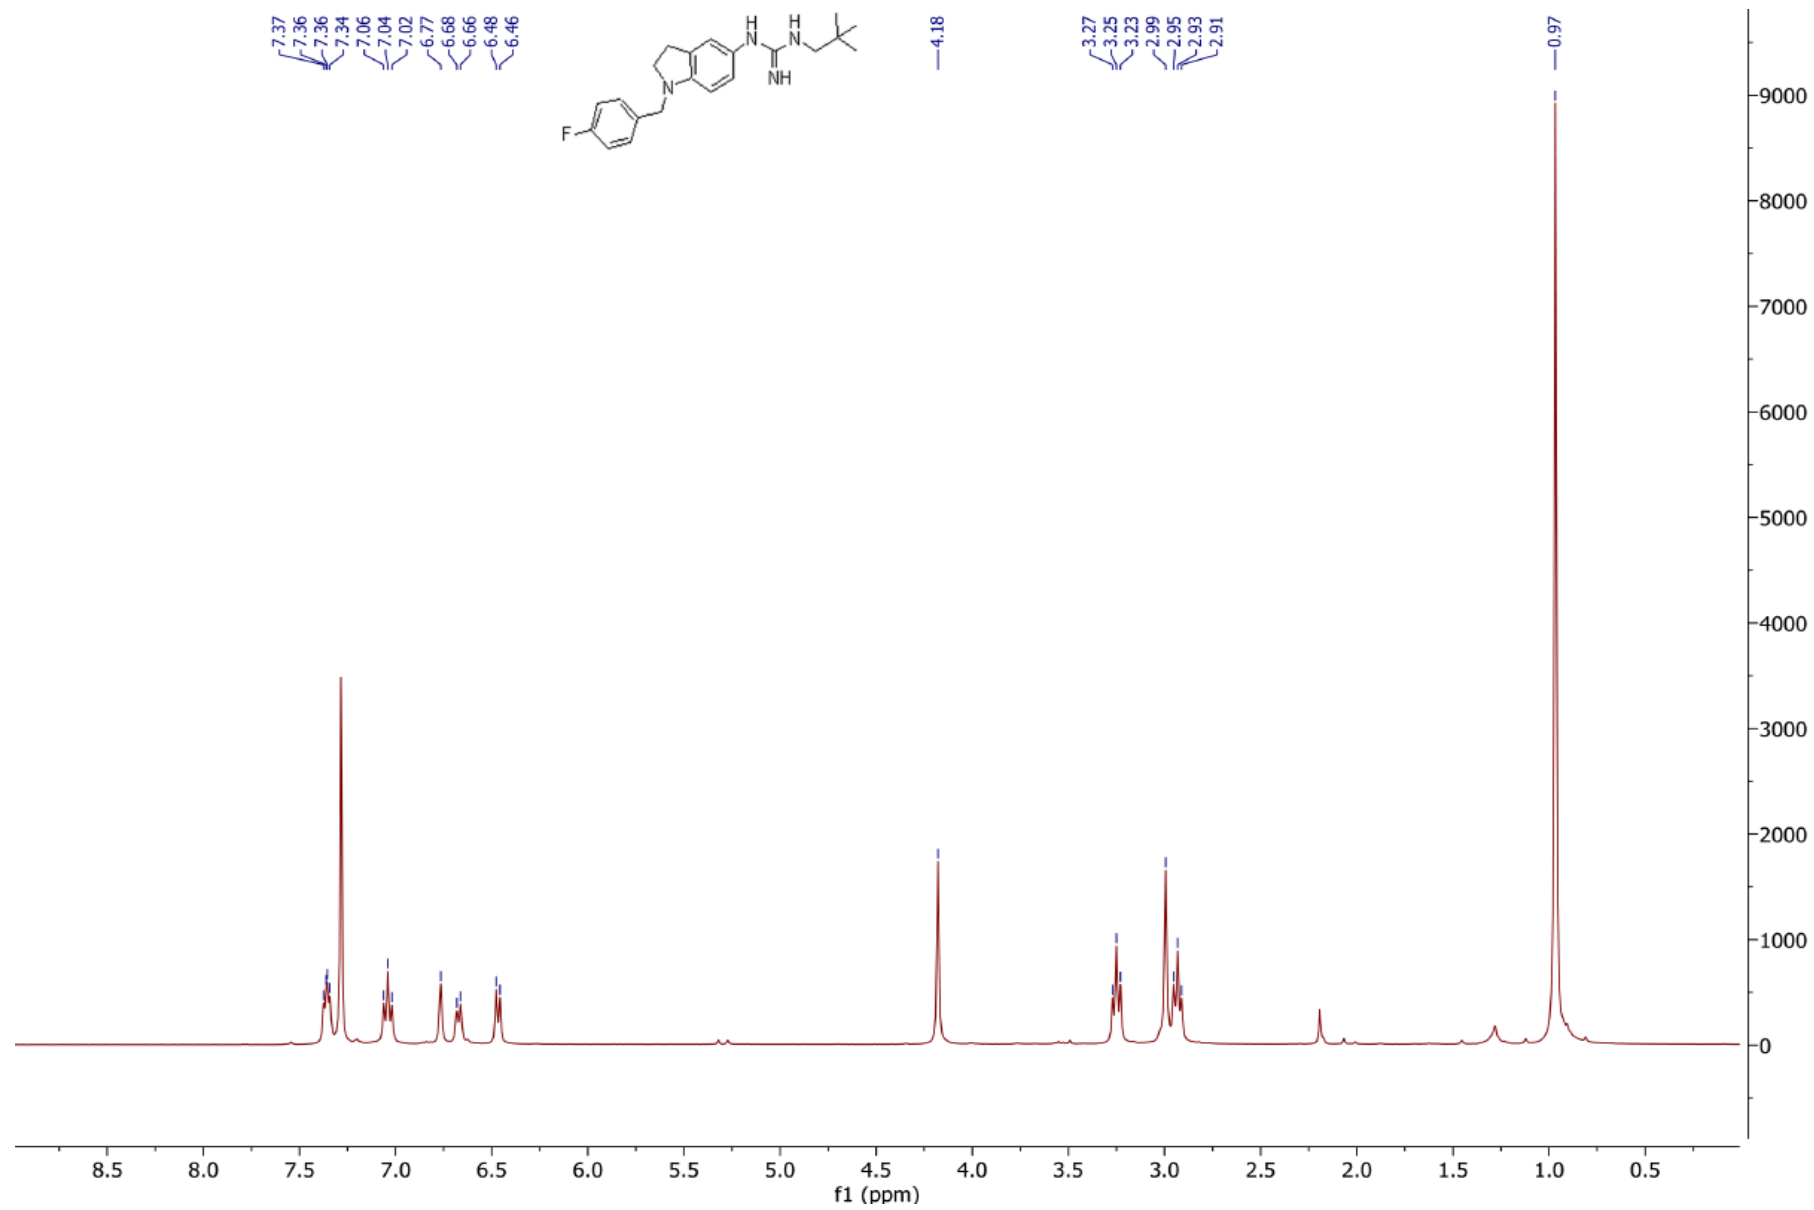

<sup>1</sup>H NMR of compound 7



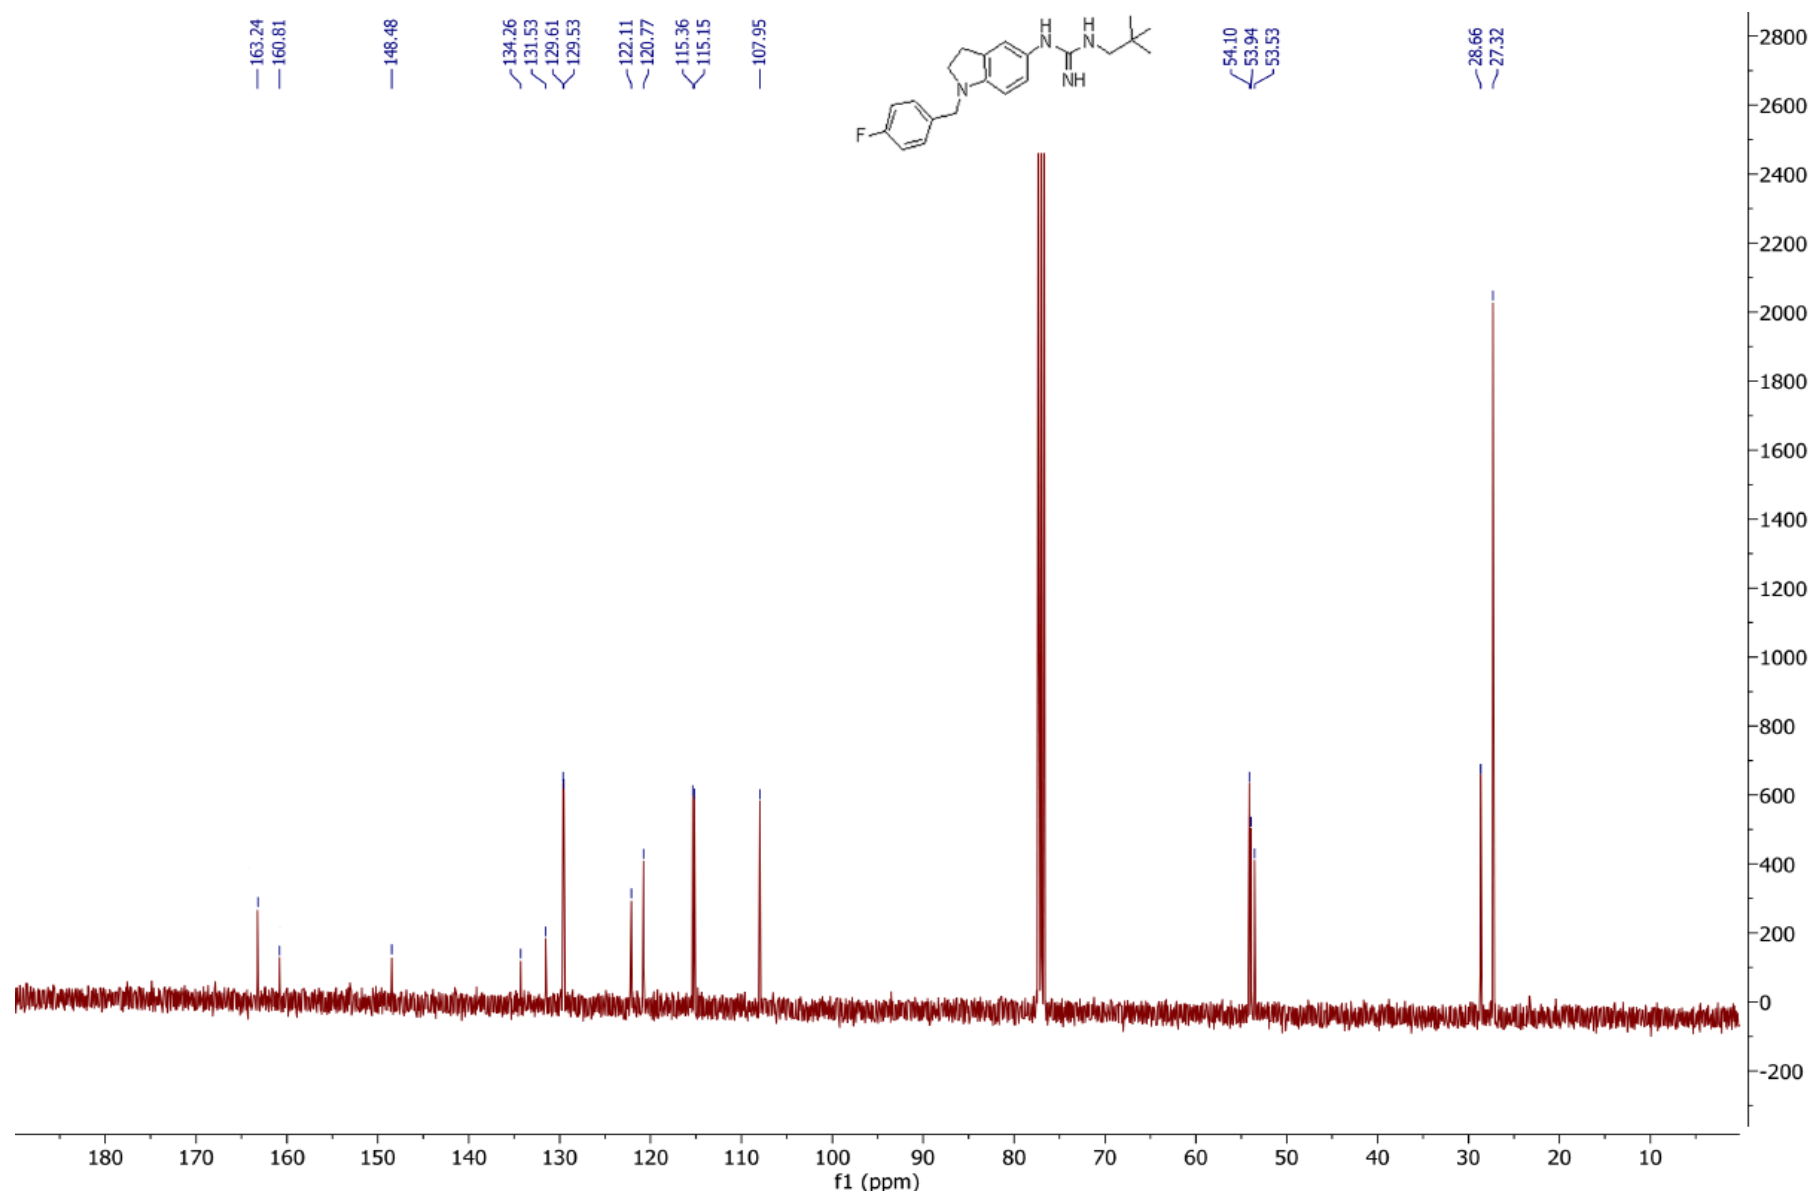

<sup>13</sup>C NMR of compound 7

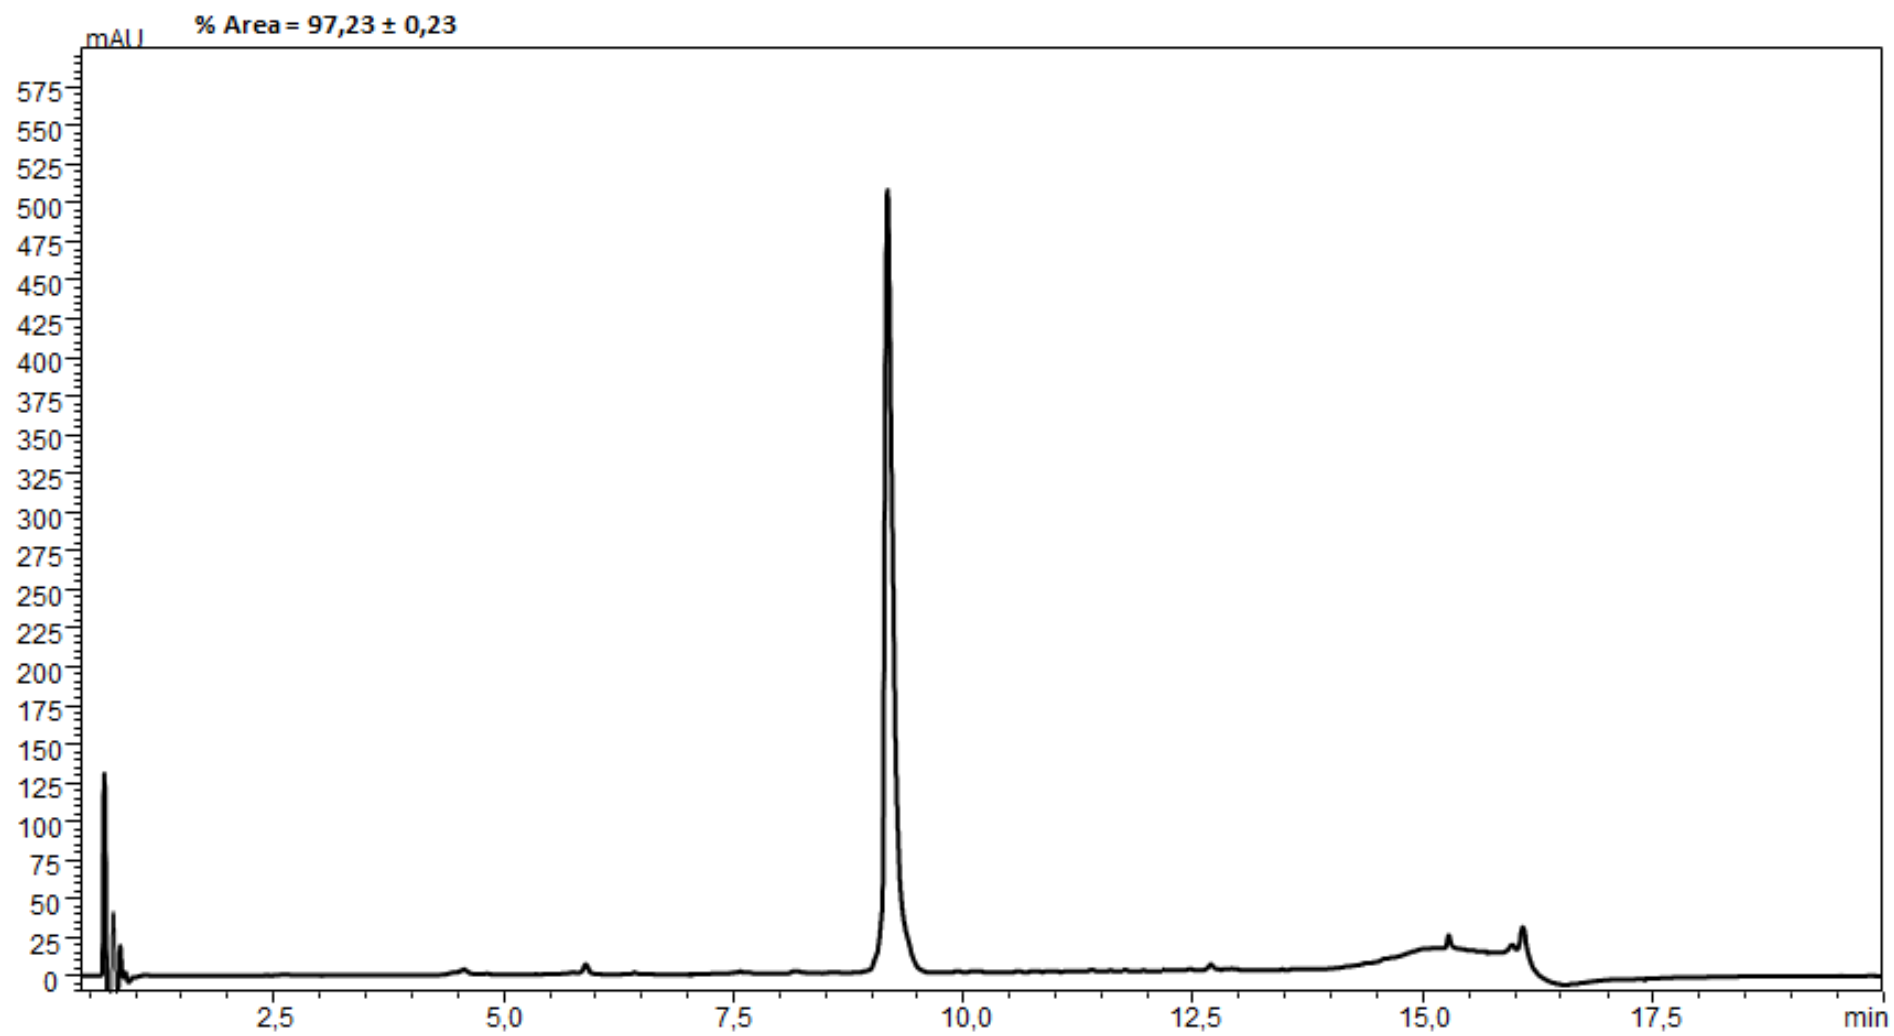

RP-HPLC trace of compound **7**

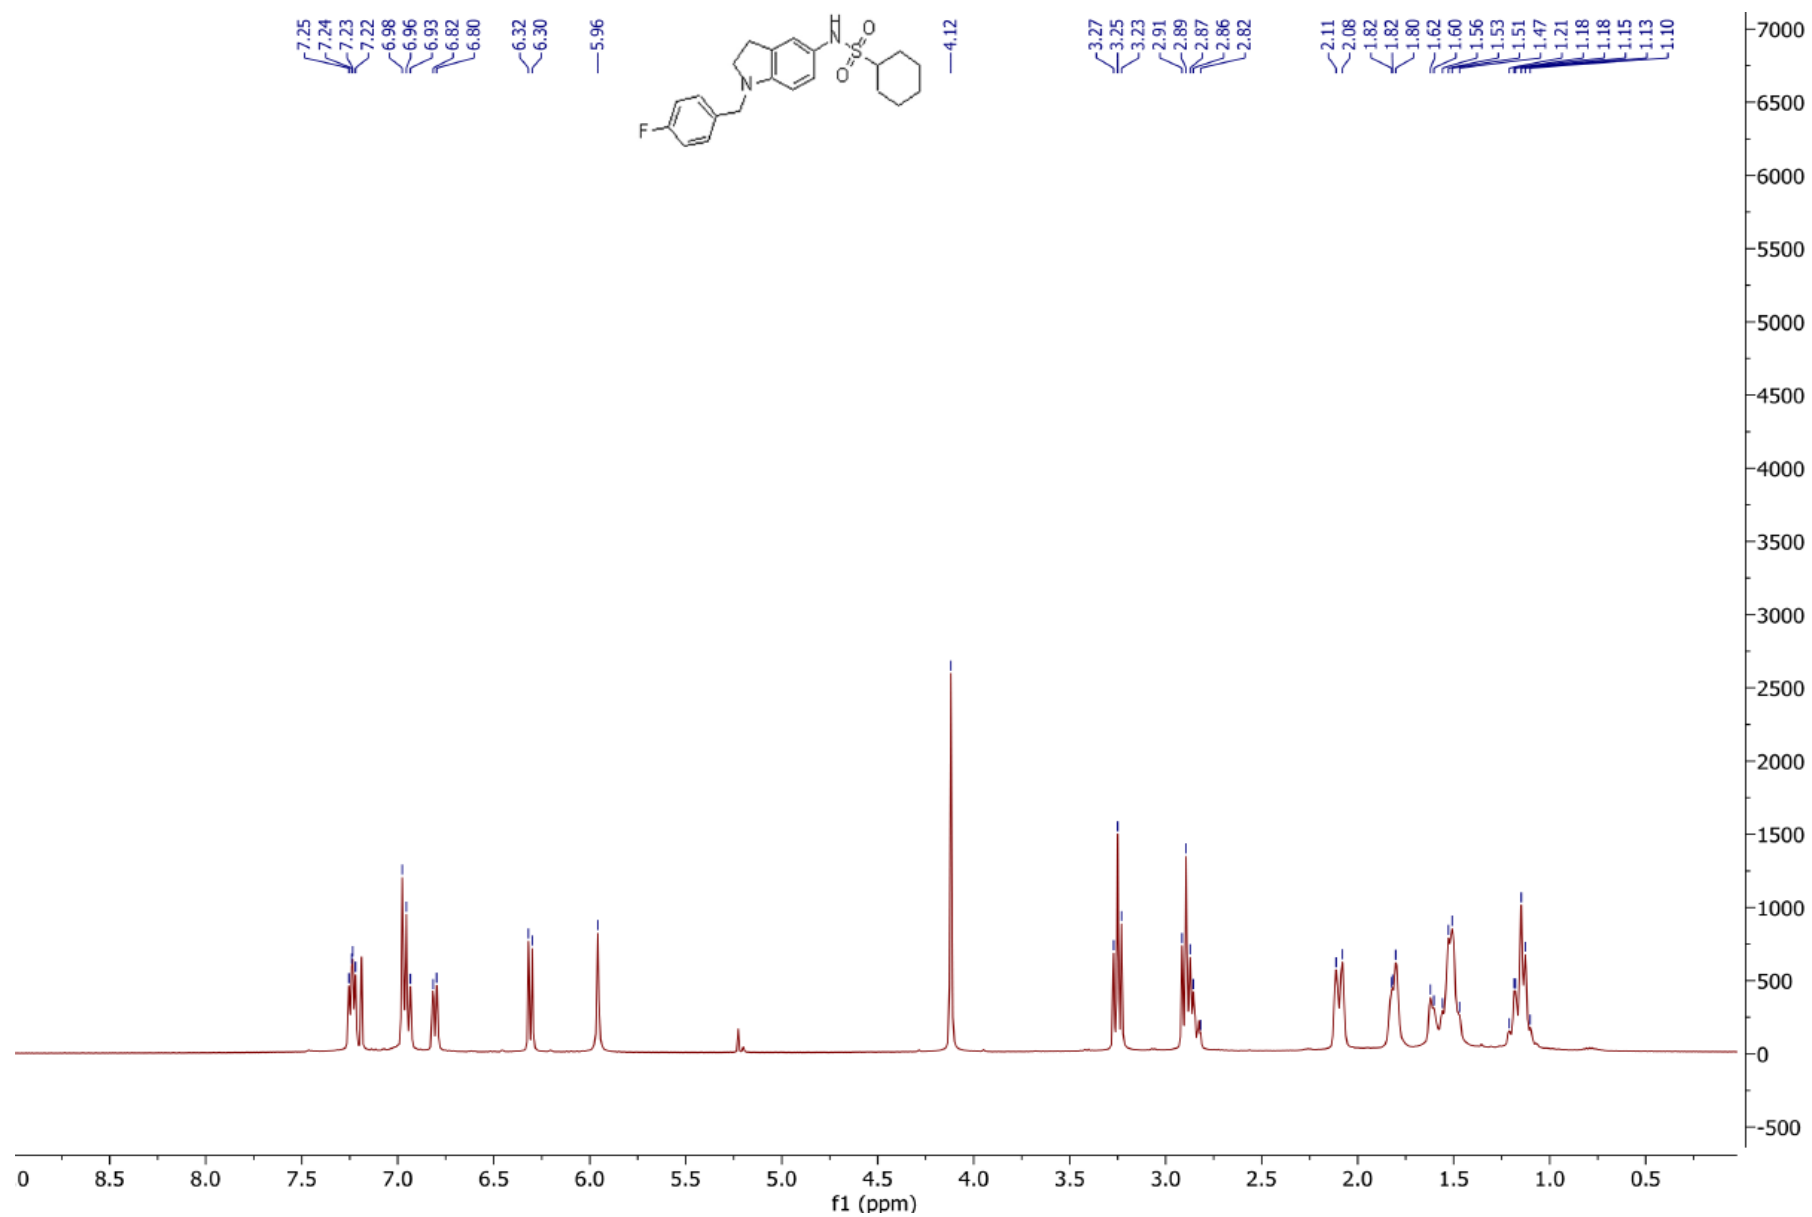

<sup>1</sup>H NMR of compound **8a**

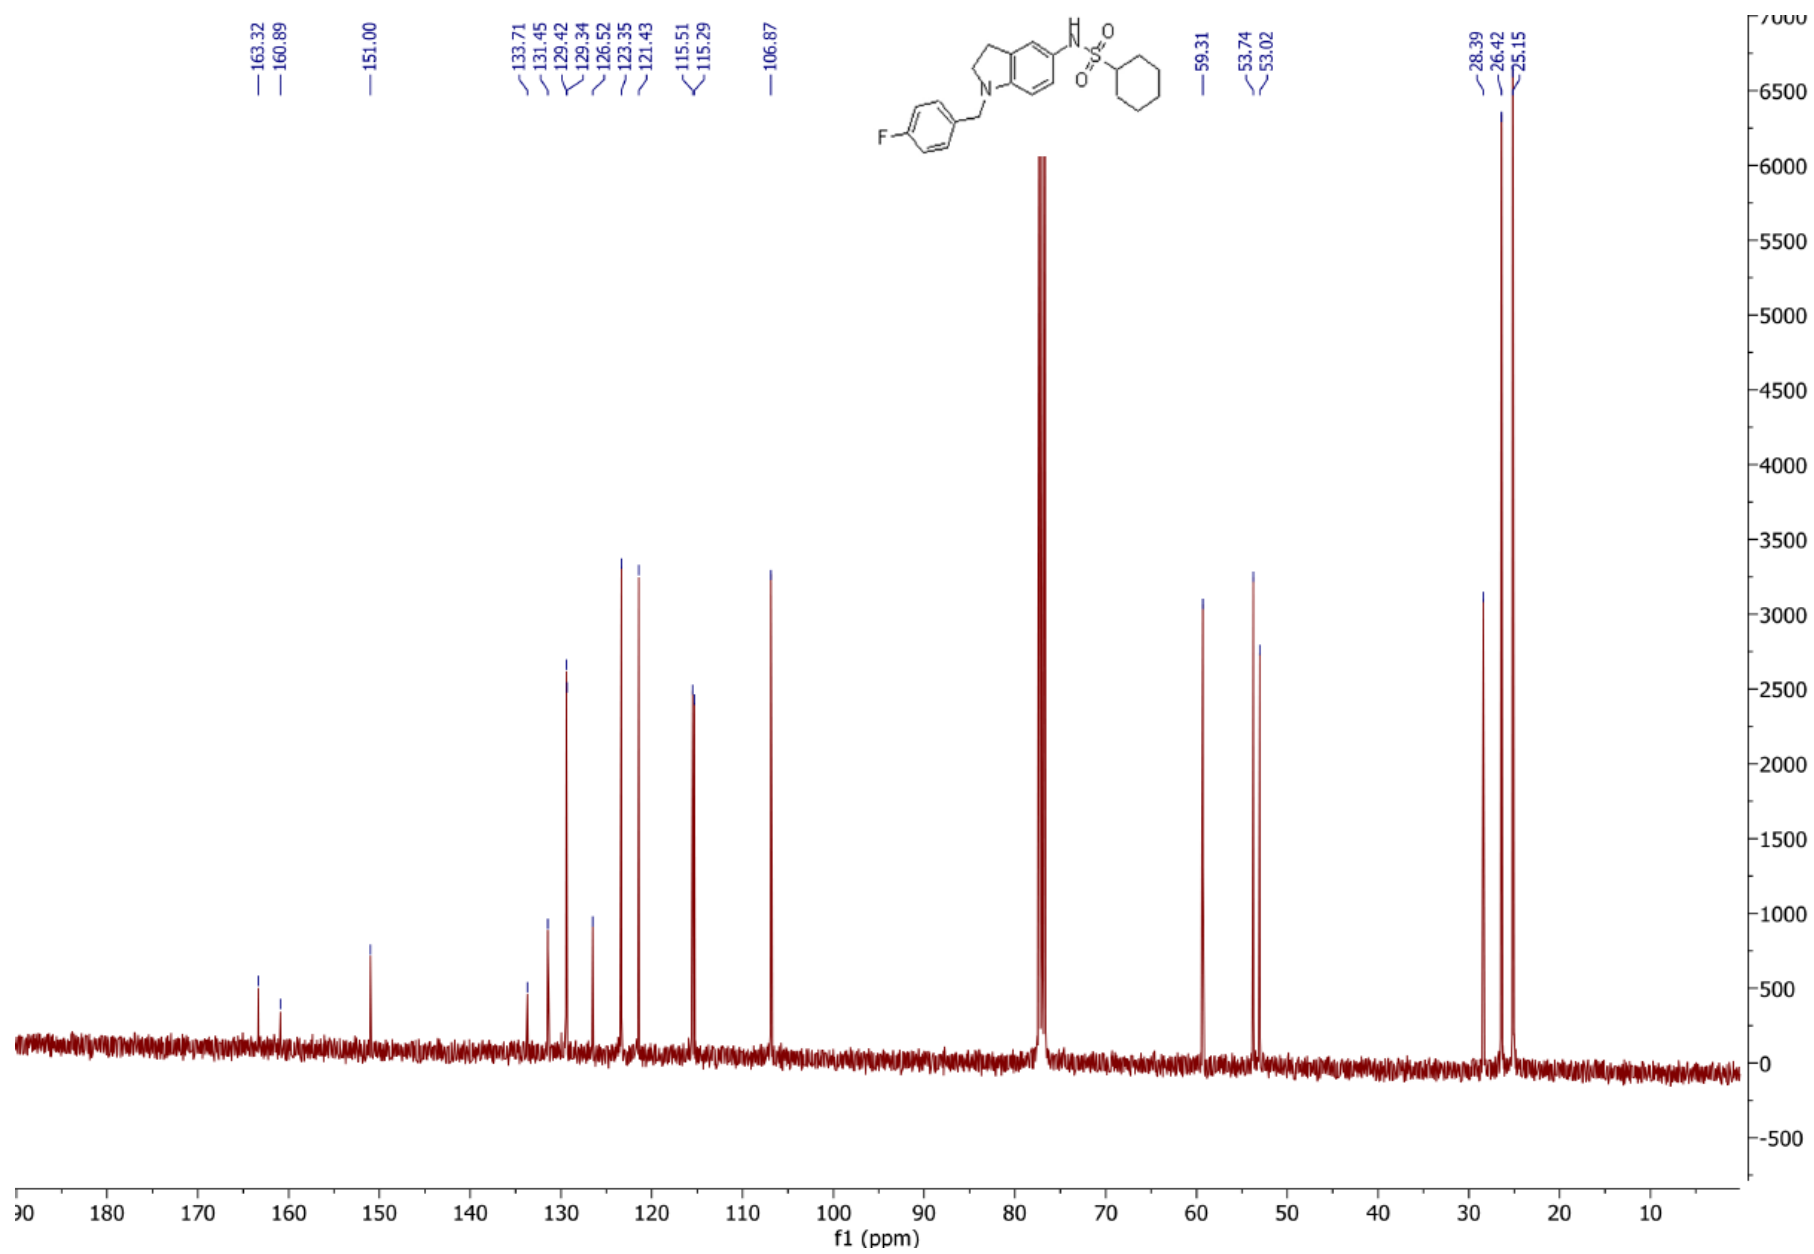

<sup>13</sup>C NMR of compound **8a**

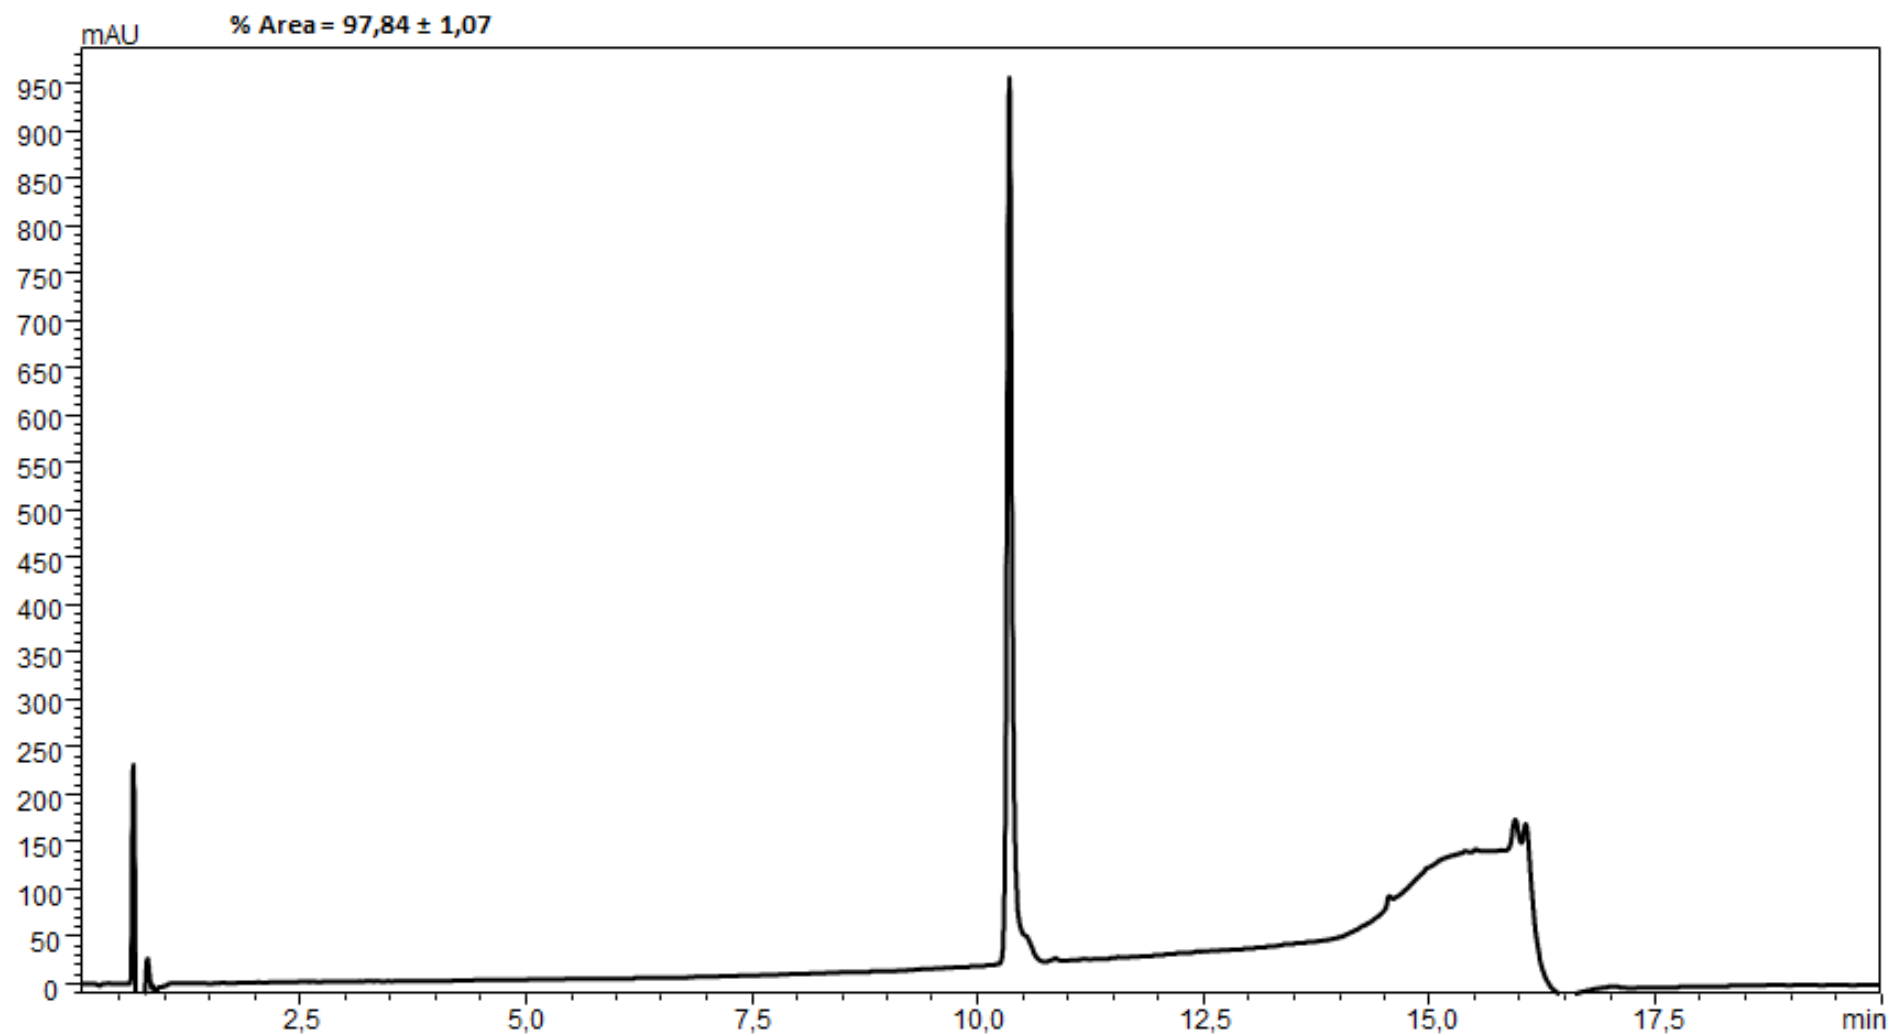

RP-HPLC trace of compound **8a**

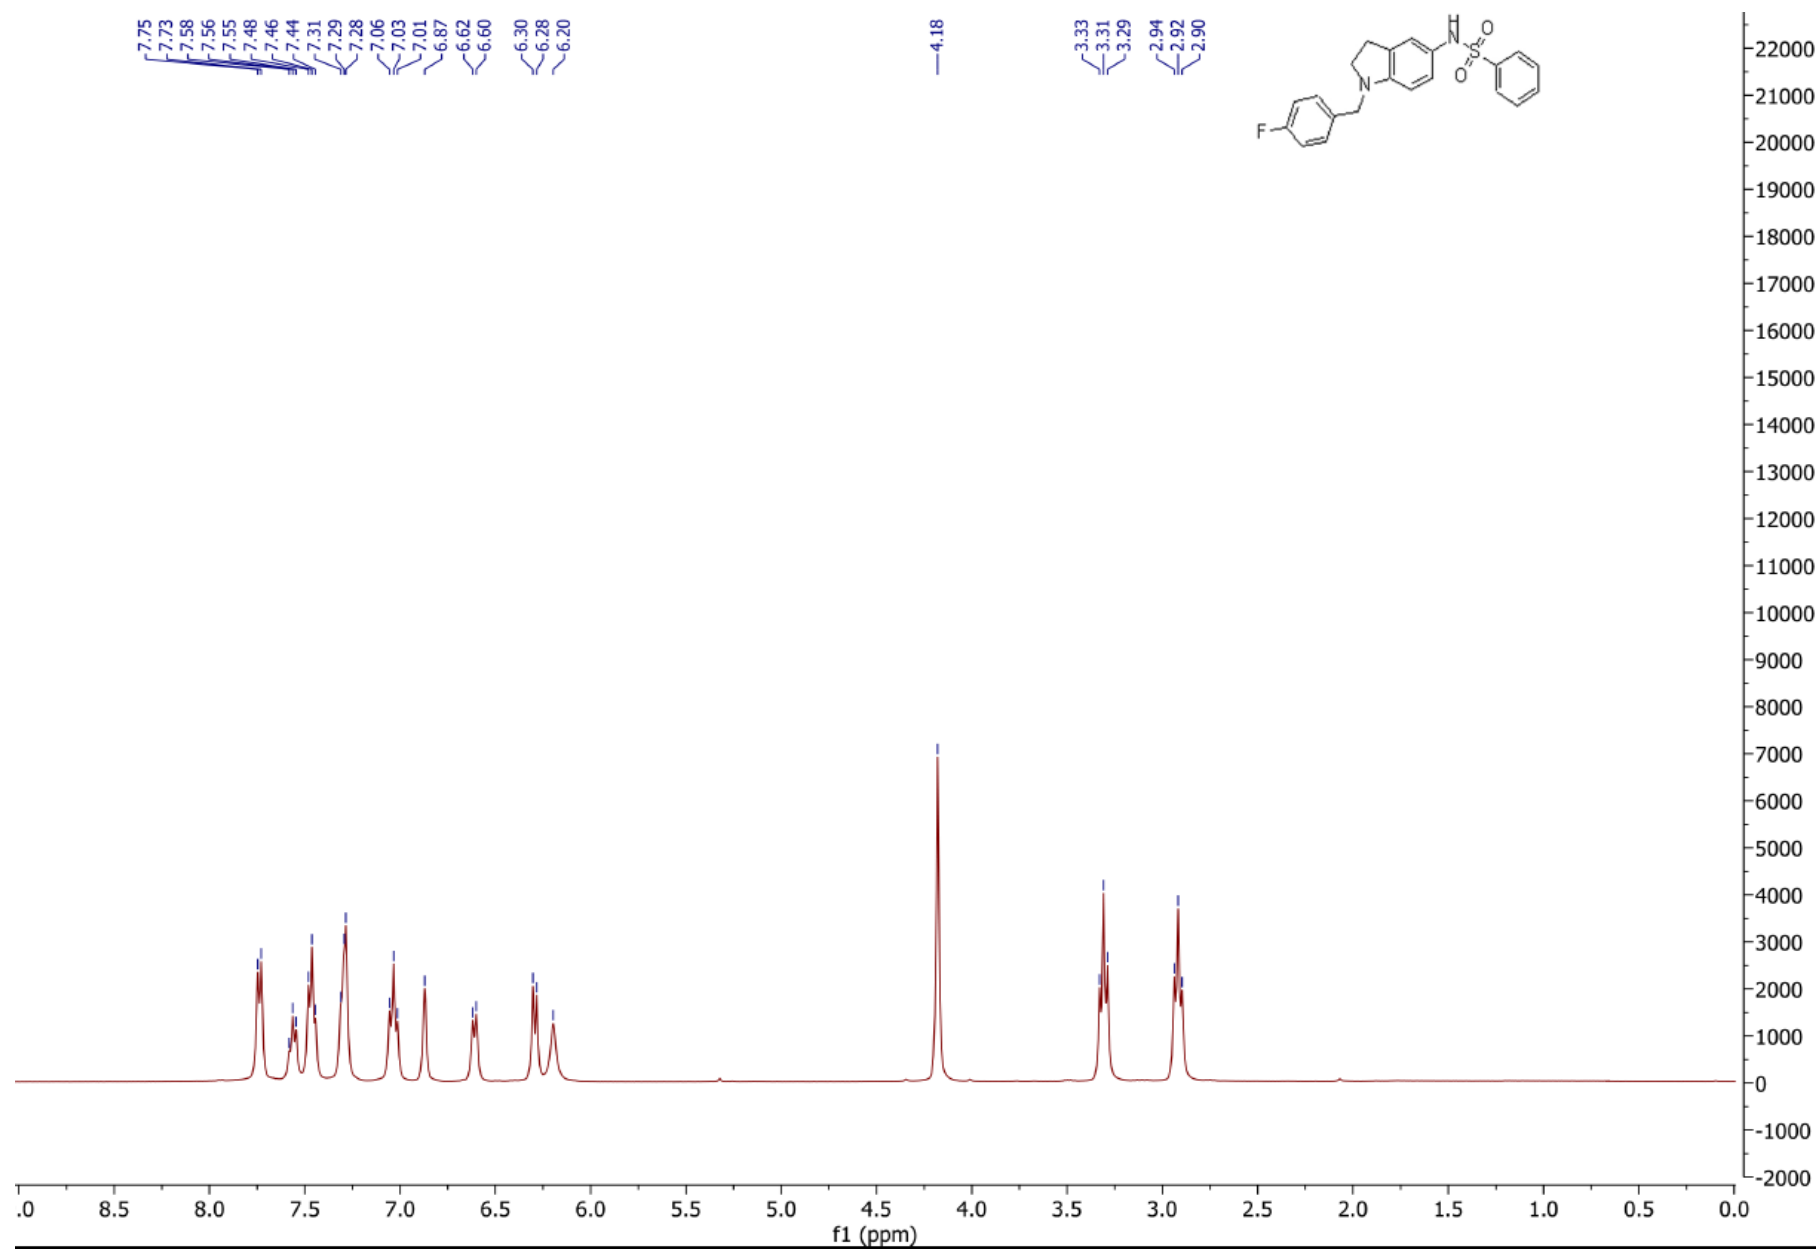

<sup>1</sup>H NMR of compound **8b**

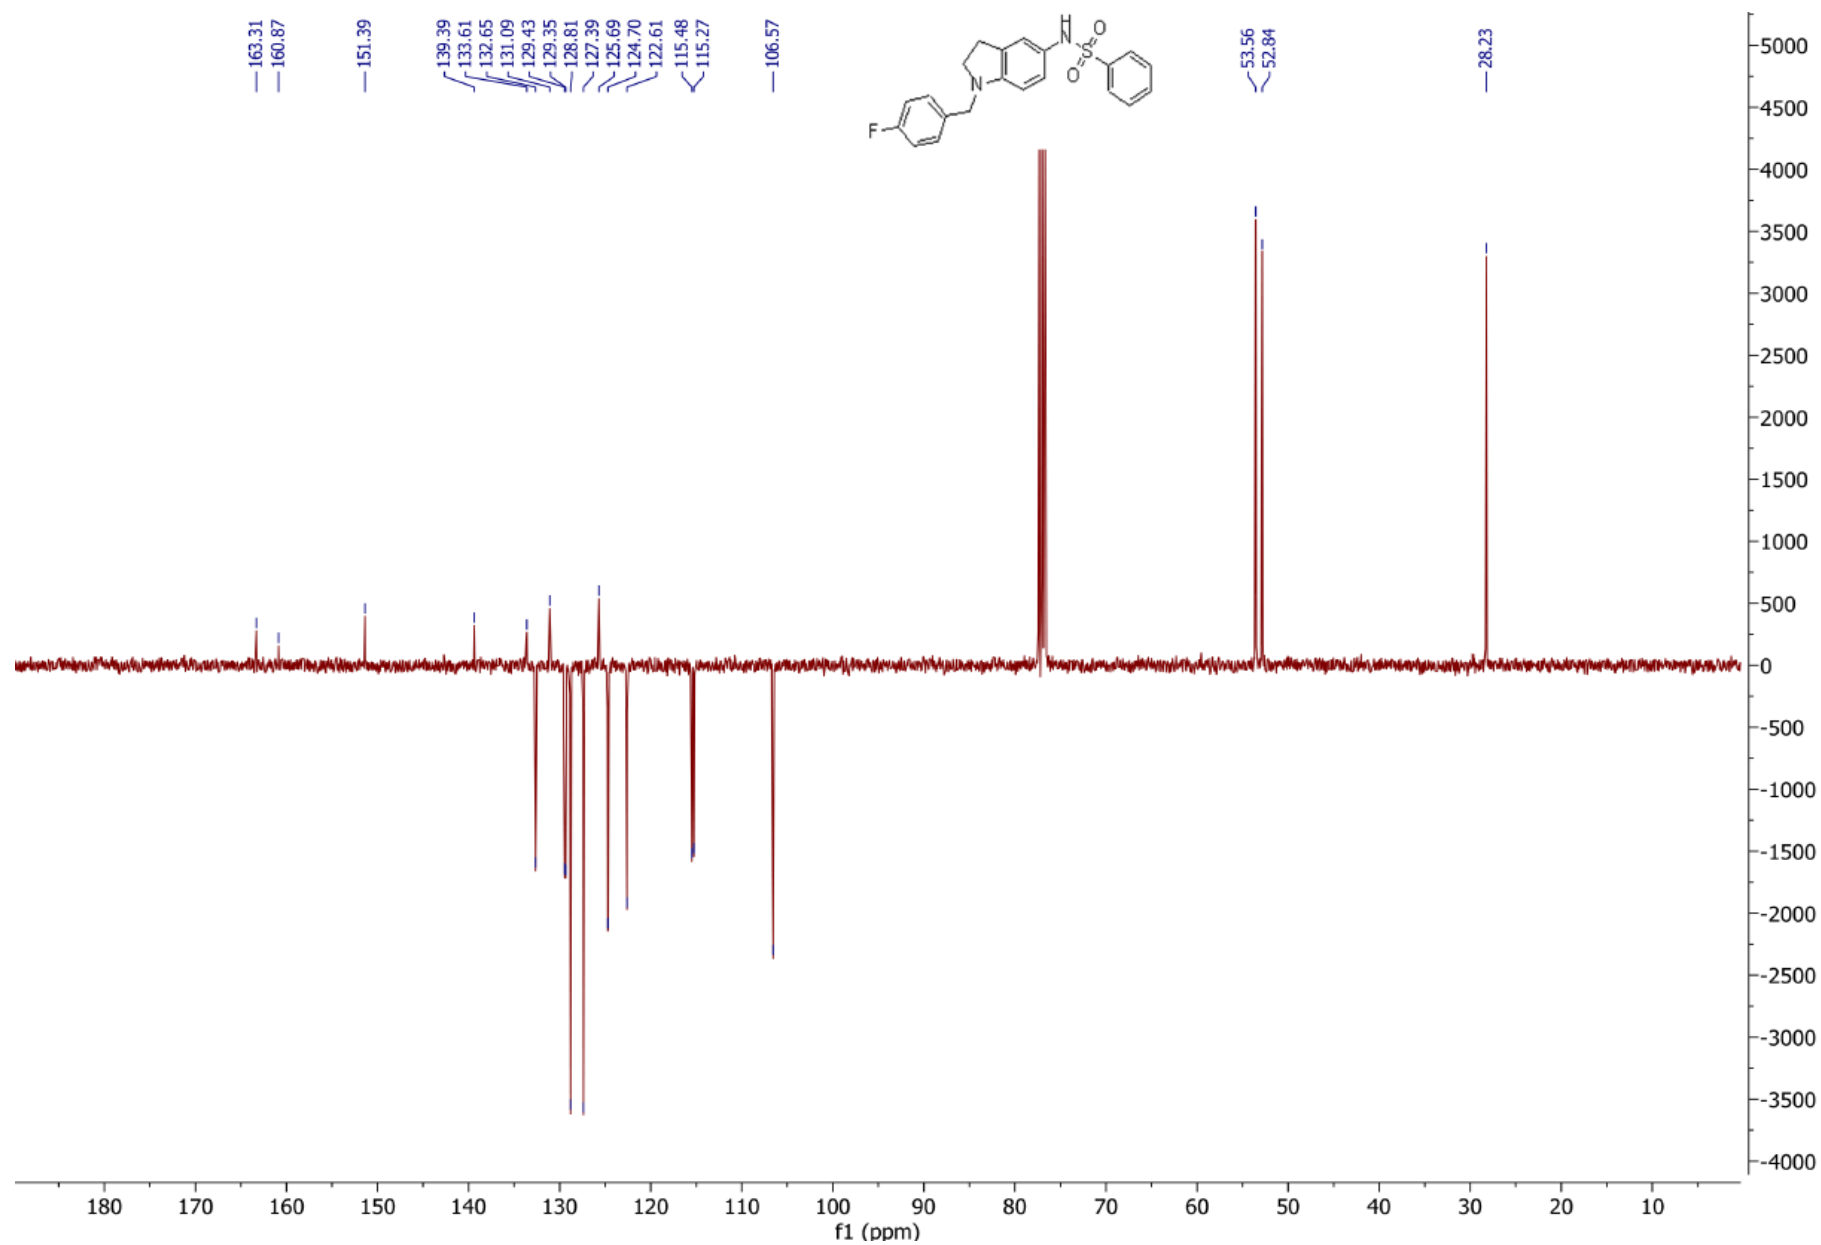

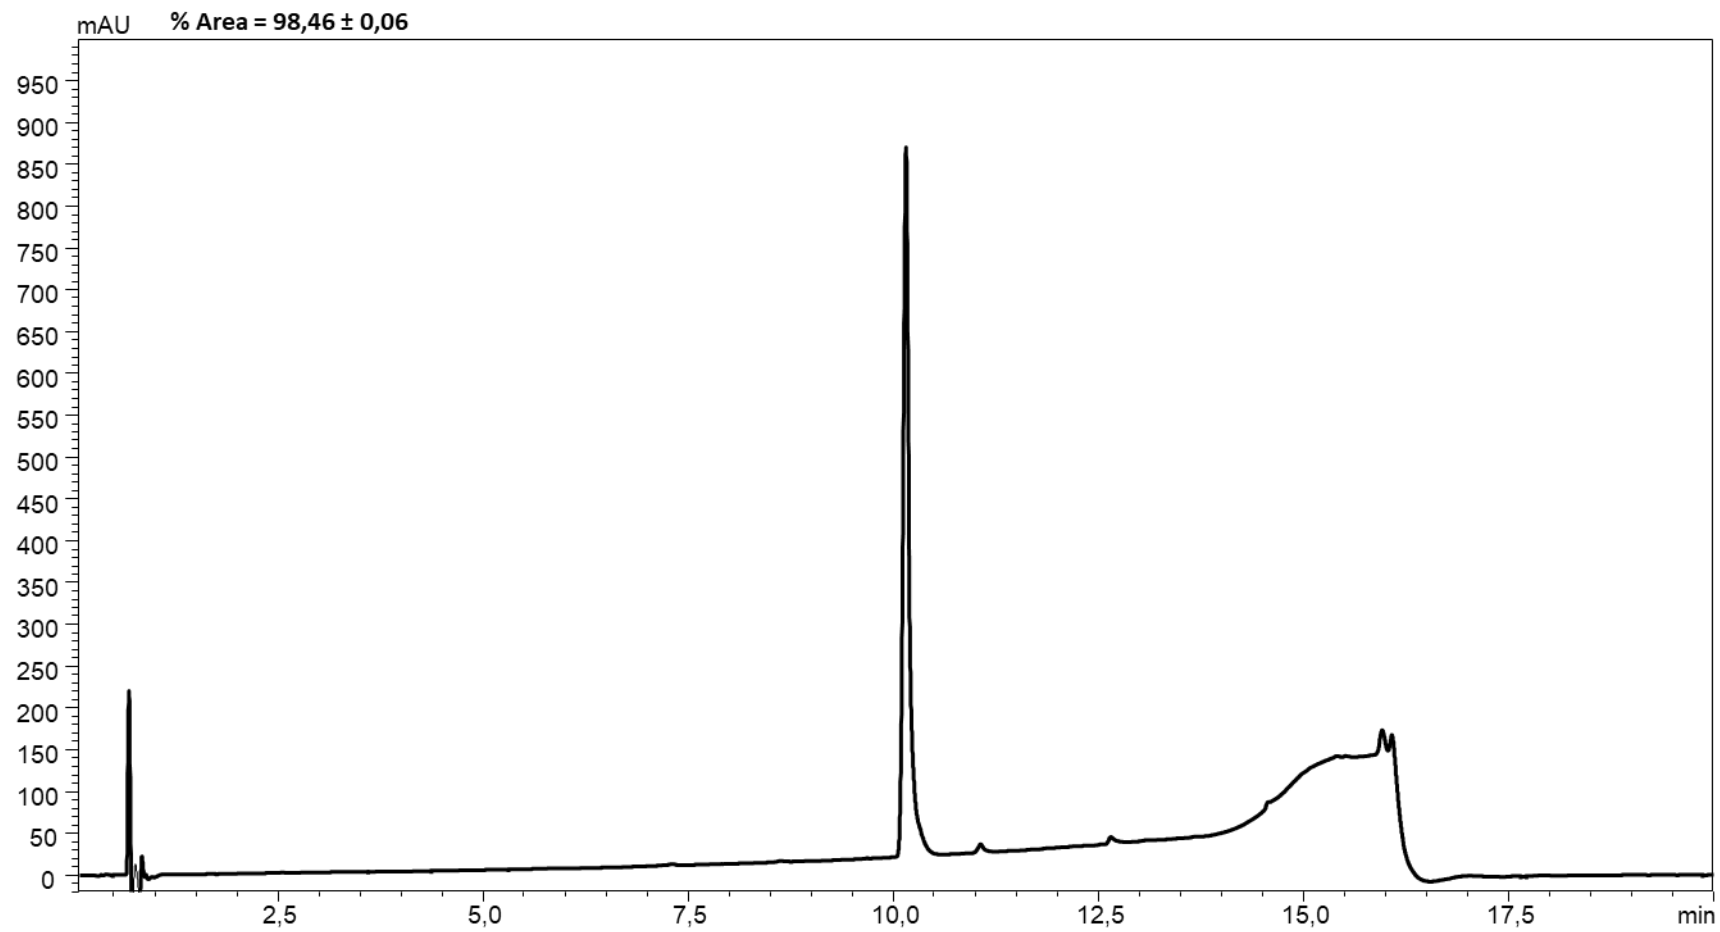

RP-HPLC trace of compound **8b**



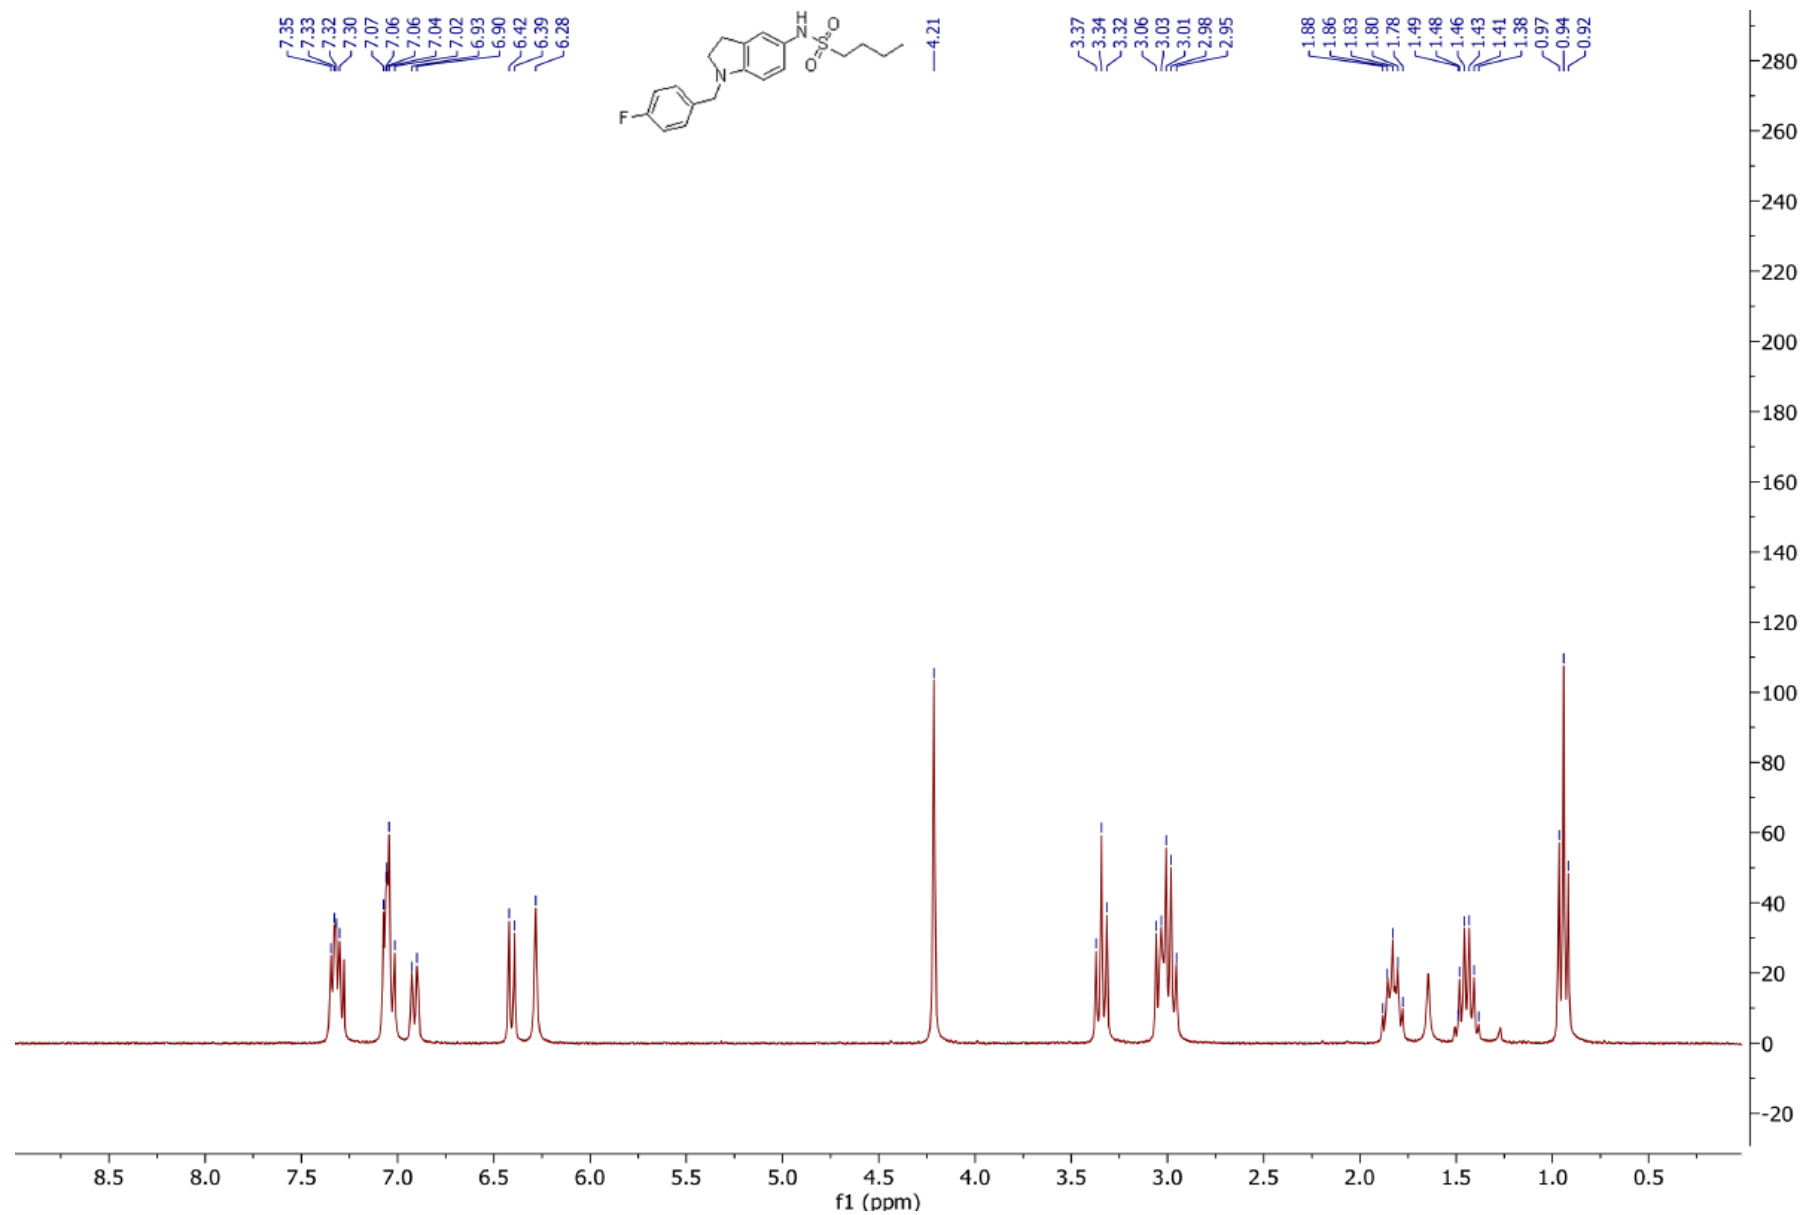

<sup>1</sup>H NMR of compound **8c**

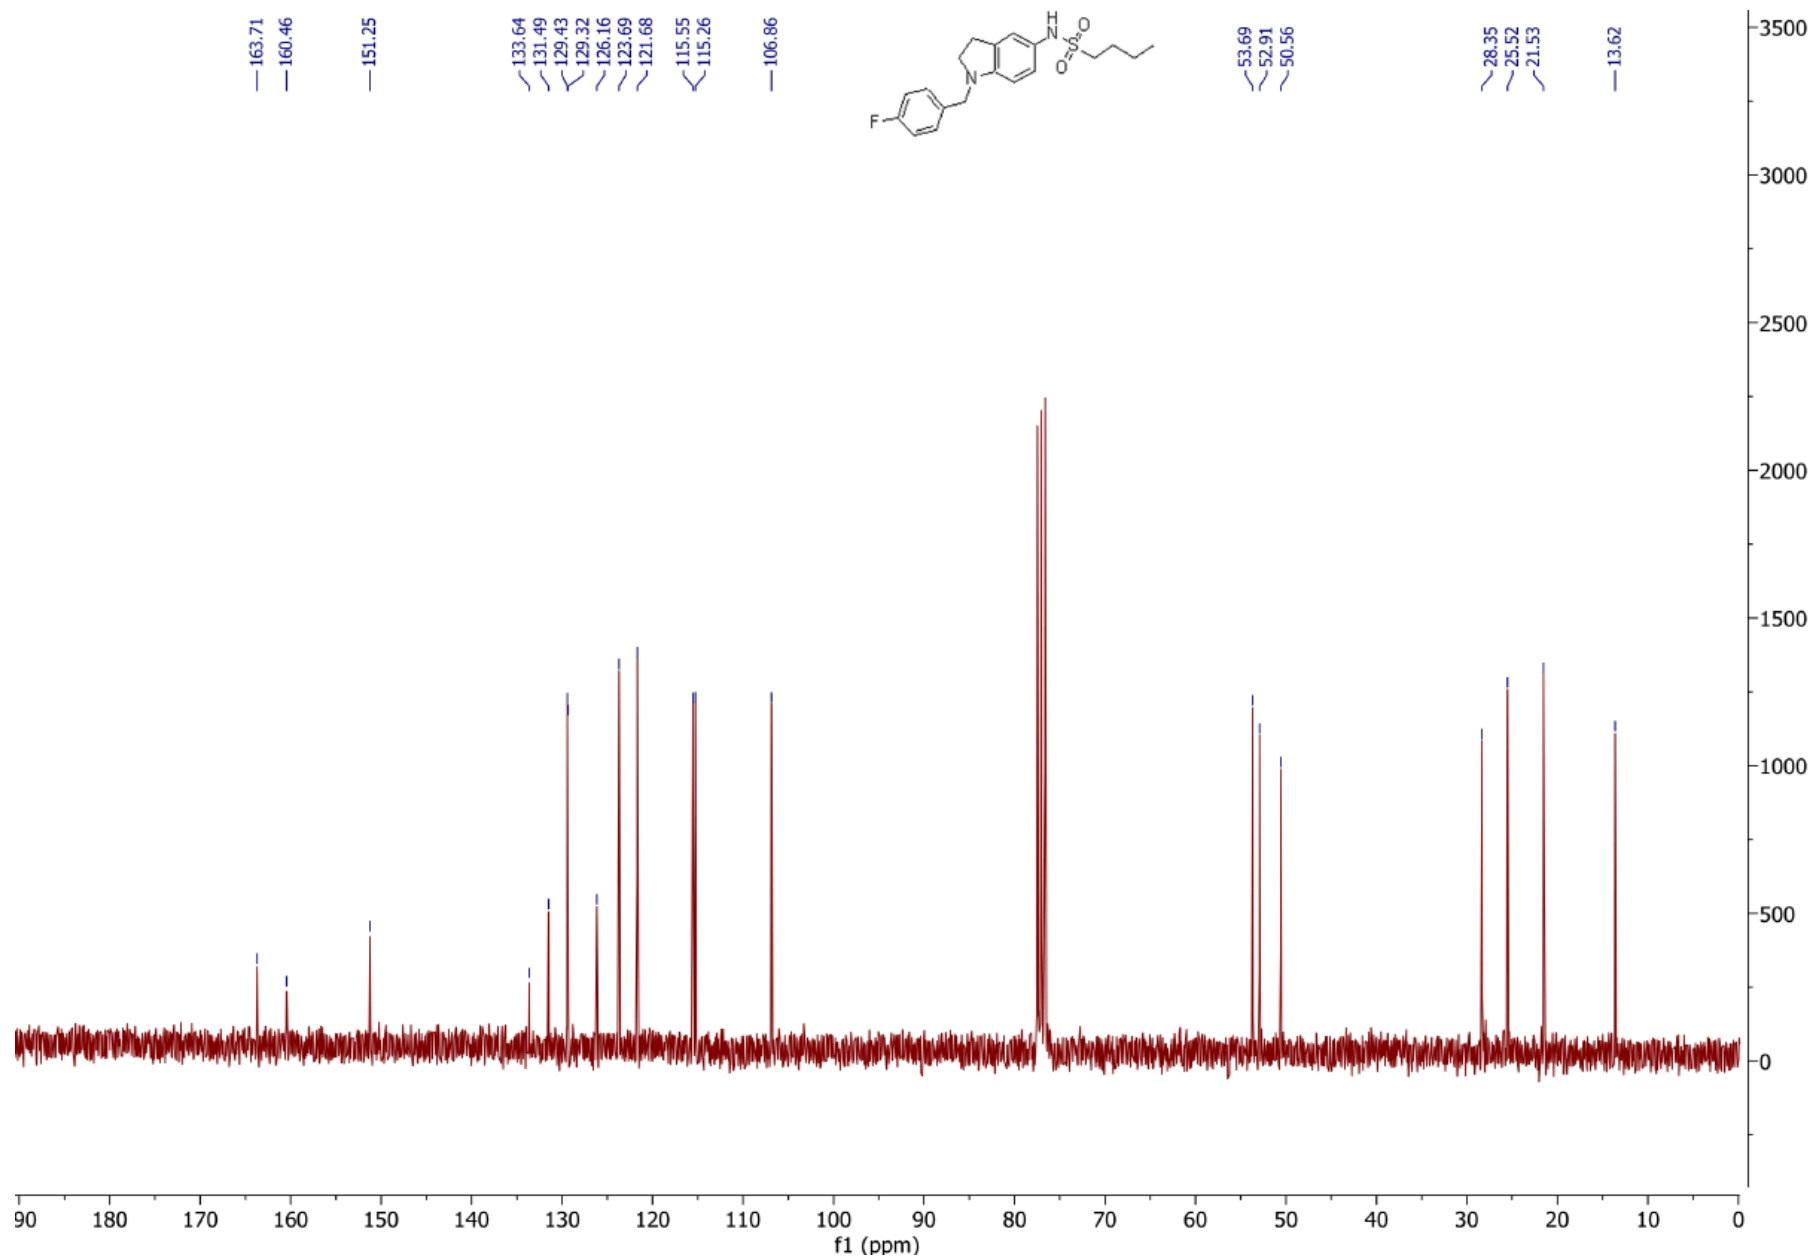

**13C NMR of compound 8c**

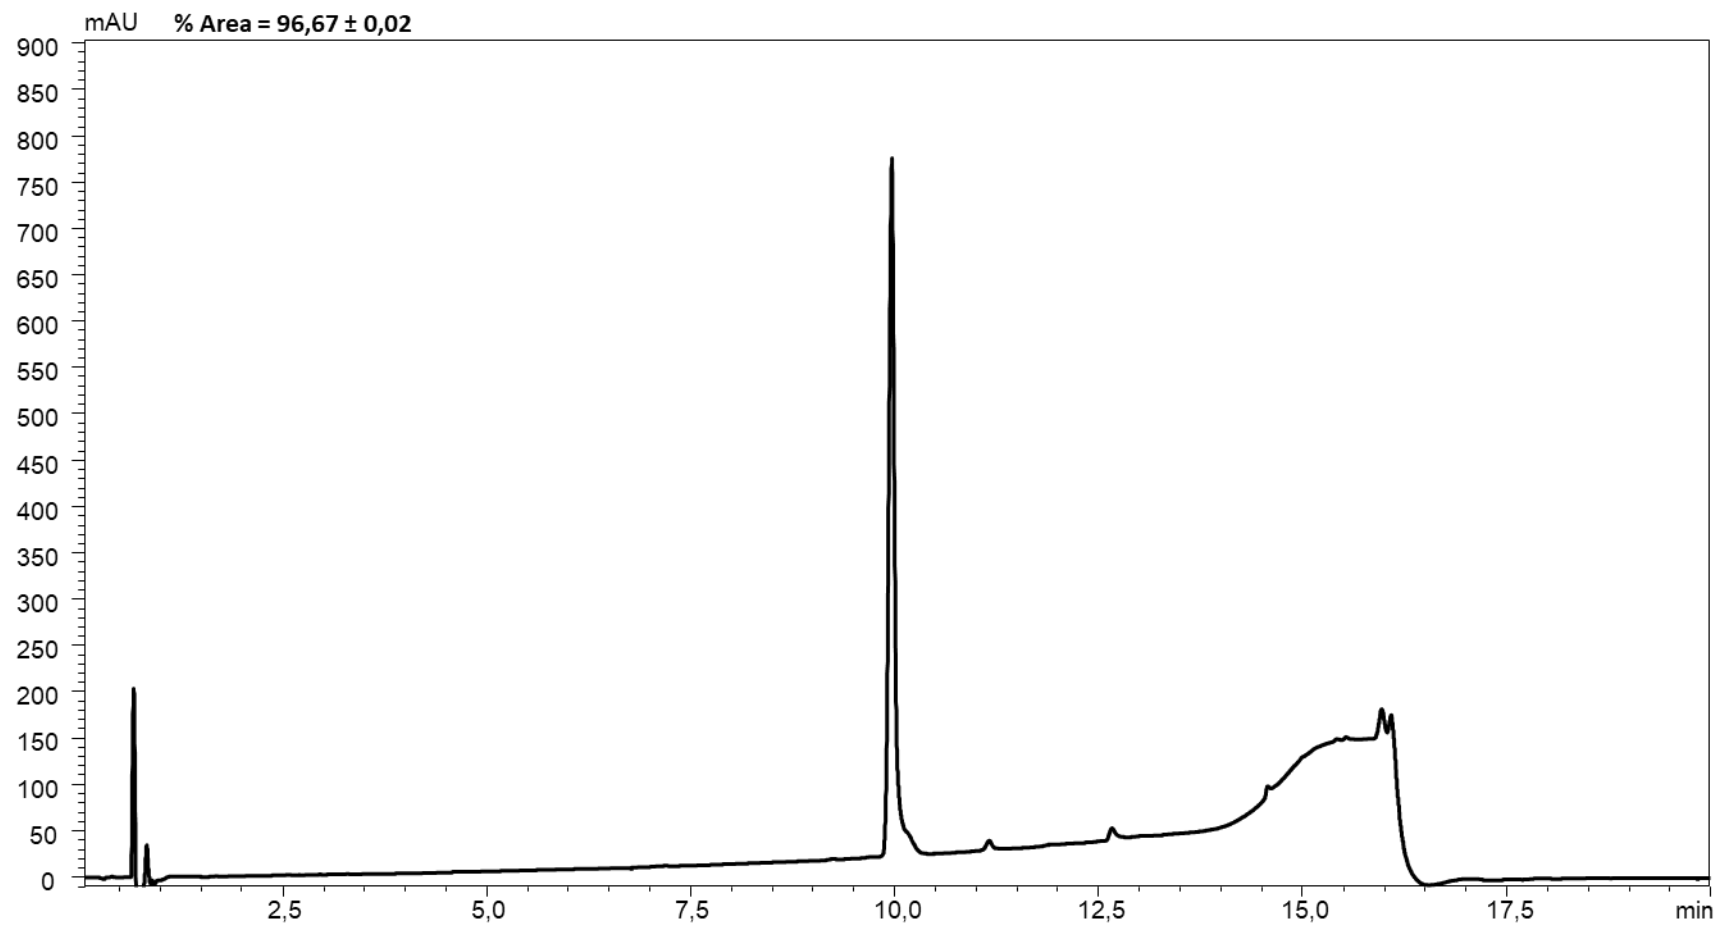

RP-HPLC trace of compound **8c**

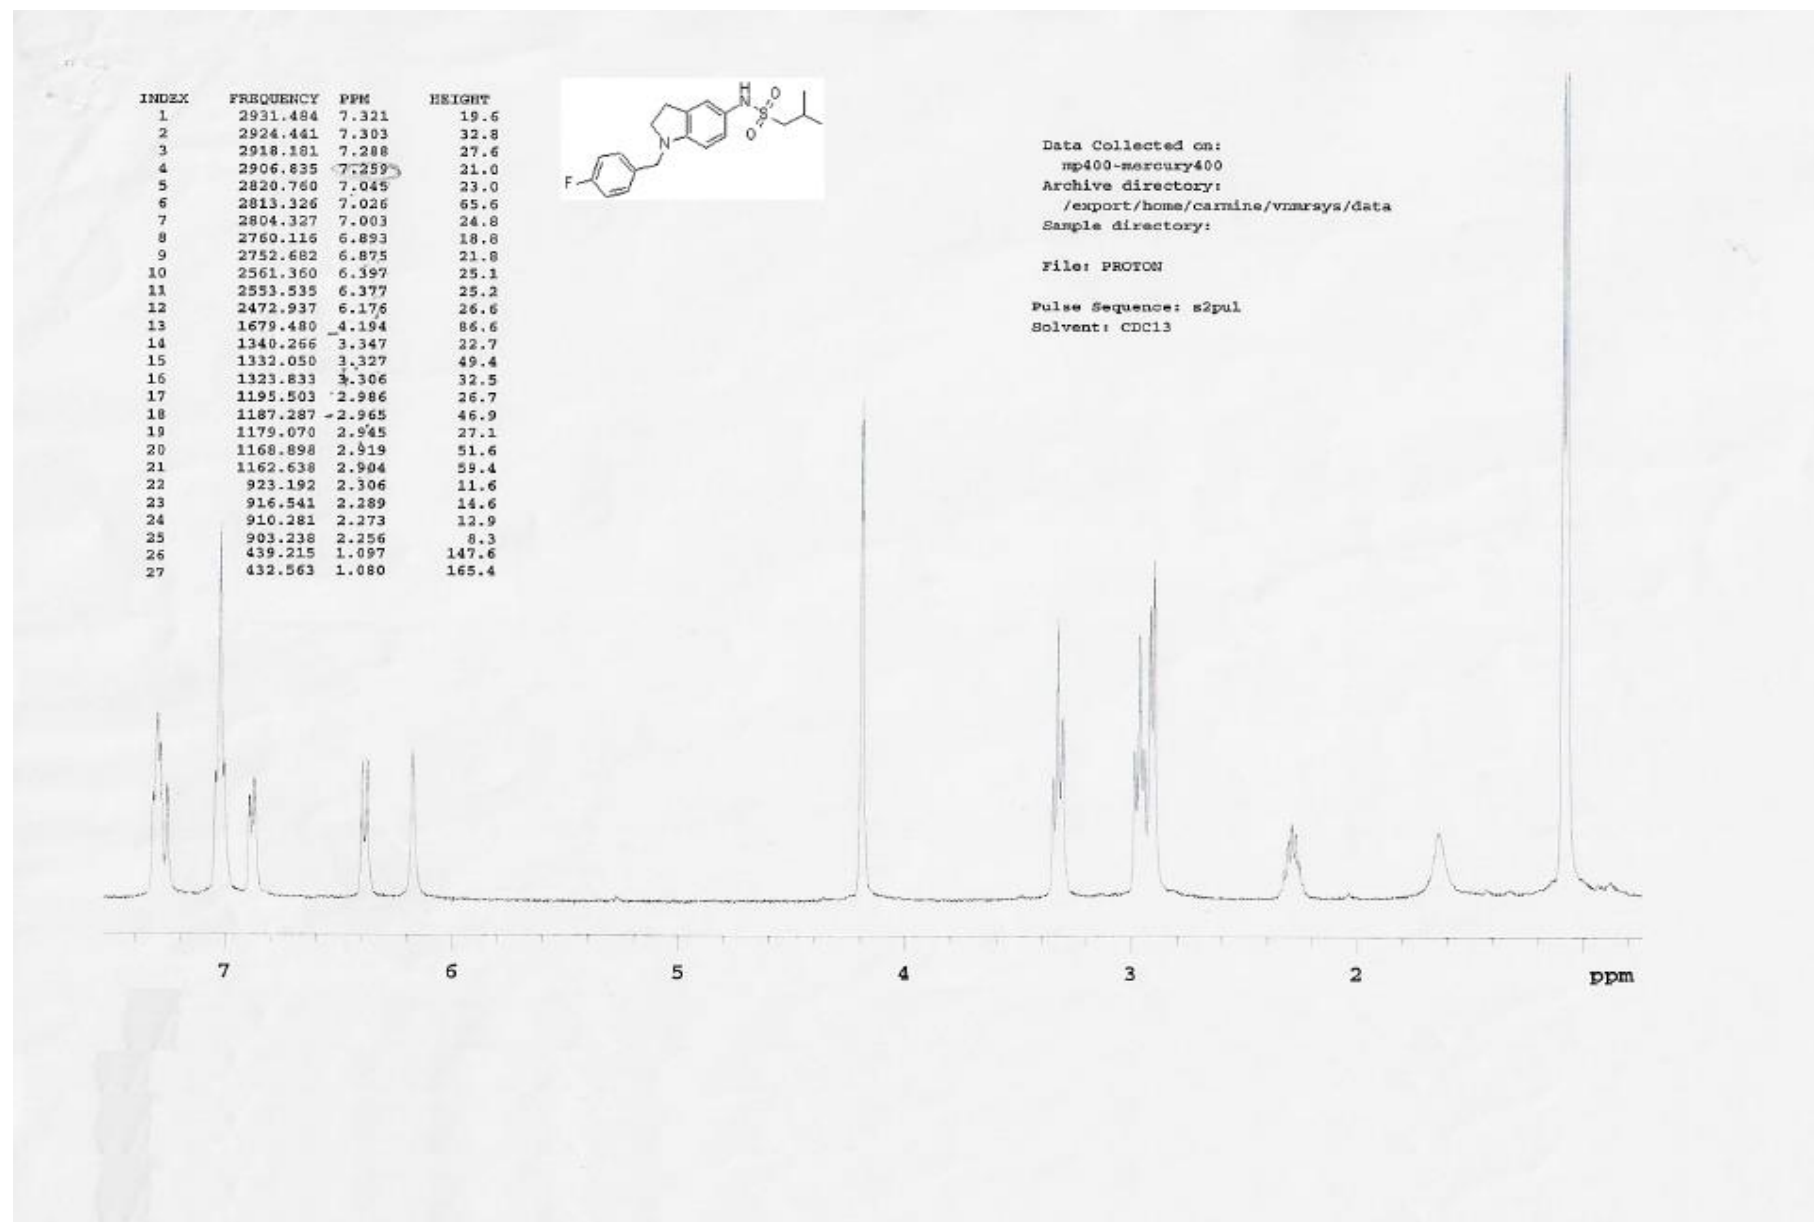

<sup>1</sup>H NMR of compound **8d**

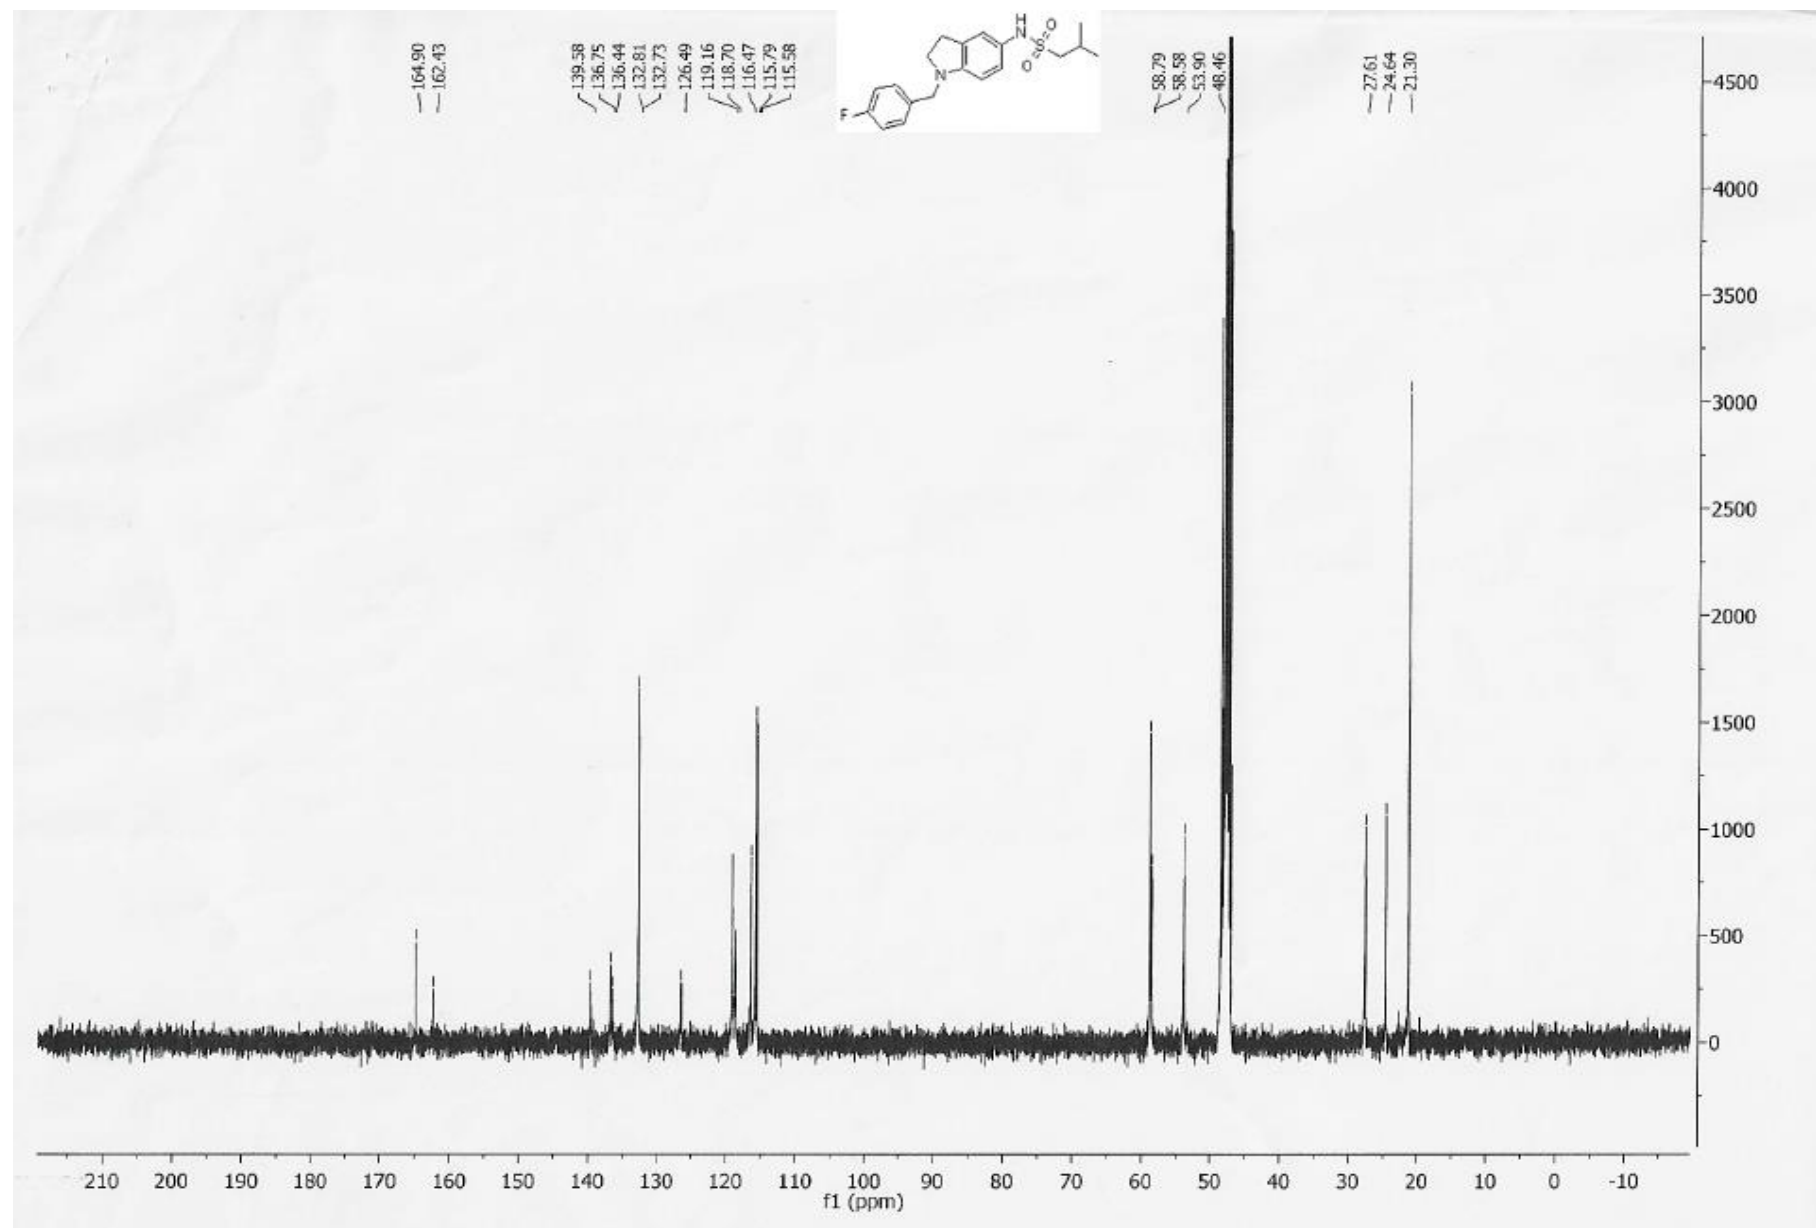

**<sup>13</sup>C NMR of compound 8d**

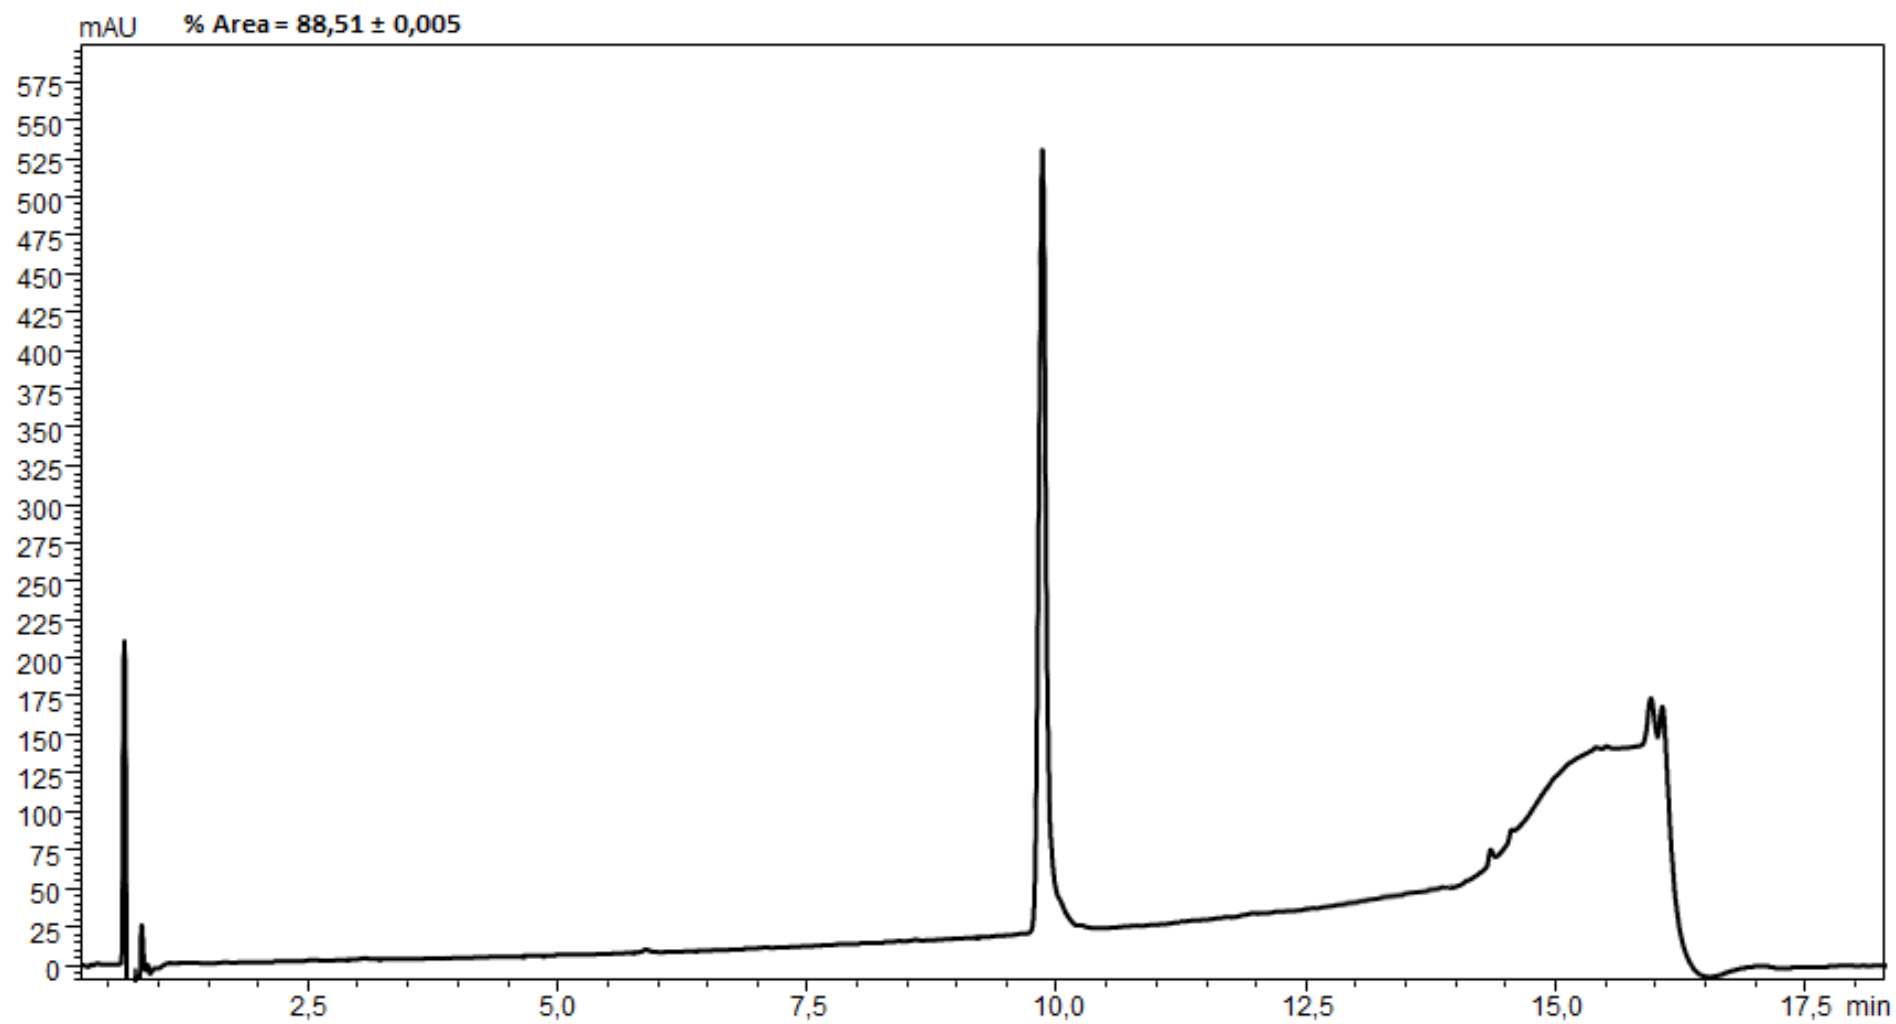

RP-HPLC trace of compound **8d**

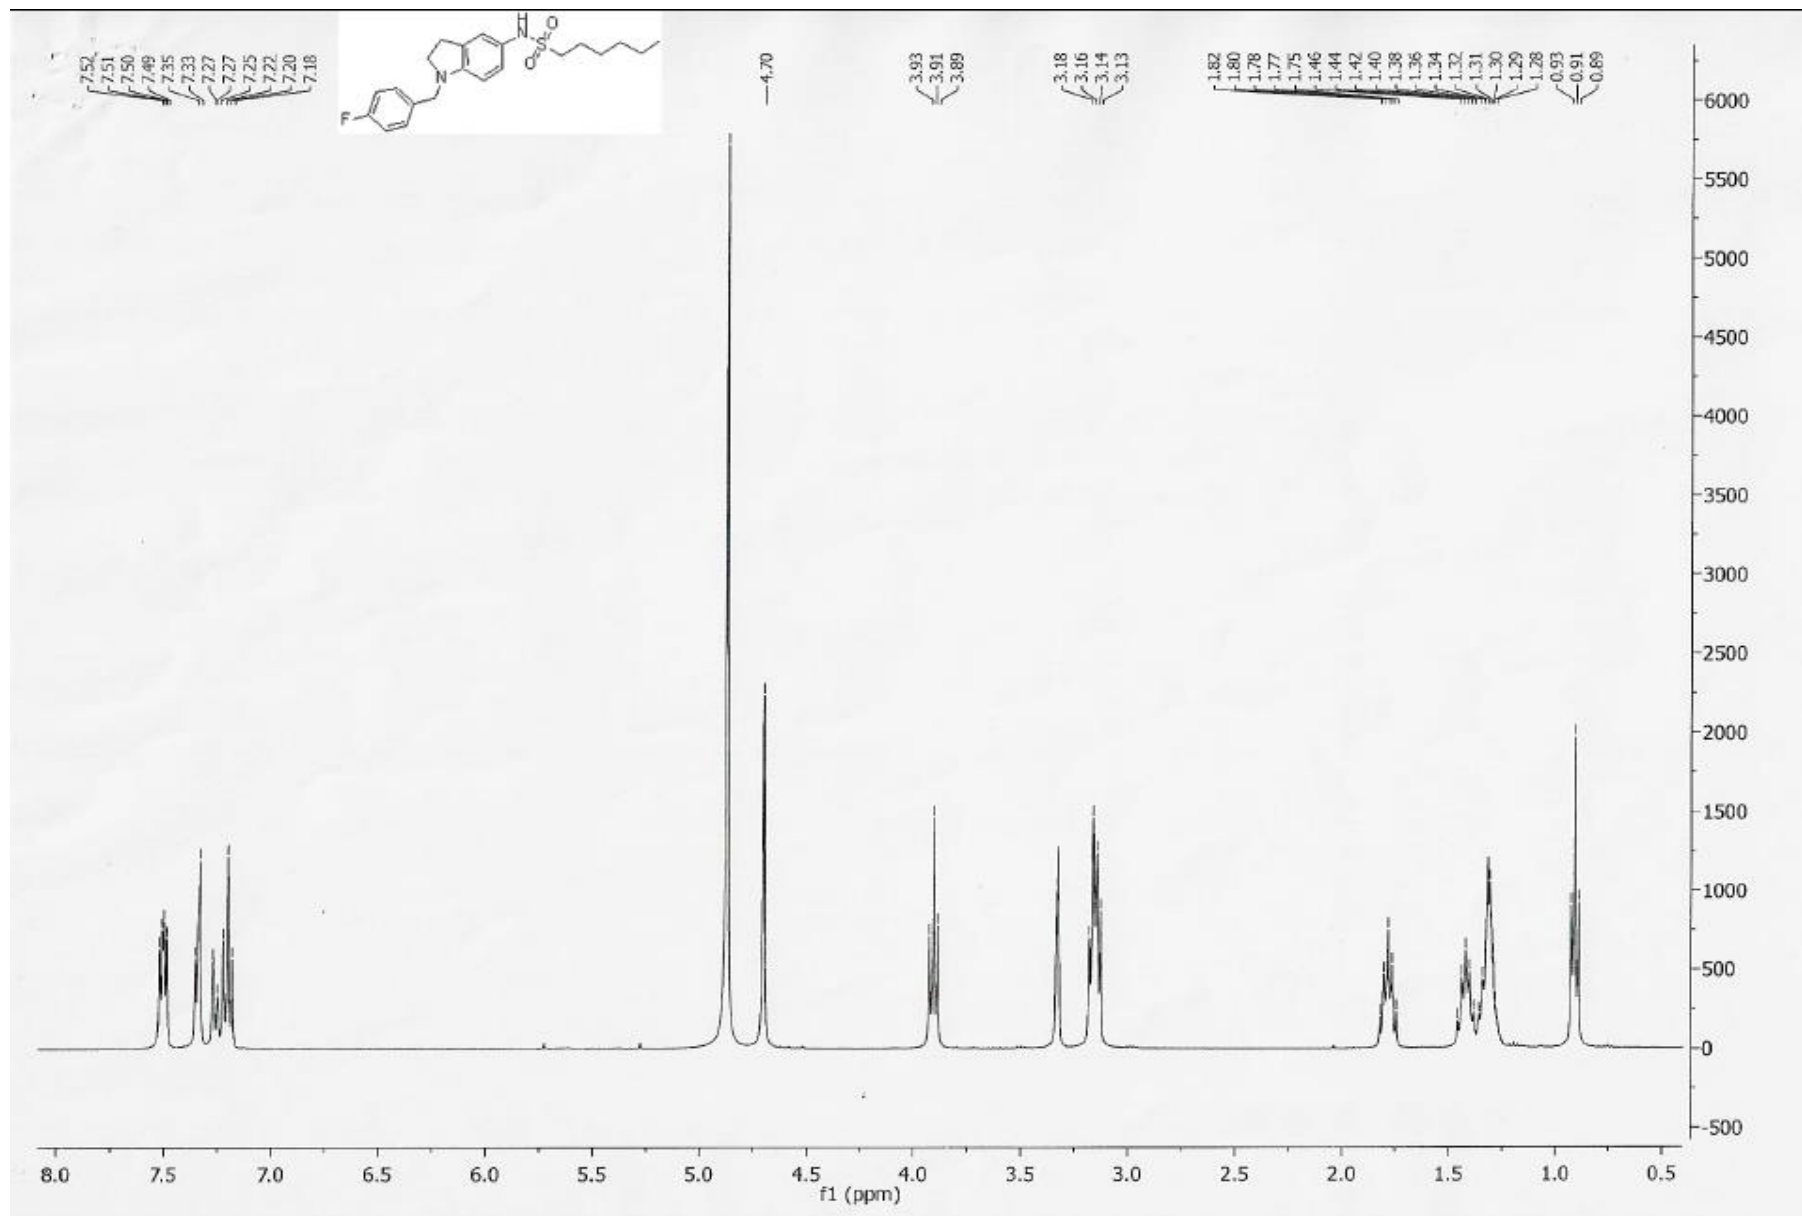

$^1\text{H}$  NMR of compound **8e**

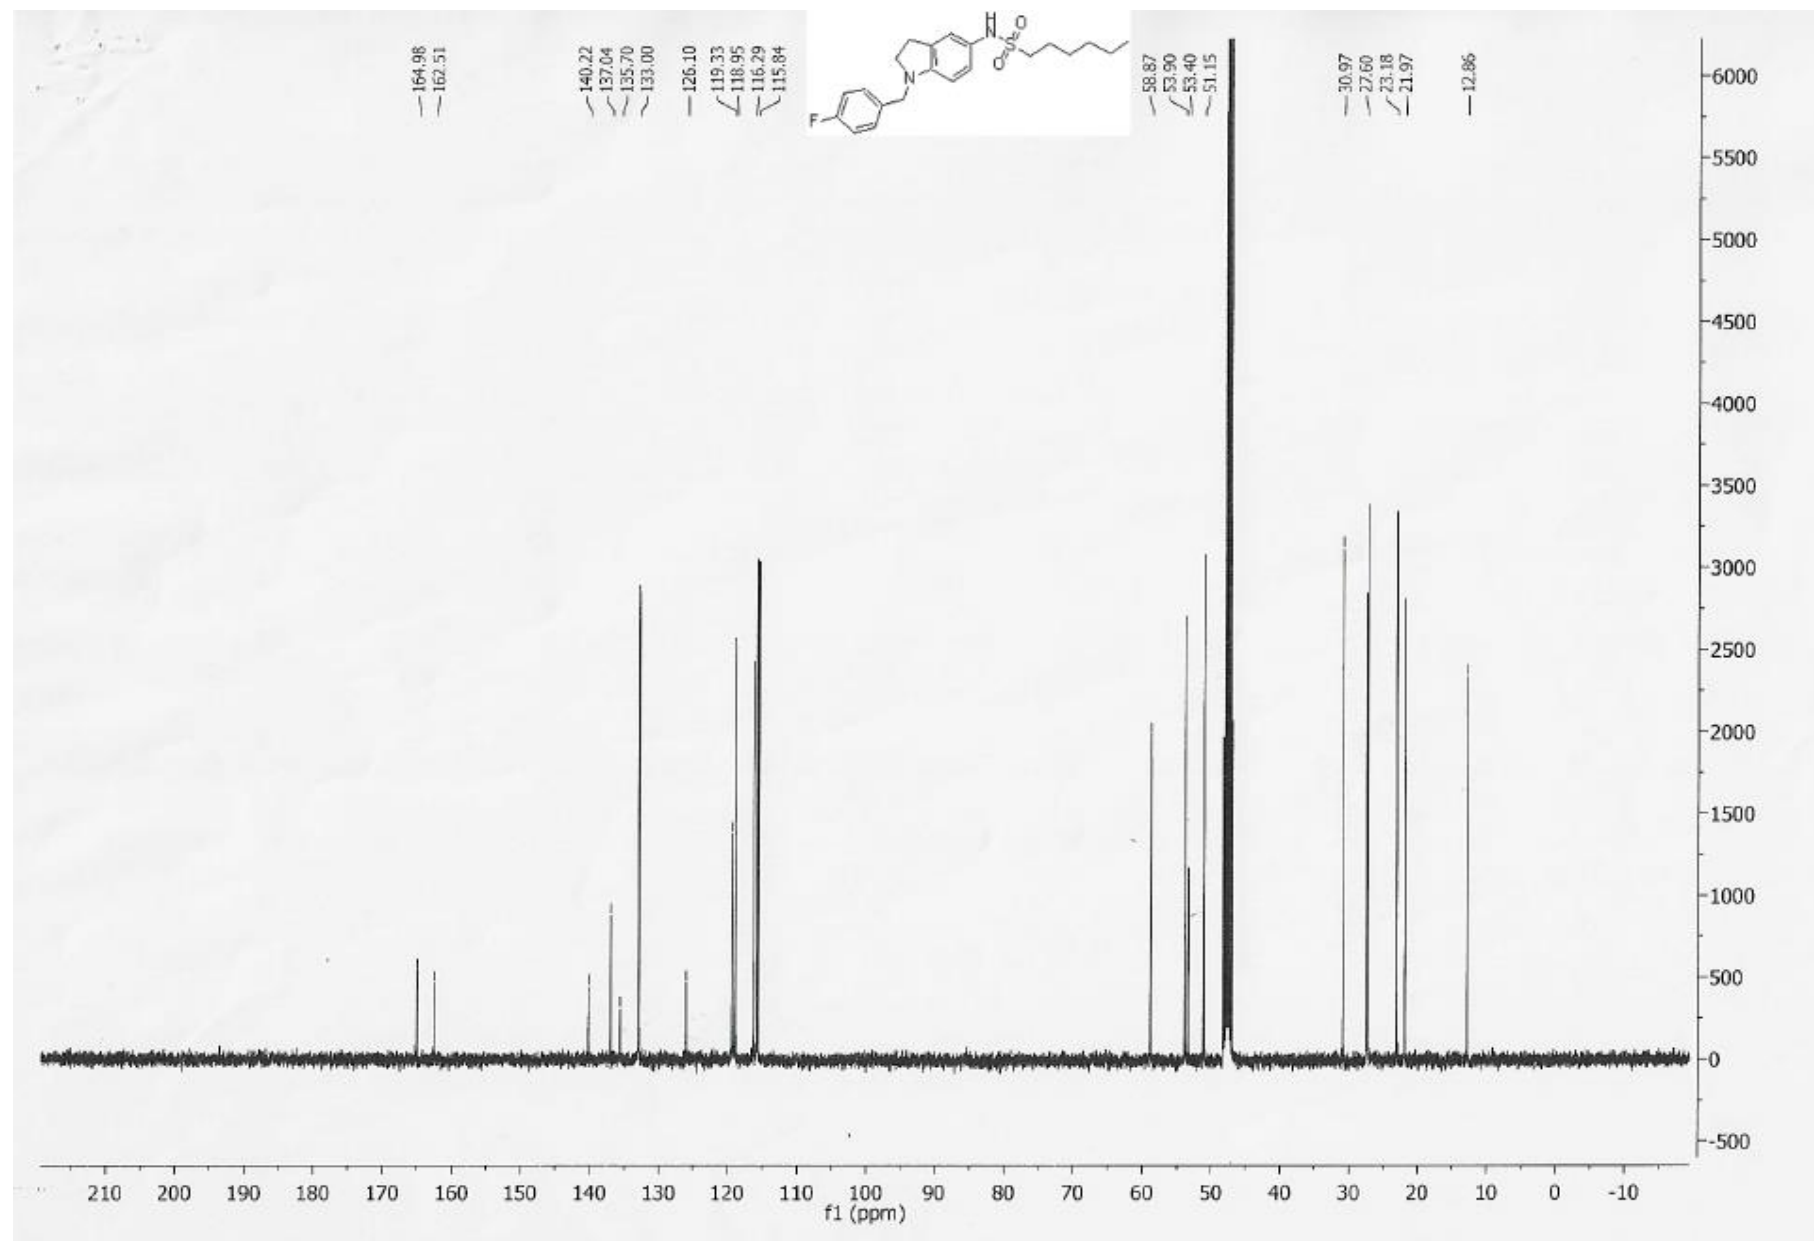

<sup>13</sup>C NMR of compound **8e**



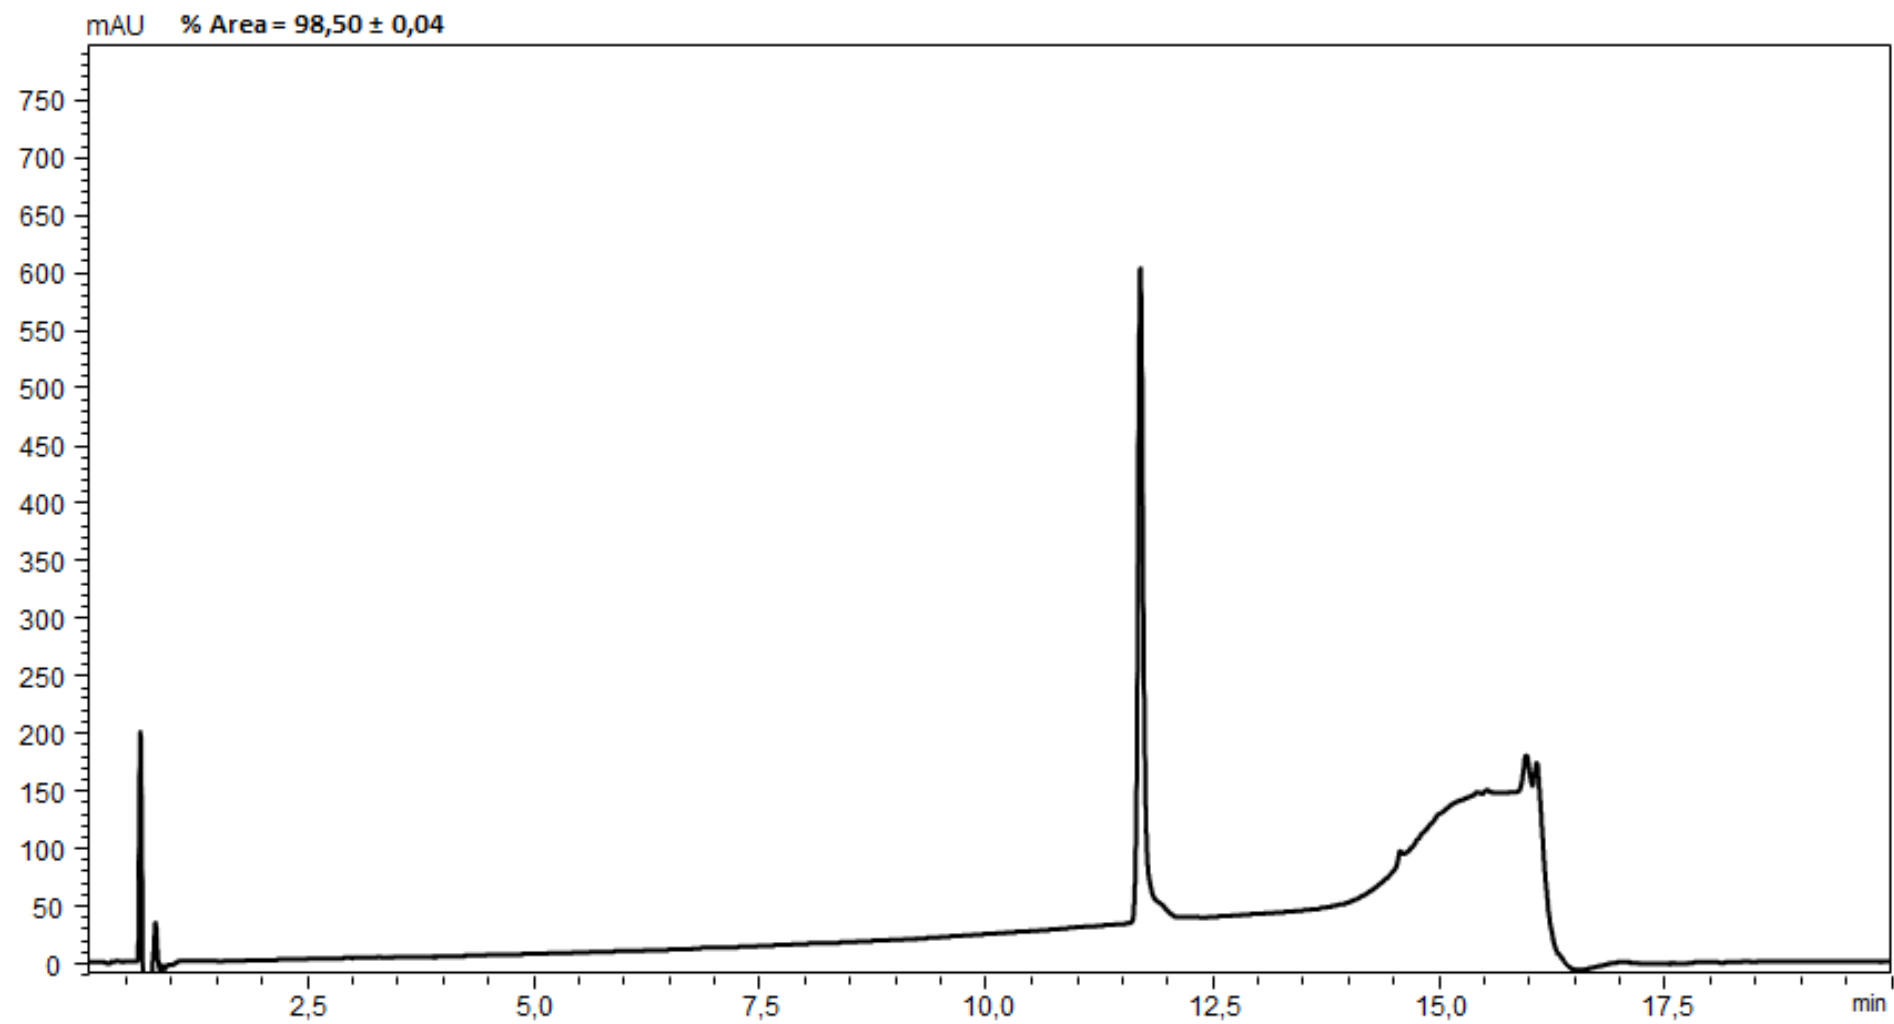

RP-HPLC trace of compound **8e**

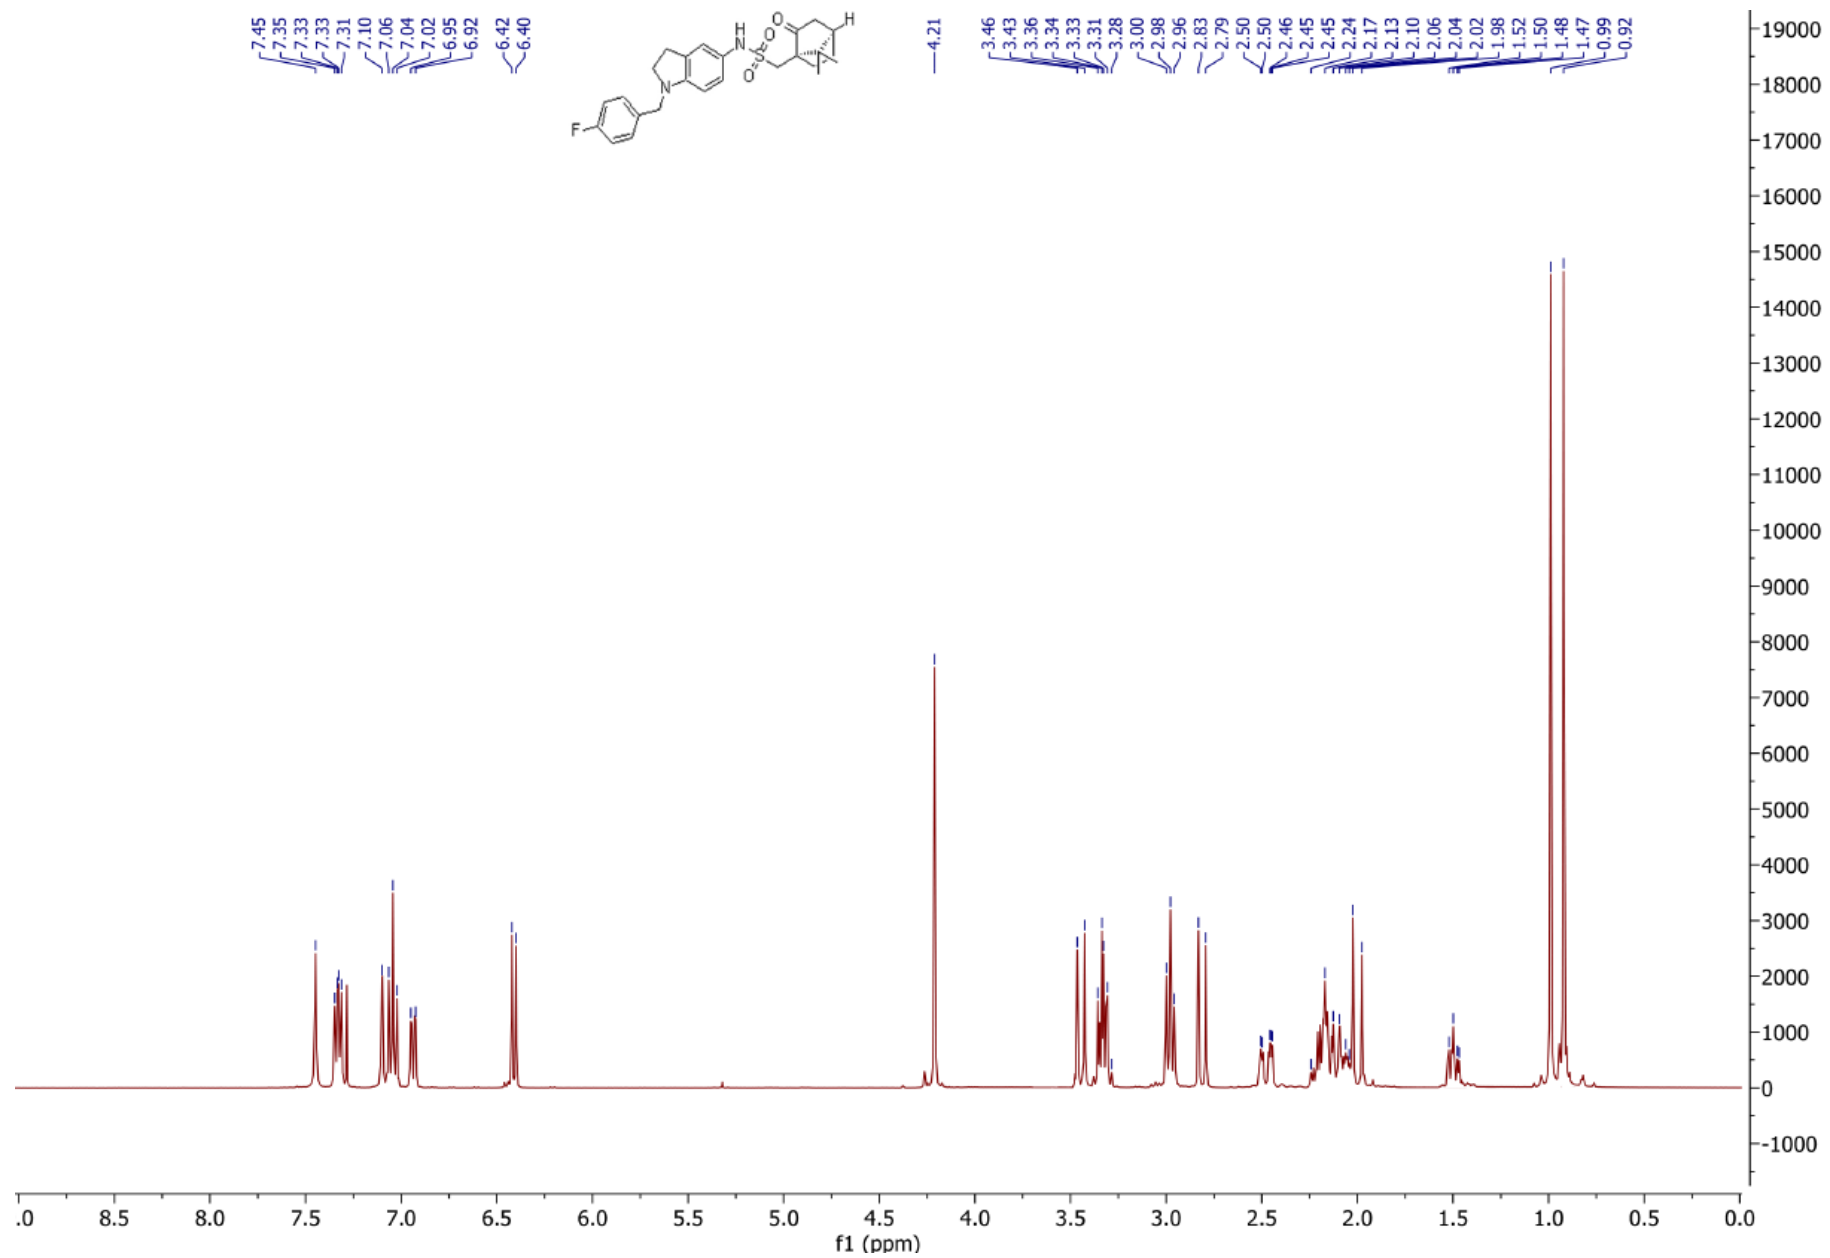

<sup>1</sup>H NMR of compound **8f**

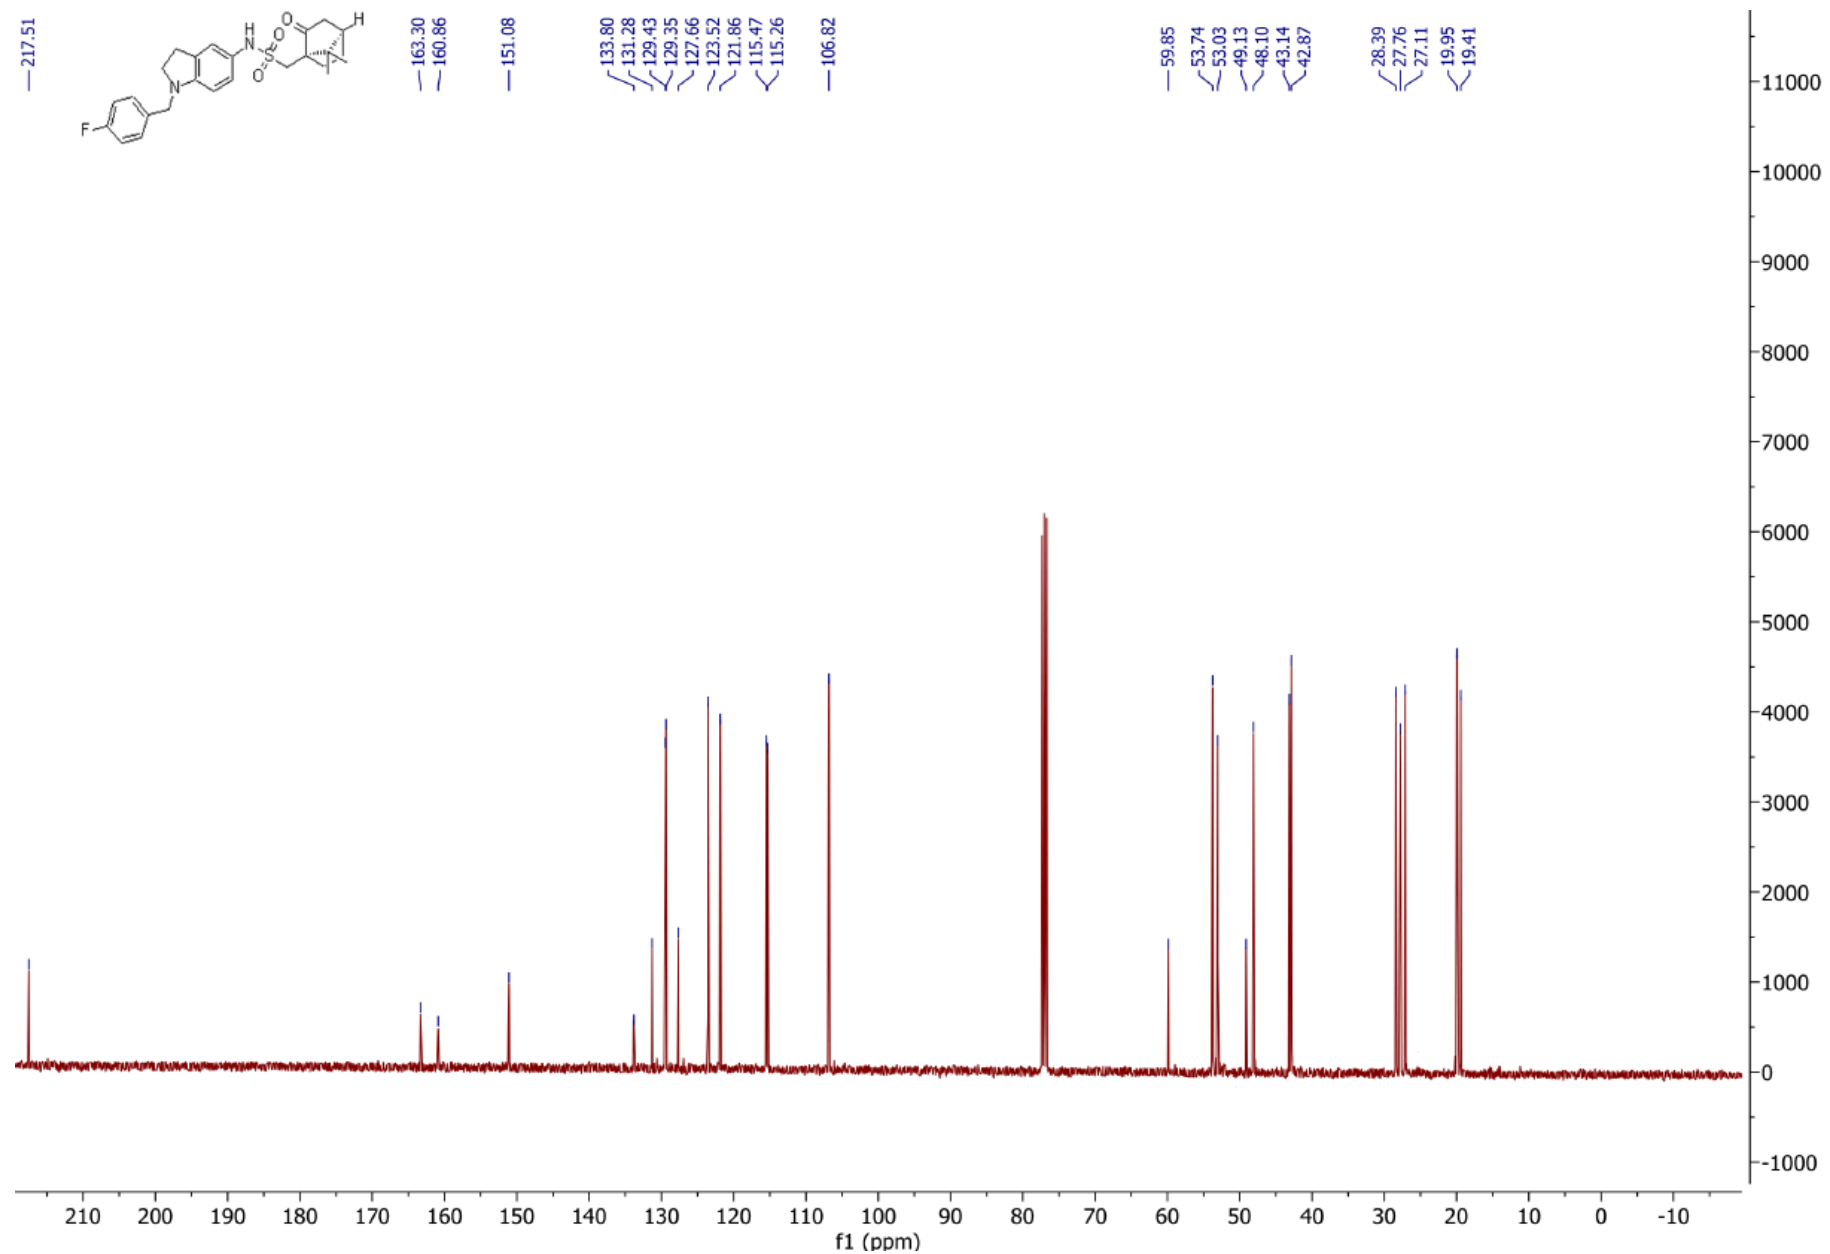

$^{13}\text{C}$  NMR of compound **8f**

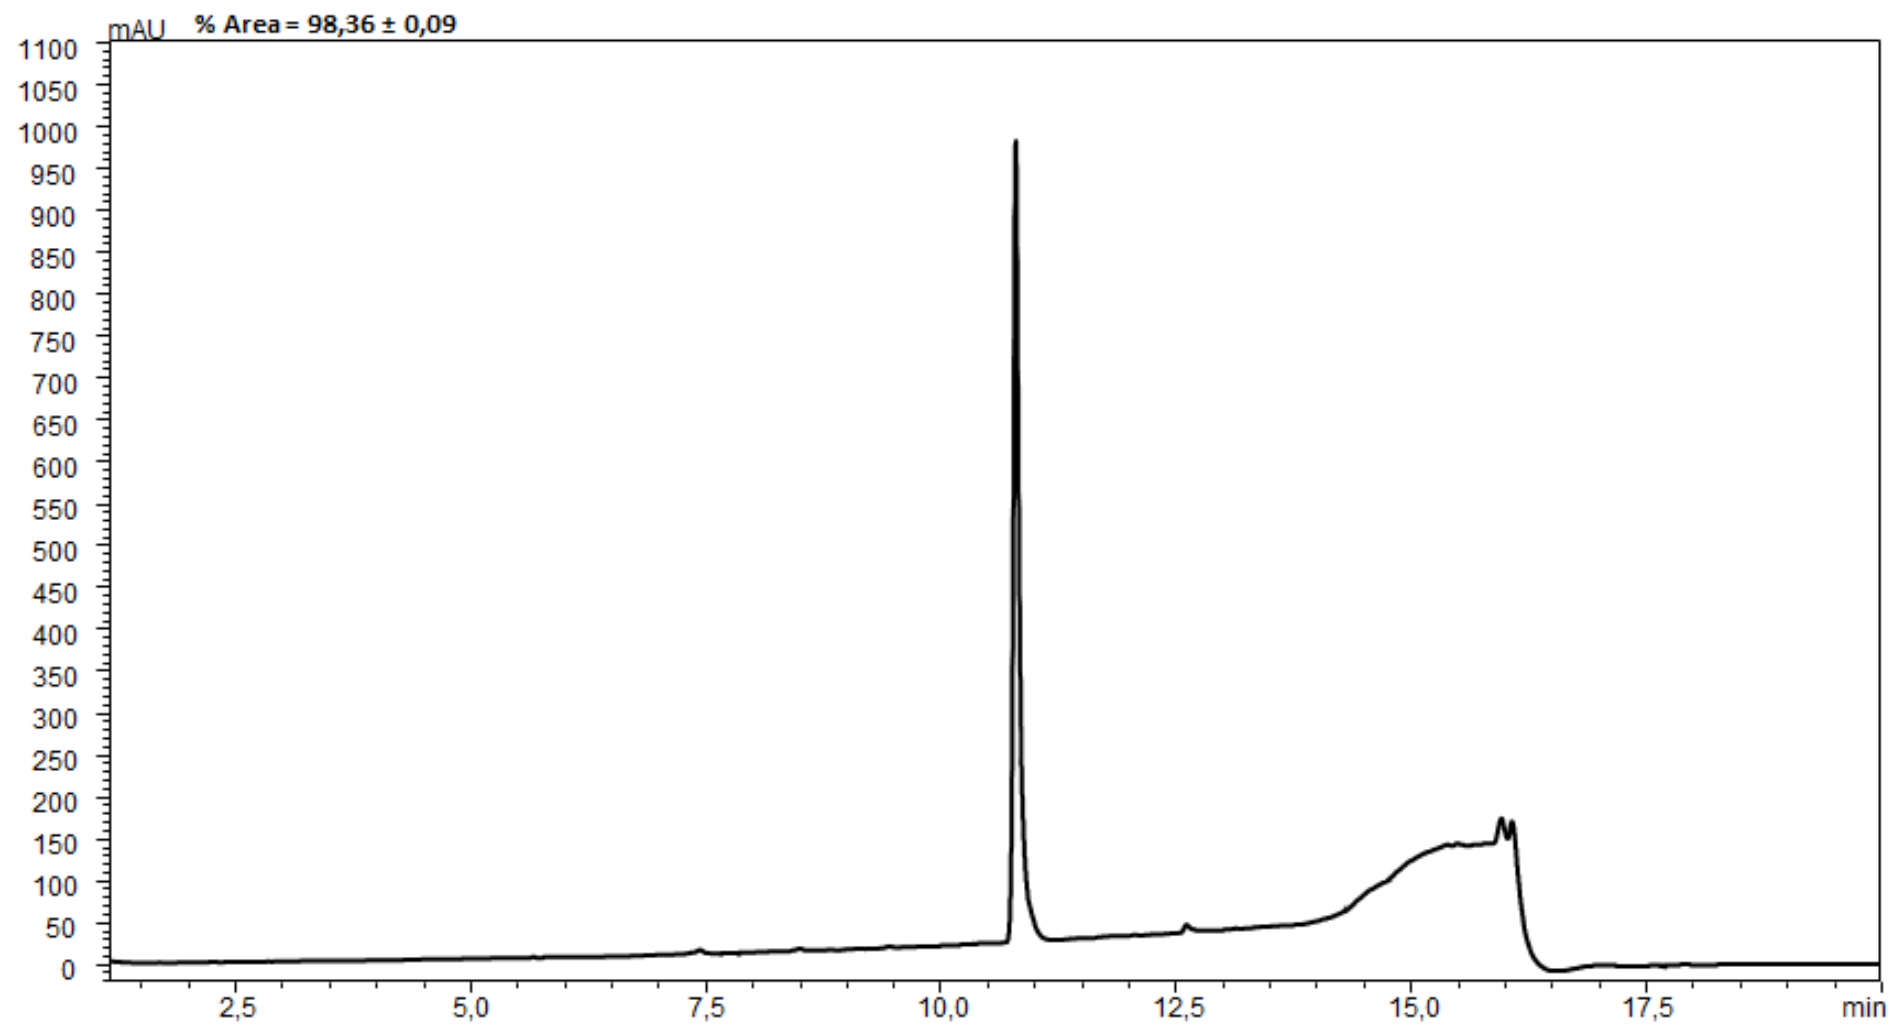

RP-HPLC of compound **8f**

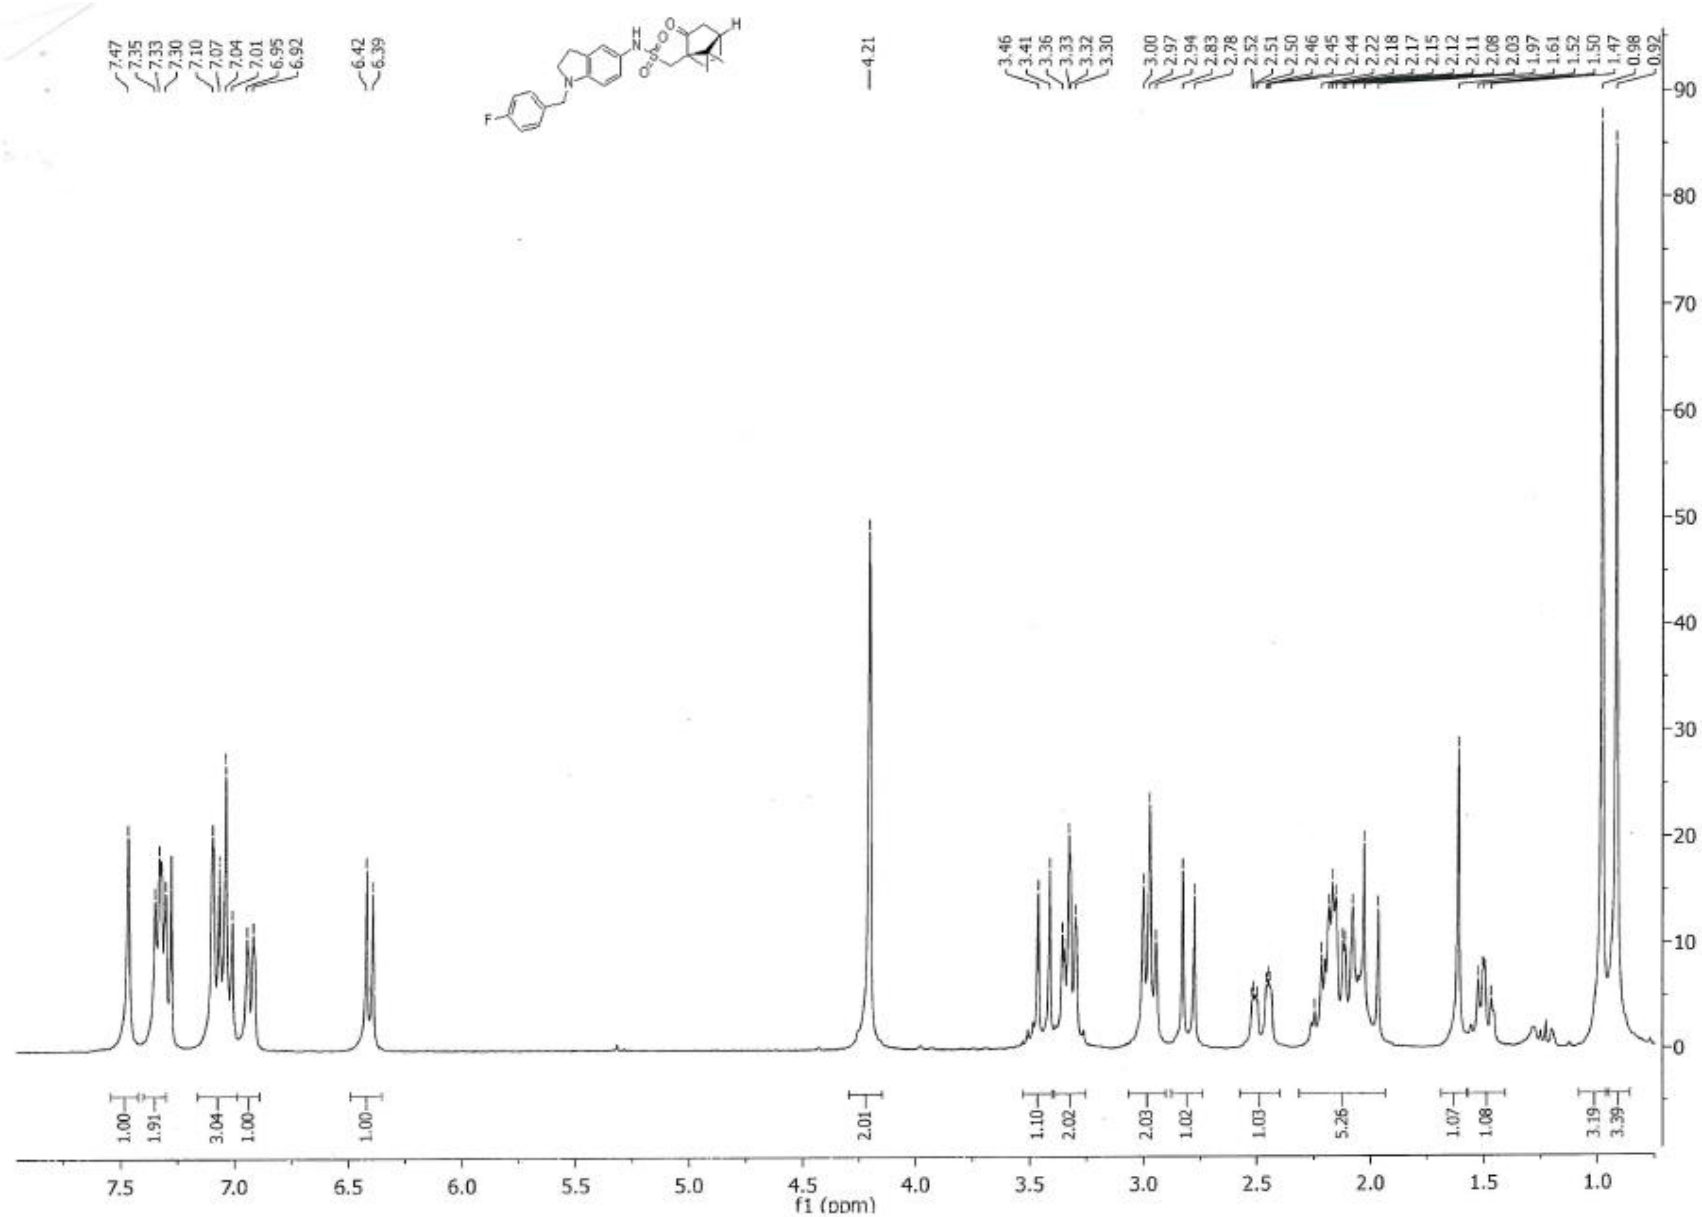

$^1\text{H}$  NMR of compound **8g**

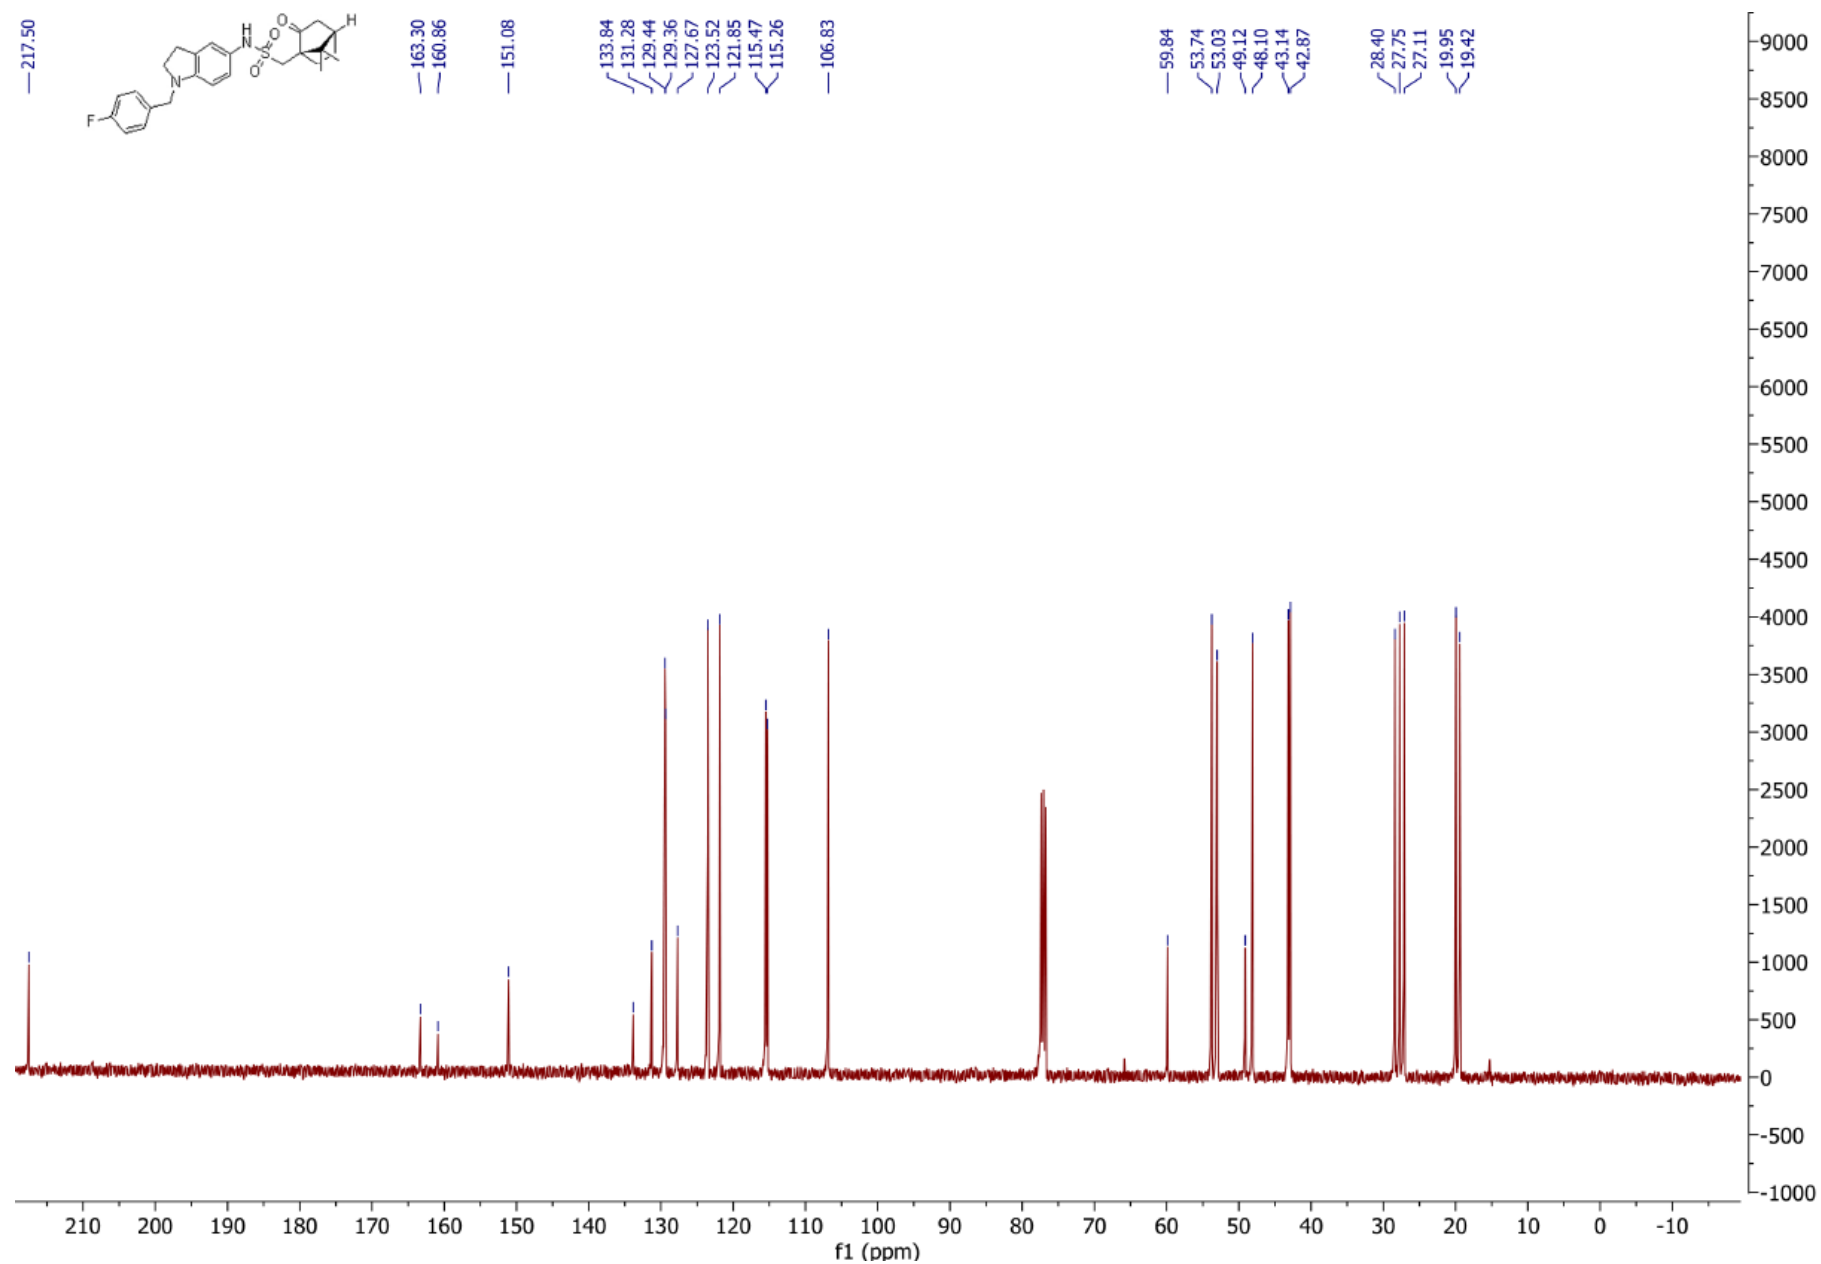

<sup>13</sup>C NMR of compound **8g**

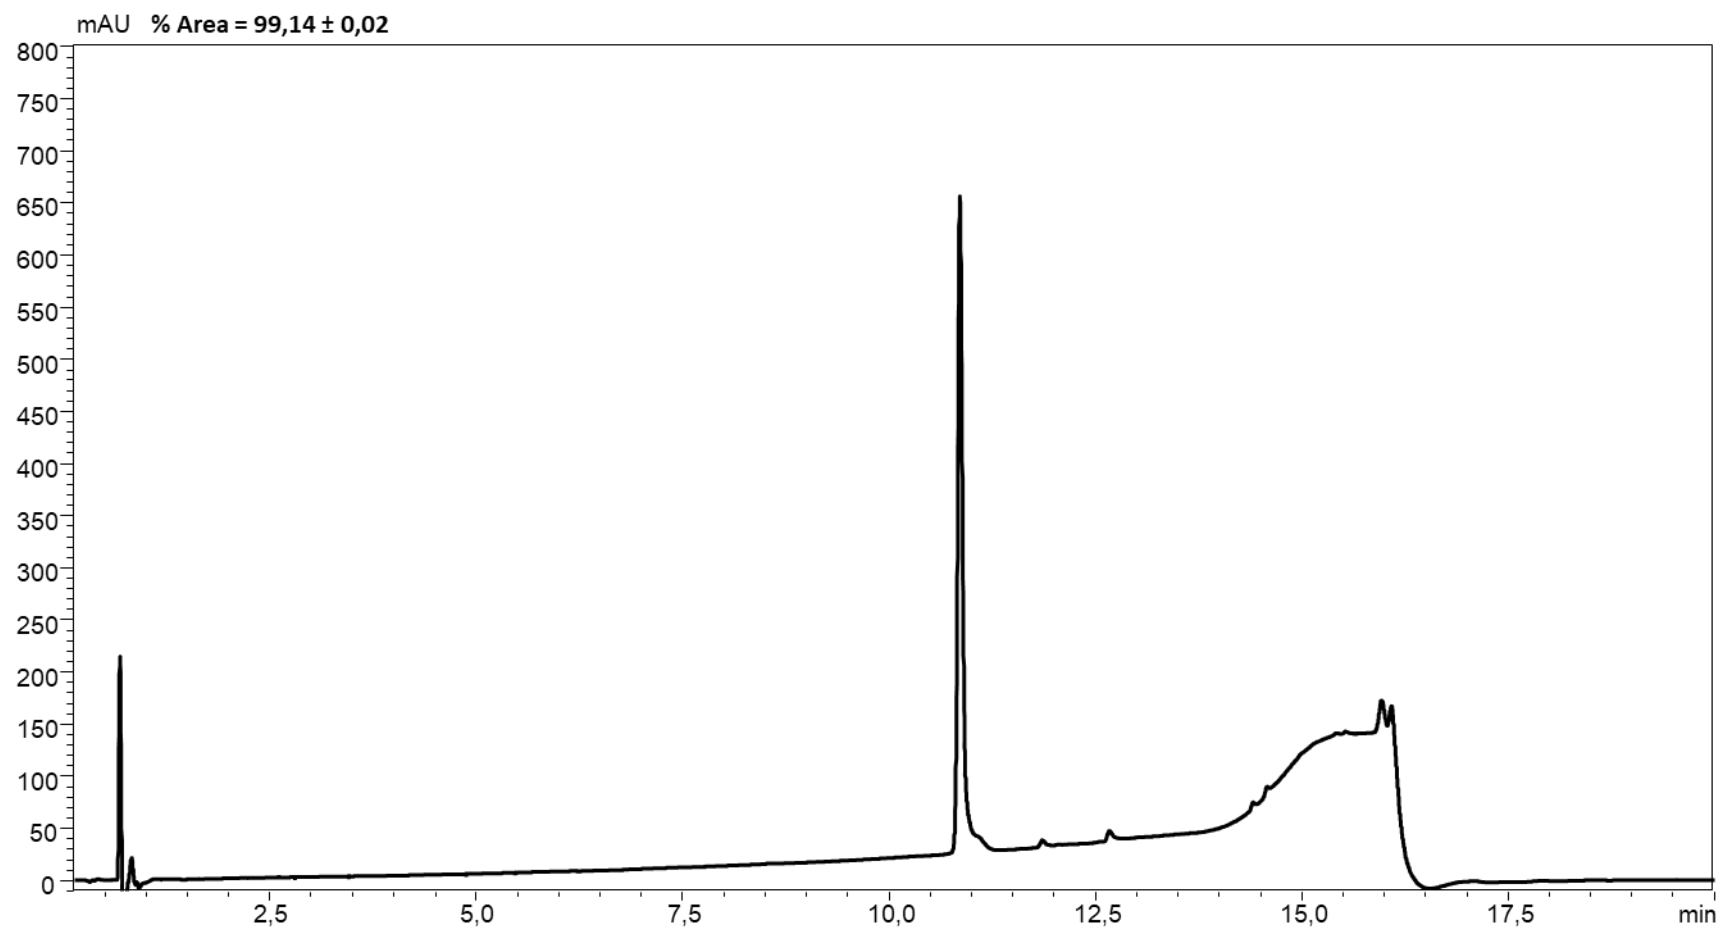

RP-HPLC trace of compound **8g**

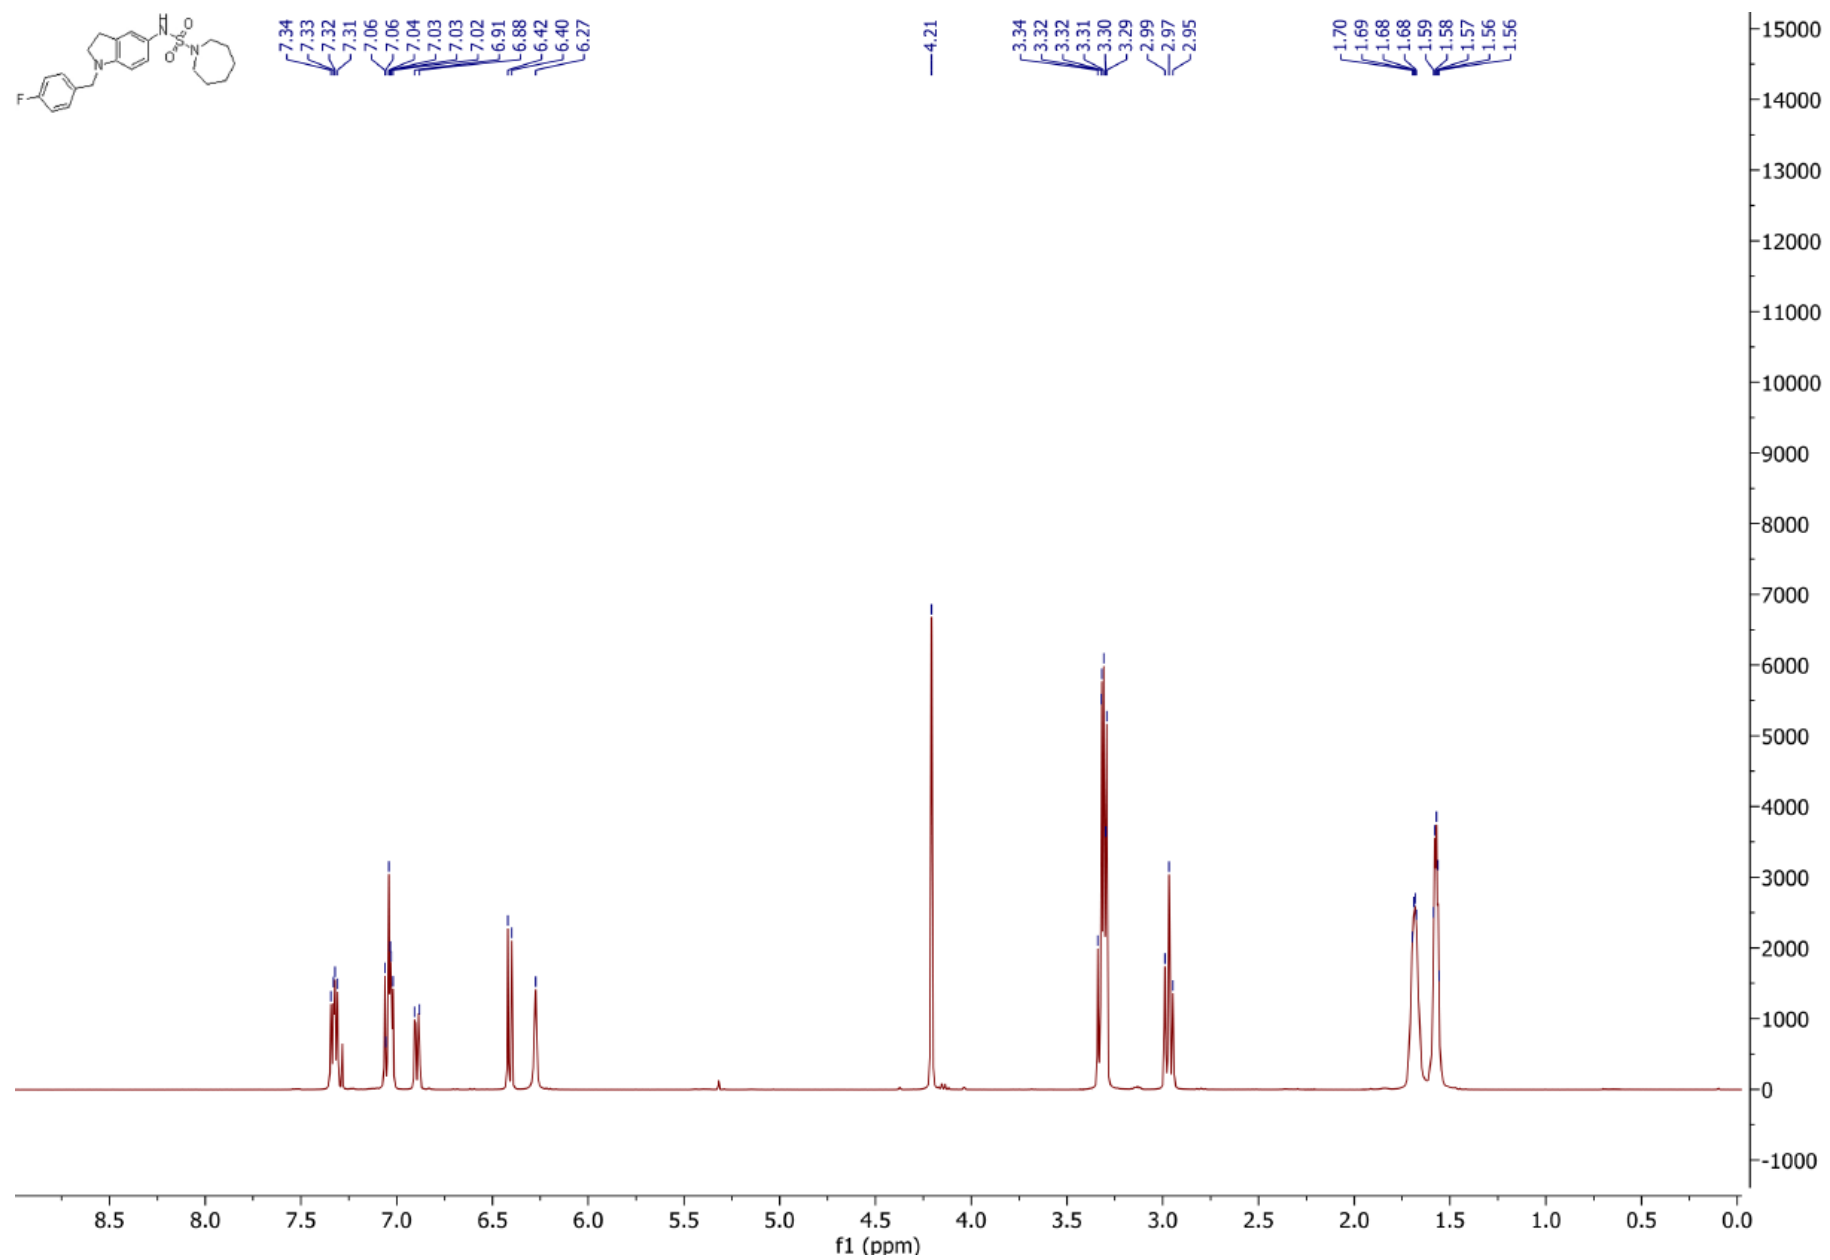



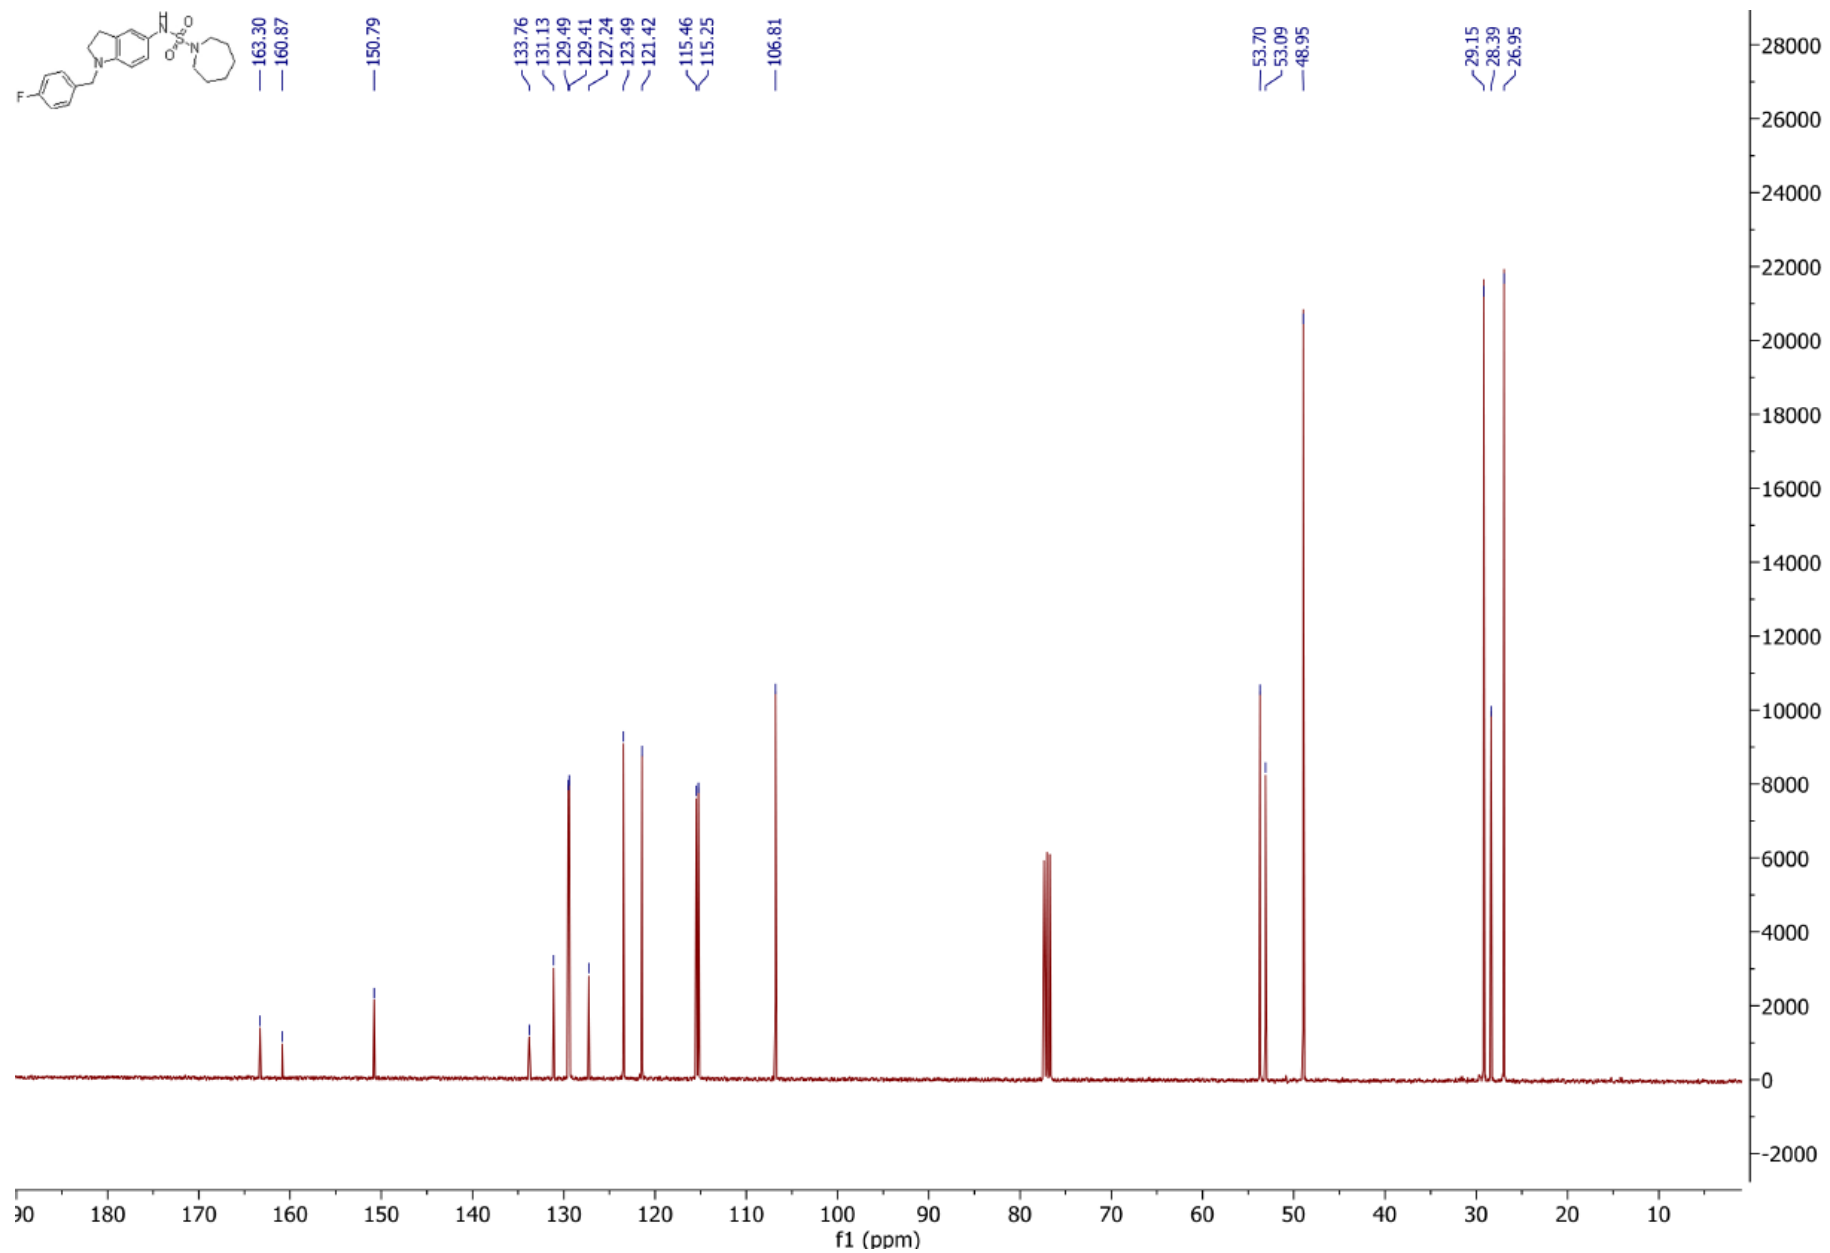

<sup>13</sup>C NMR of compound **8h**

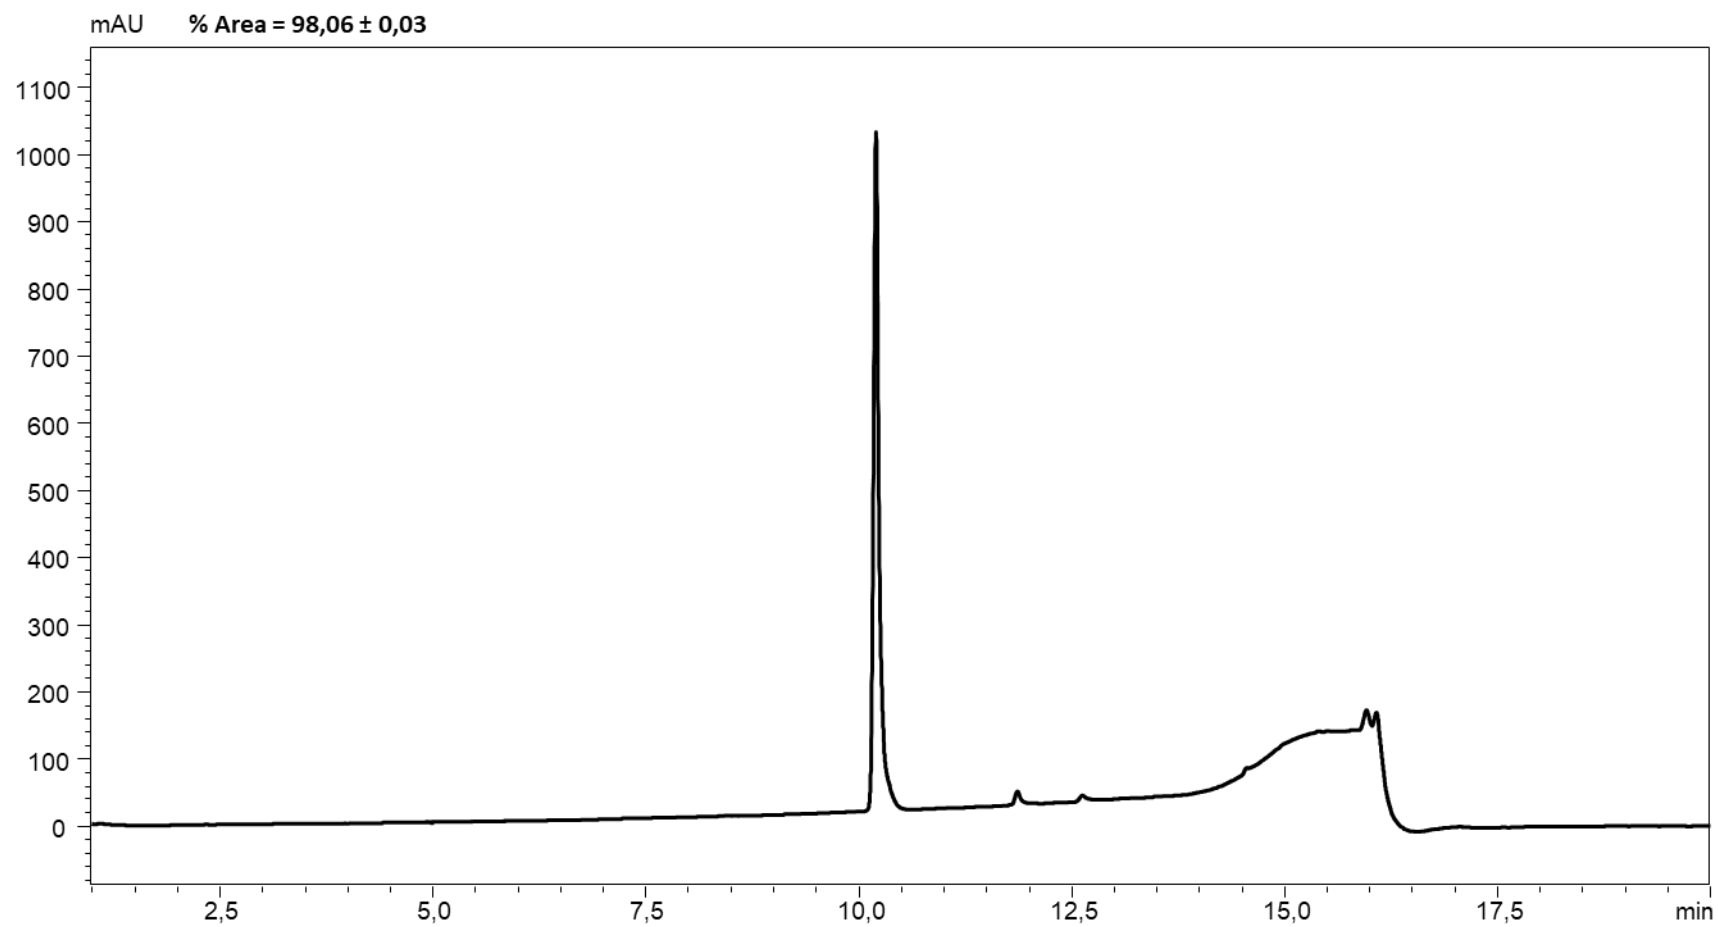

RP-HPLC trace of compound **8h**

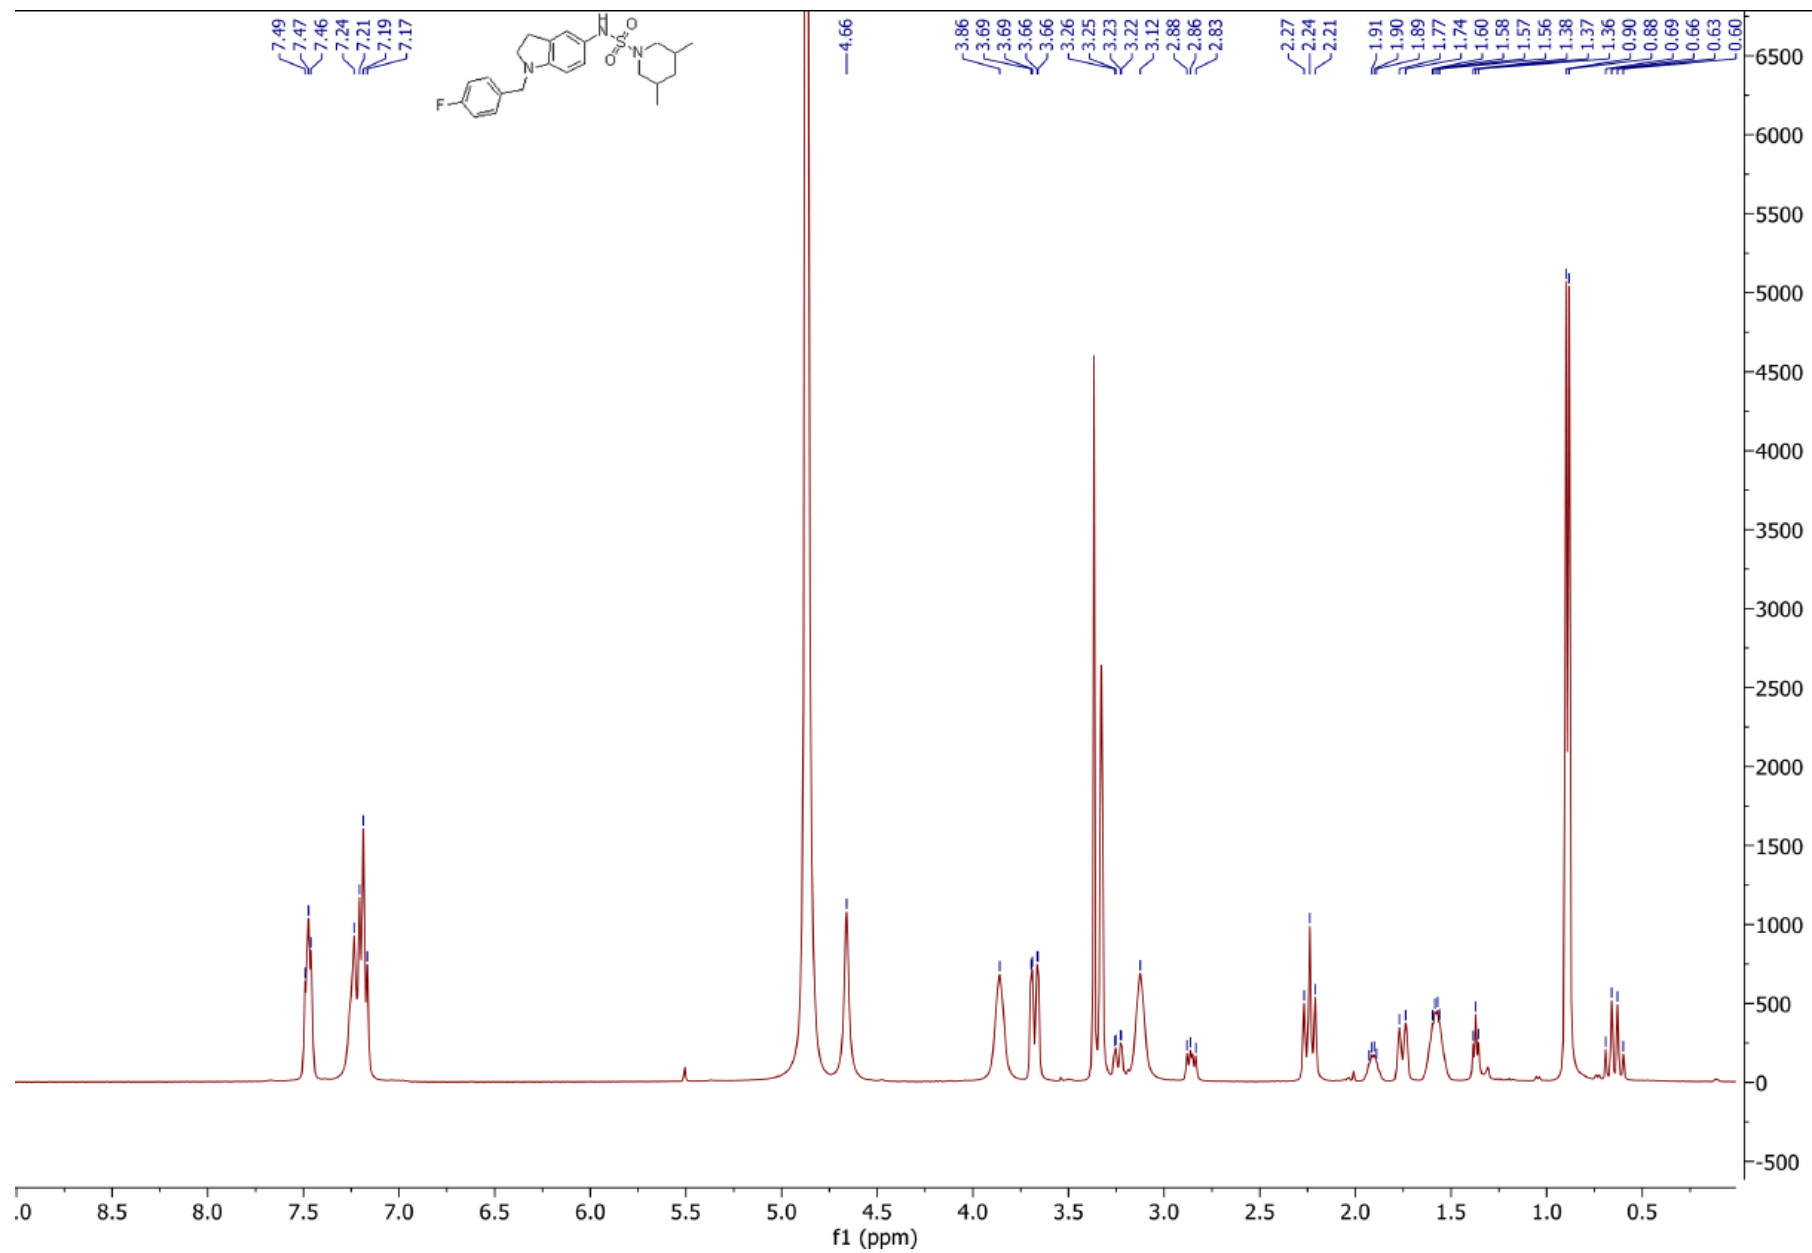

<sup>1</sup>H NMR of compound **8i**

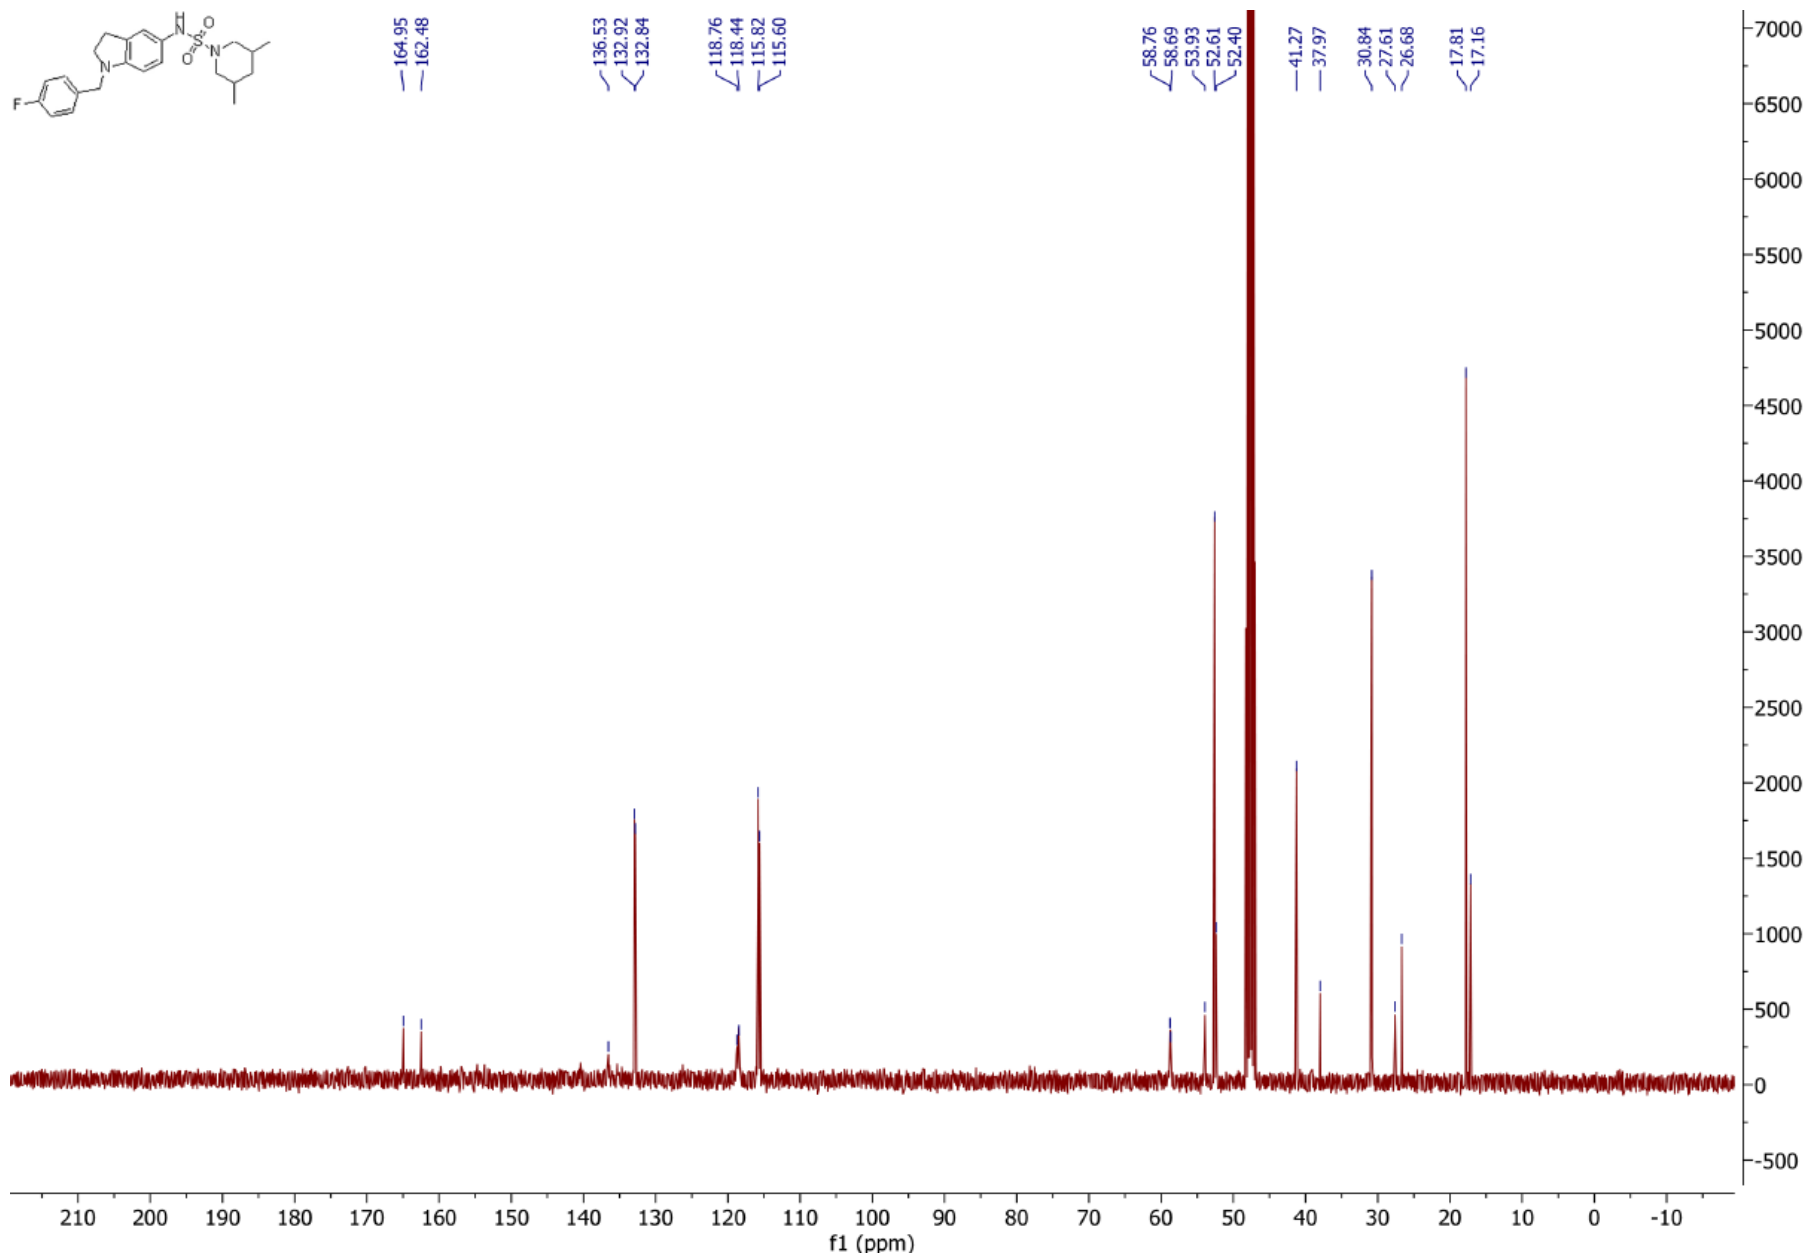

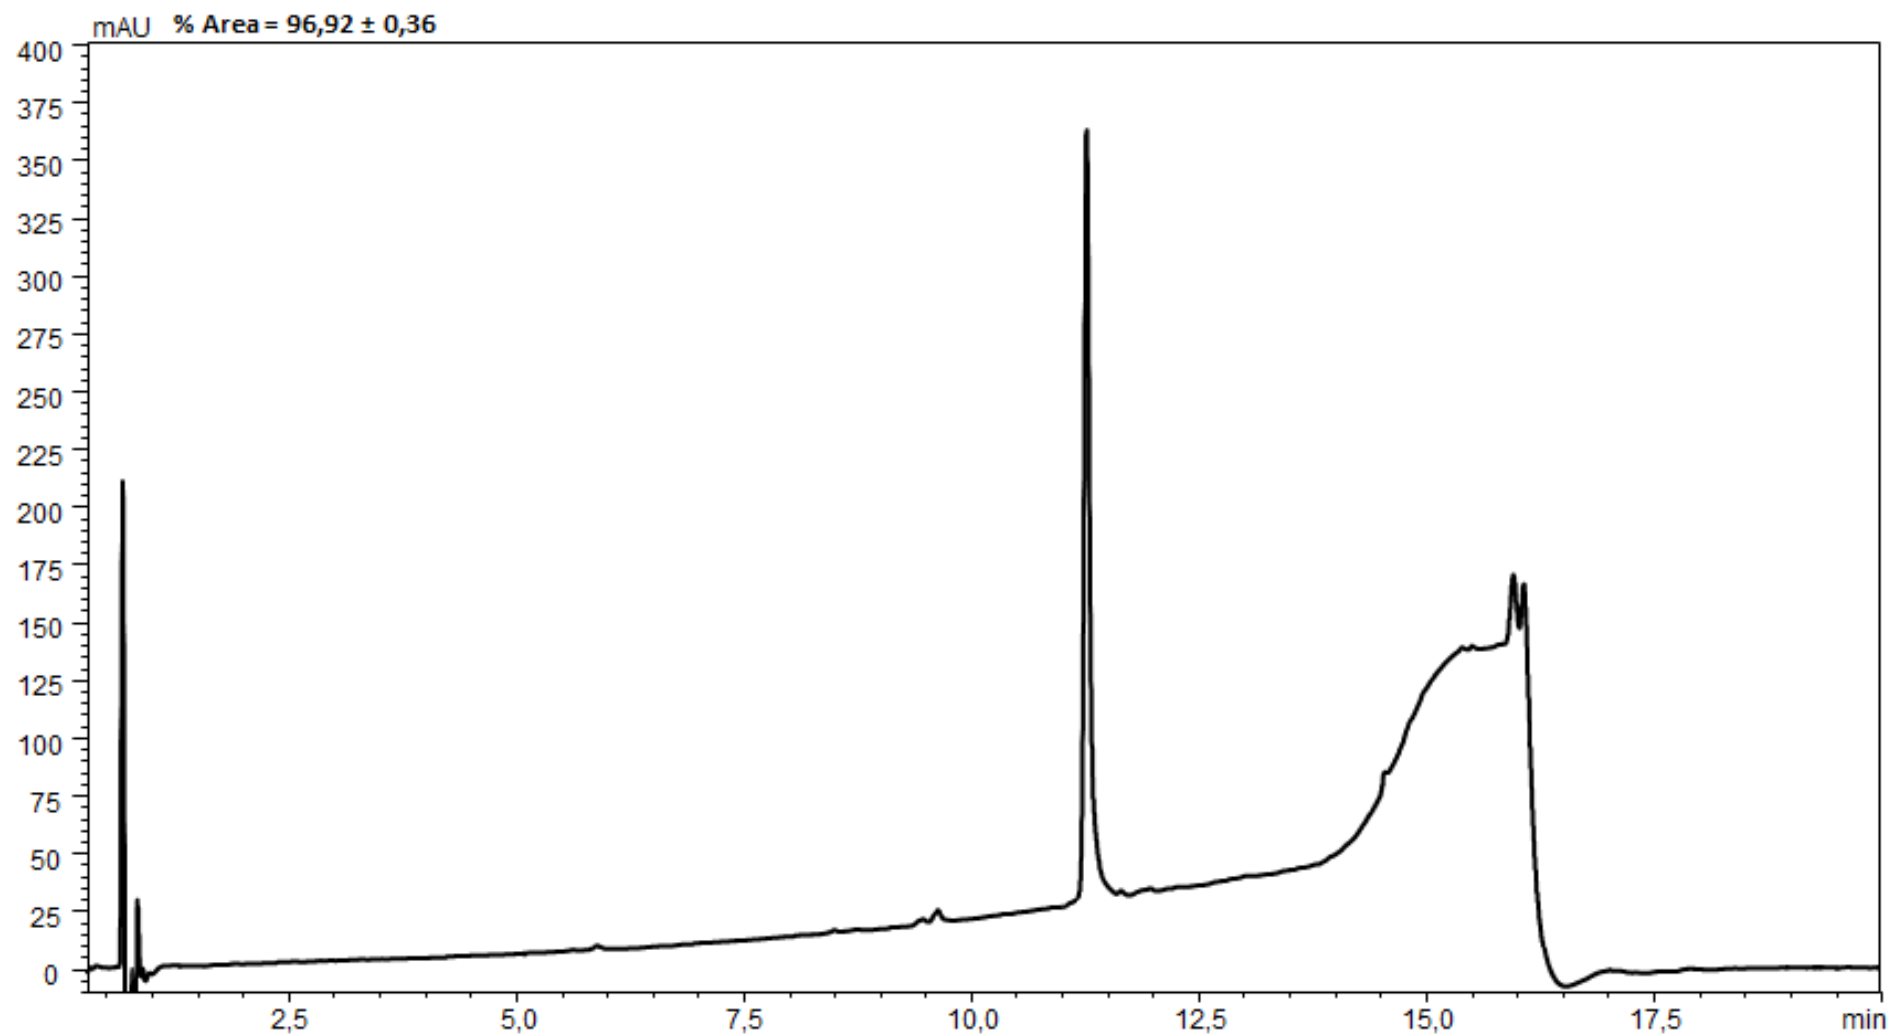

RP-HPLC of compound **8i**

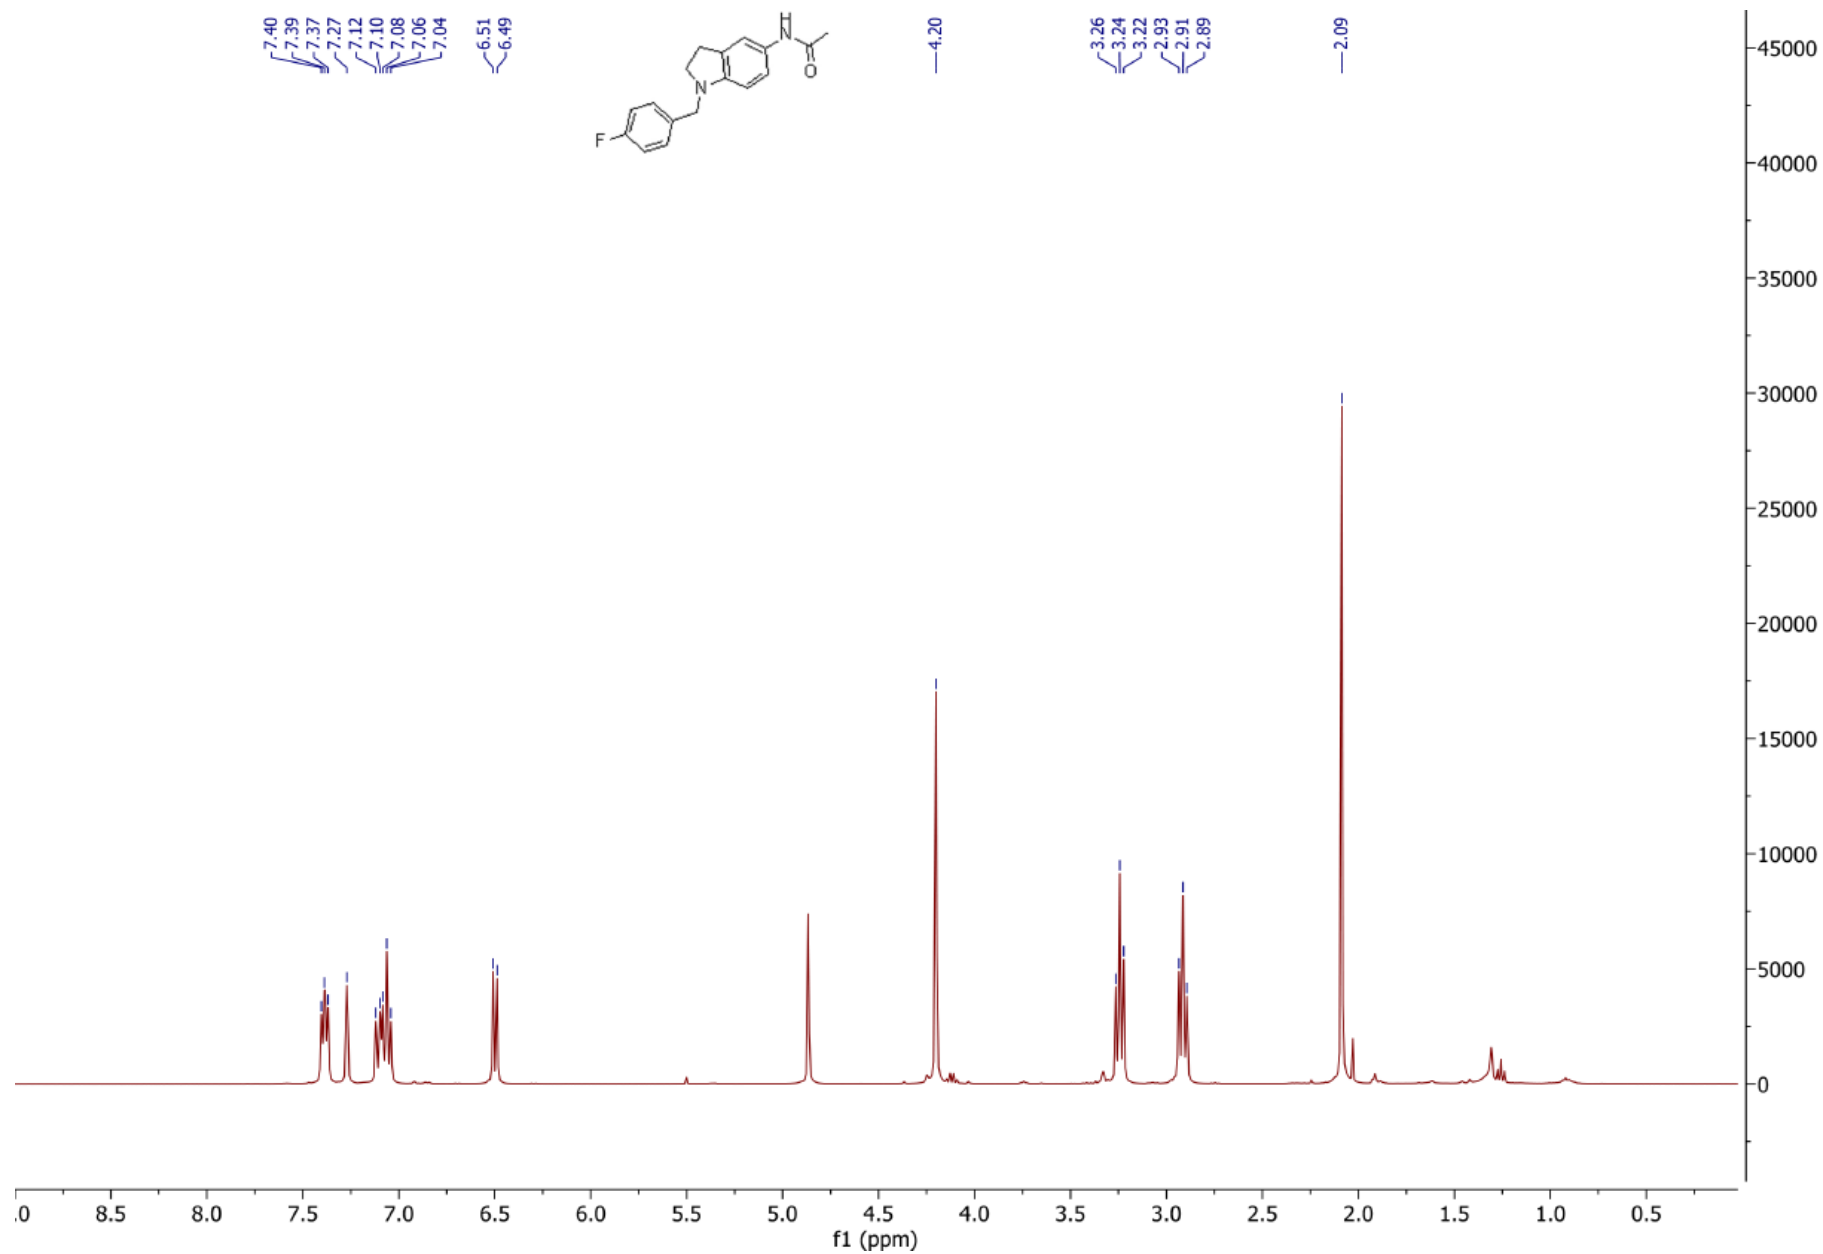

<sup>1</sup>H NMR of compound **9a**

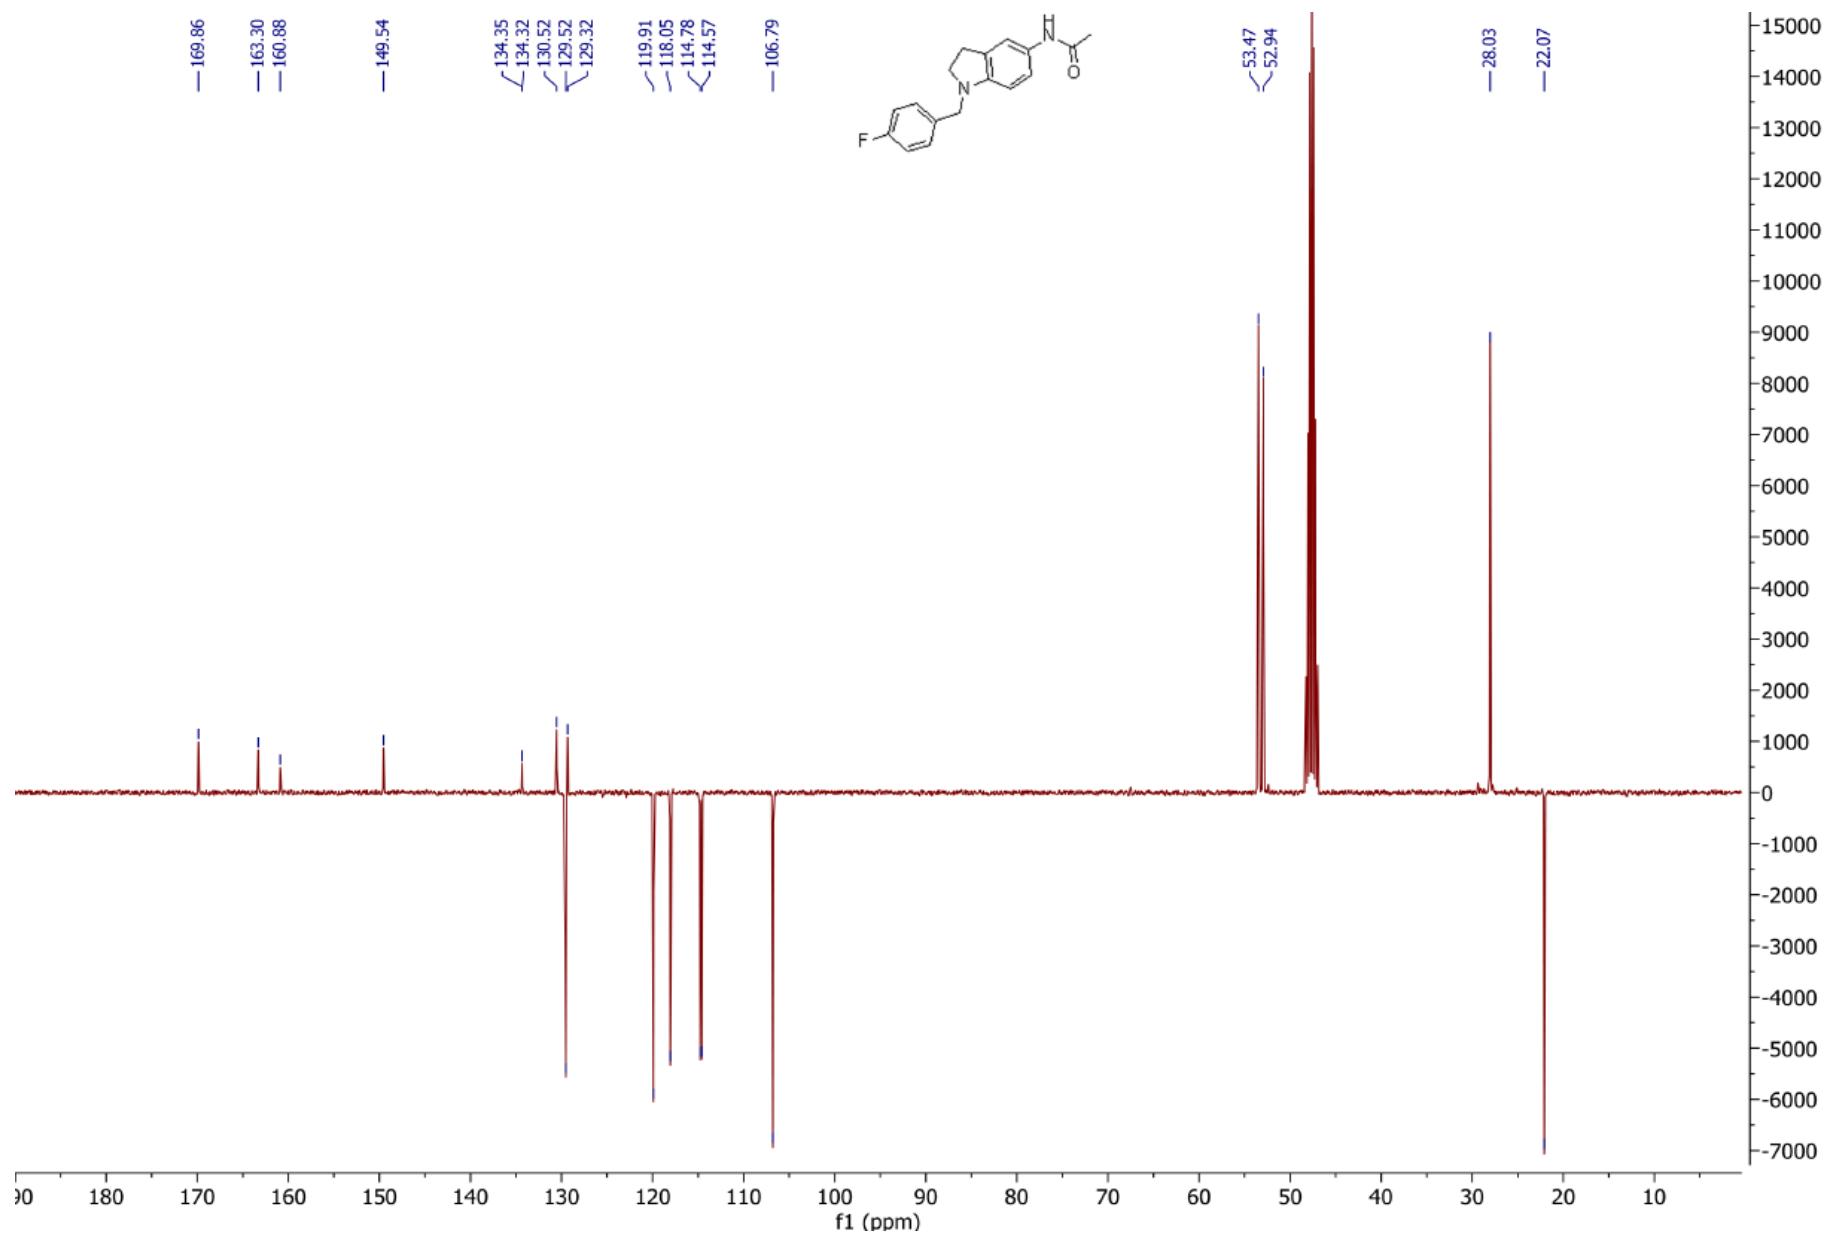

qDEPT NMR of compound **9a**

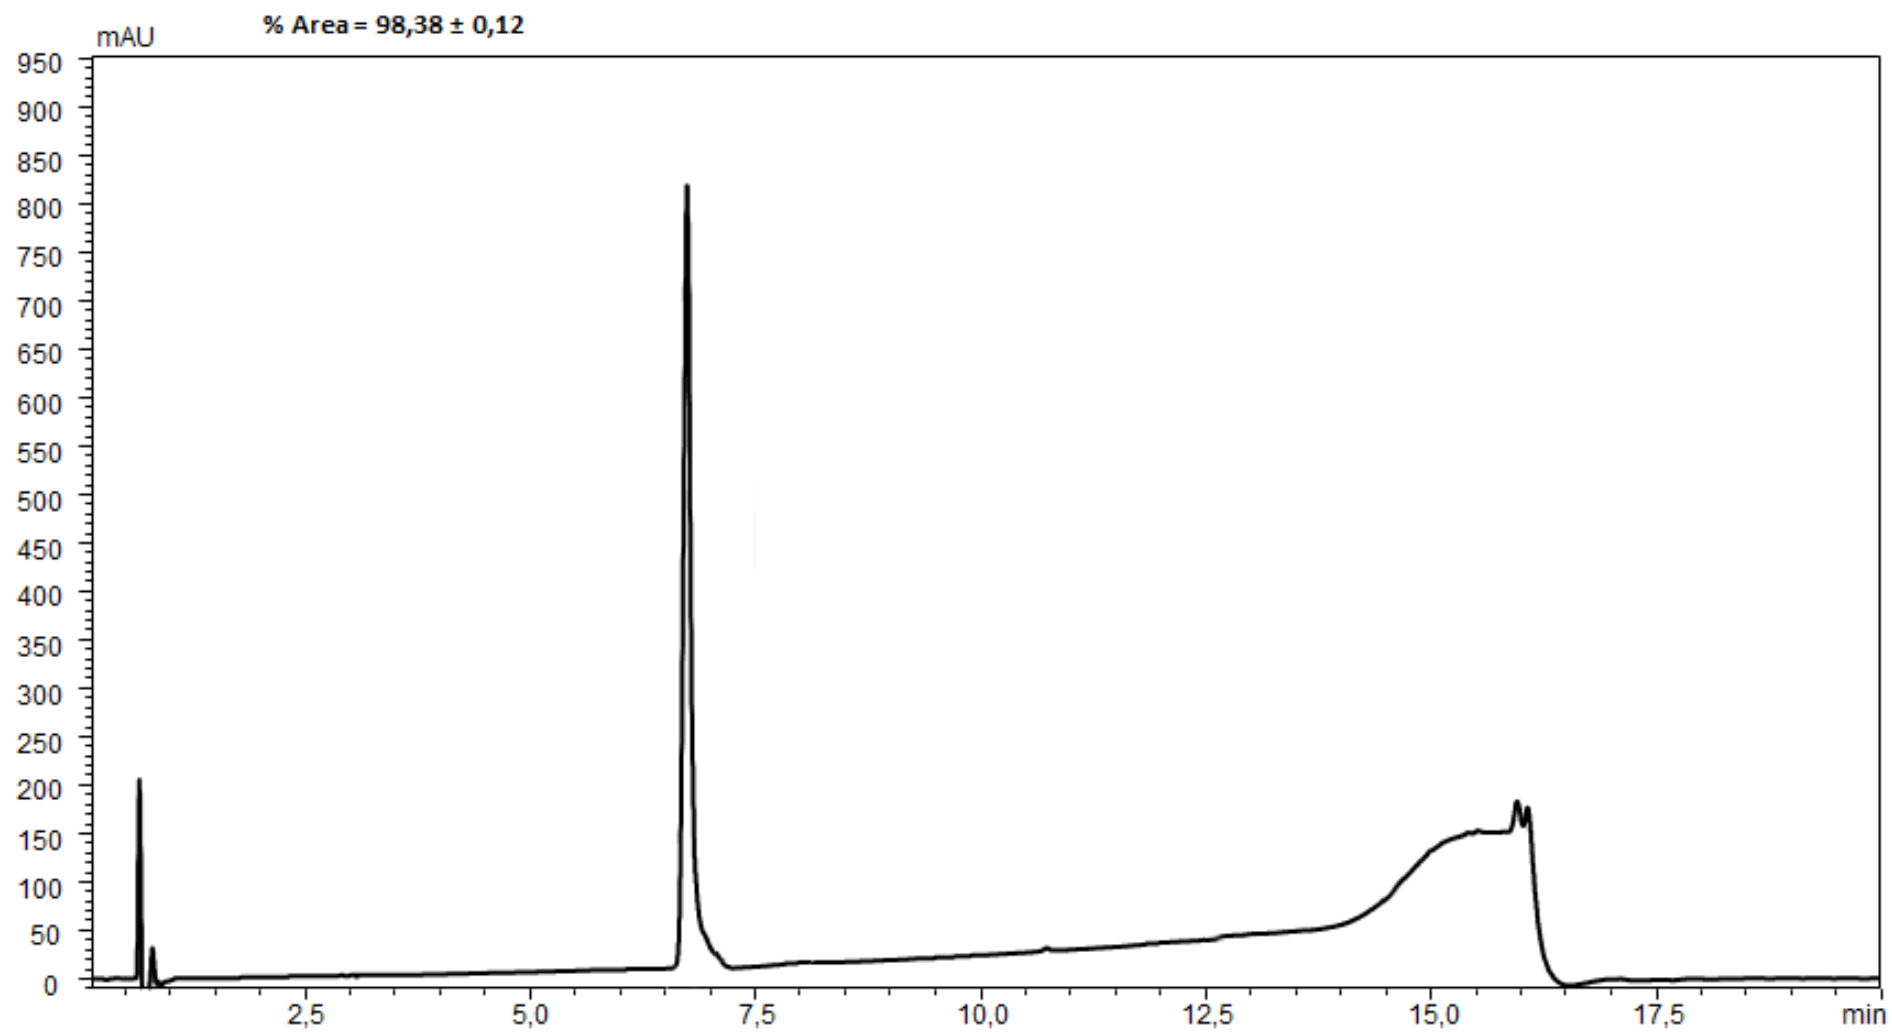

RP-HPLC of compound **9a**



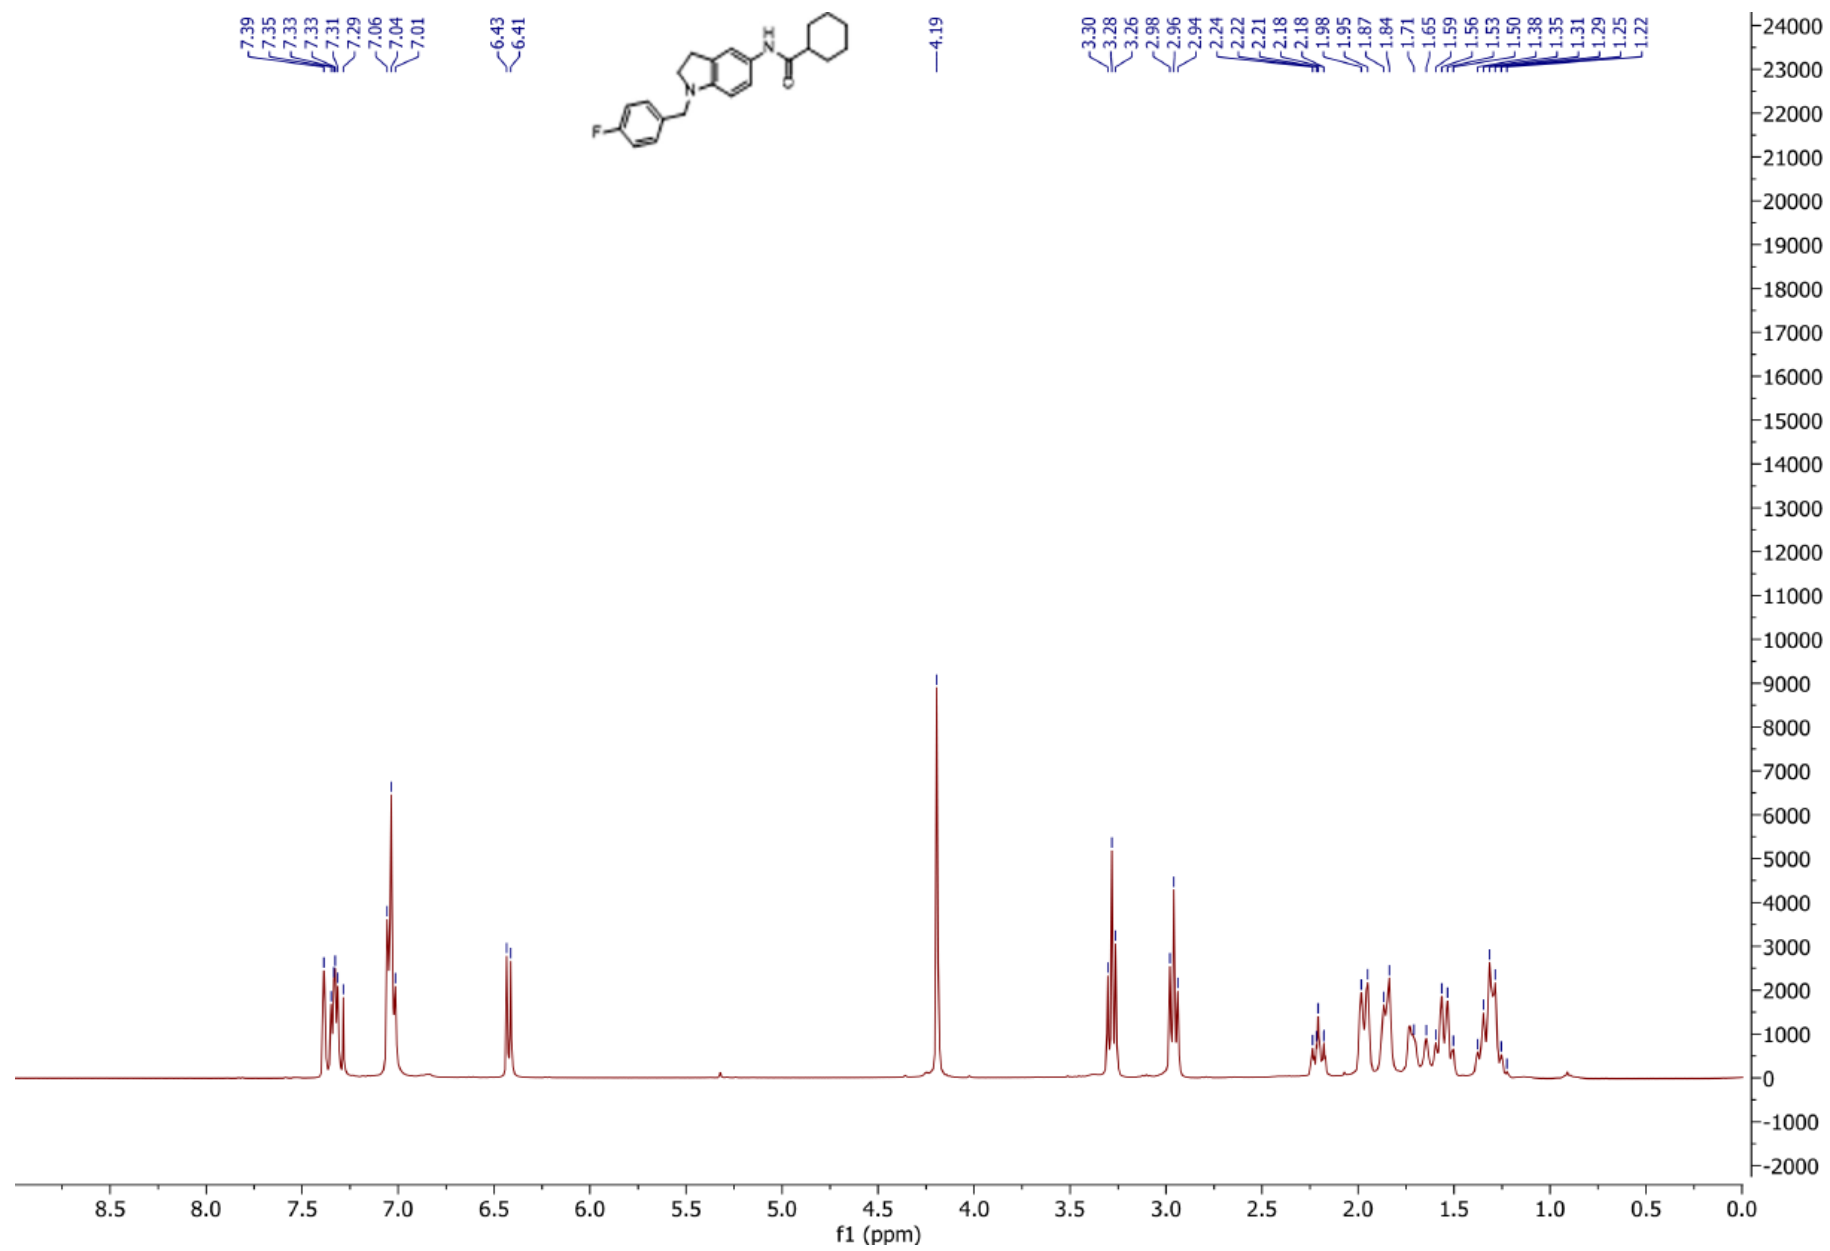

<sup>1</sup>H NMR of compound **9b**

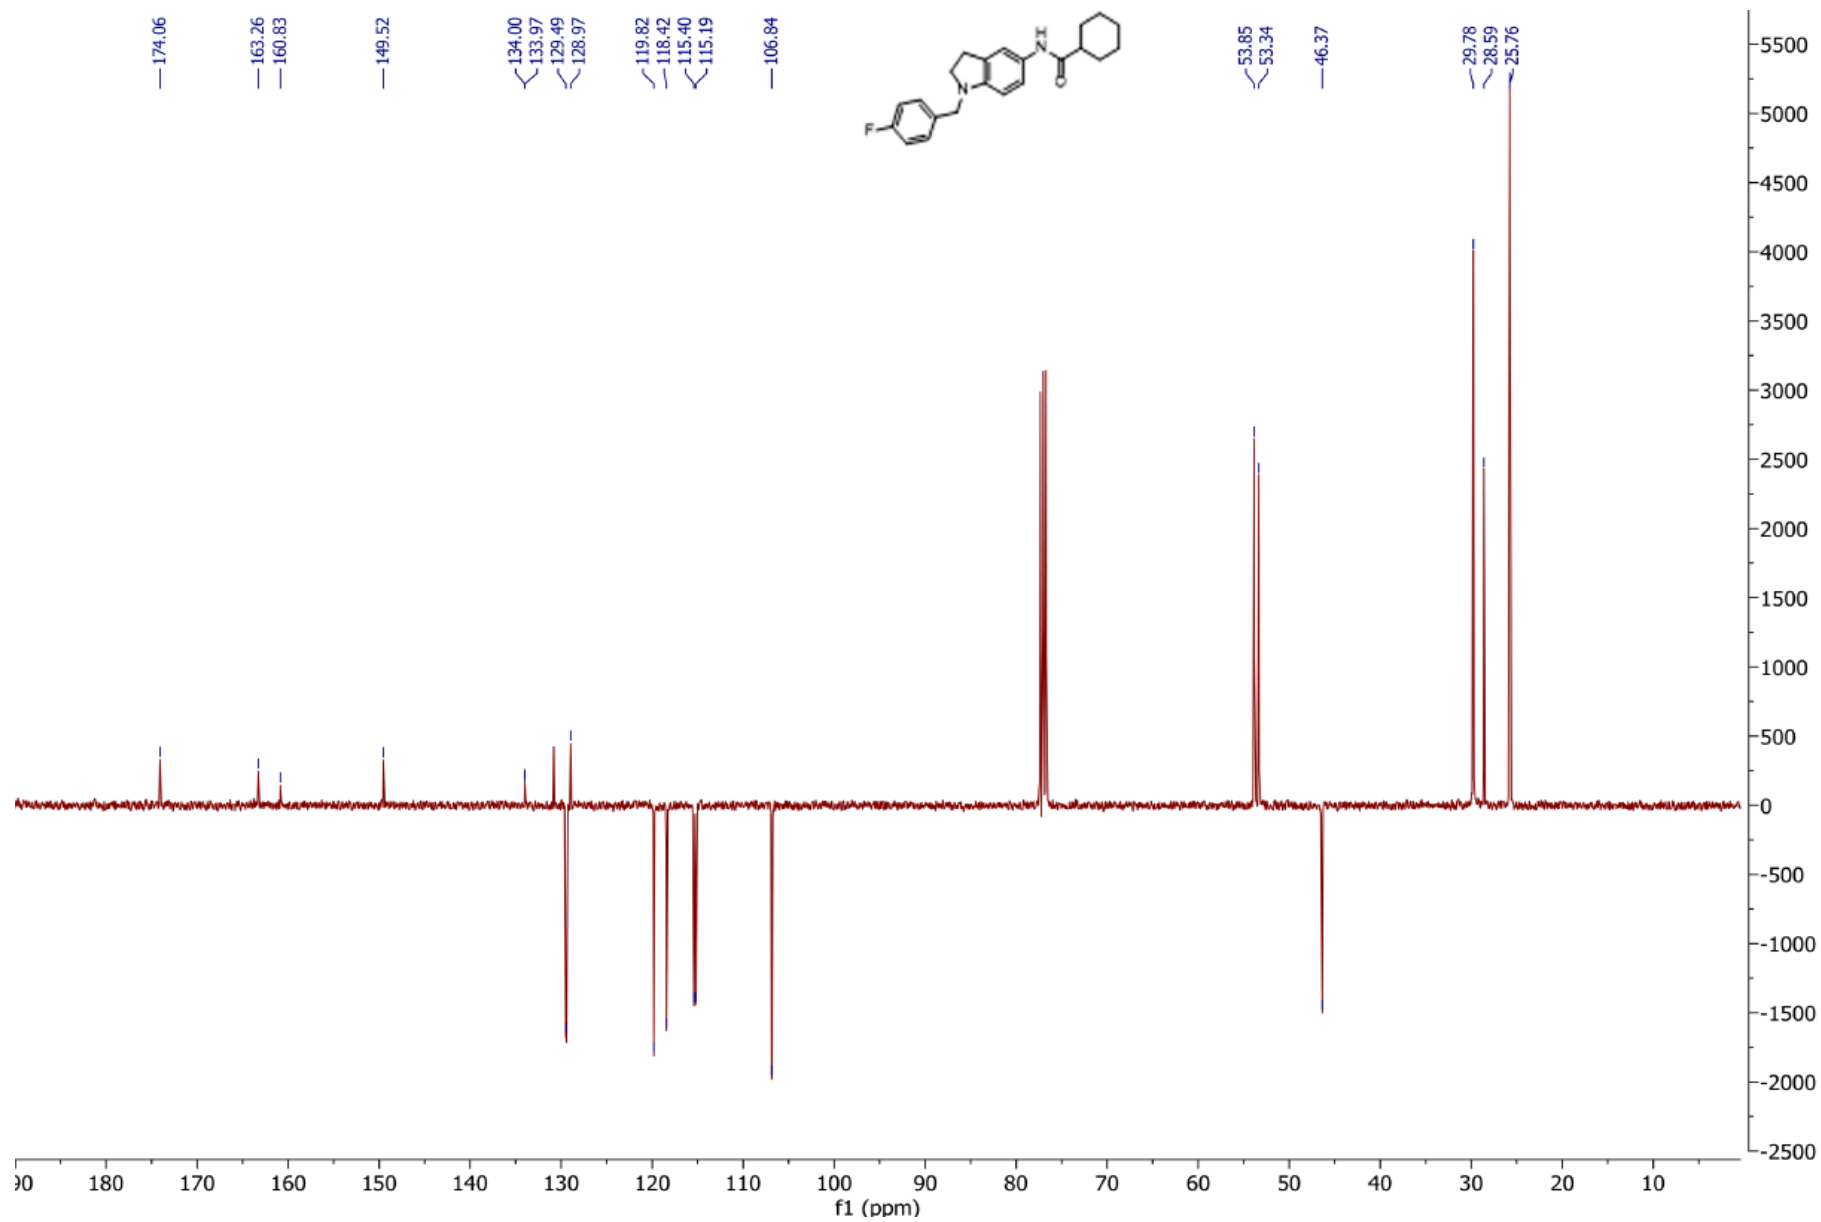

qDEPT NMR of compound **9b**

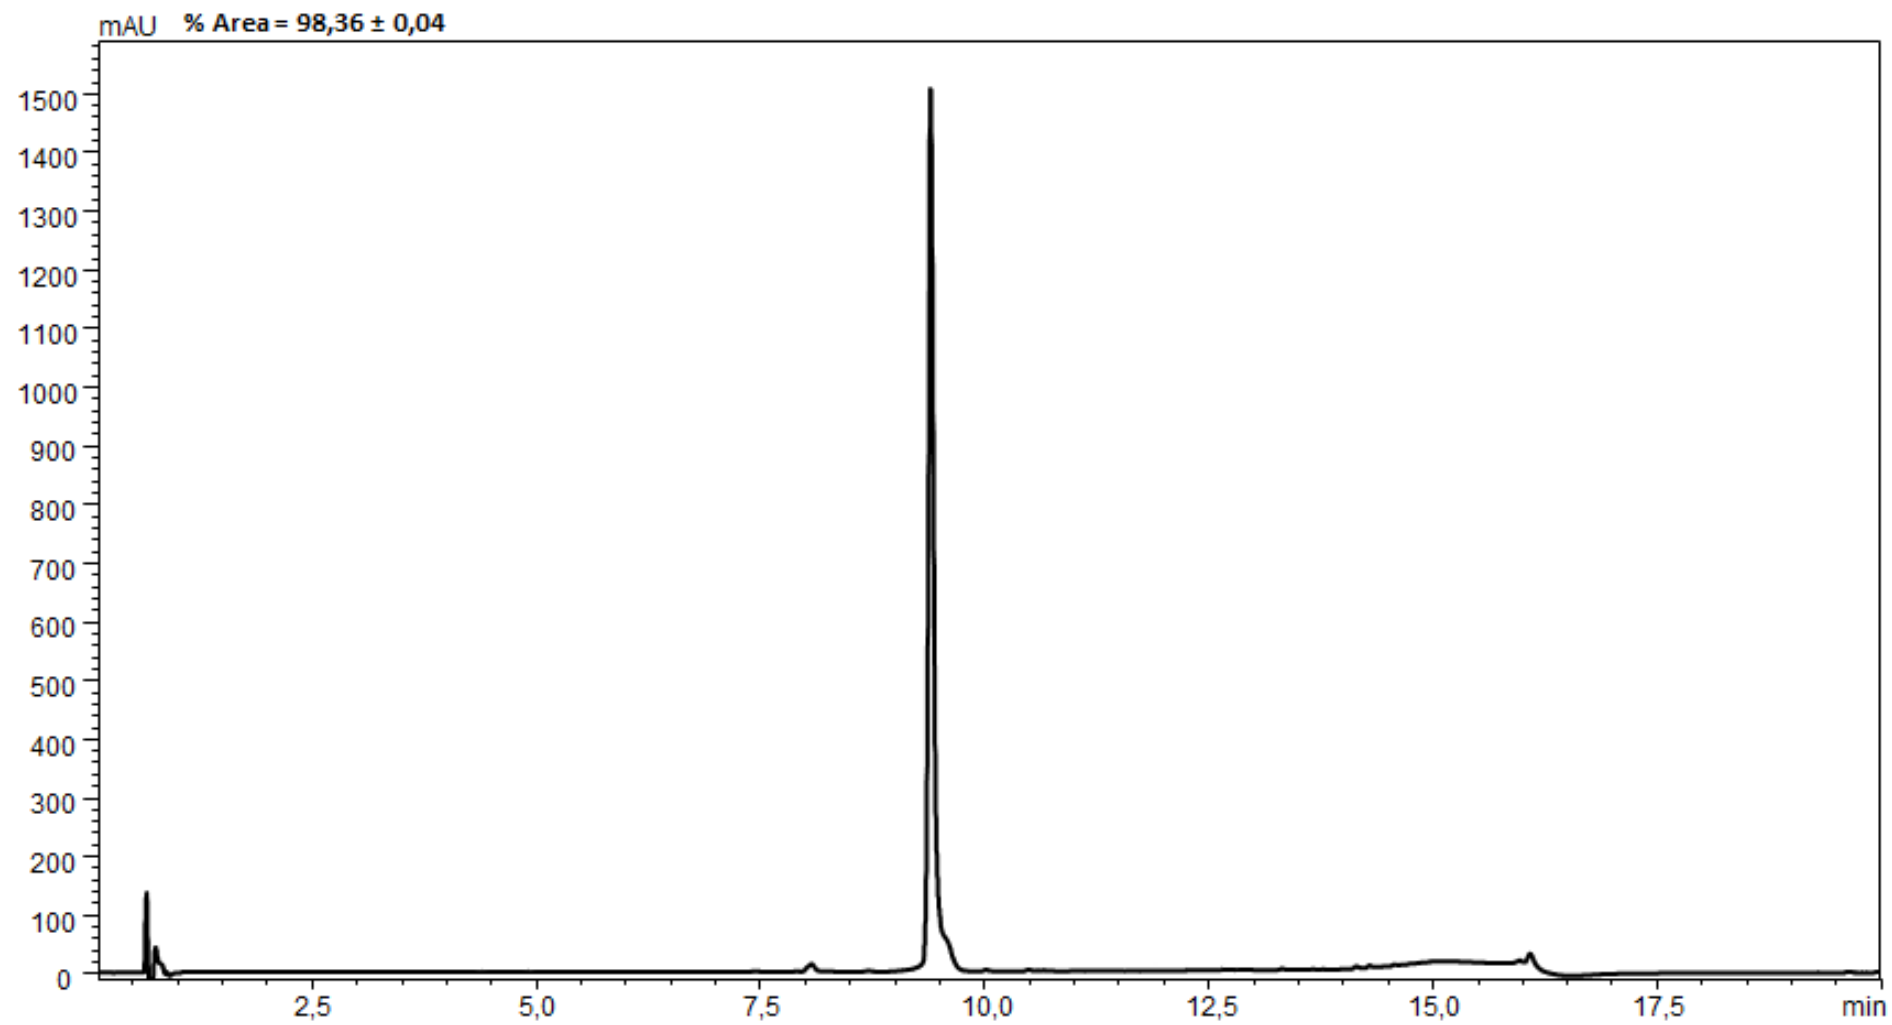

RP-HPLC trace of compound **9b**

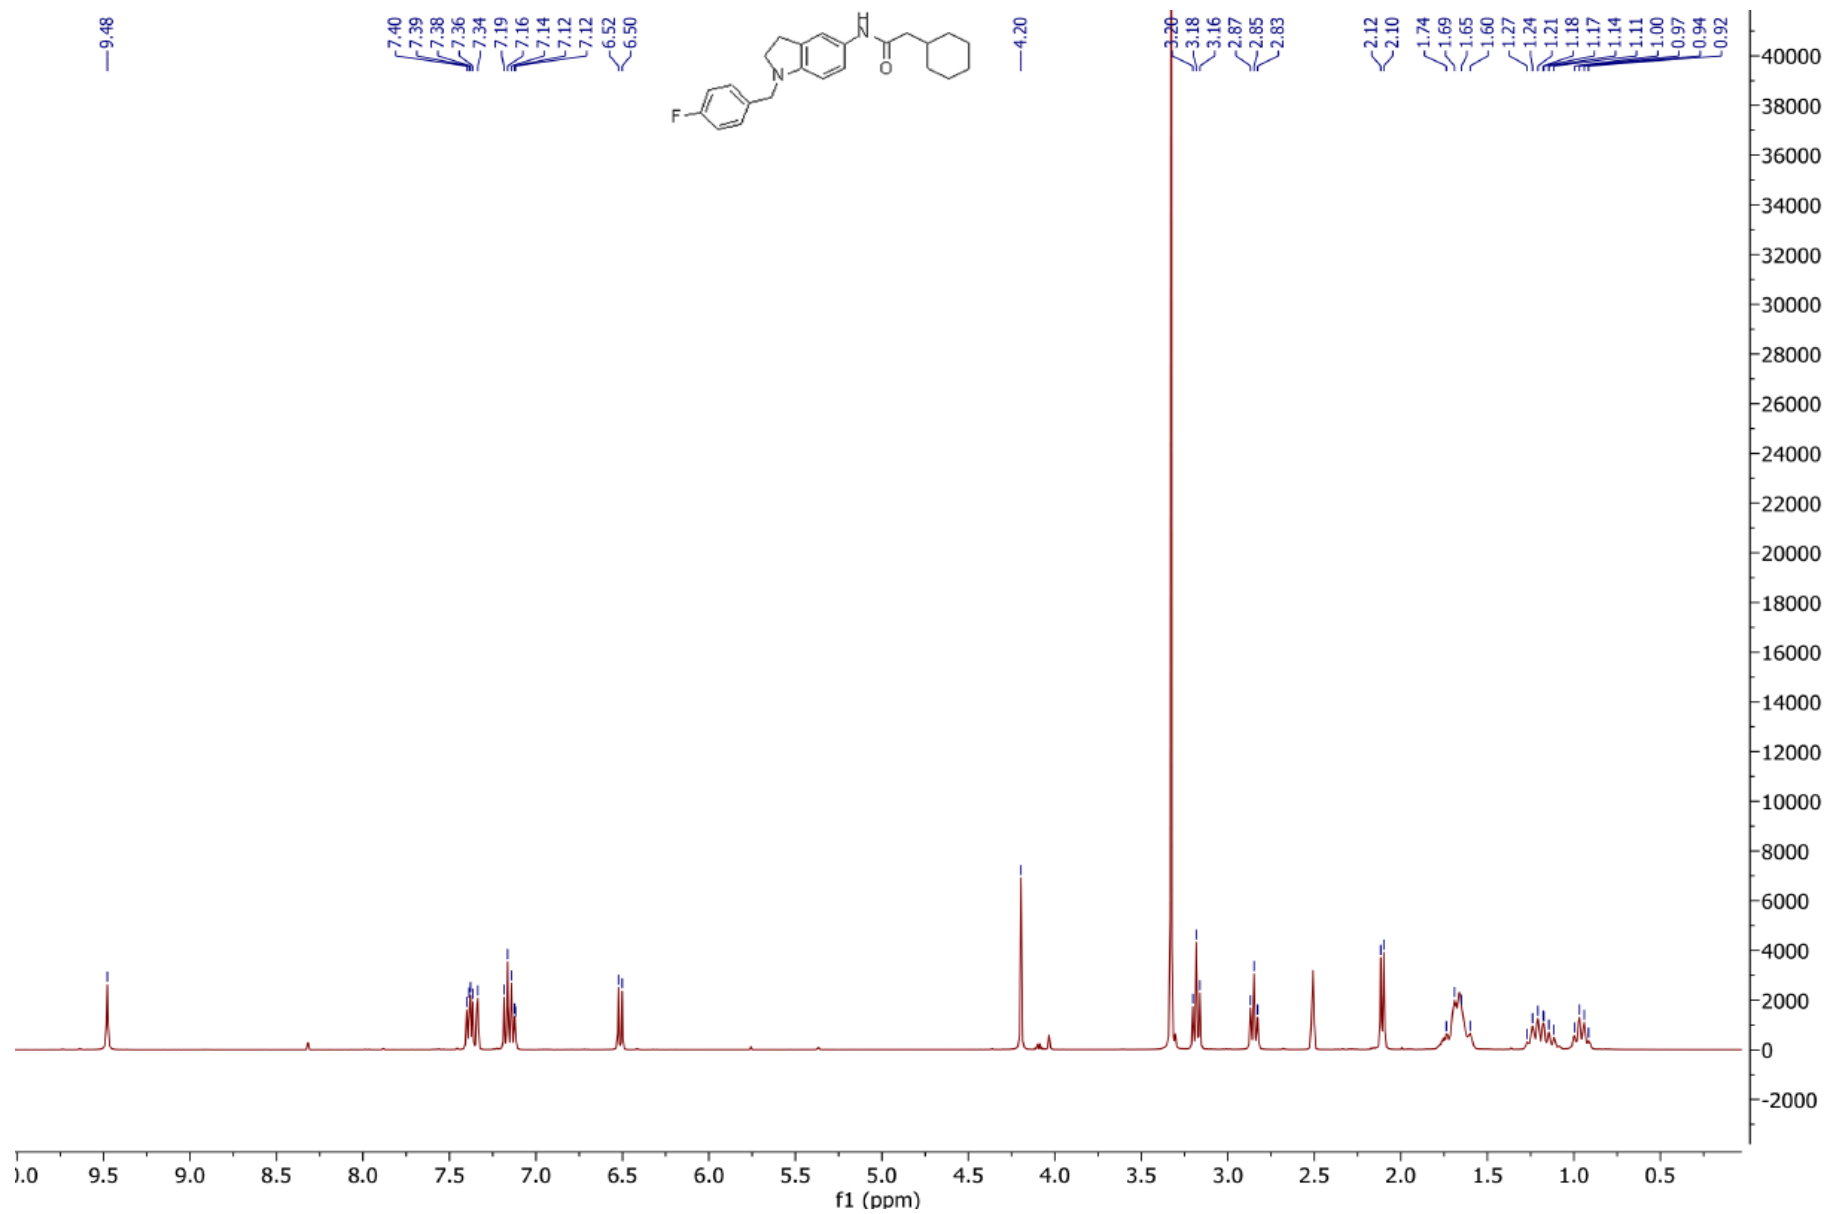

<sup>1</sup>H NMR of compound **9c**

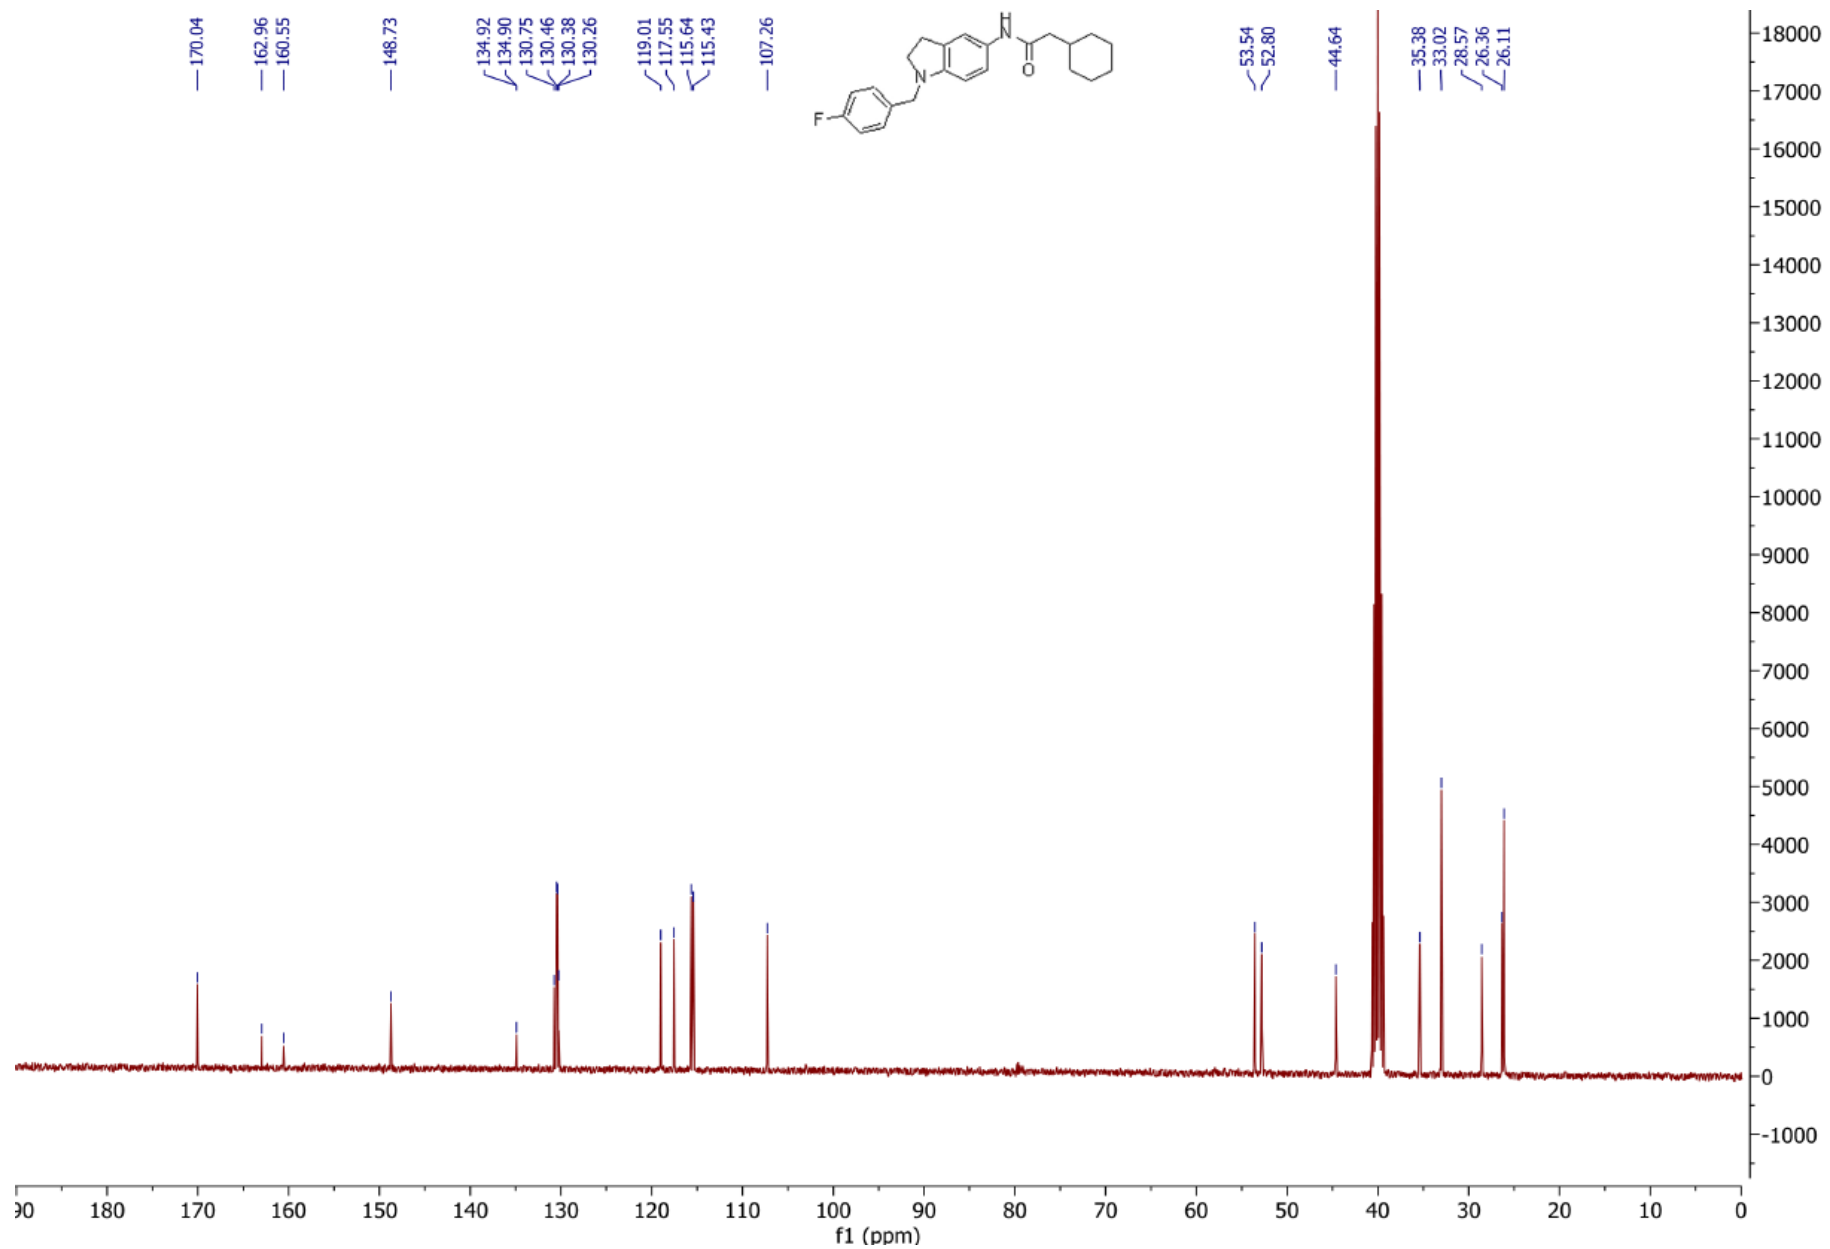

<sup>13</sup>C NMR of compound **9c**

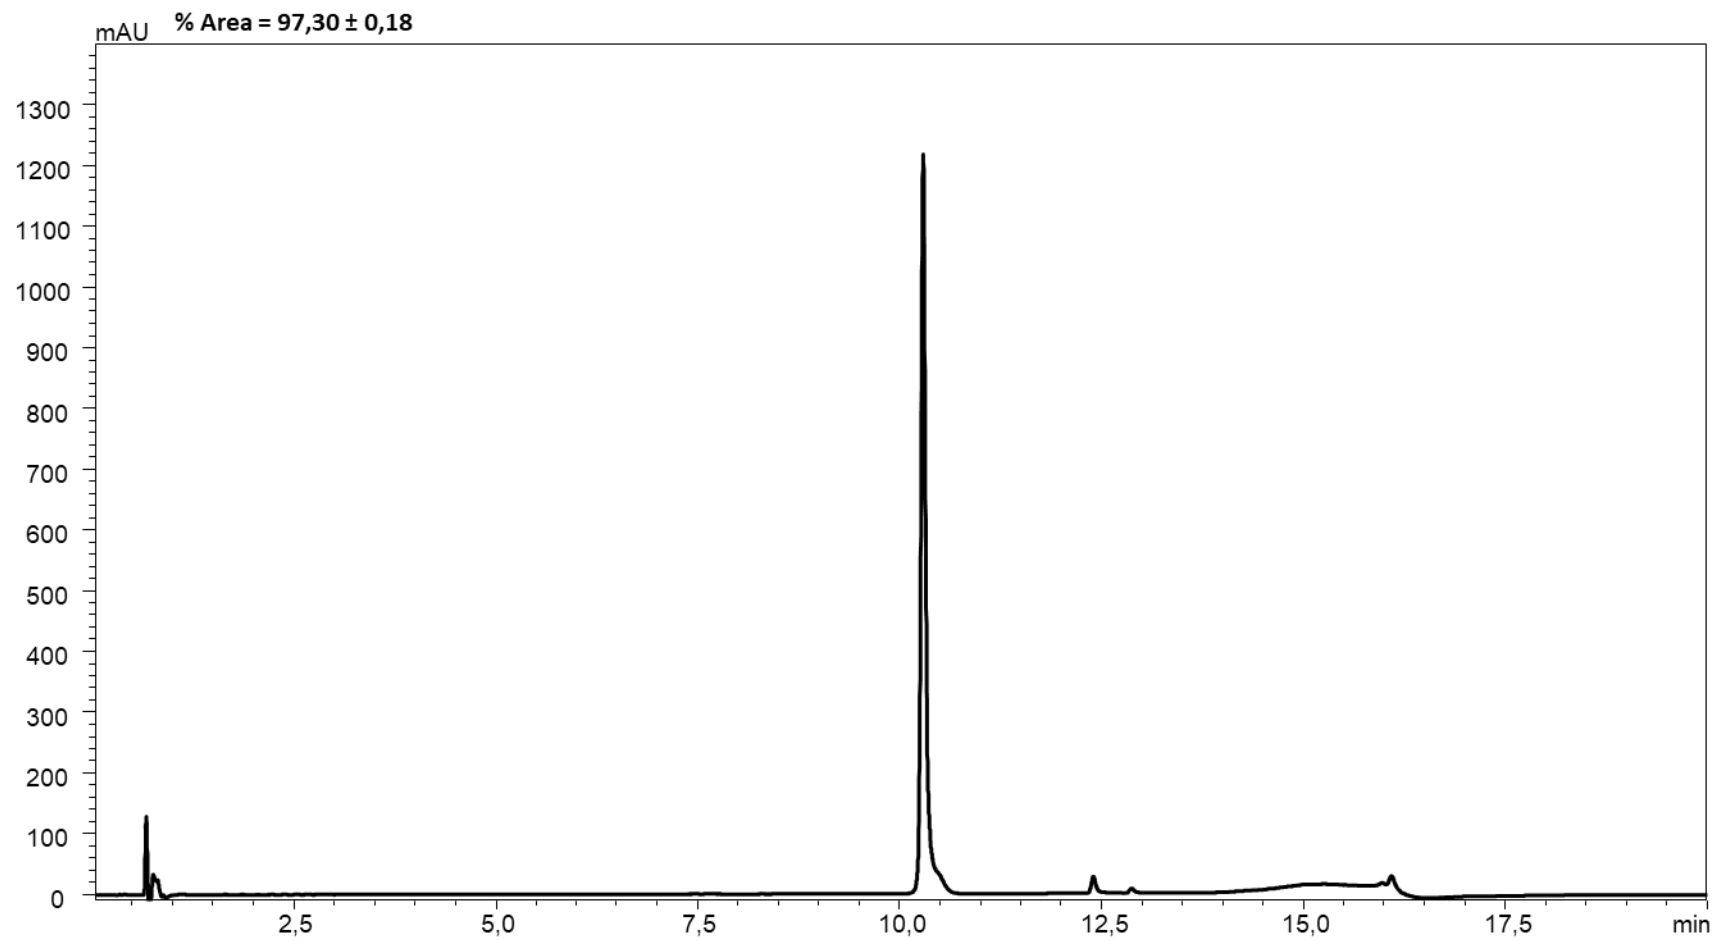

RP-HPLC trace of compound **9c**

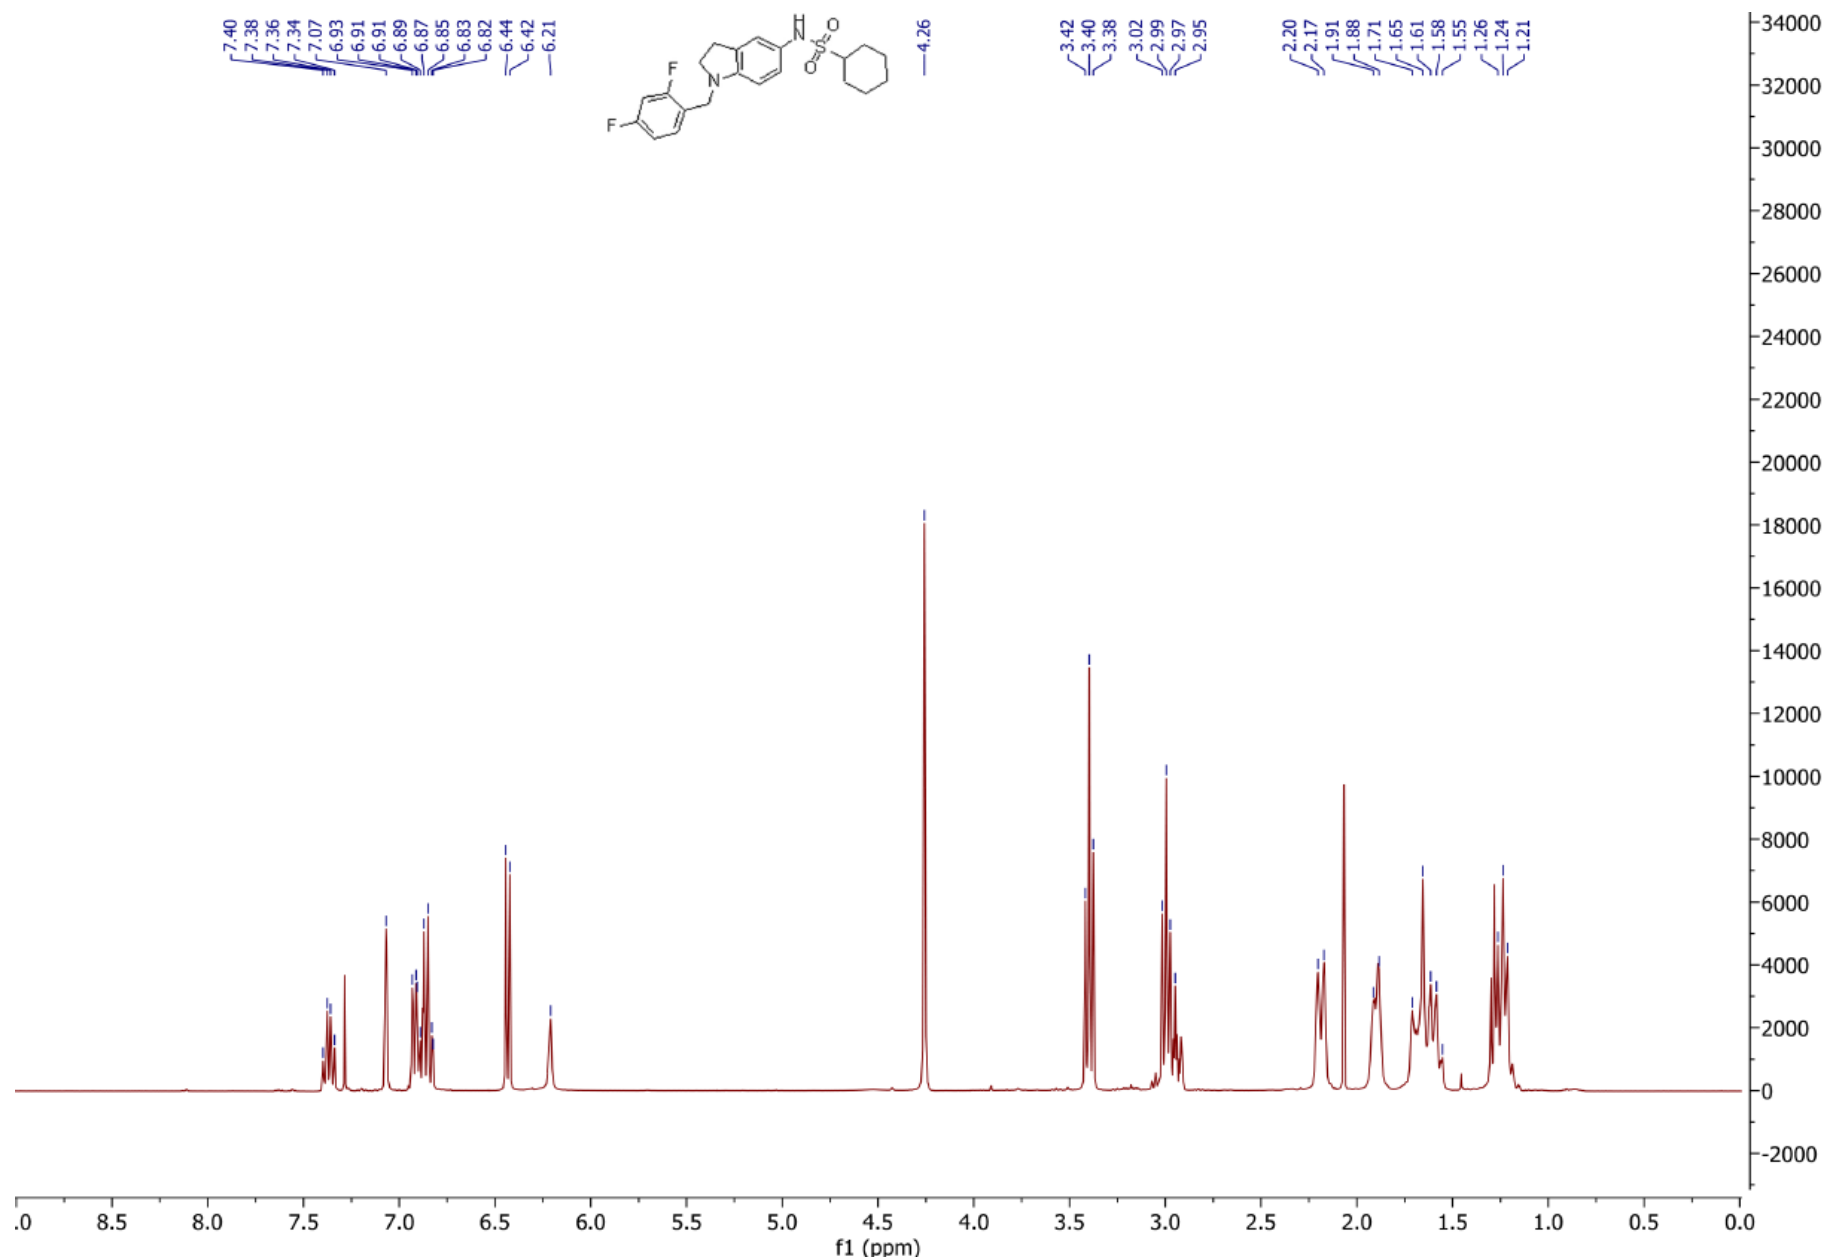

<sup>1</sup>H NMR of compound **13a**

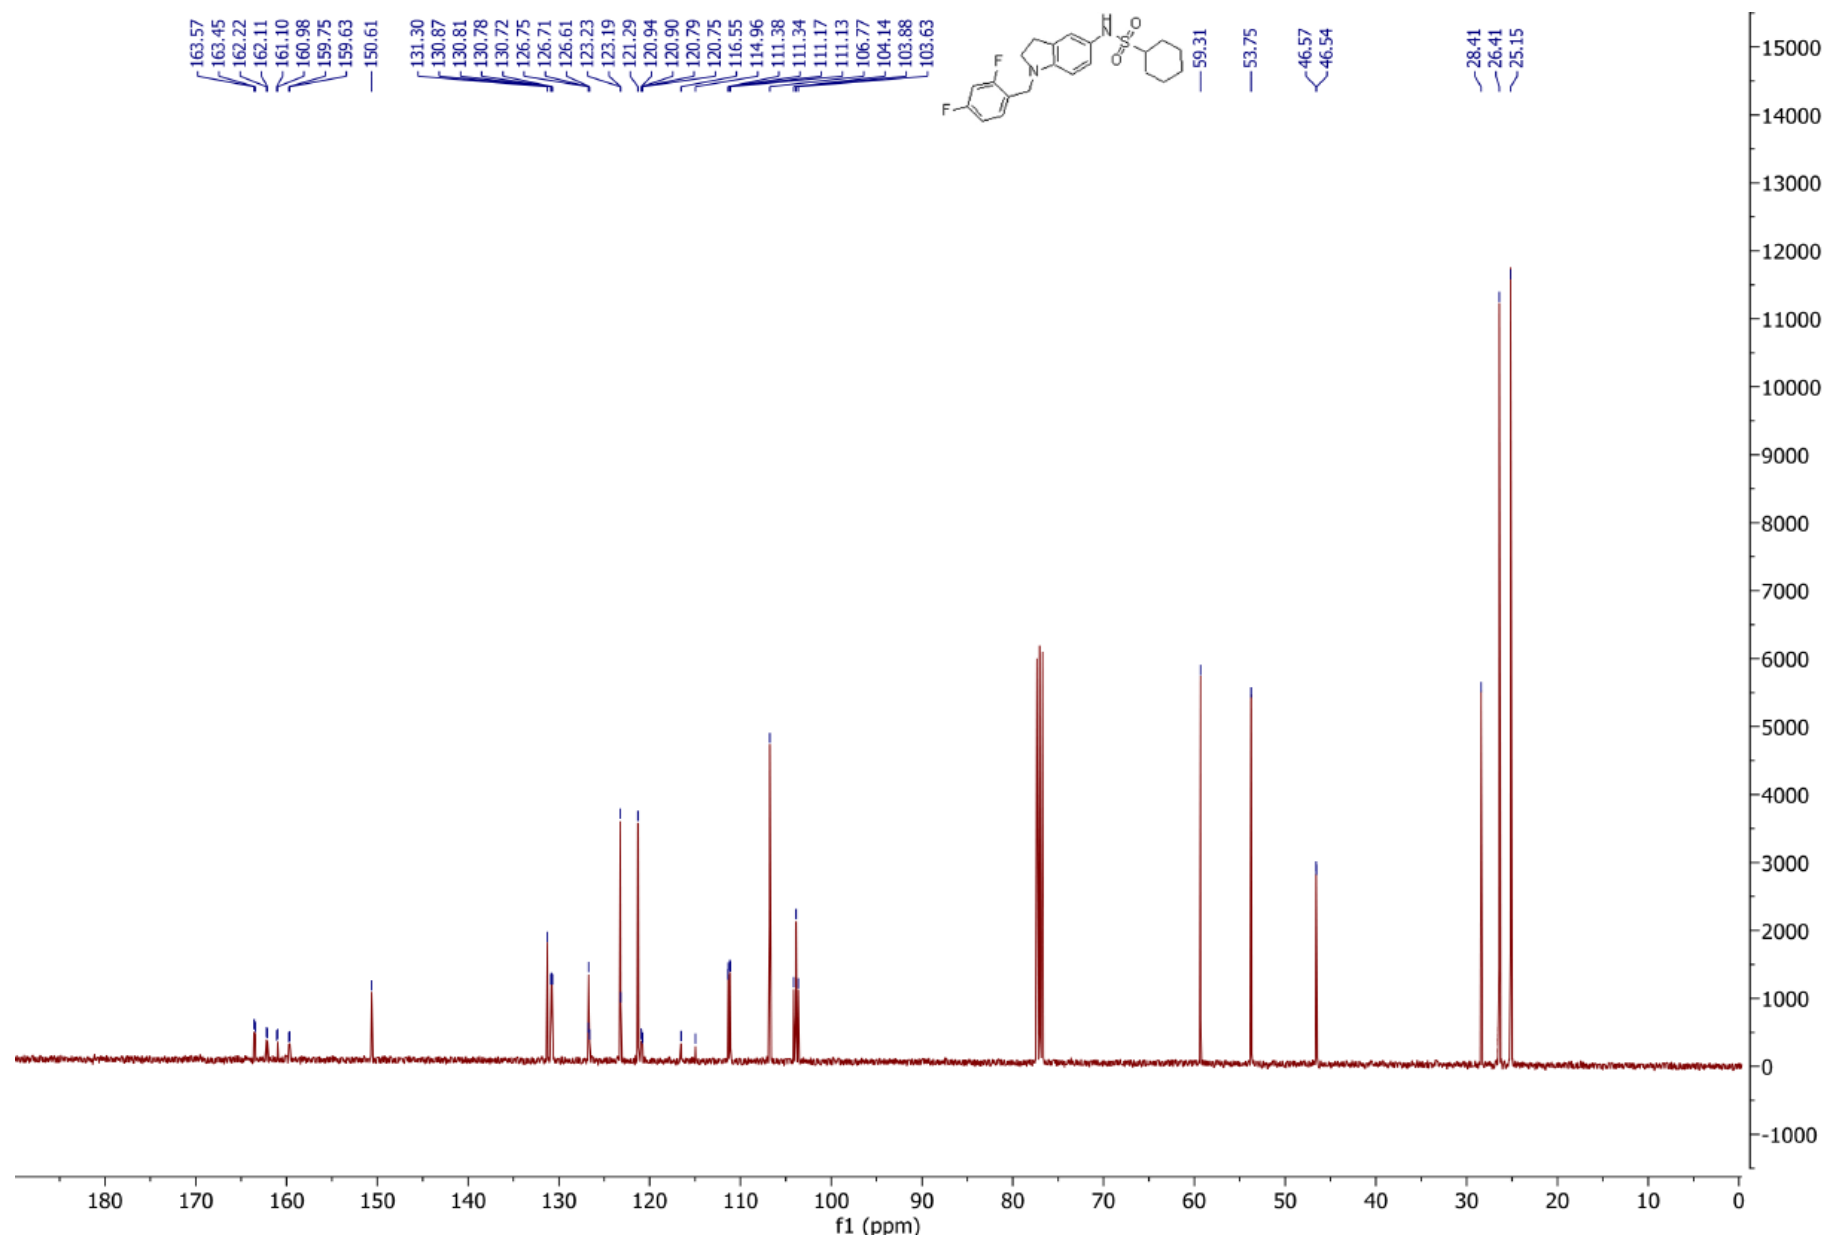

$^{13}\text{C}$  NMR of compound **13a**



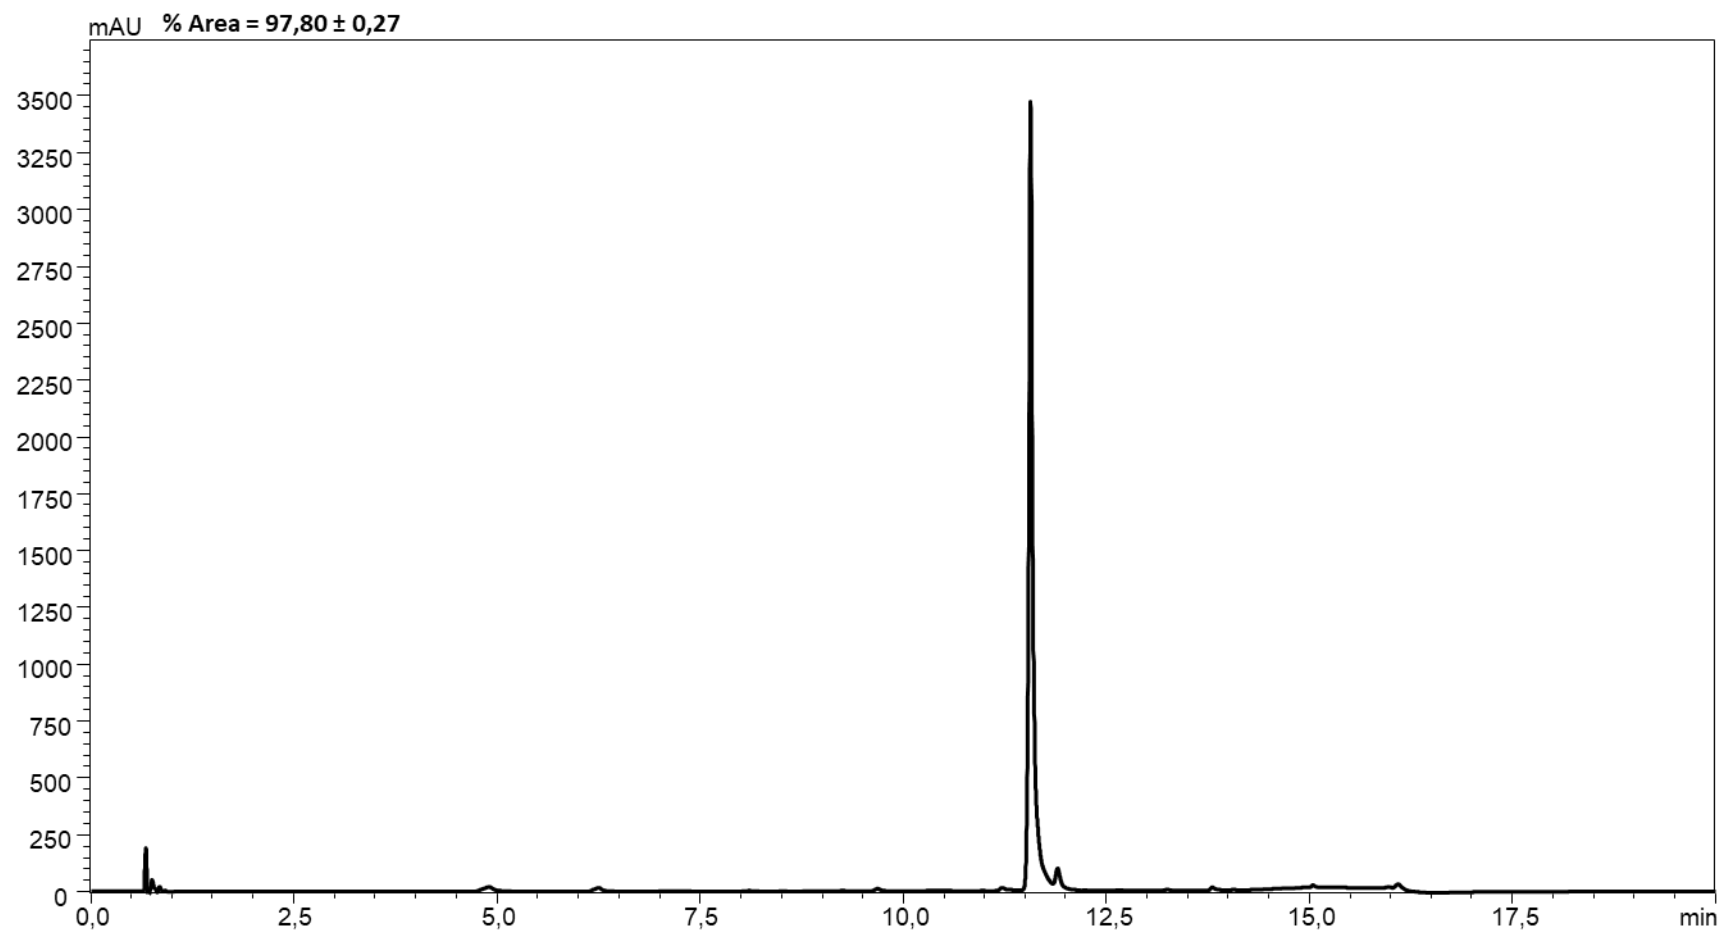

RP-HPLC trace of compound **13a**

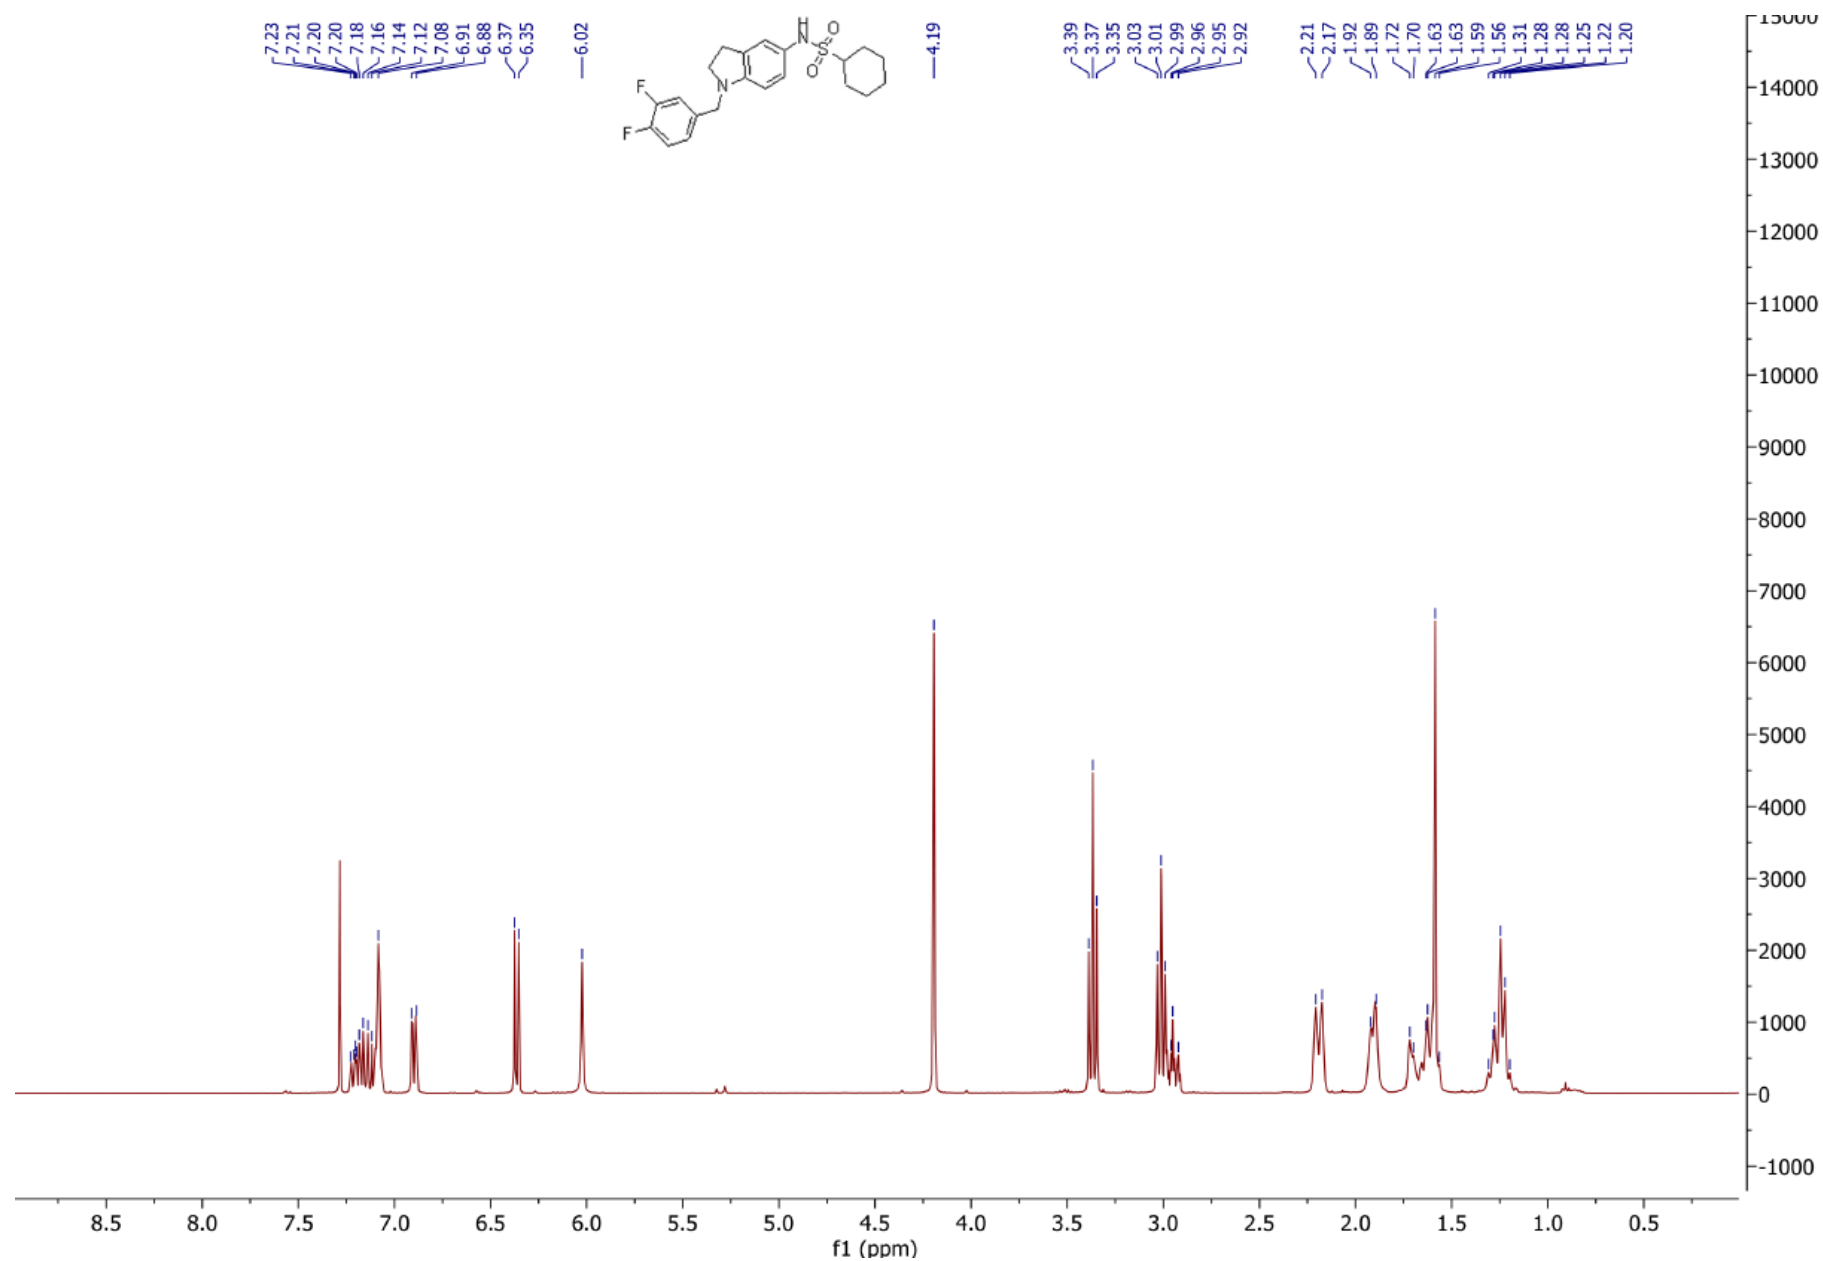

<sup>1</sup>H NMR of compound **13b**

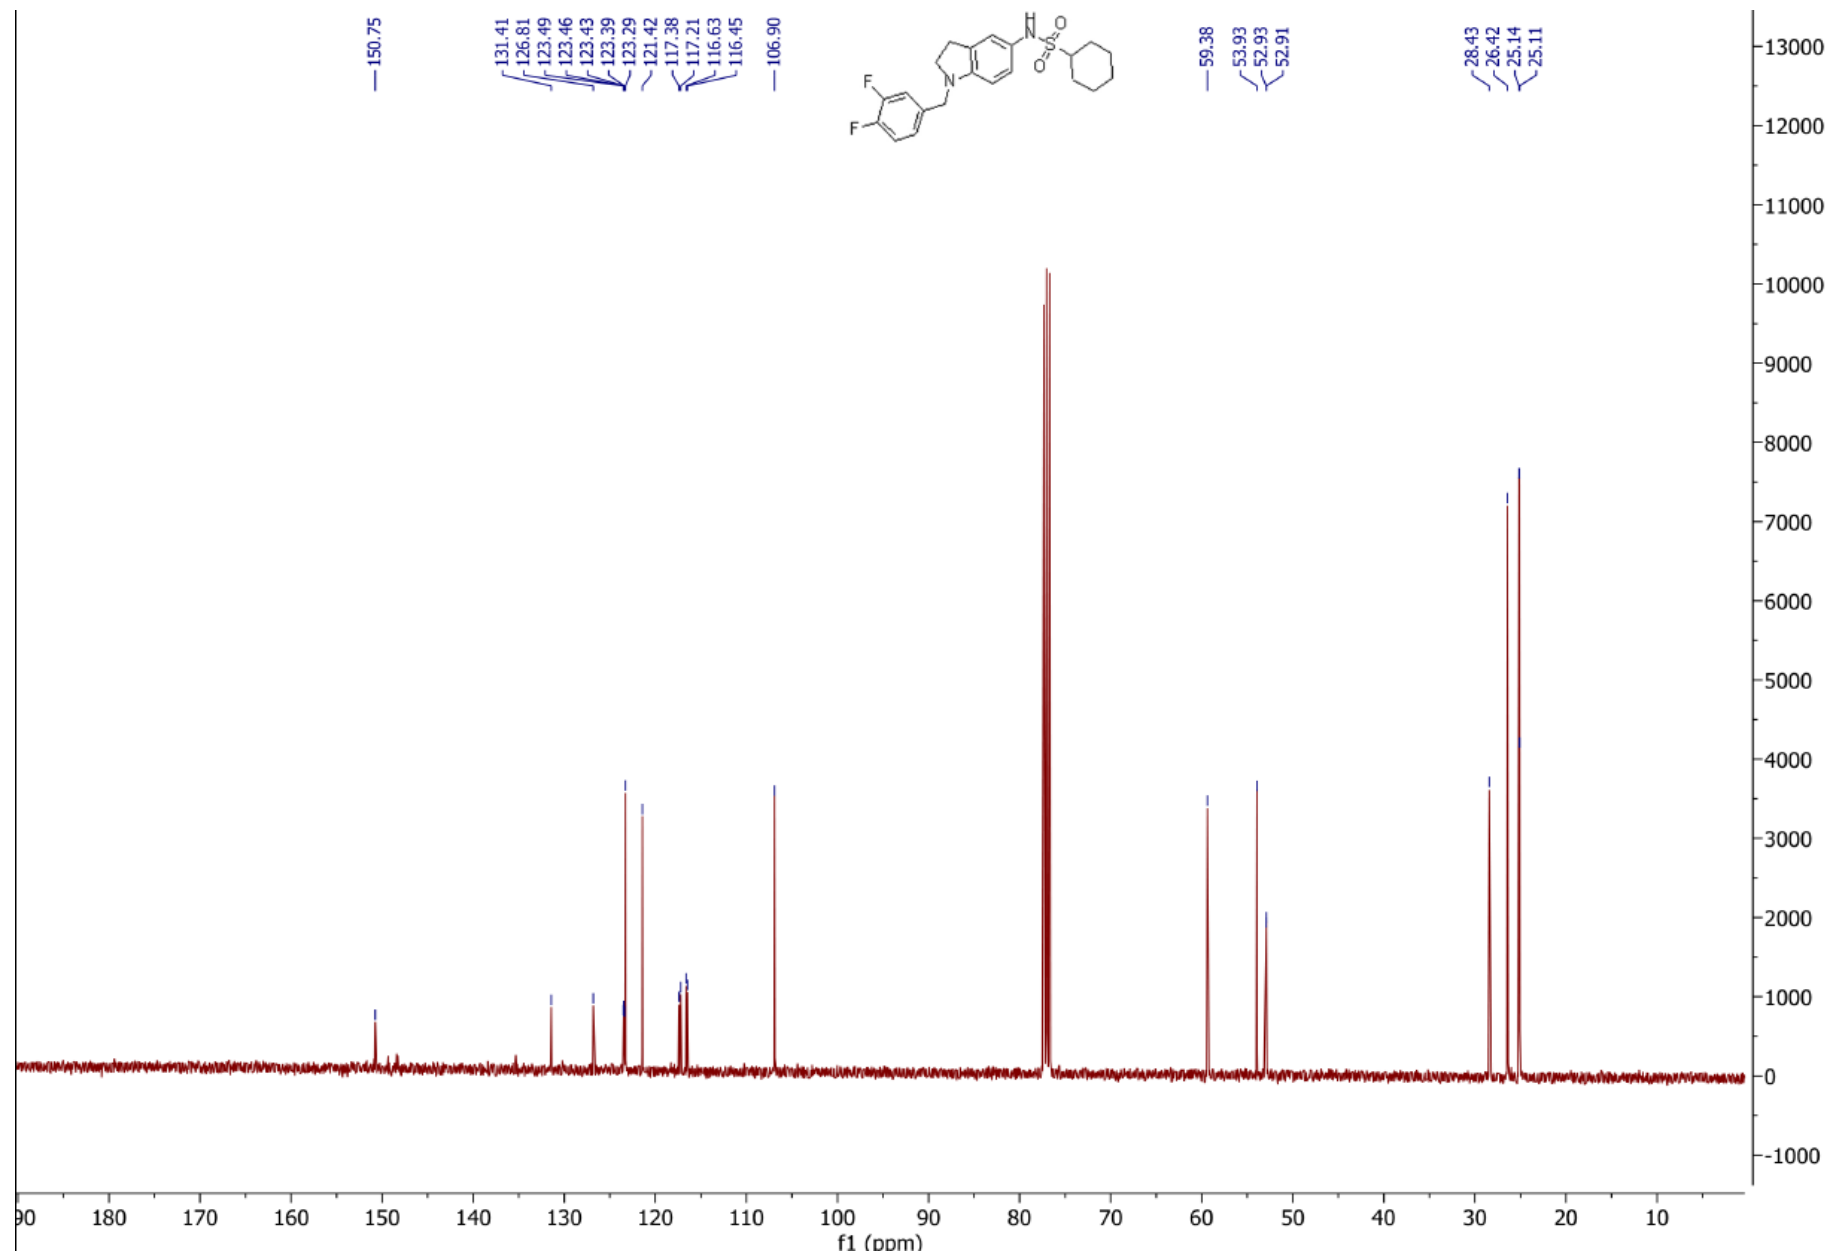

<sup>13</sup>C NMR of compound **13b**

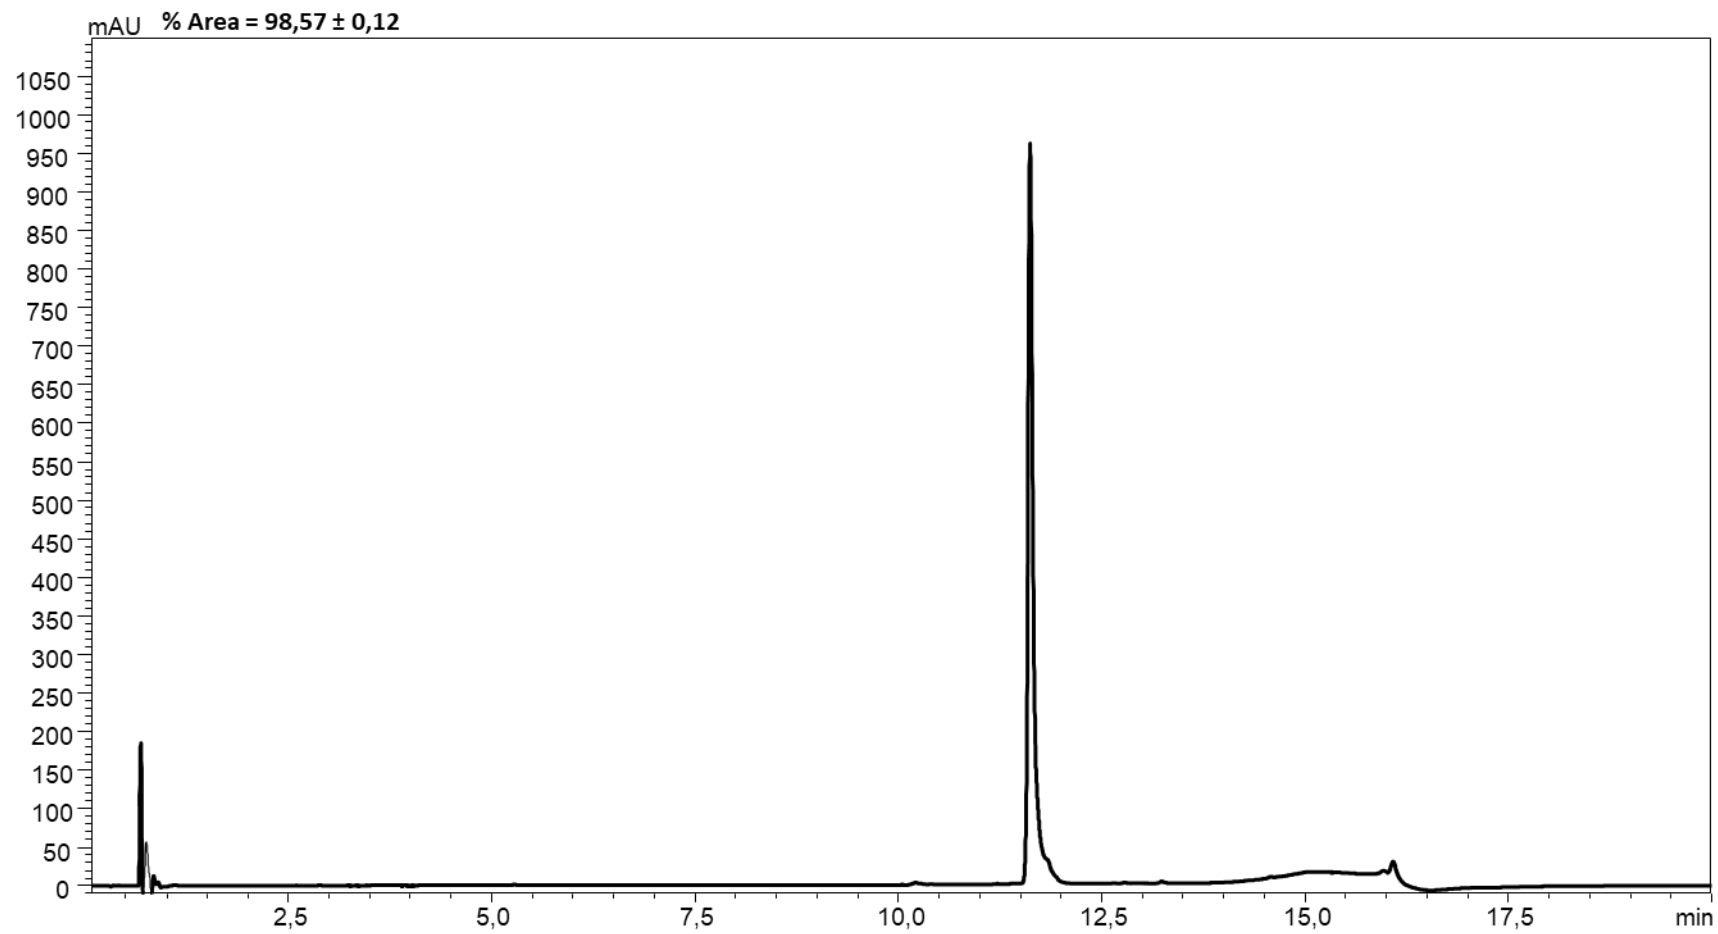

RP-HPLC trace of compound **13b**

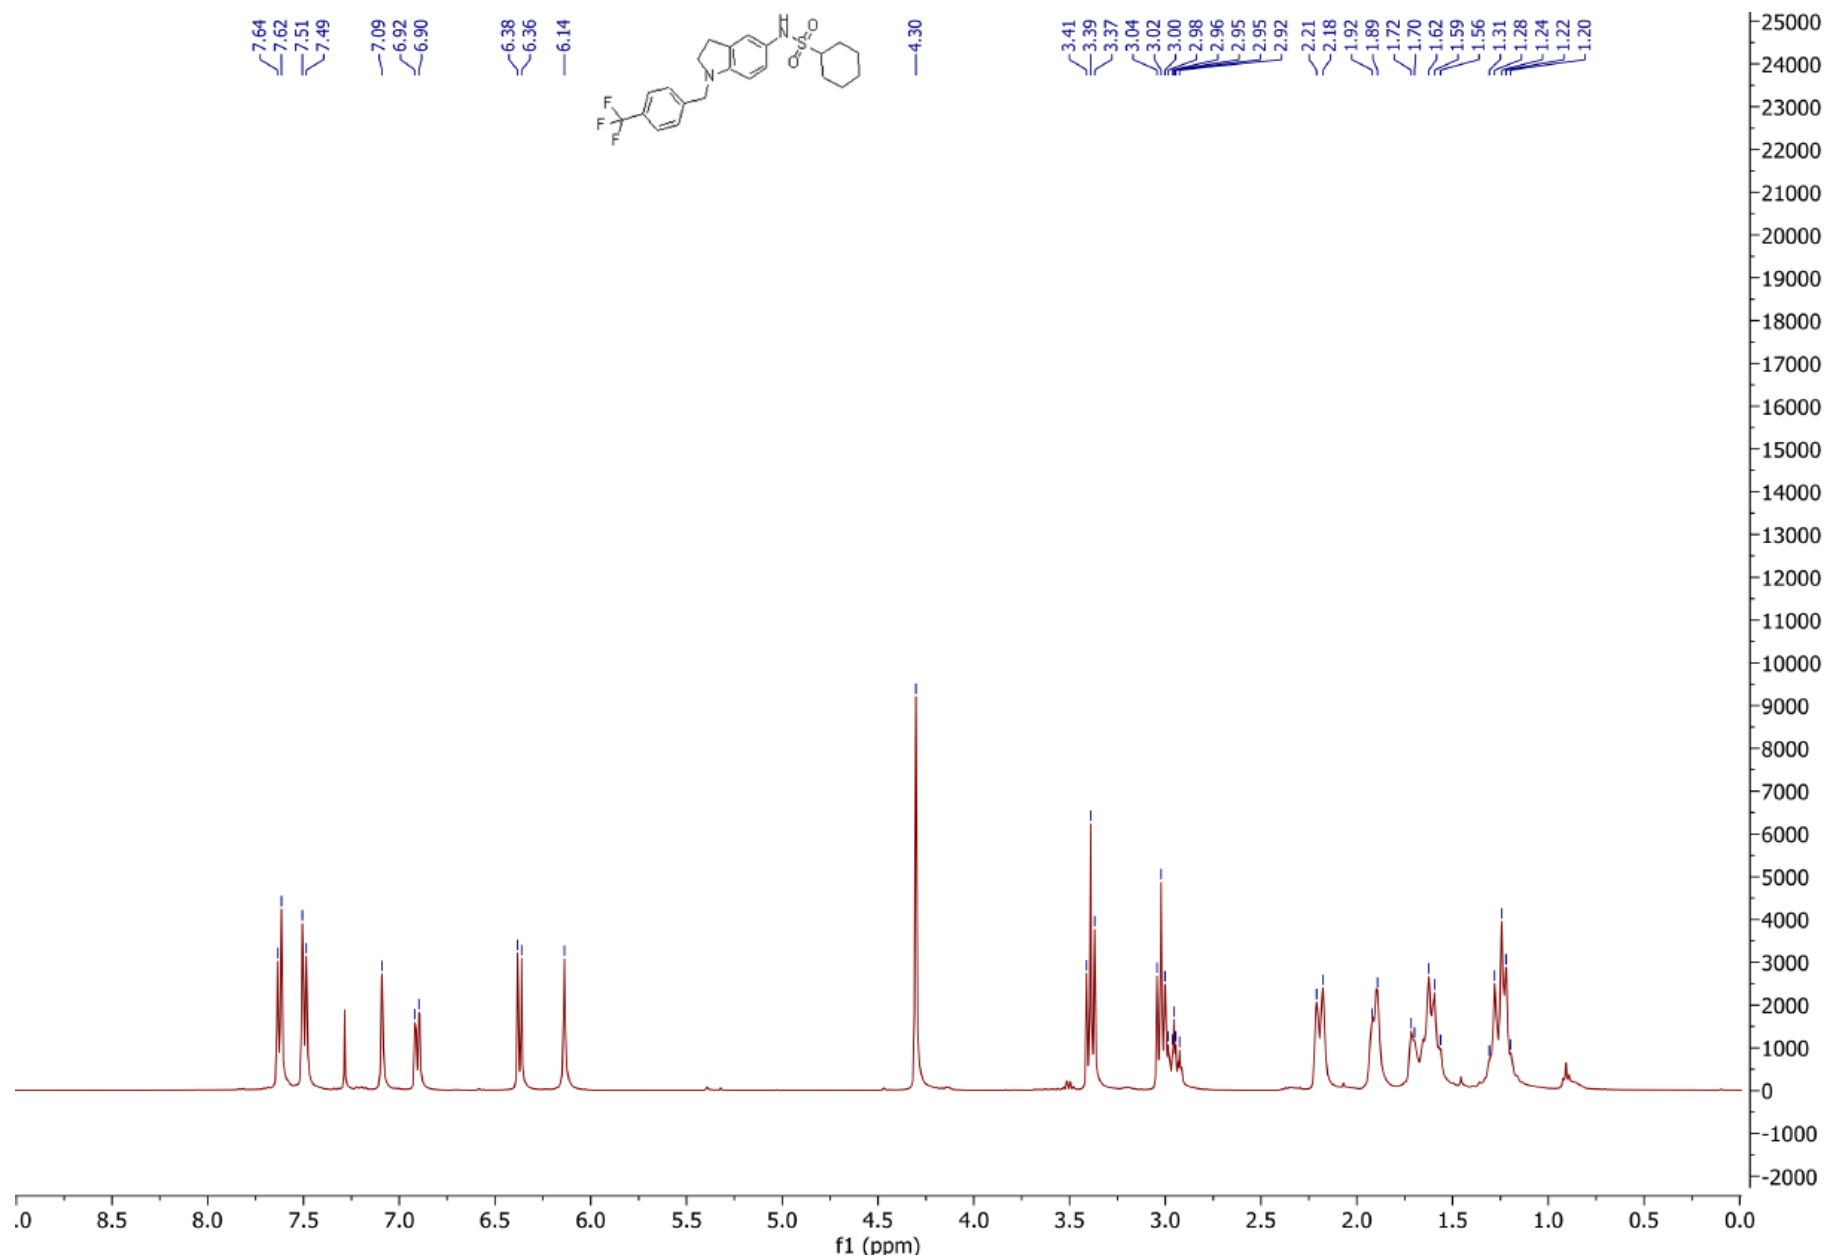

<sup>1</sup>H NMR of compound **13c**

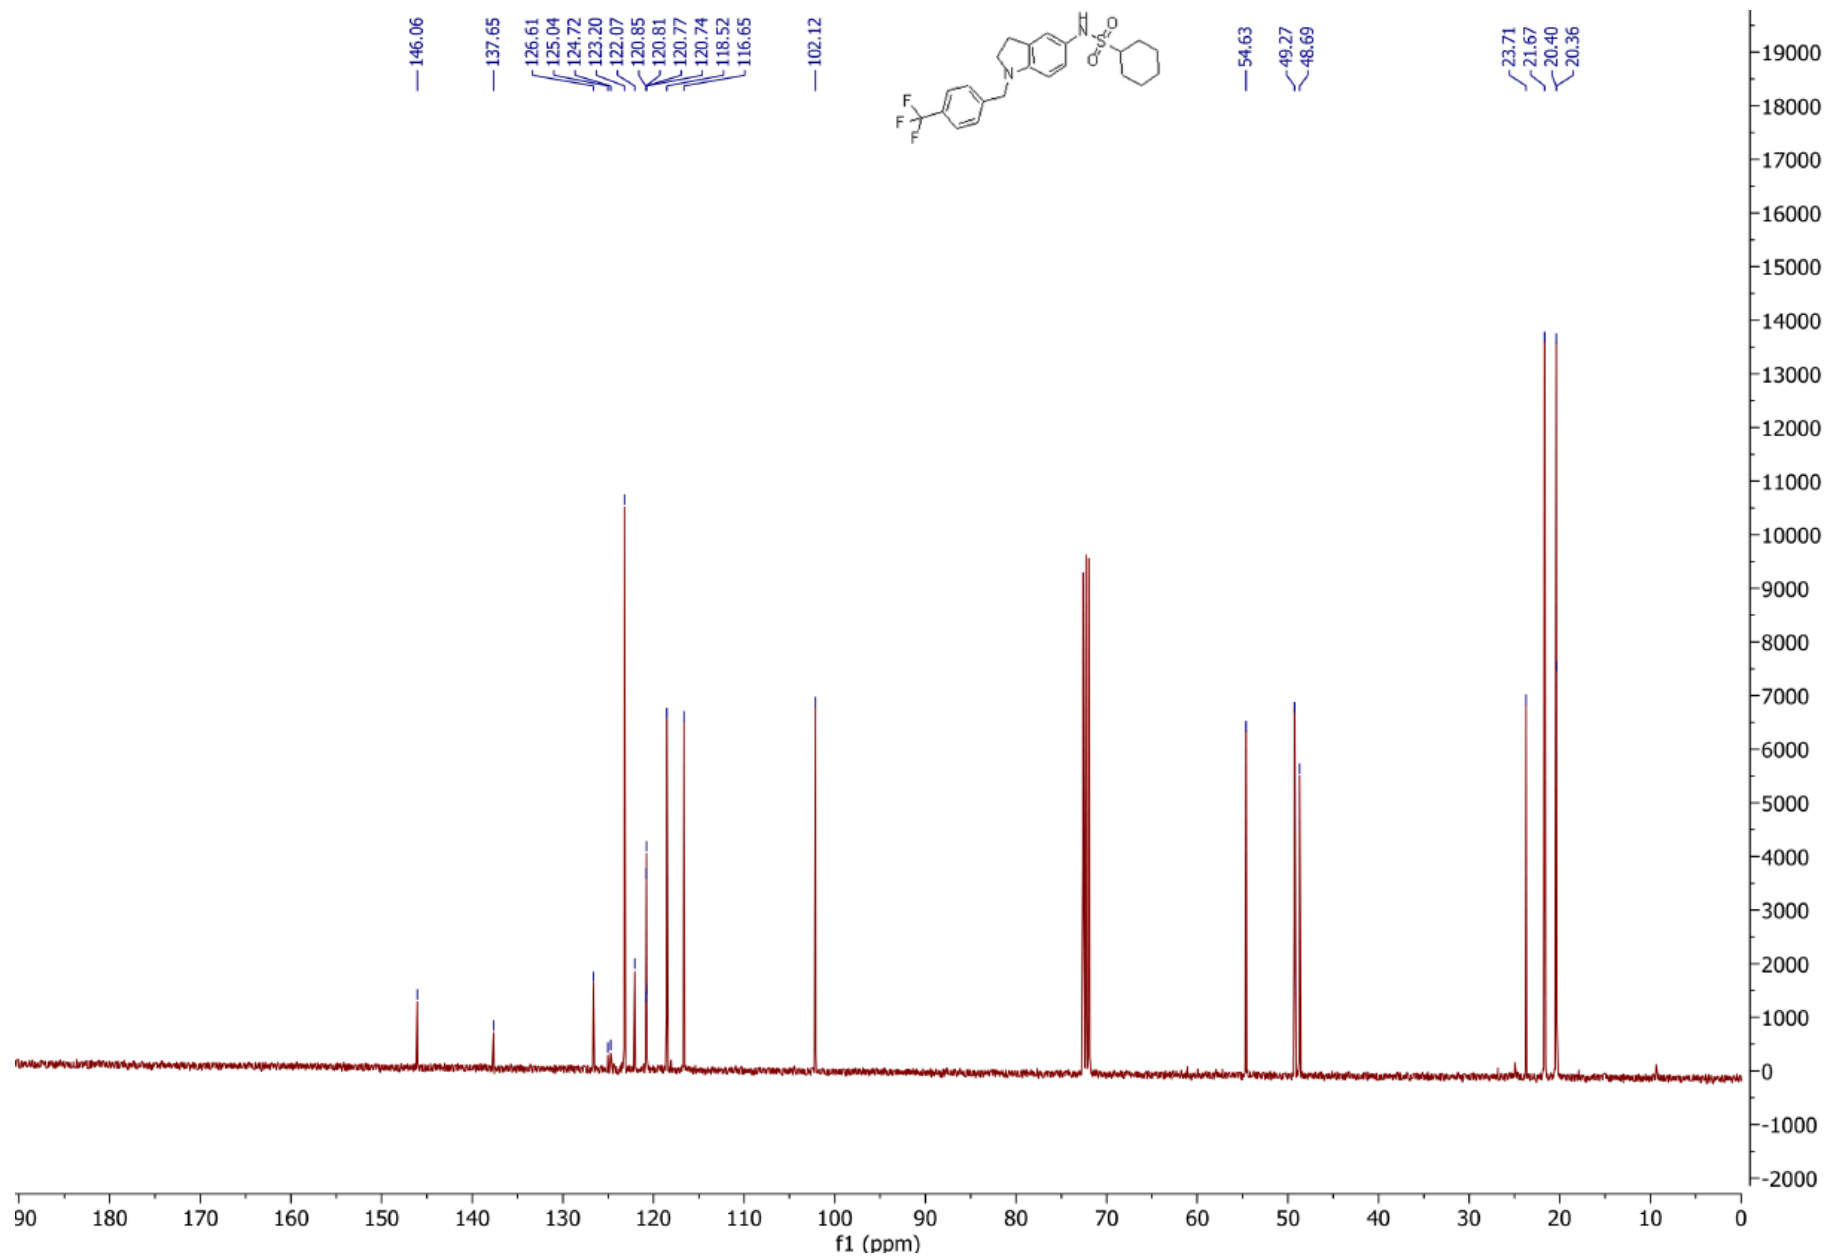

<sup>1</sup>H NMR of compound **13c**

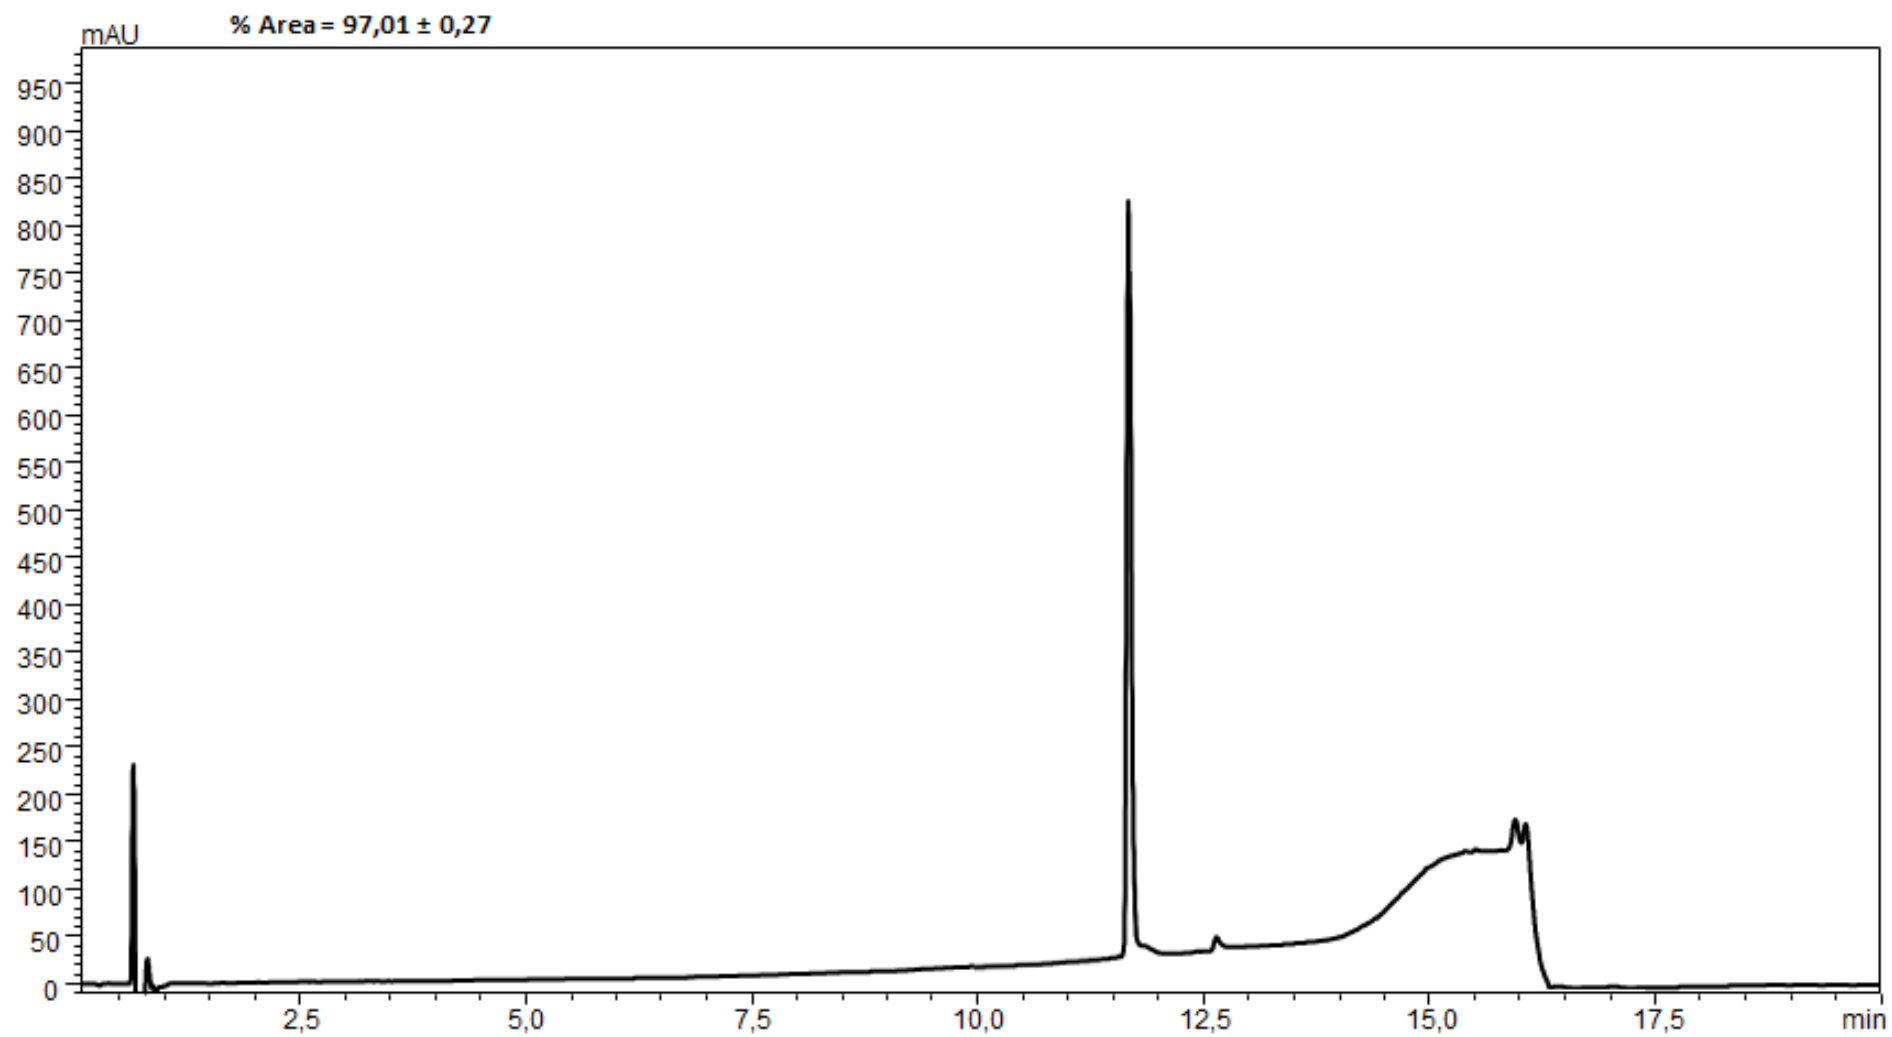

$^1\text{H}$  NMR of compound **13c**

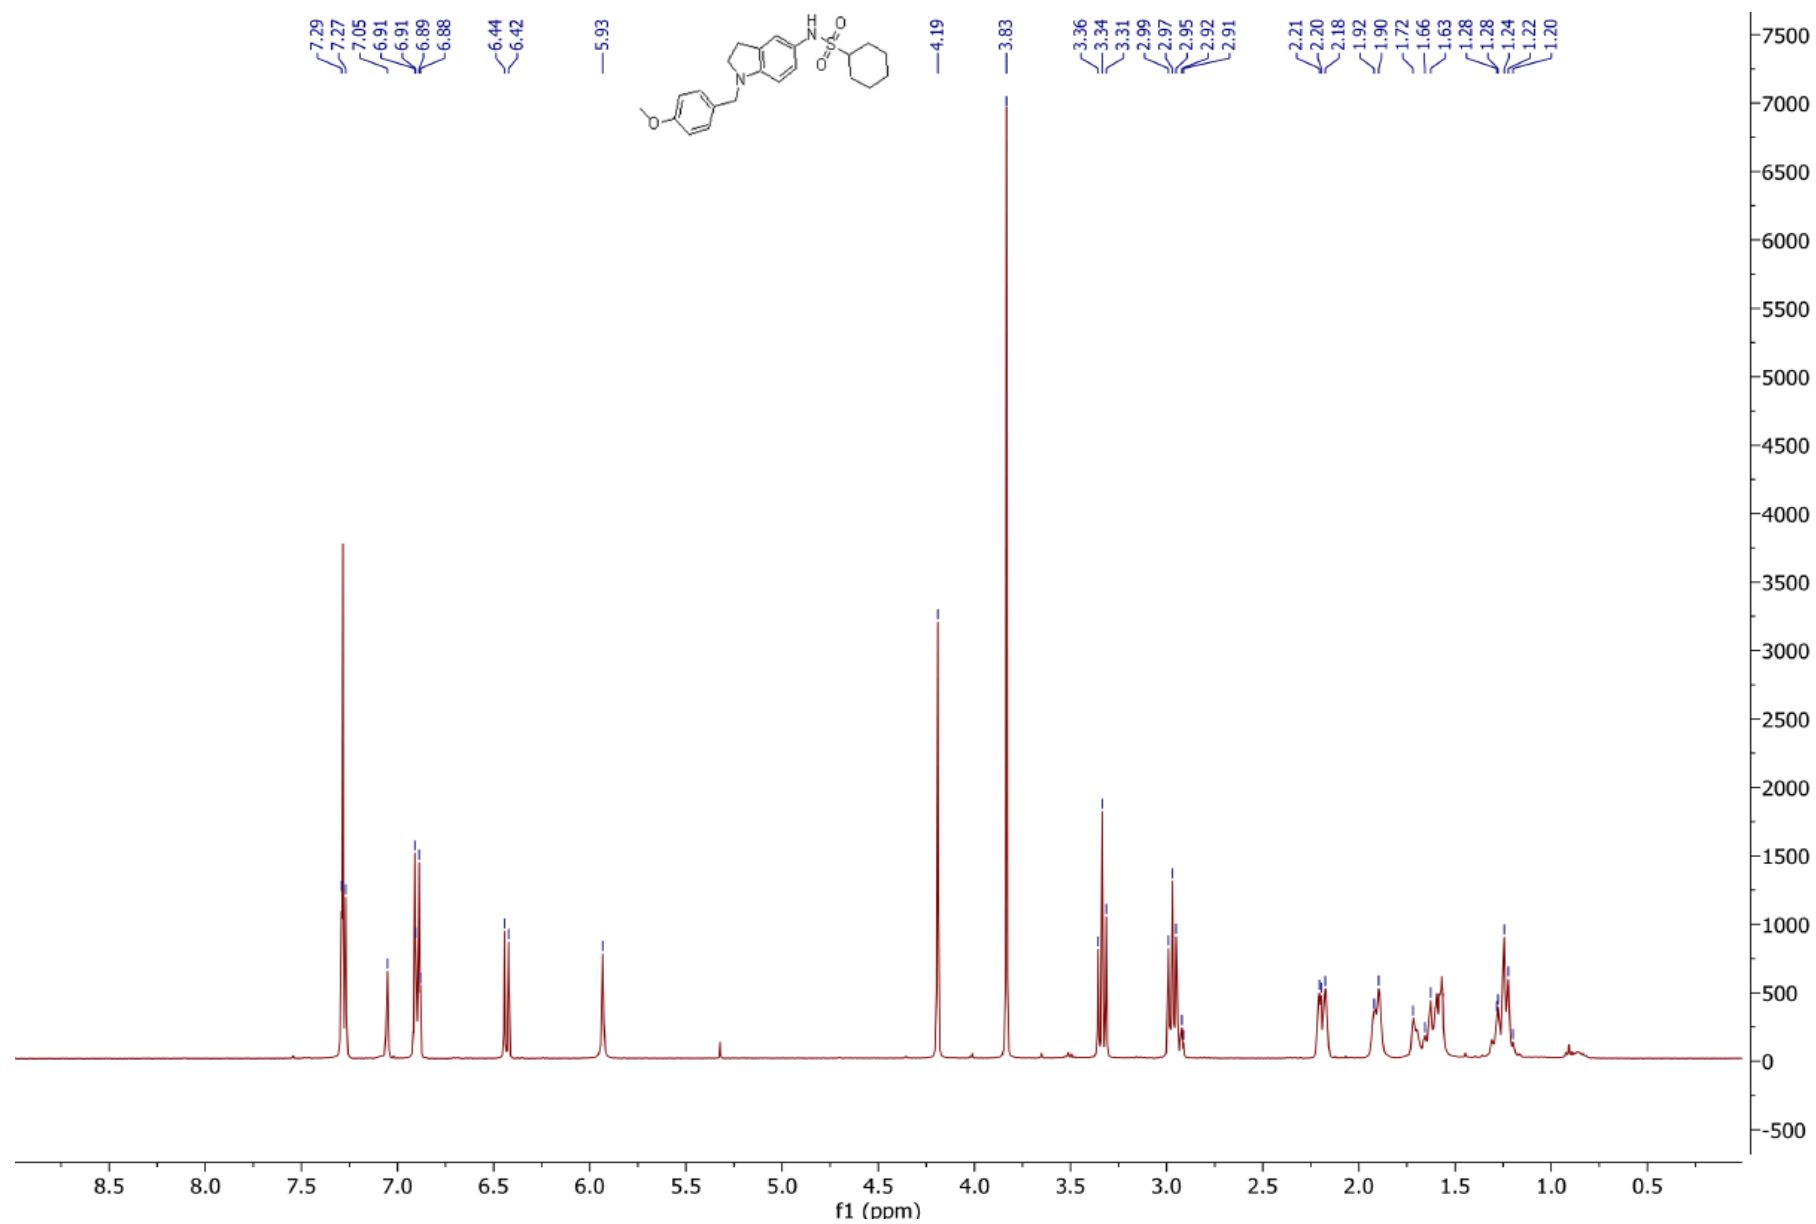

<sup>1</sup>H NMR of compound **13d**



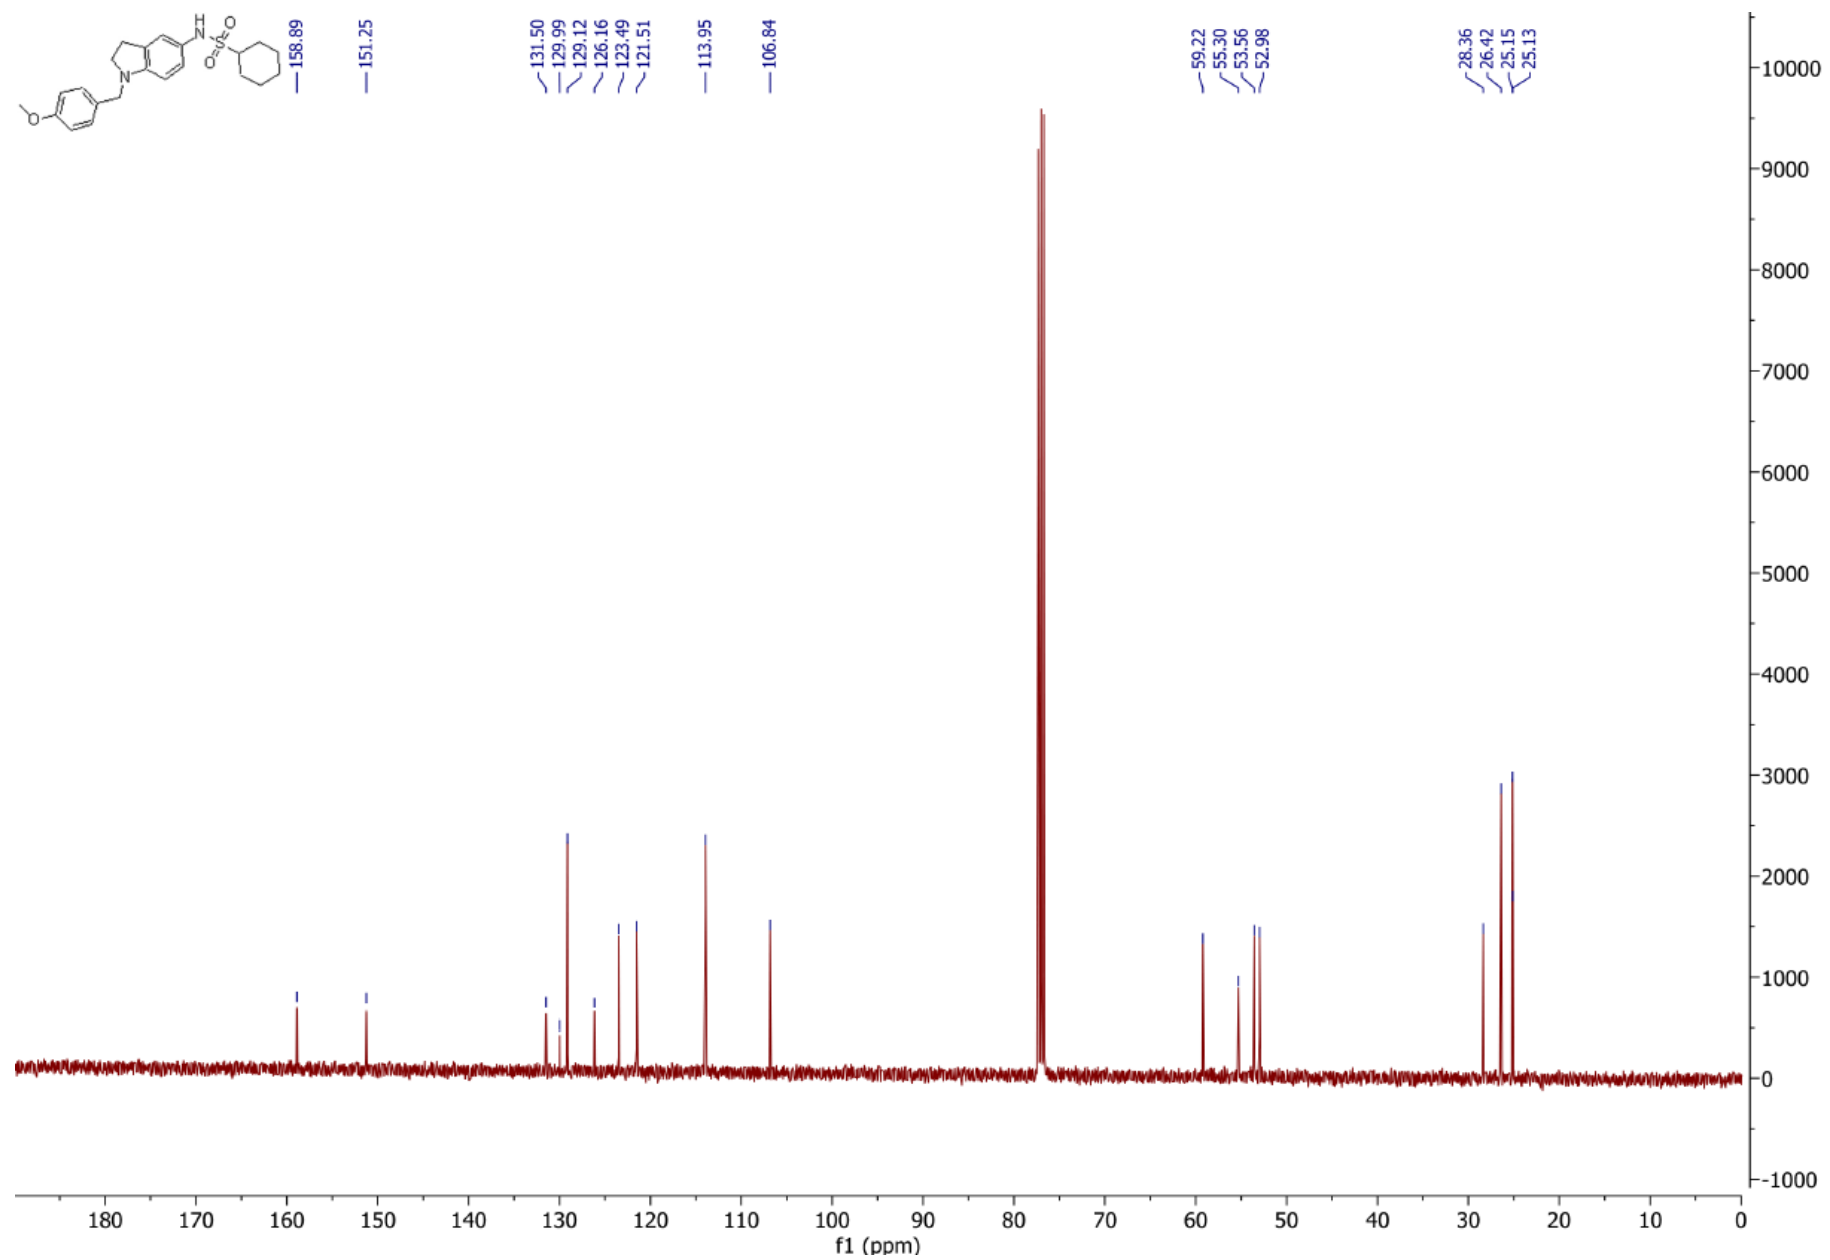

<sup>13</sup>C NMR of compound **13d**

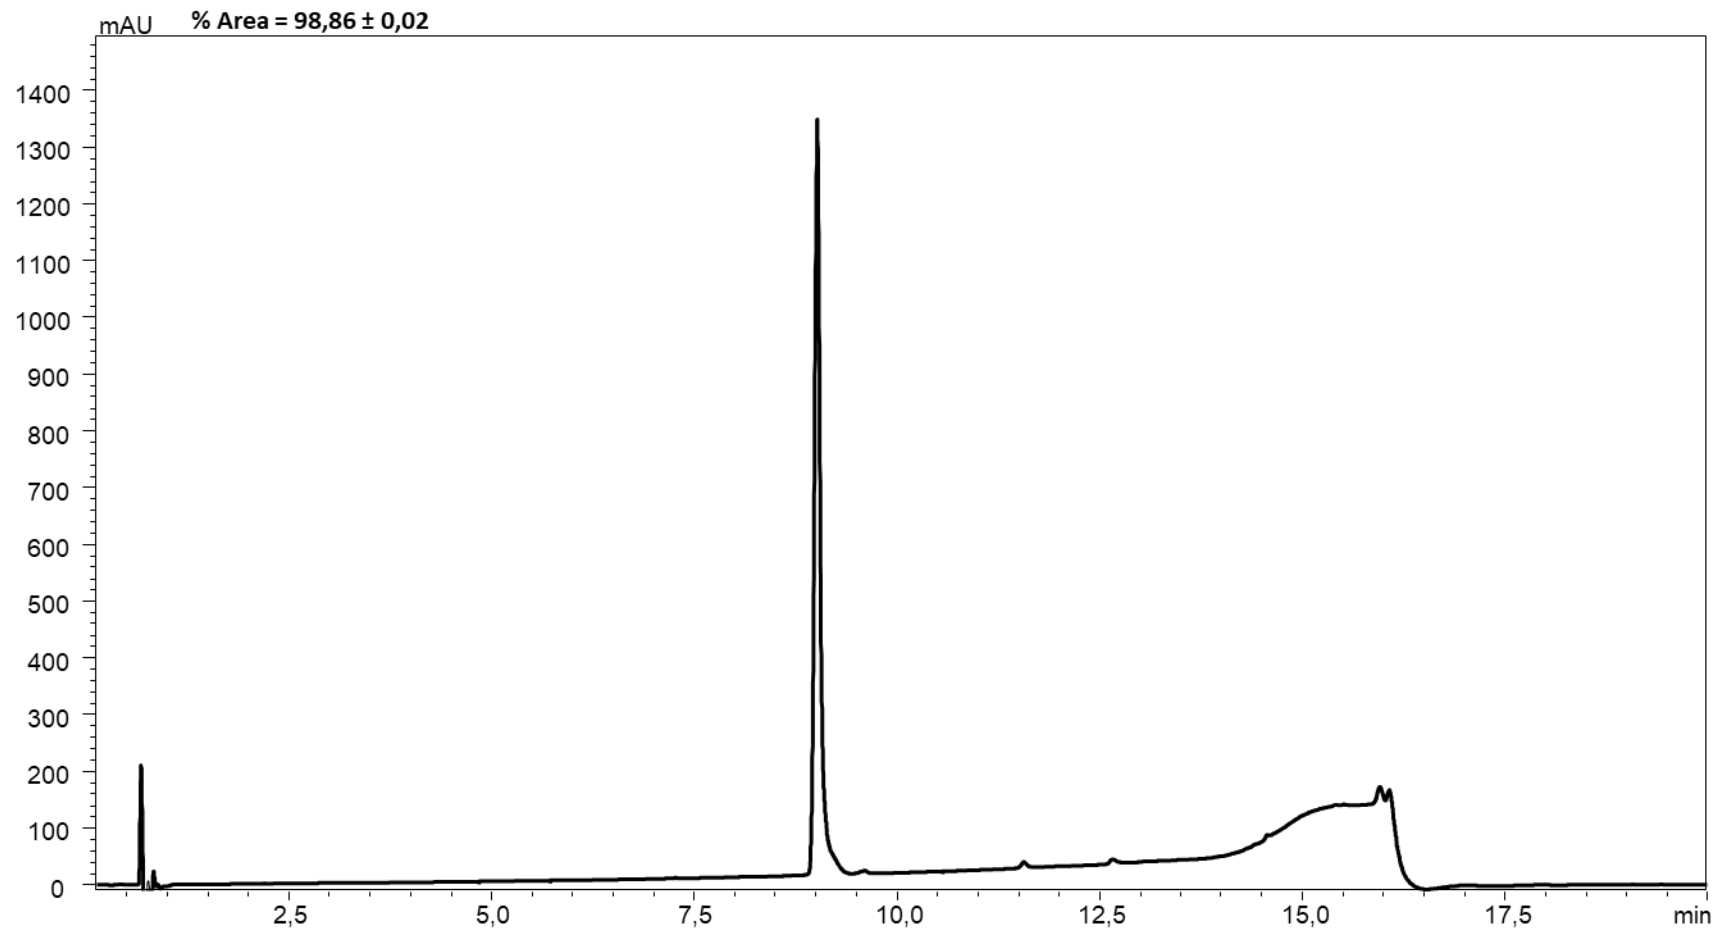

RP-HPLC trace of compound **13d**

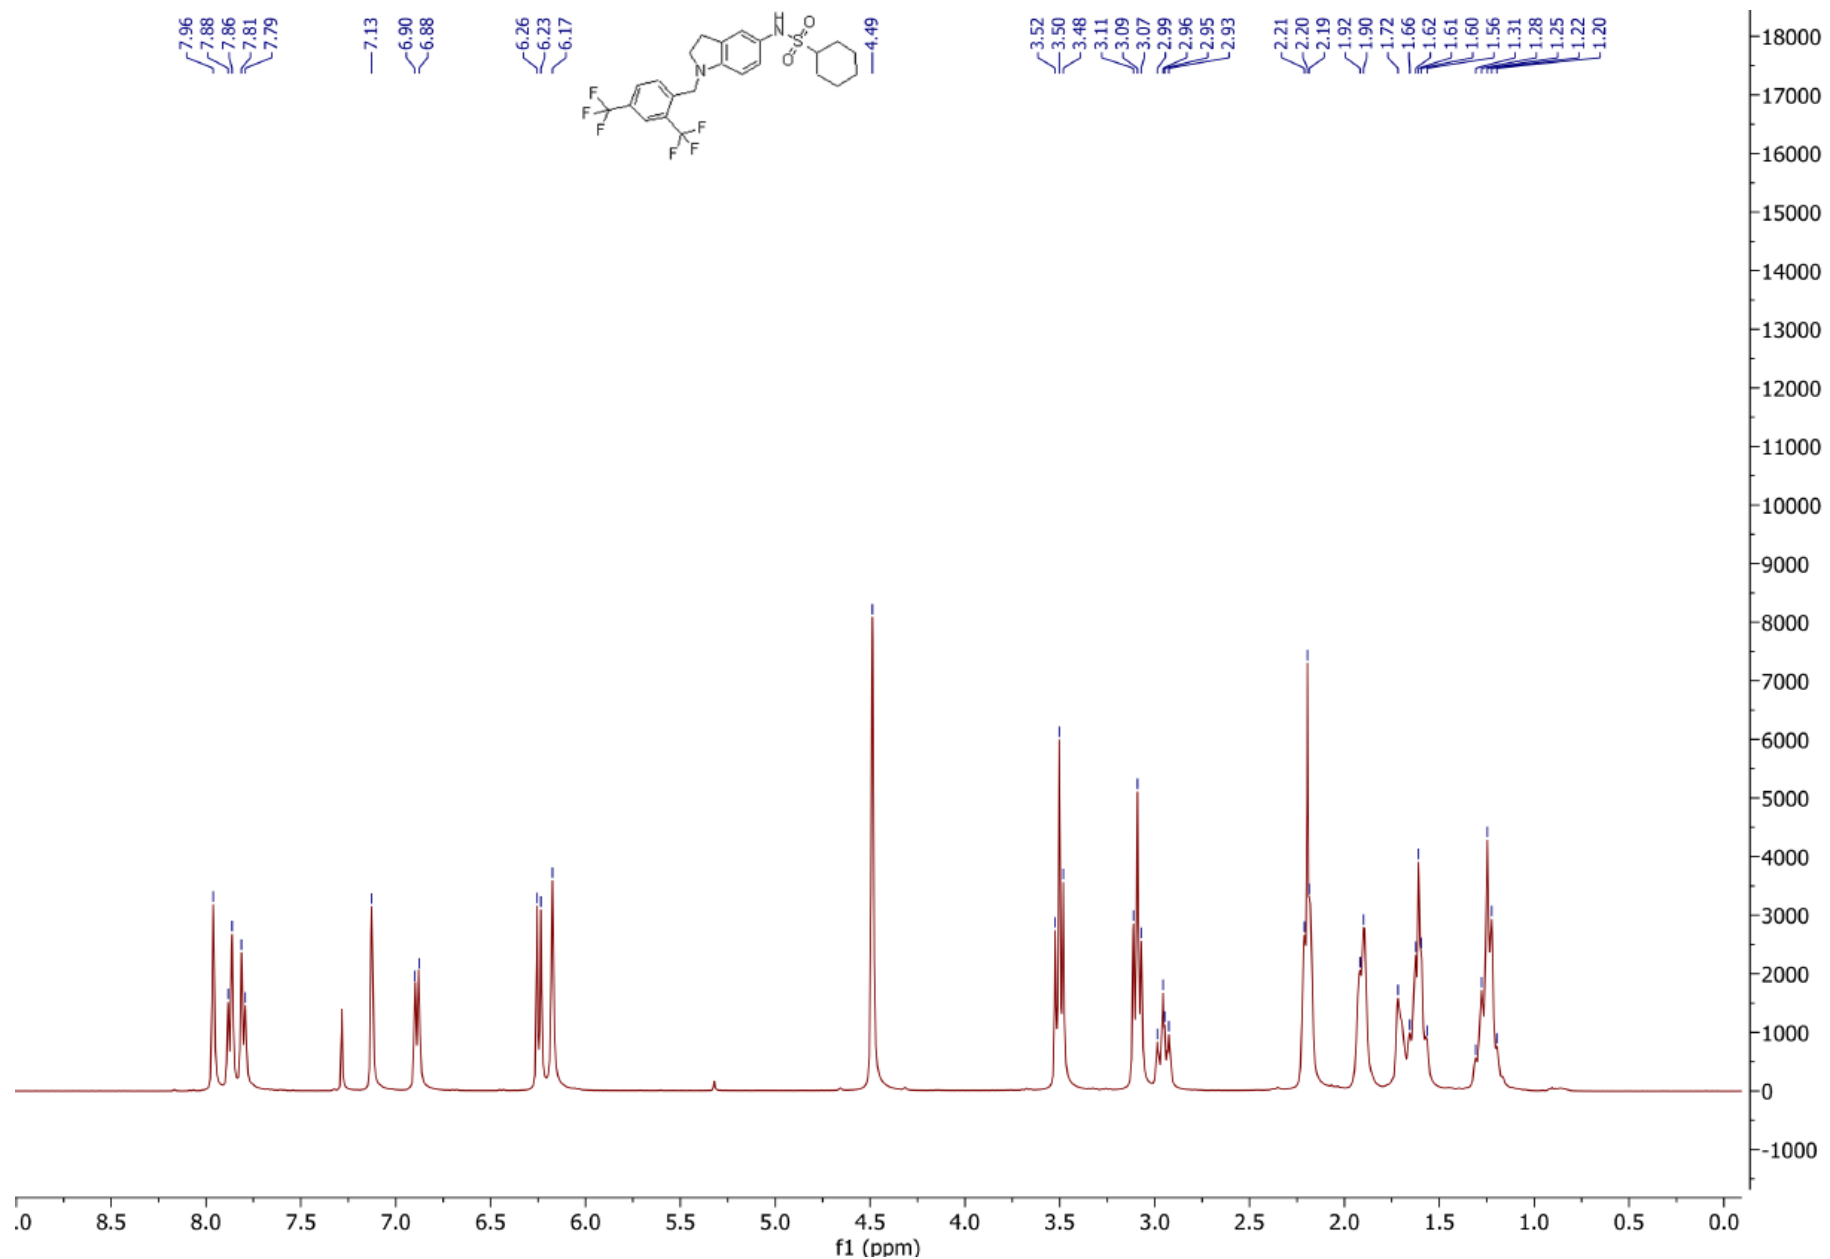

**1H NMR of compound 13e**

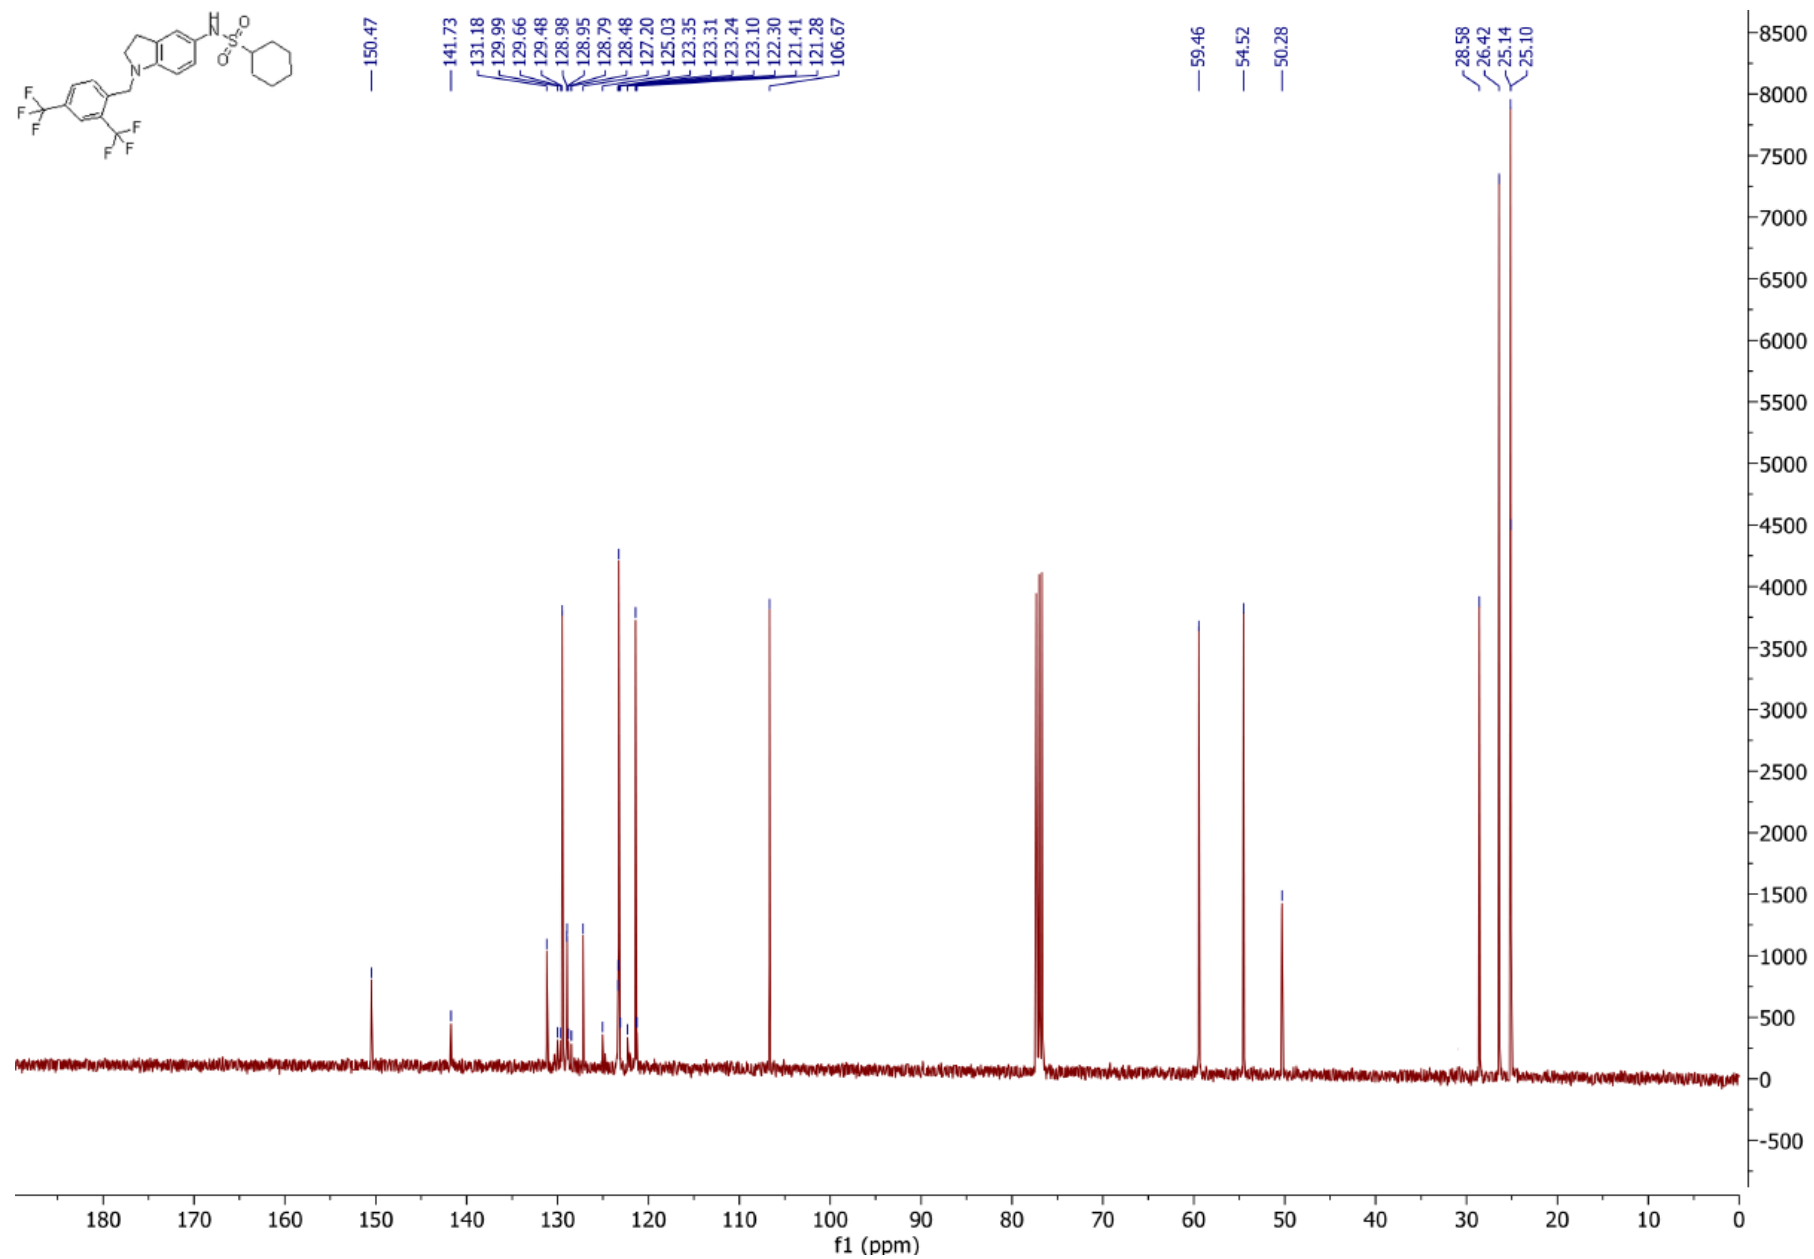

<sup>13</sup>C NMR of compound **13e**

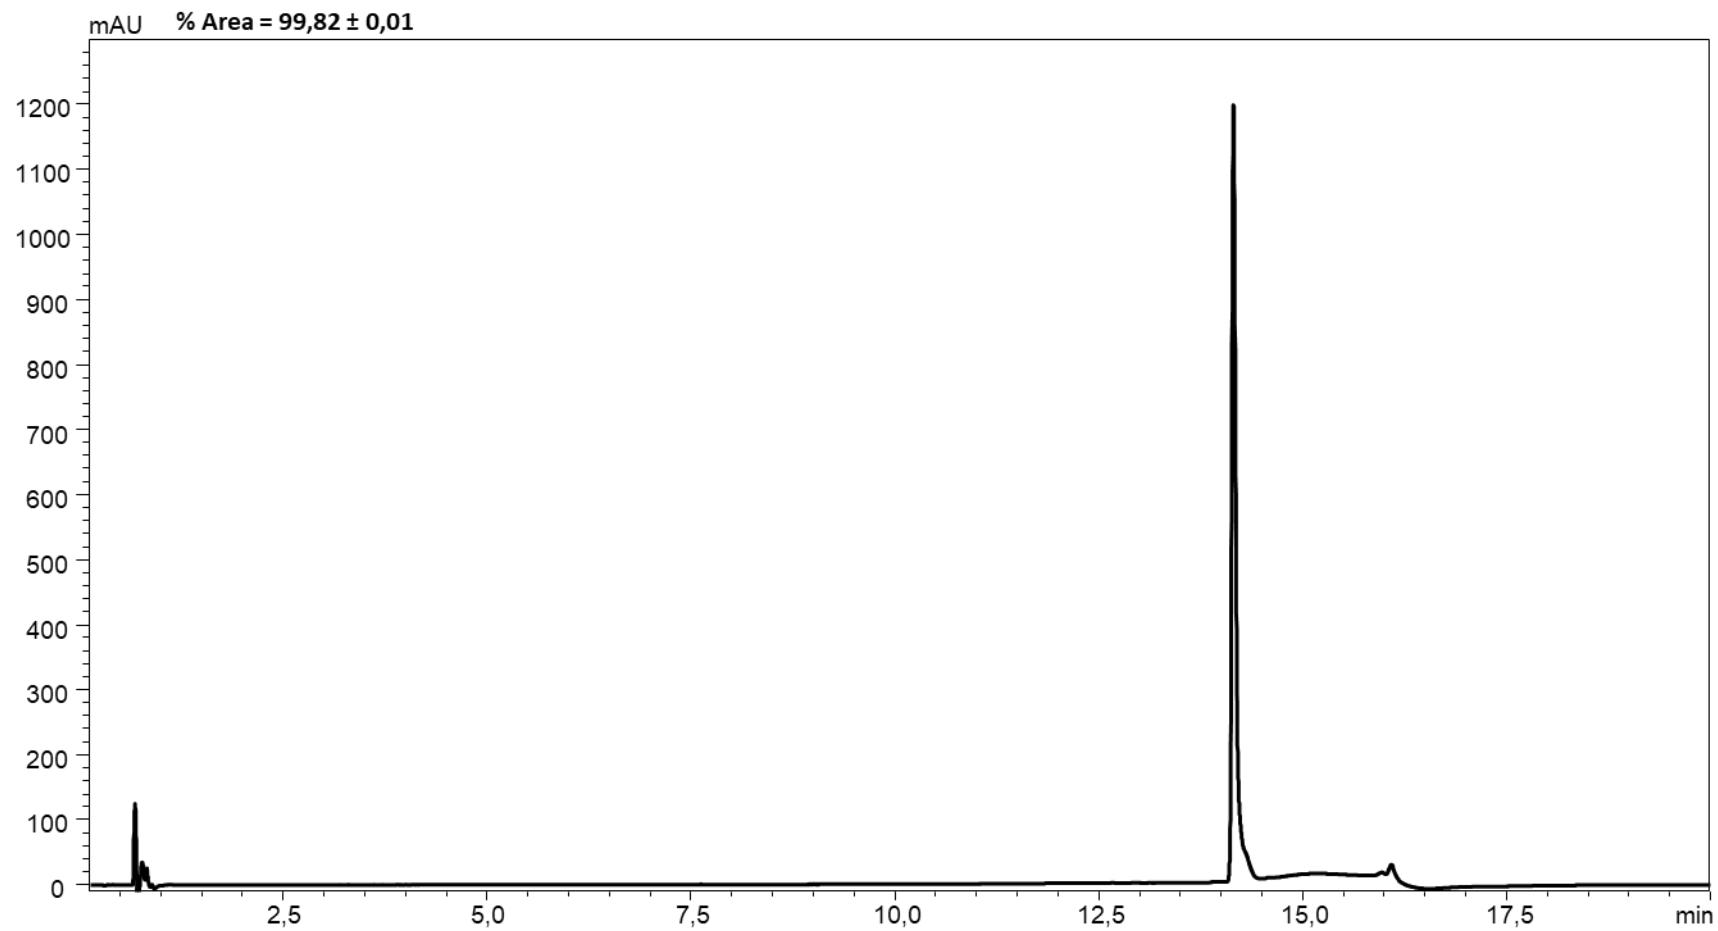

RP-HPLC of compound **13e**

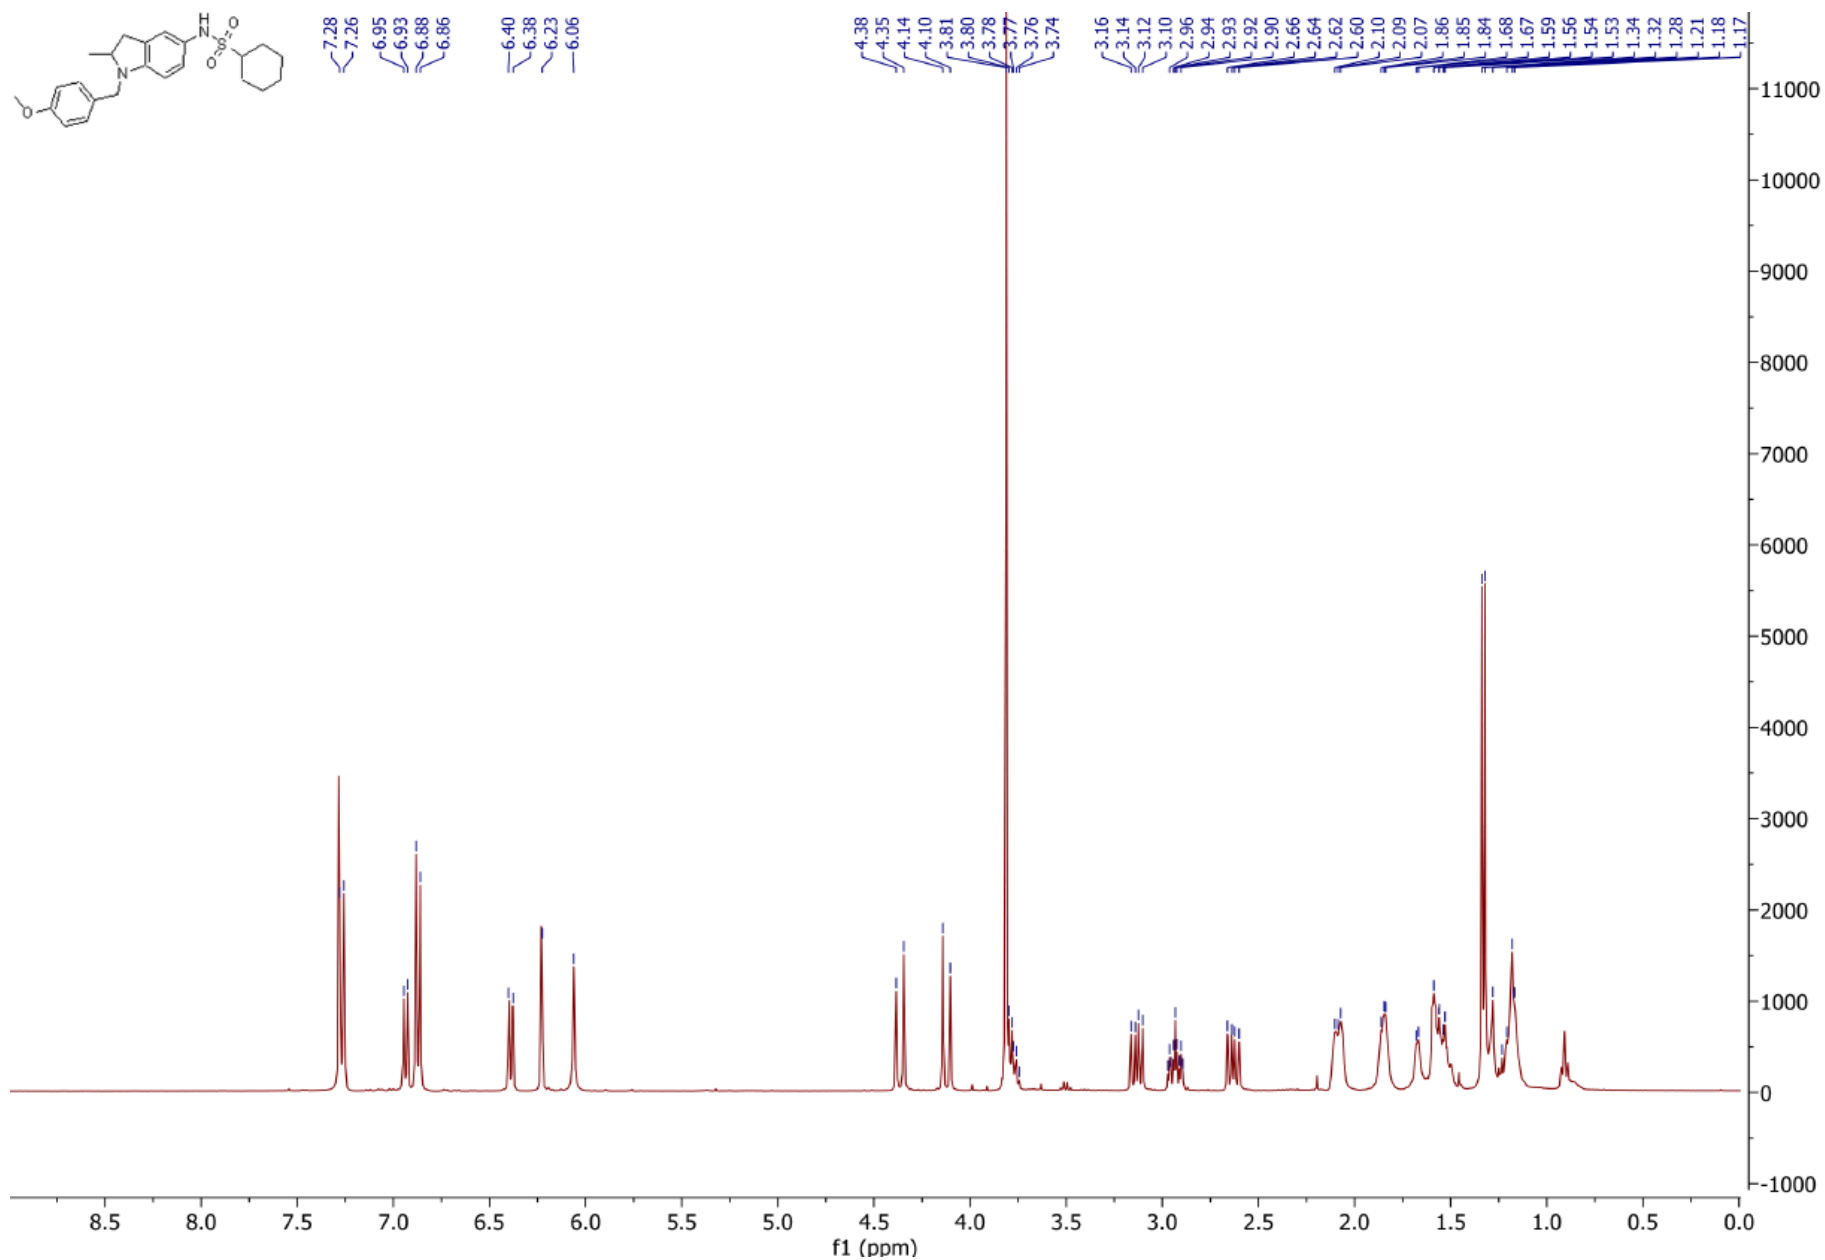

<sup>1</sup>H NMR of compound **13f**

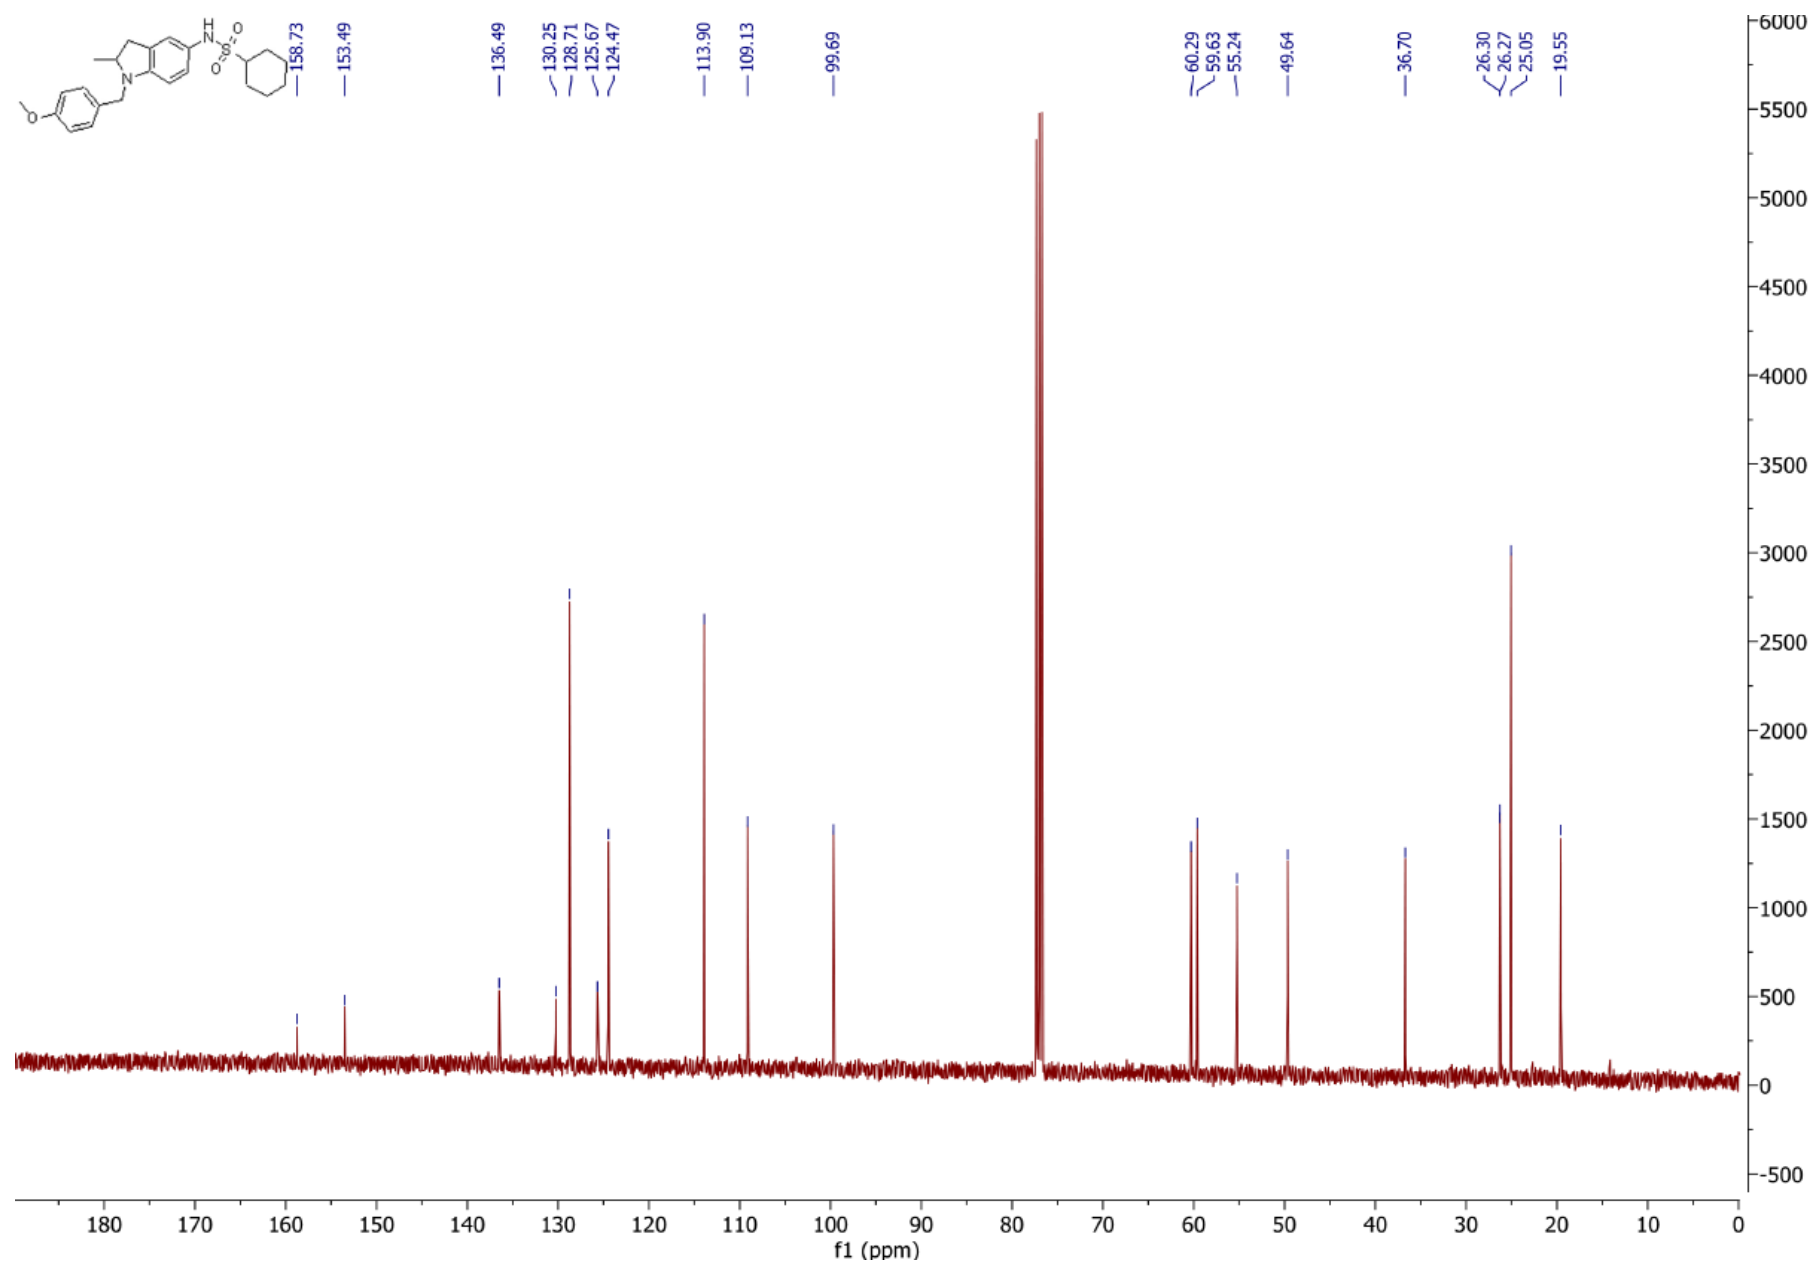

<sup>13</sup>C NMR of compound **13f**

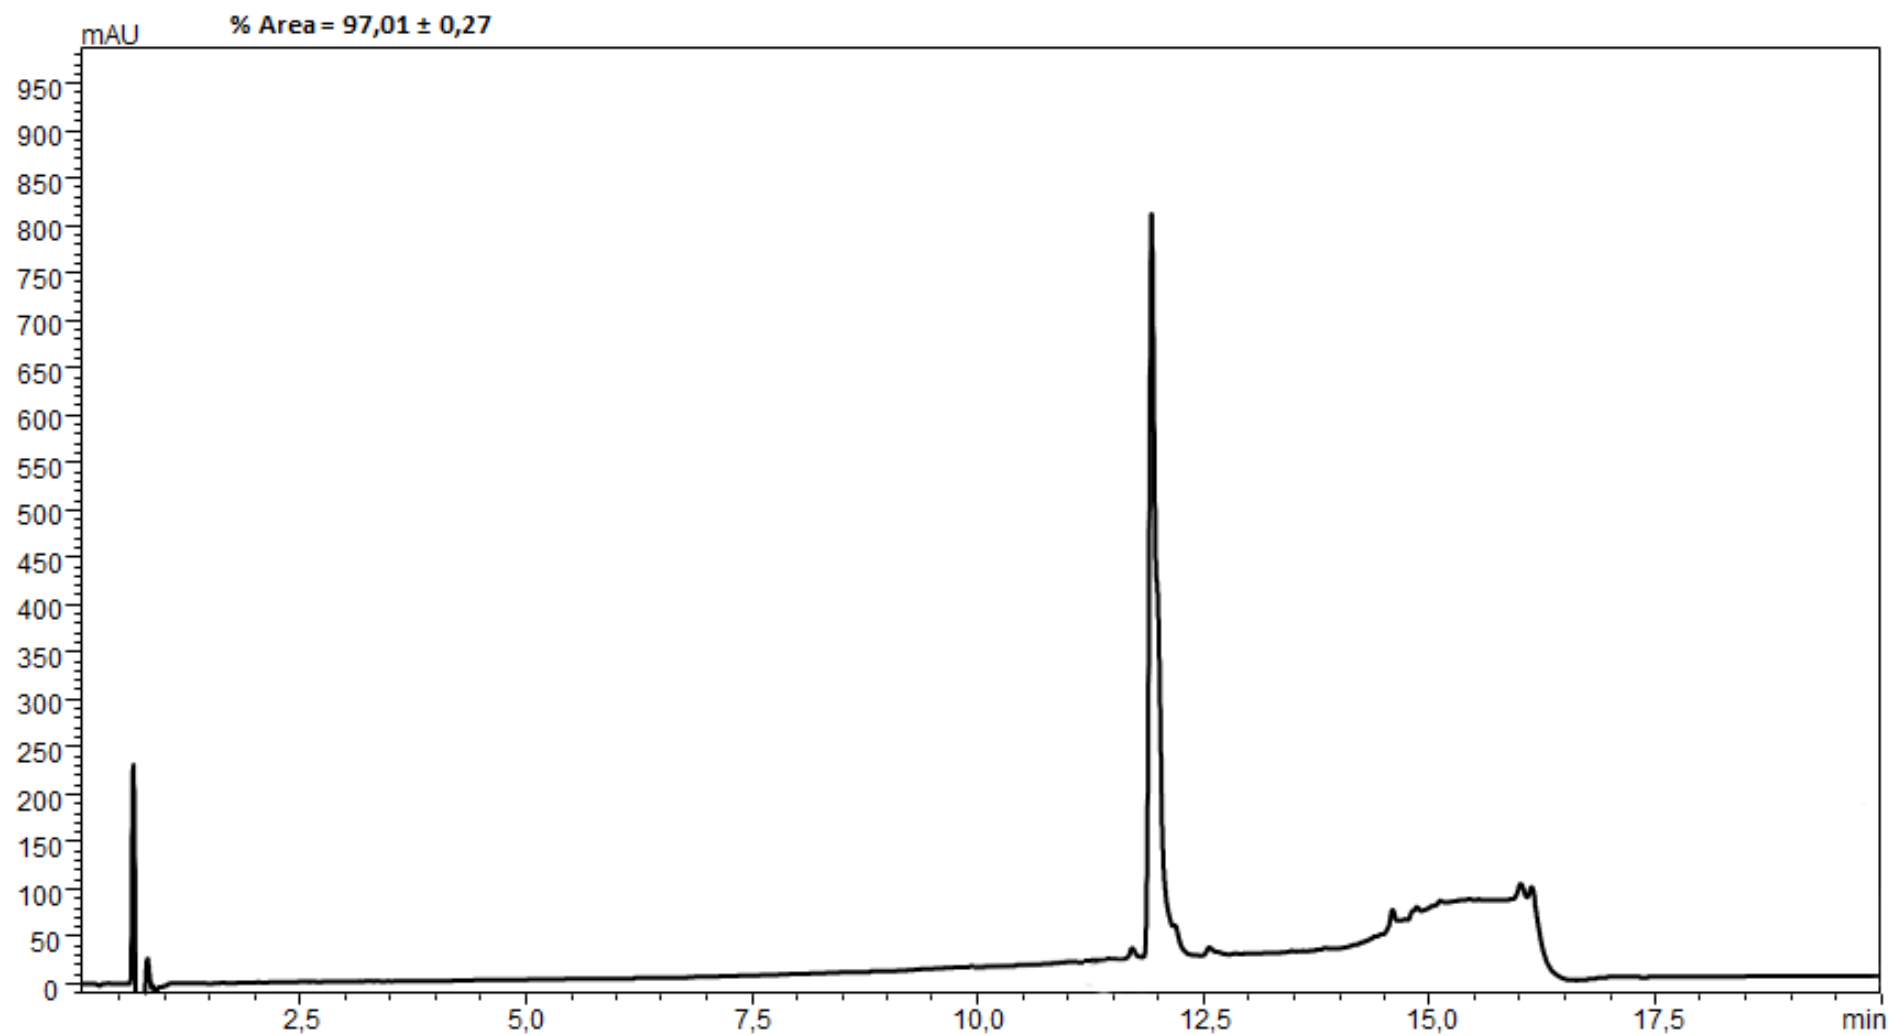

RP-HPLC of compound **13f**



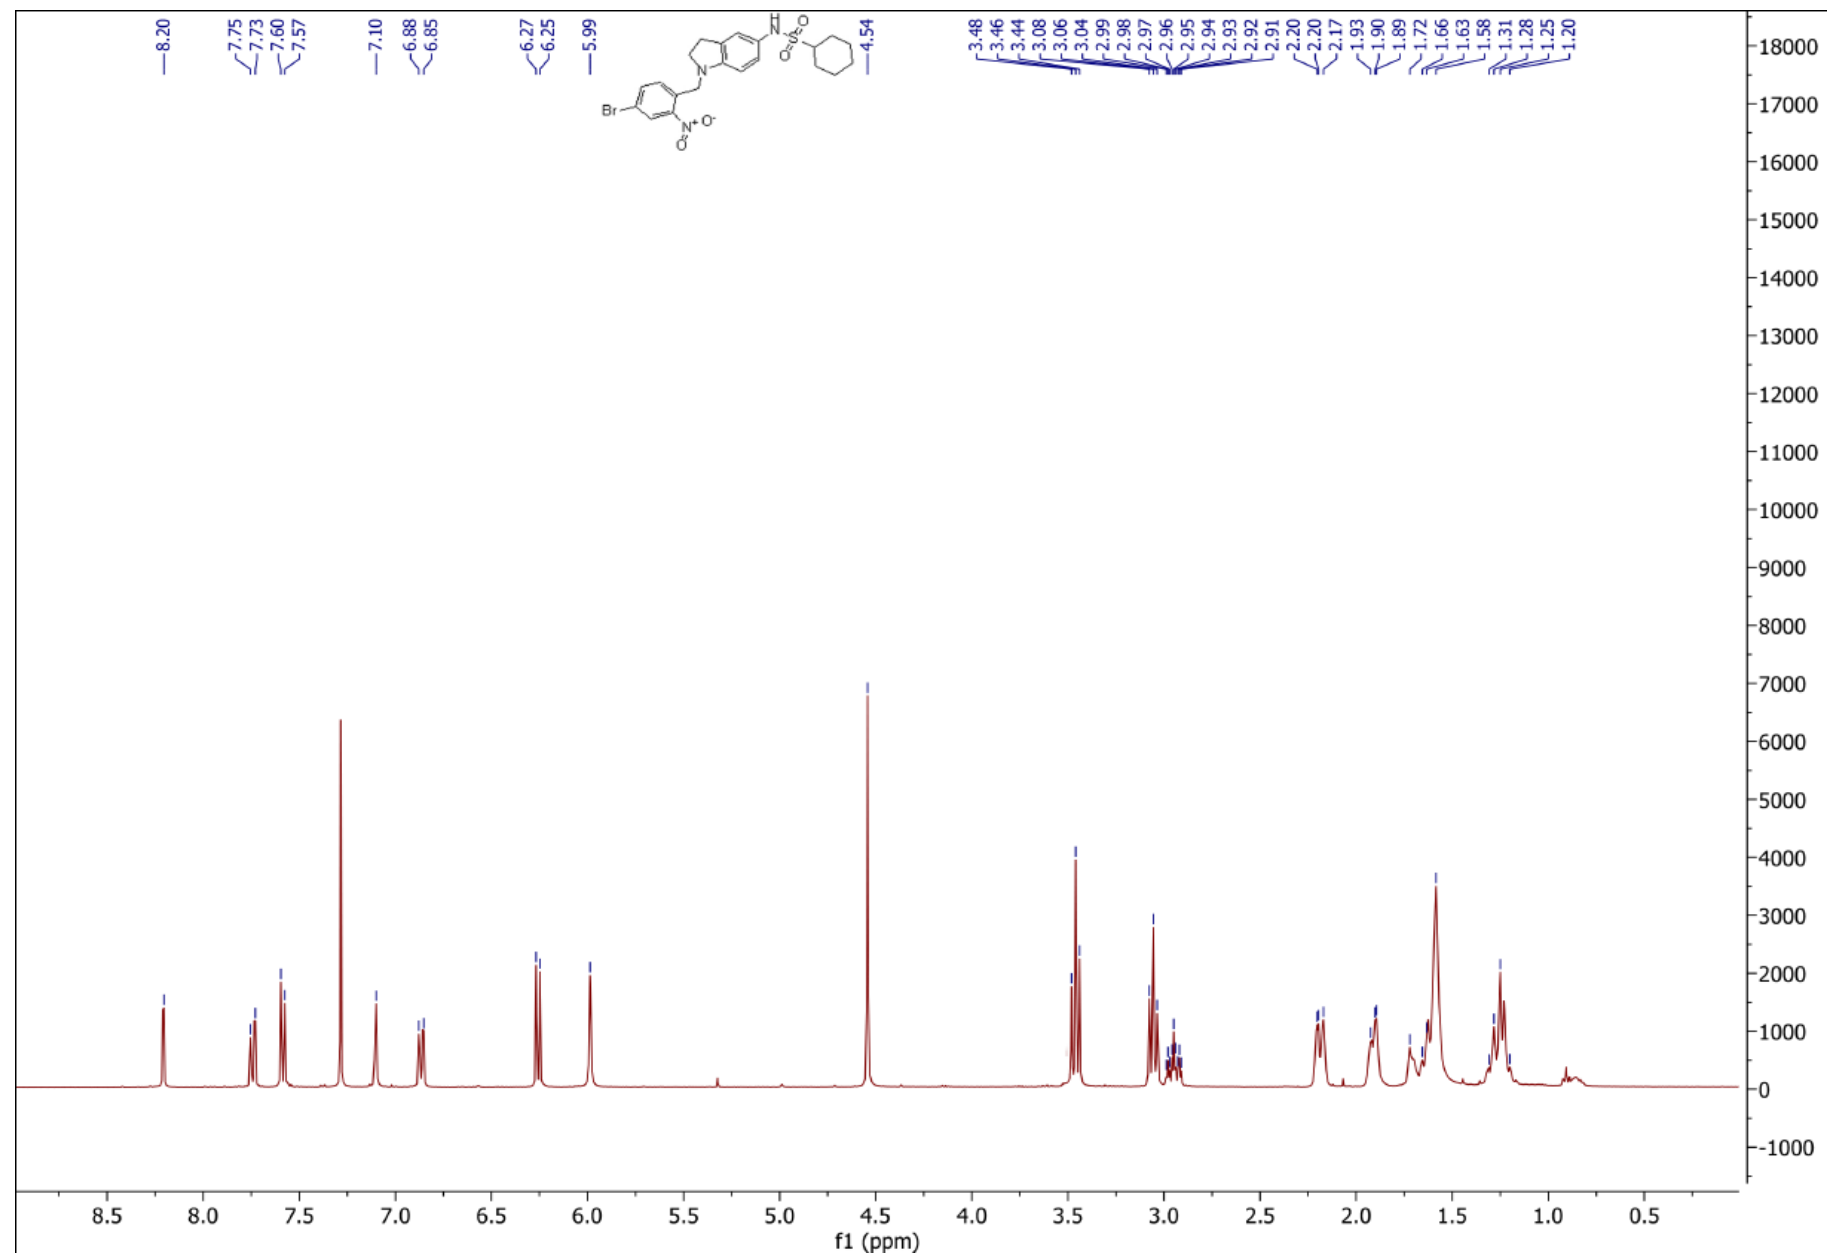

**<sup>1</sup>H NMR of compound 13g**

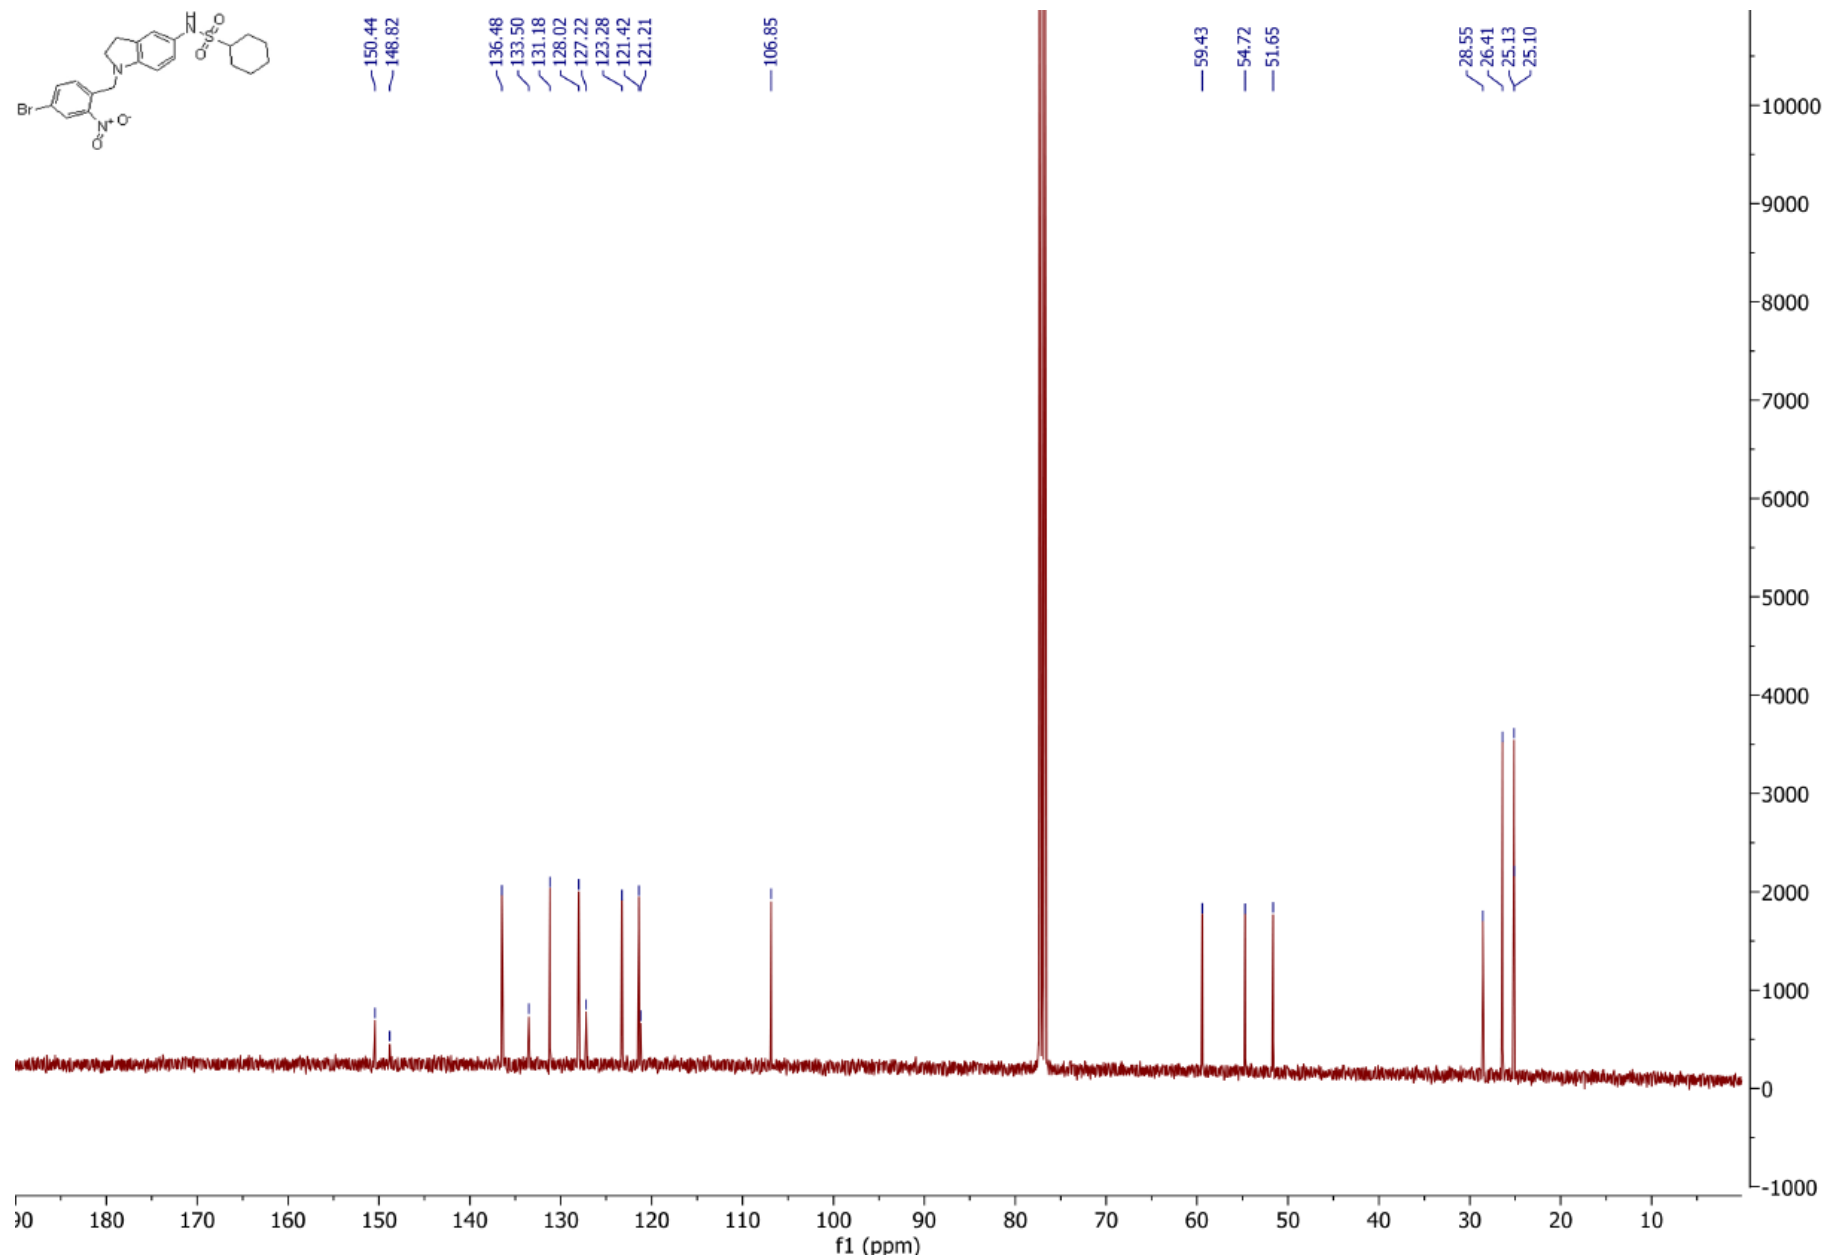

<sup>13</sup>C NMR of compound **13g**

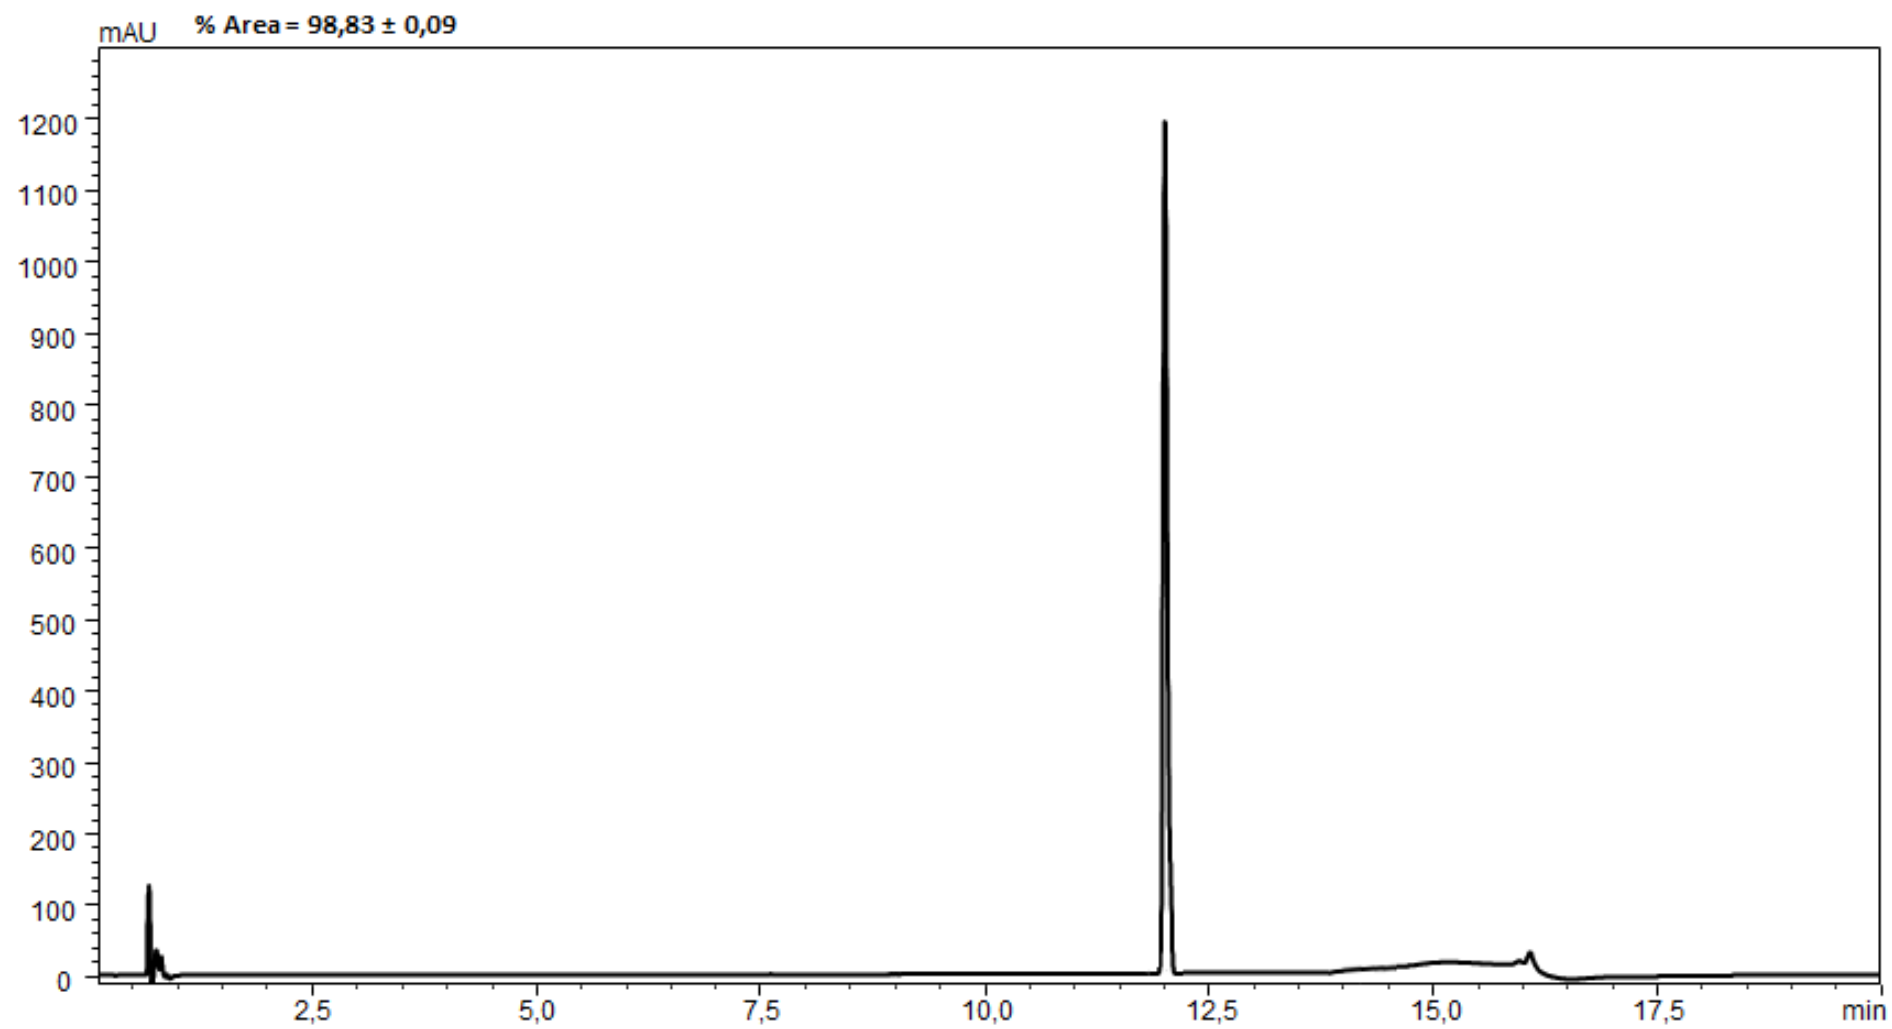

RP-HPLC trace of compound **13g**

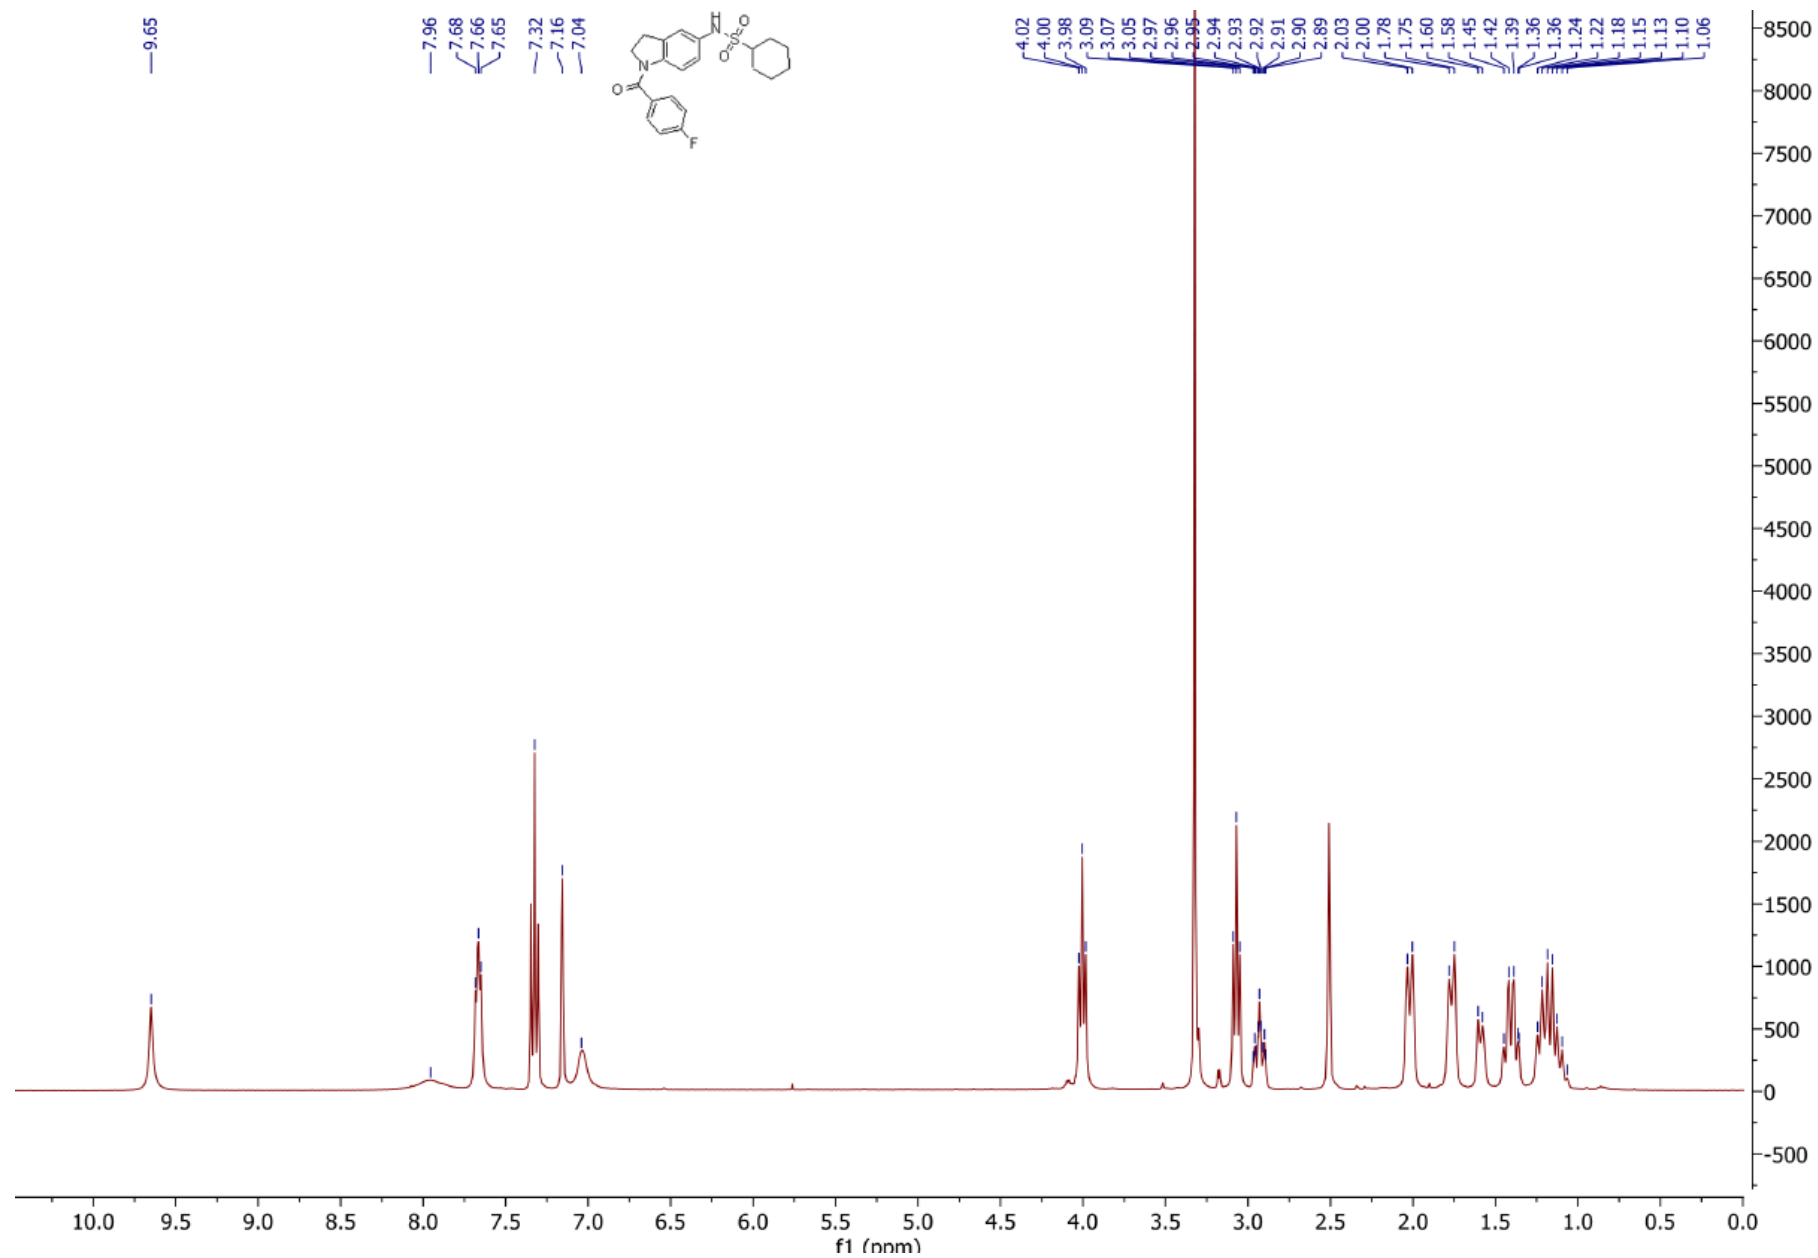

<sup>1</sup>H NMR of compound **16a**

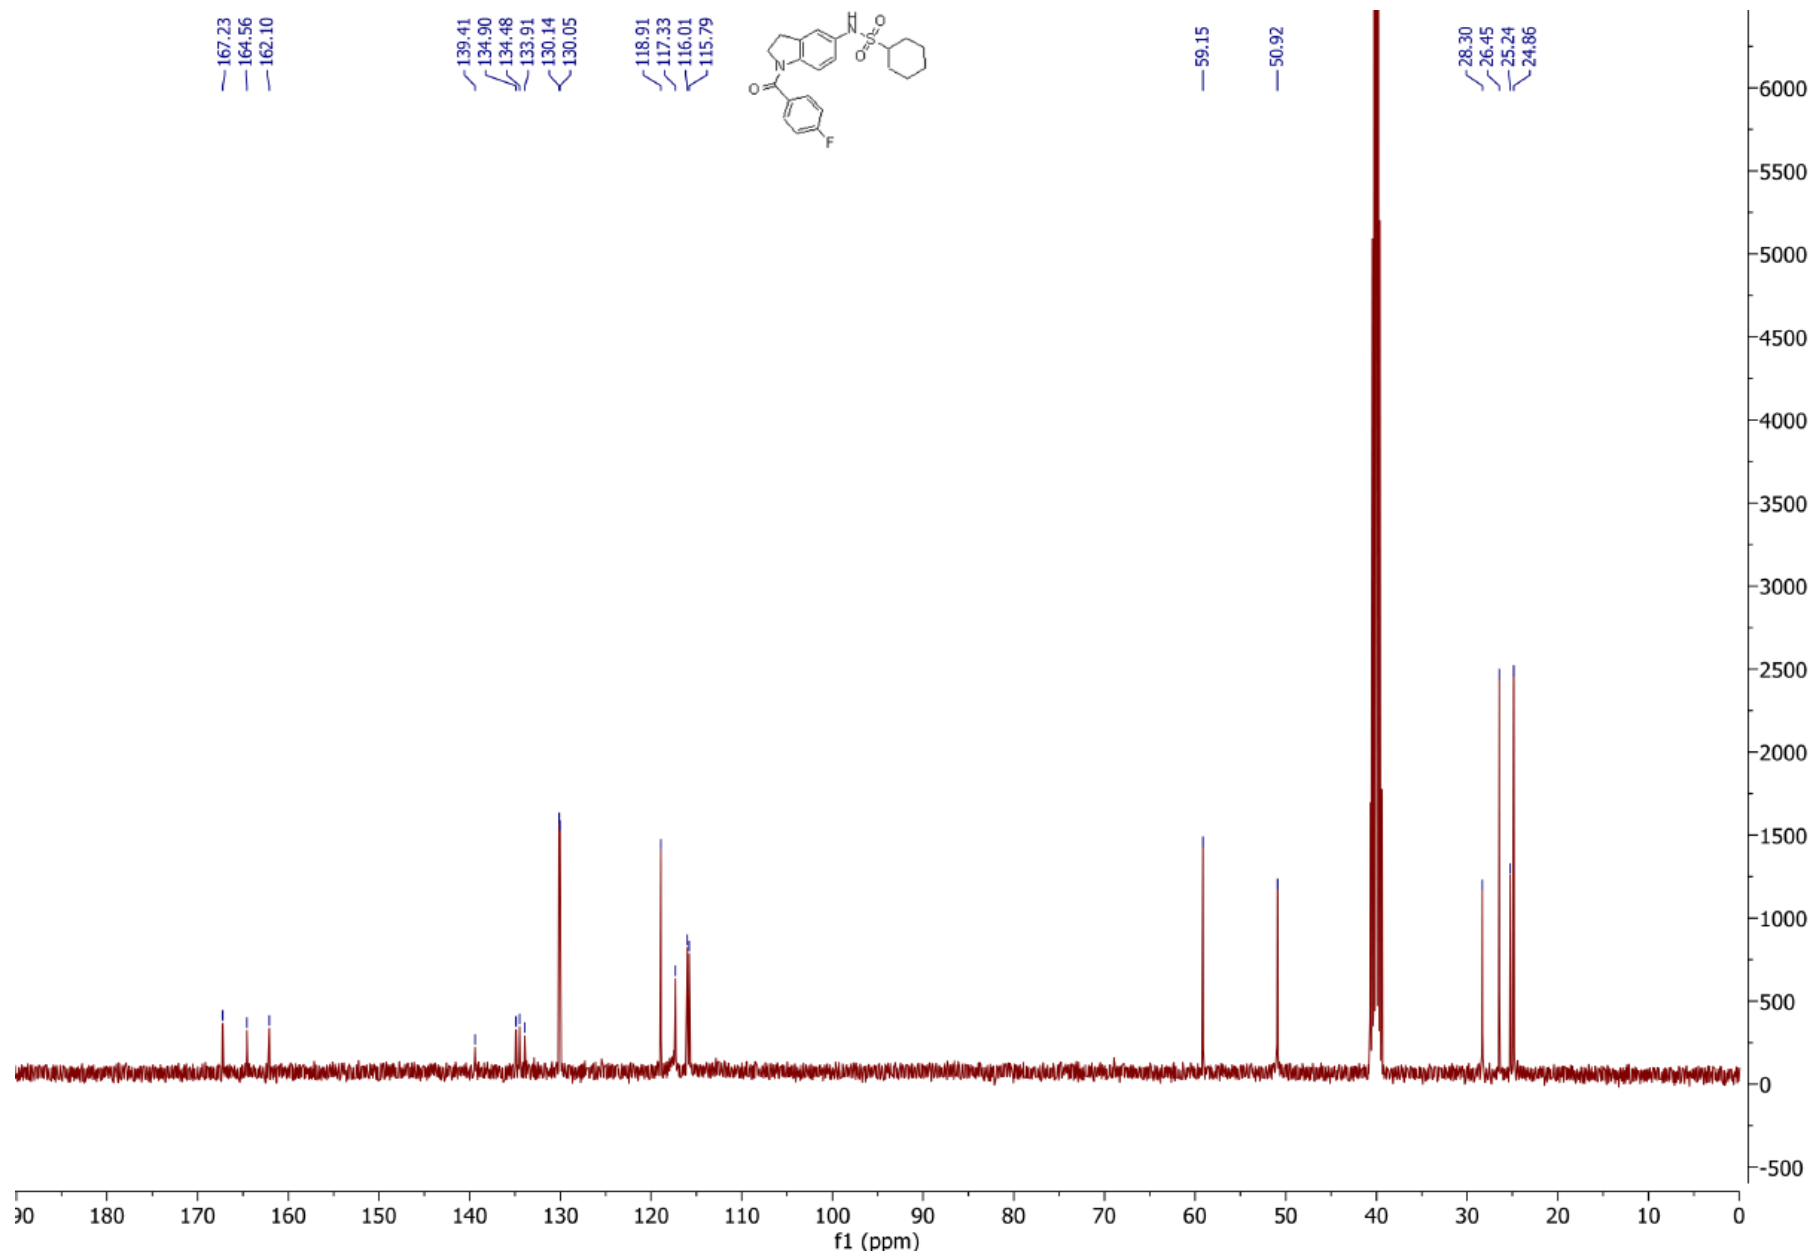

<sup>13</sup>C NMR of compound **16a**

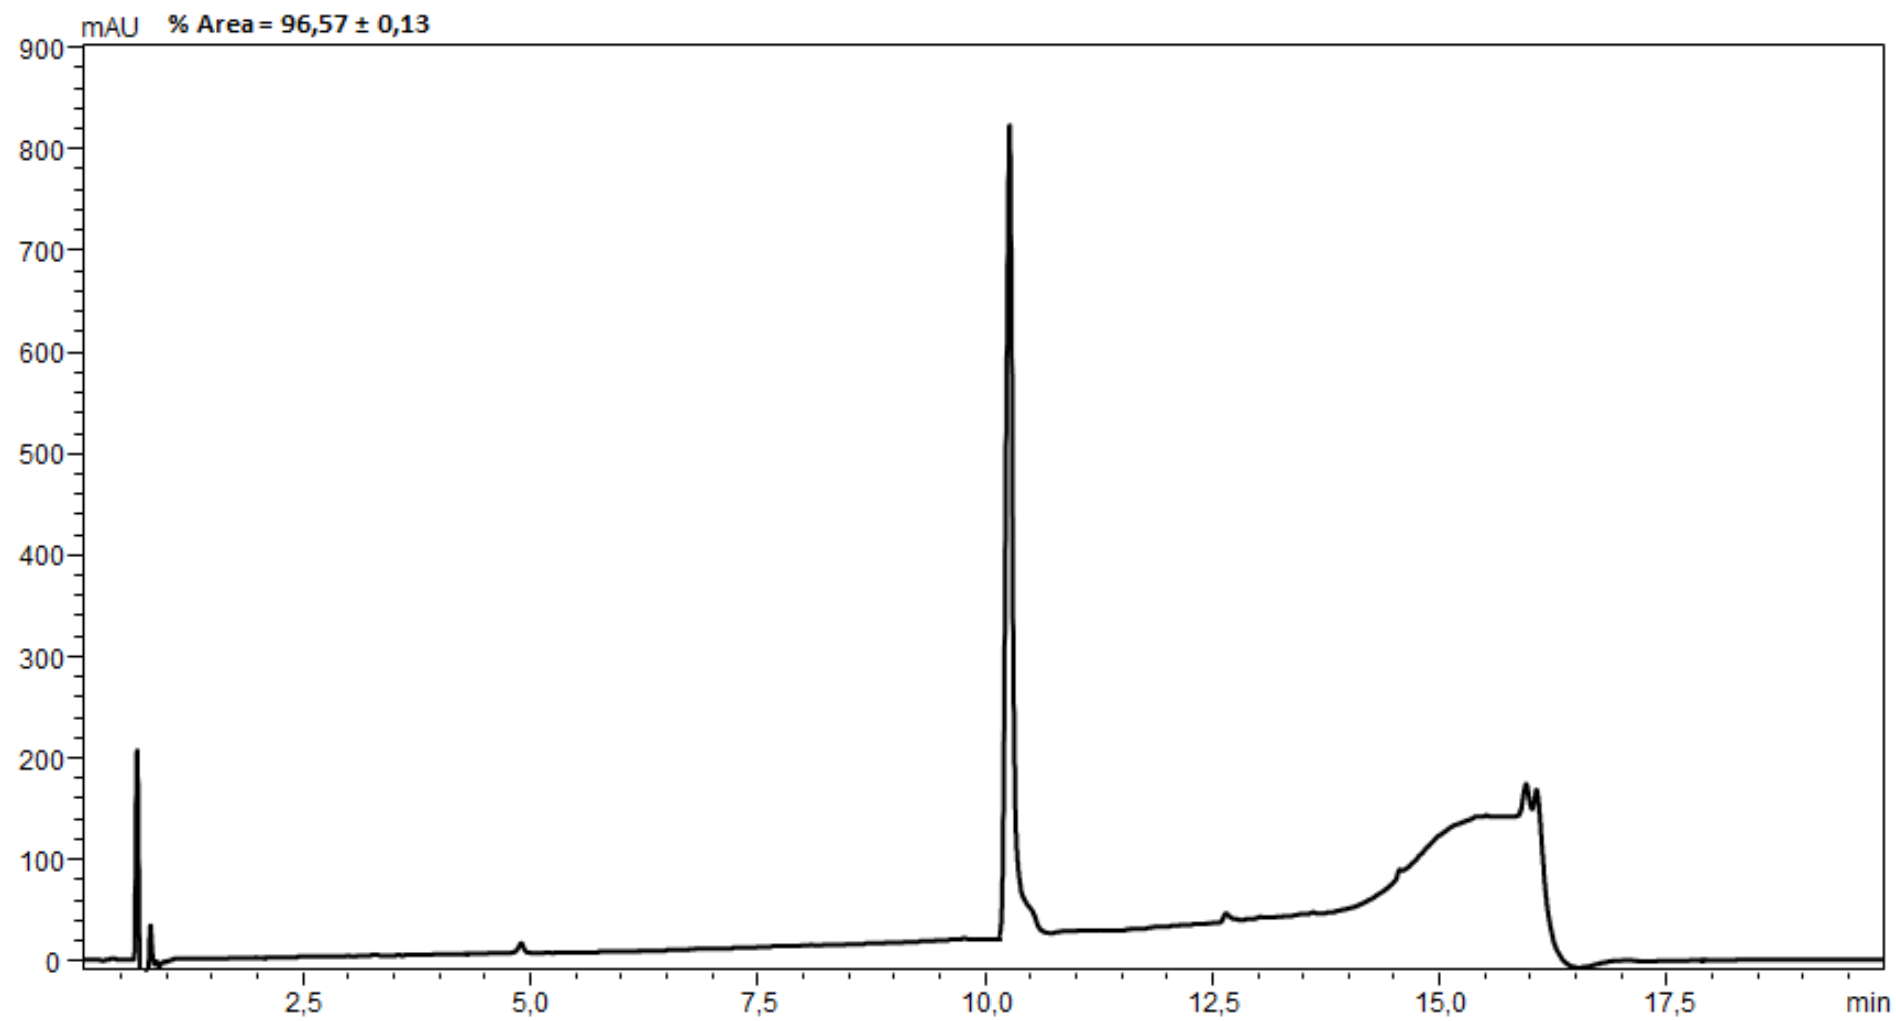

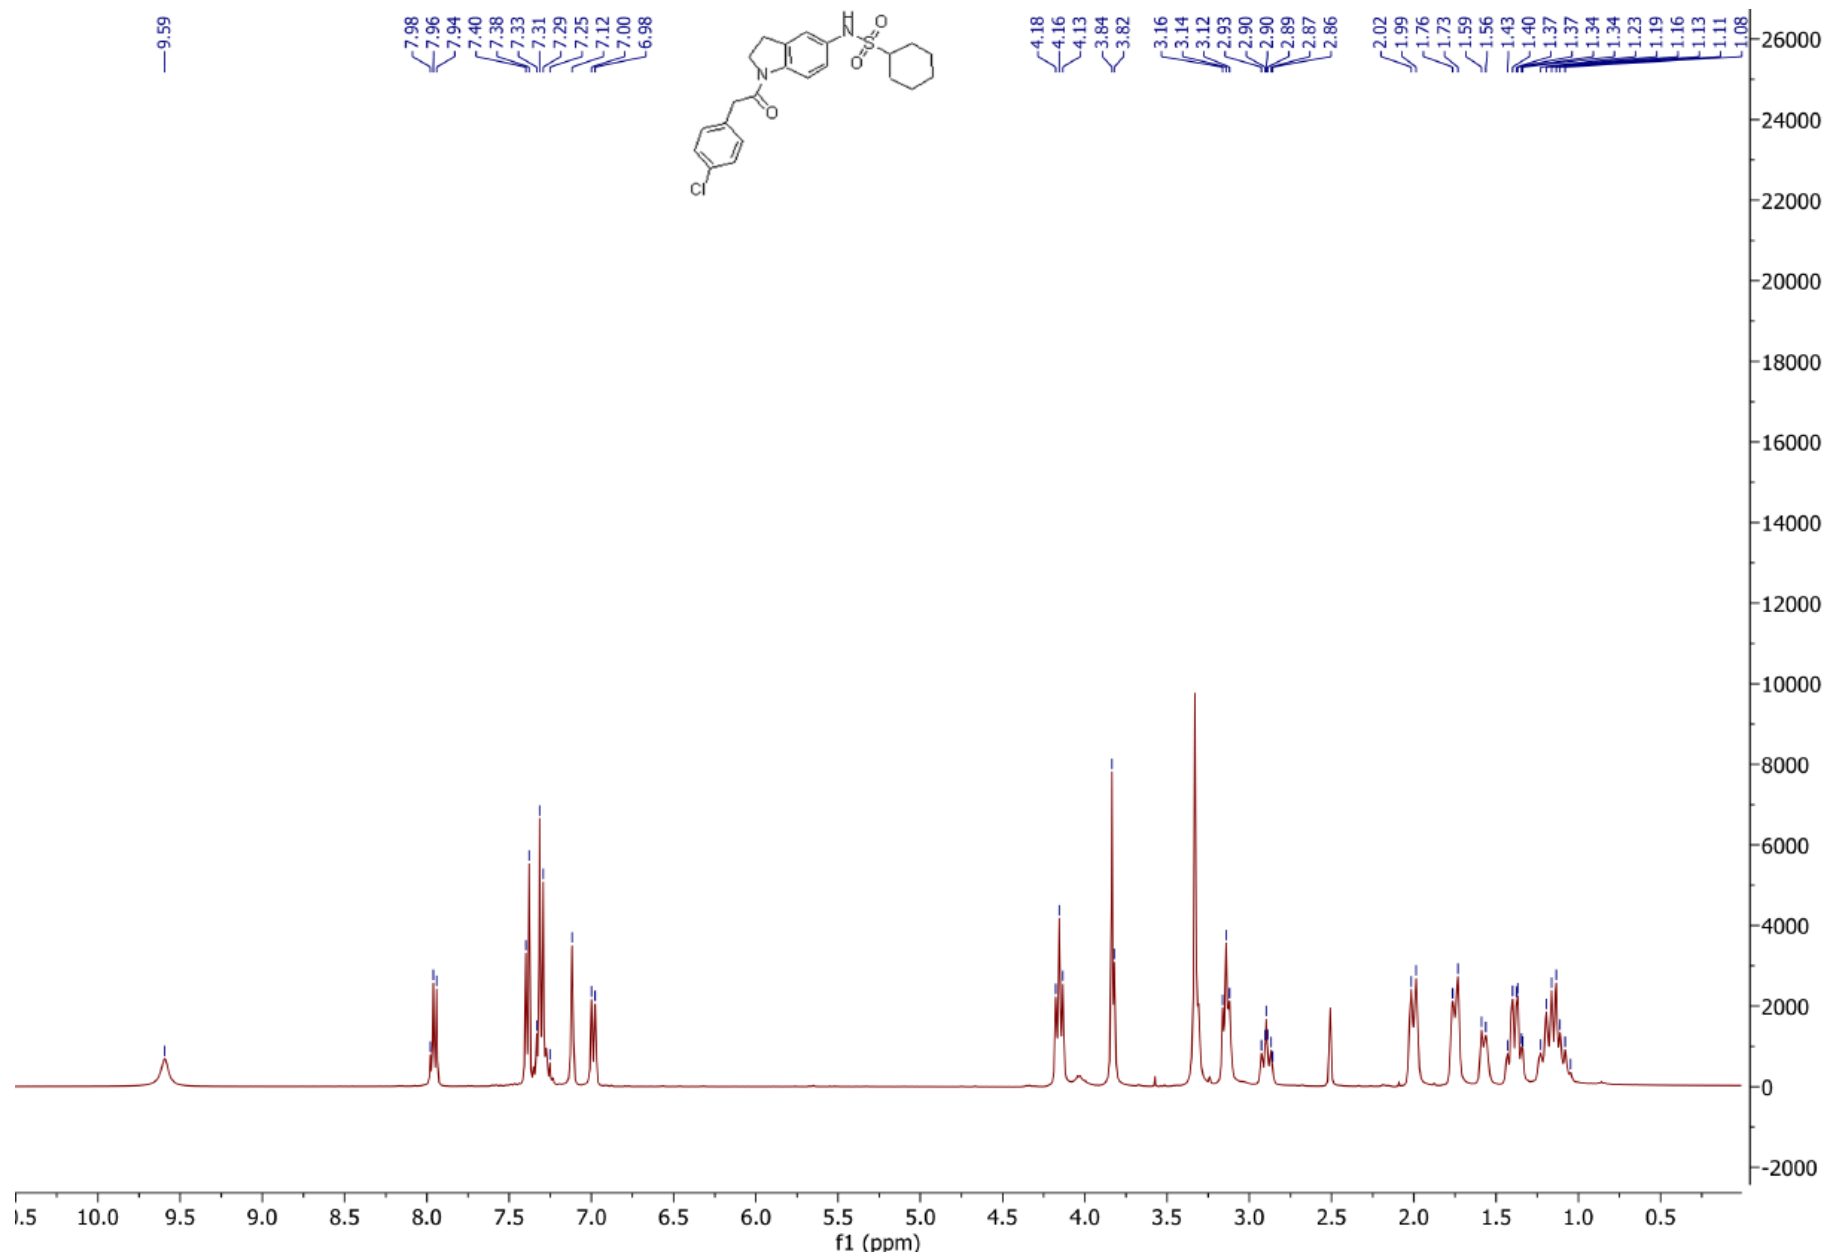

<sup>1</sup>H NMR of compound **16b**

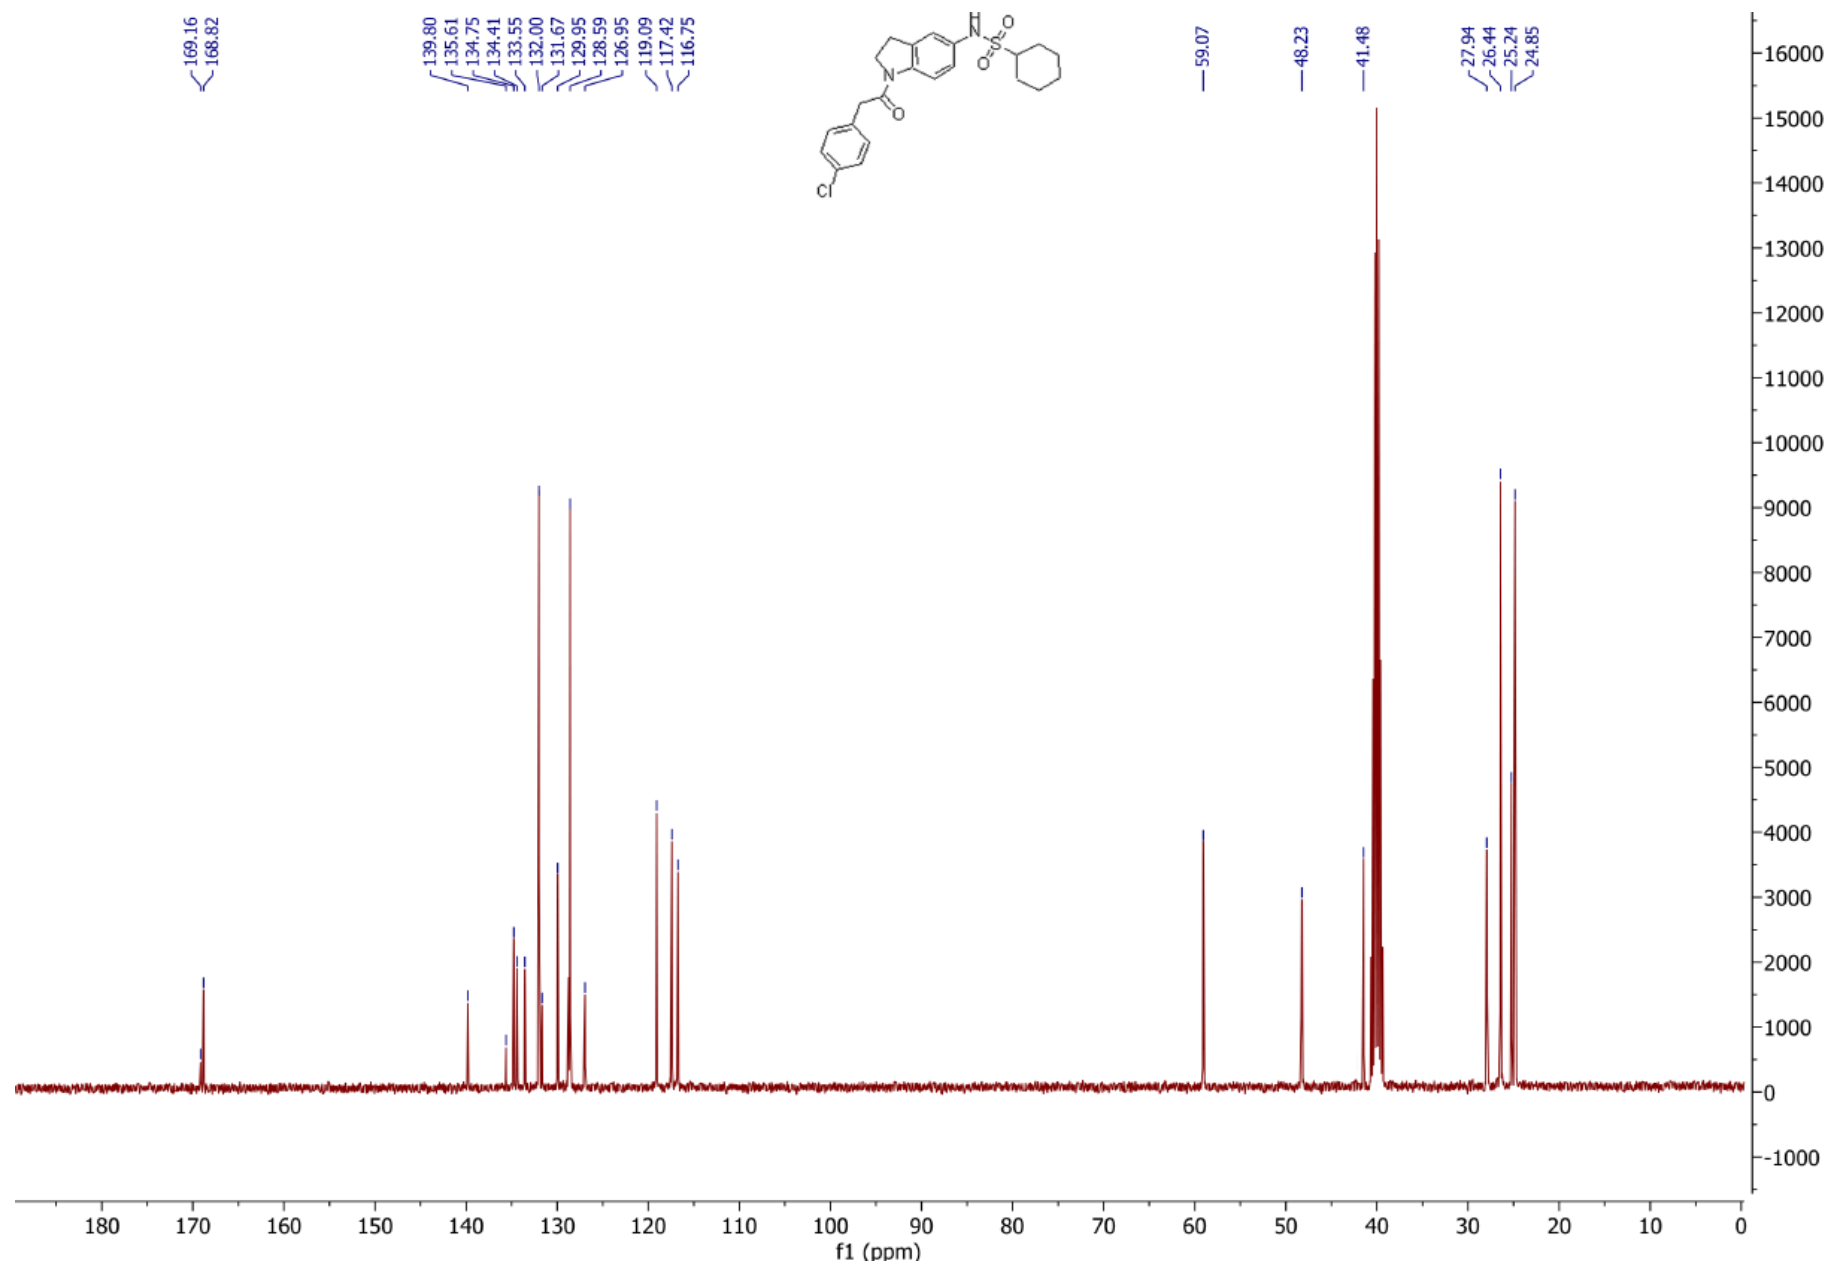

<sup>13</sup>C NMR of compound **16b**



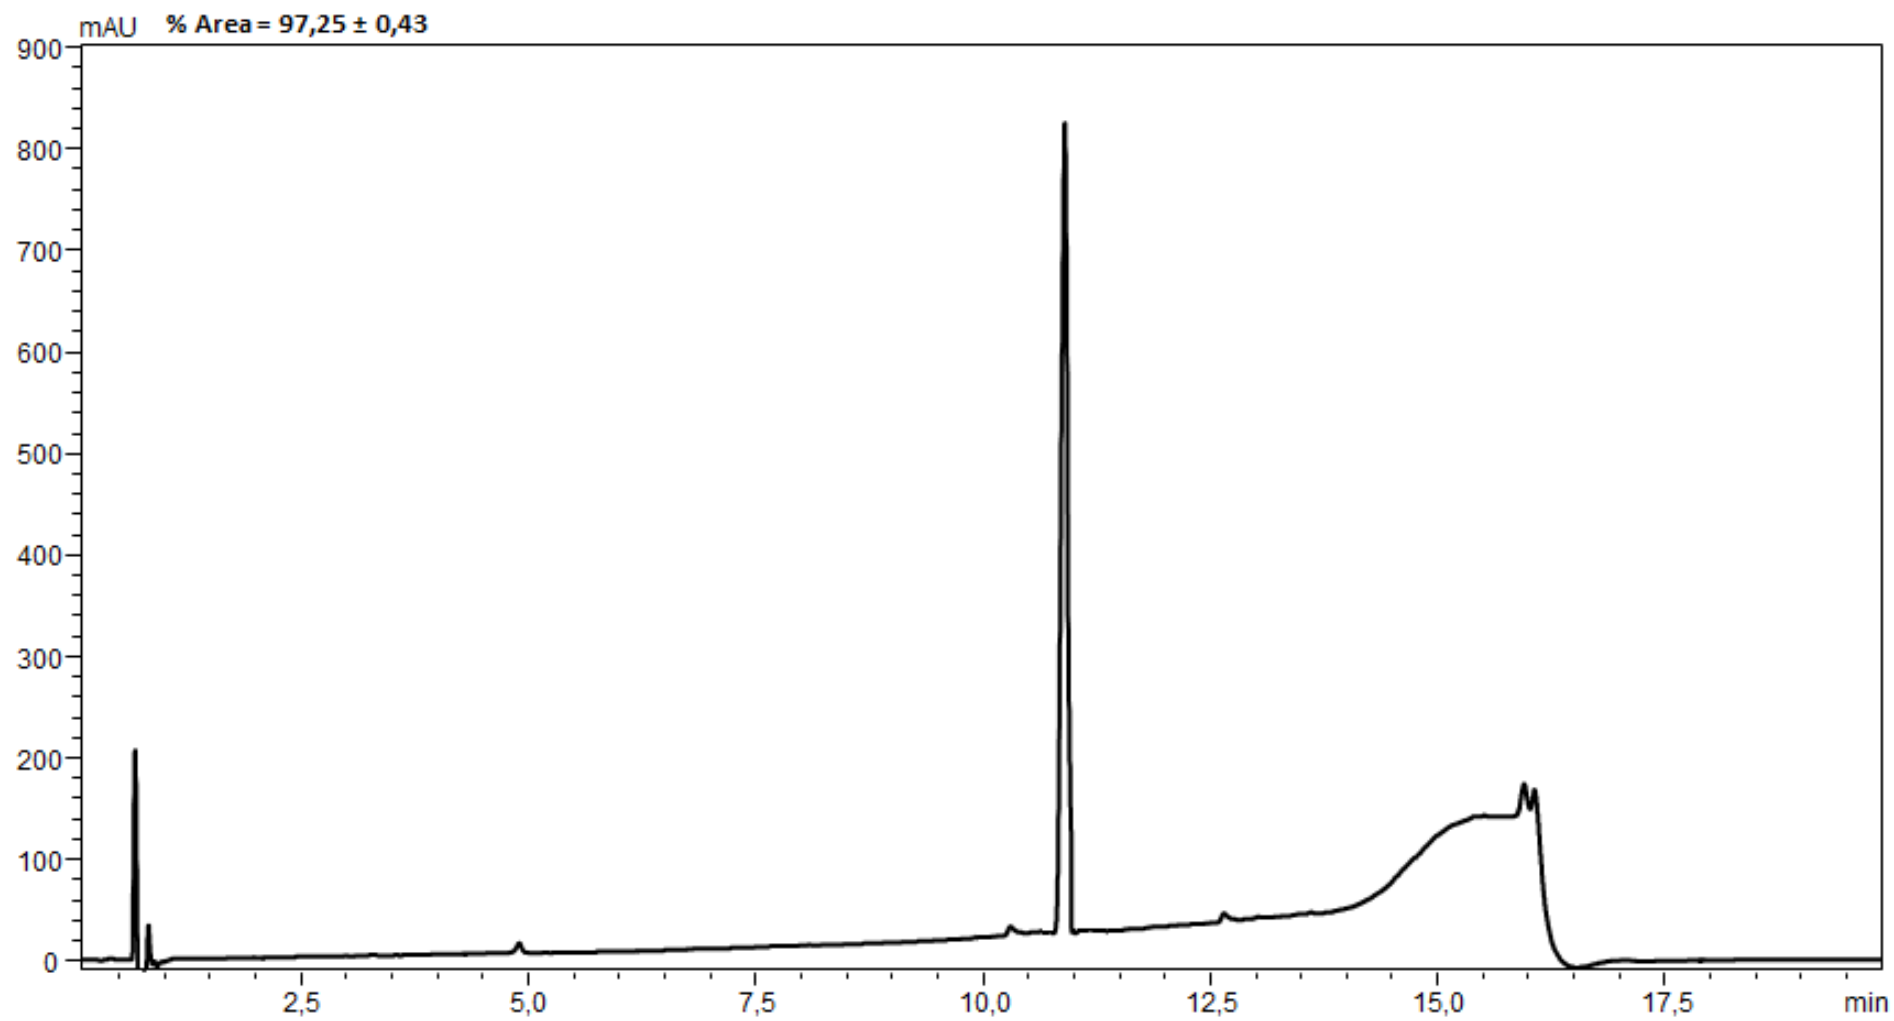

RP-HPLC trace of compound **16b**

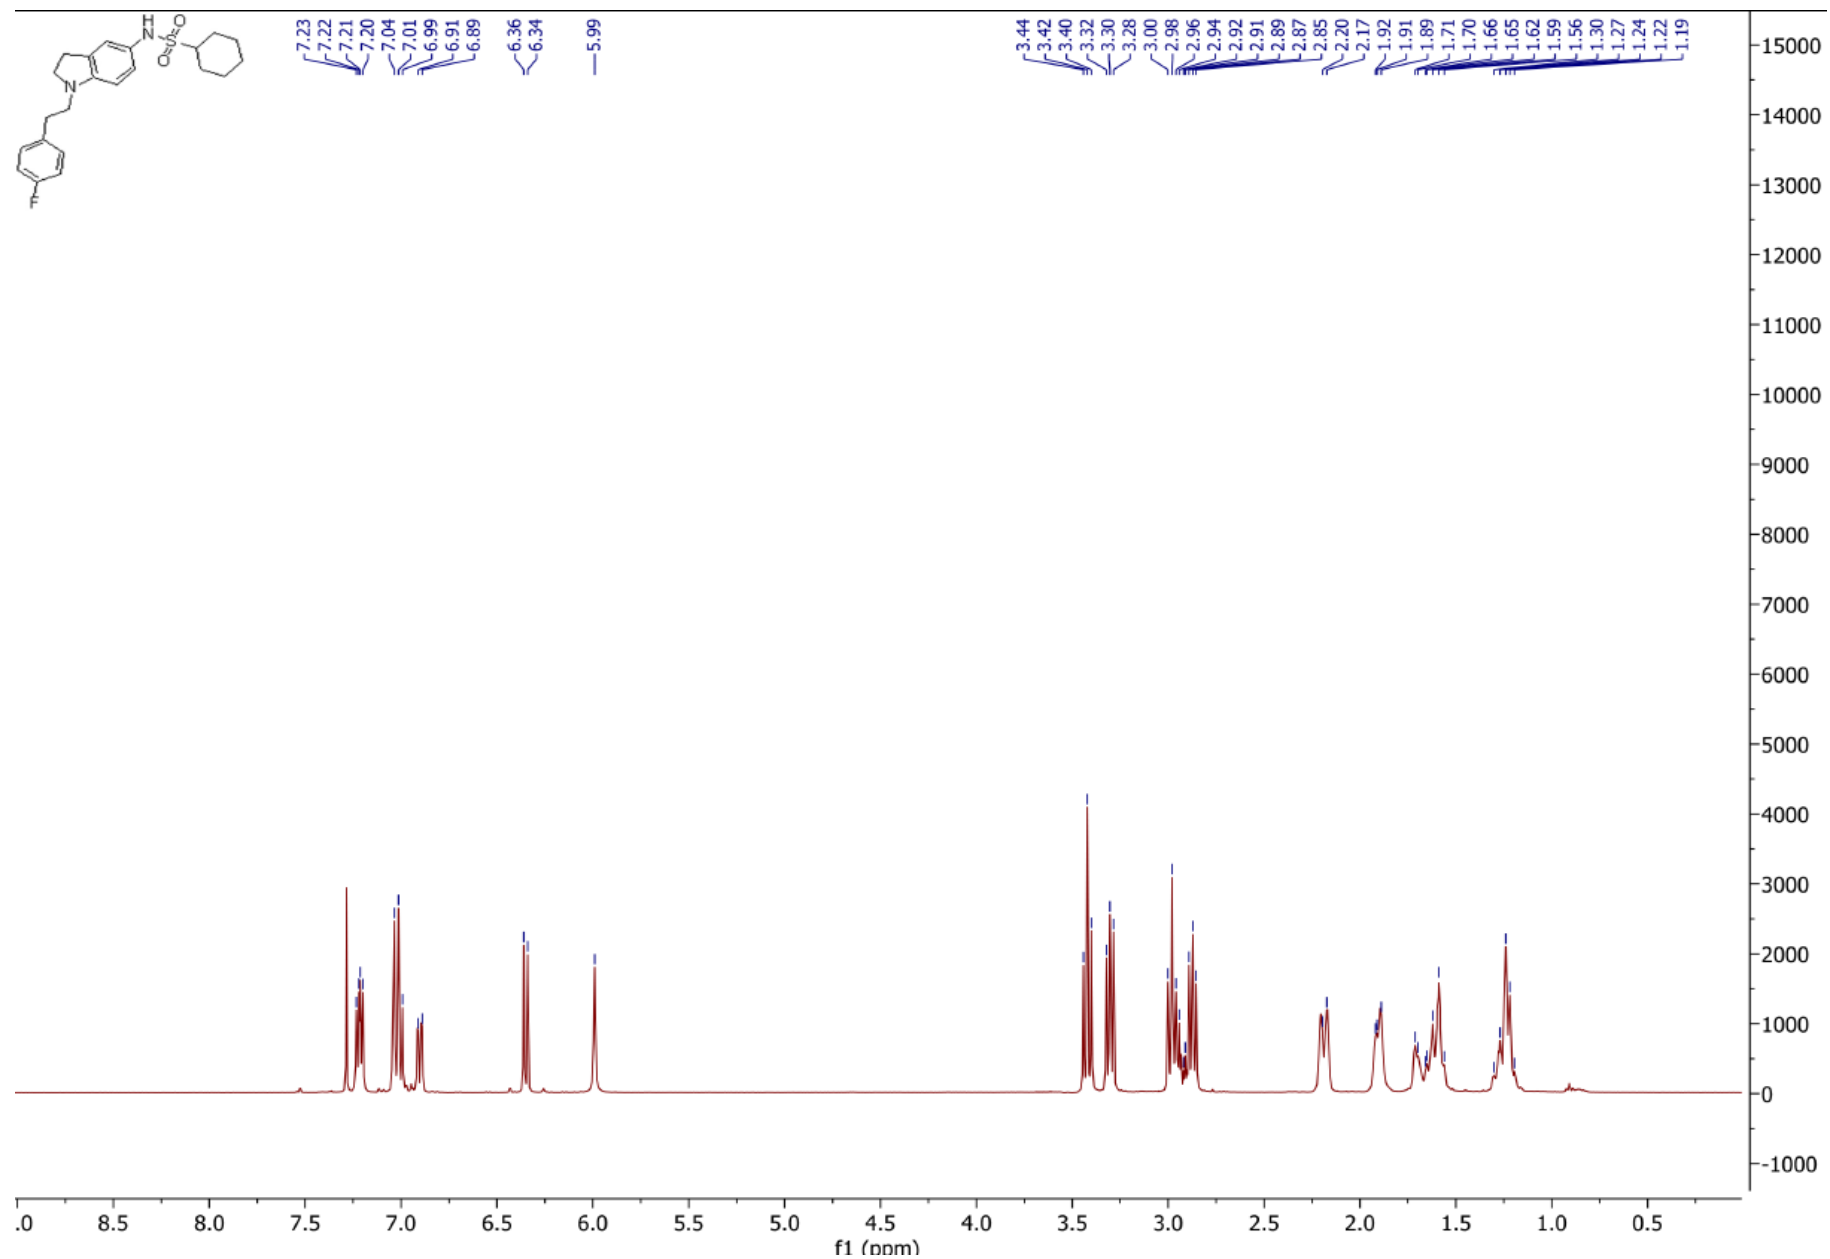

<sup>1</sup>H NMR of compound **19**

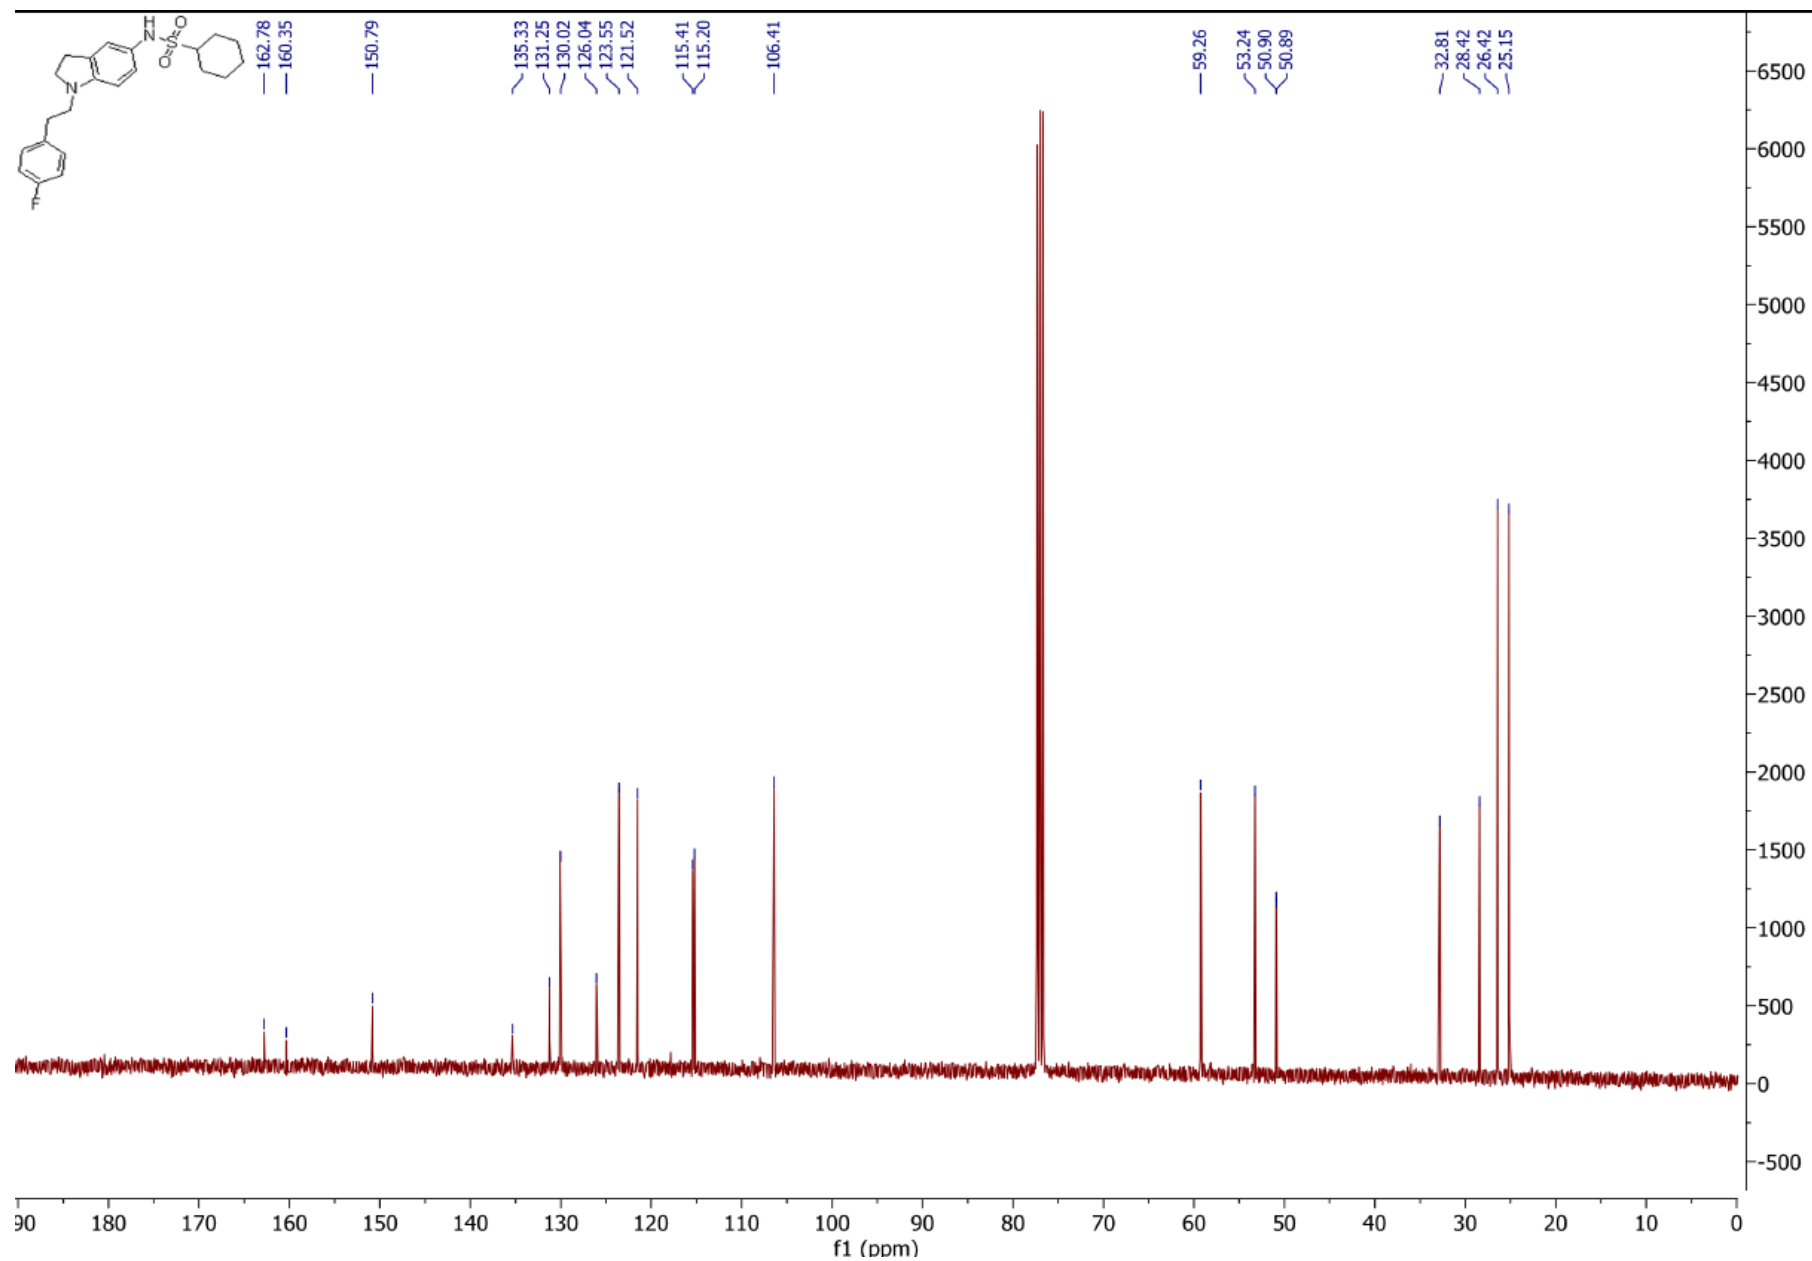

<sup>13</sup>C NMR of compound **19**

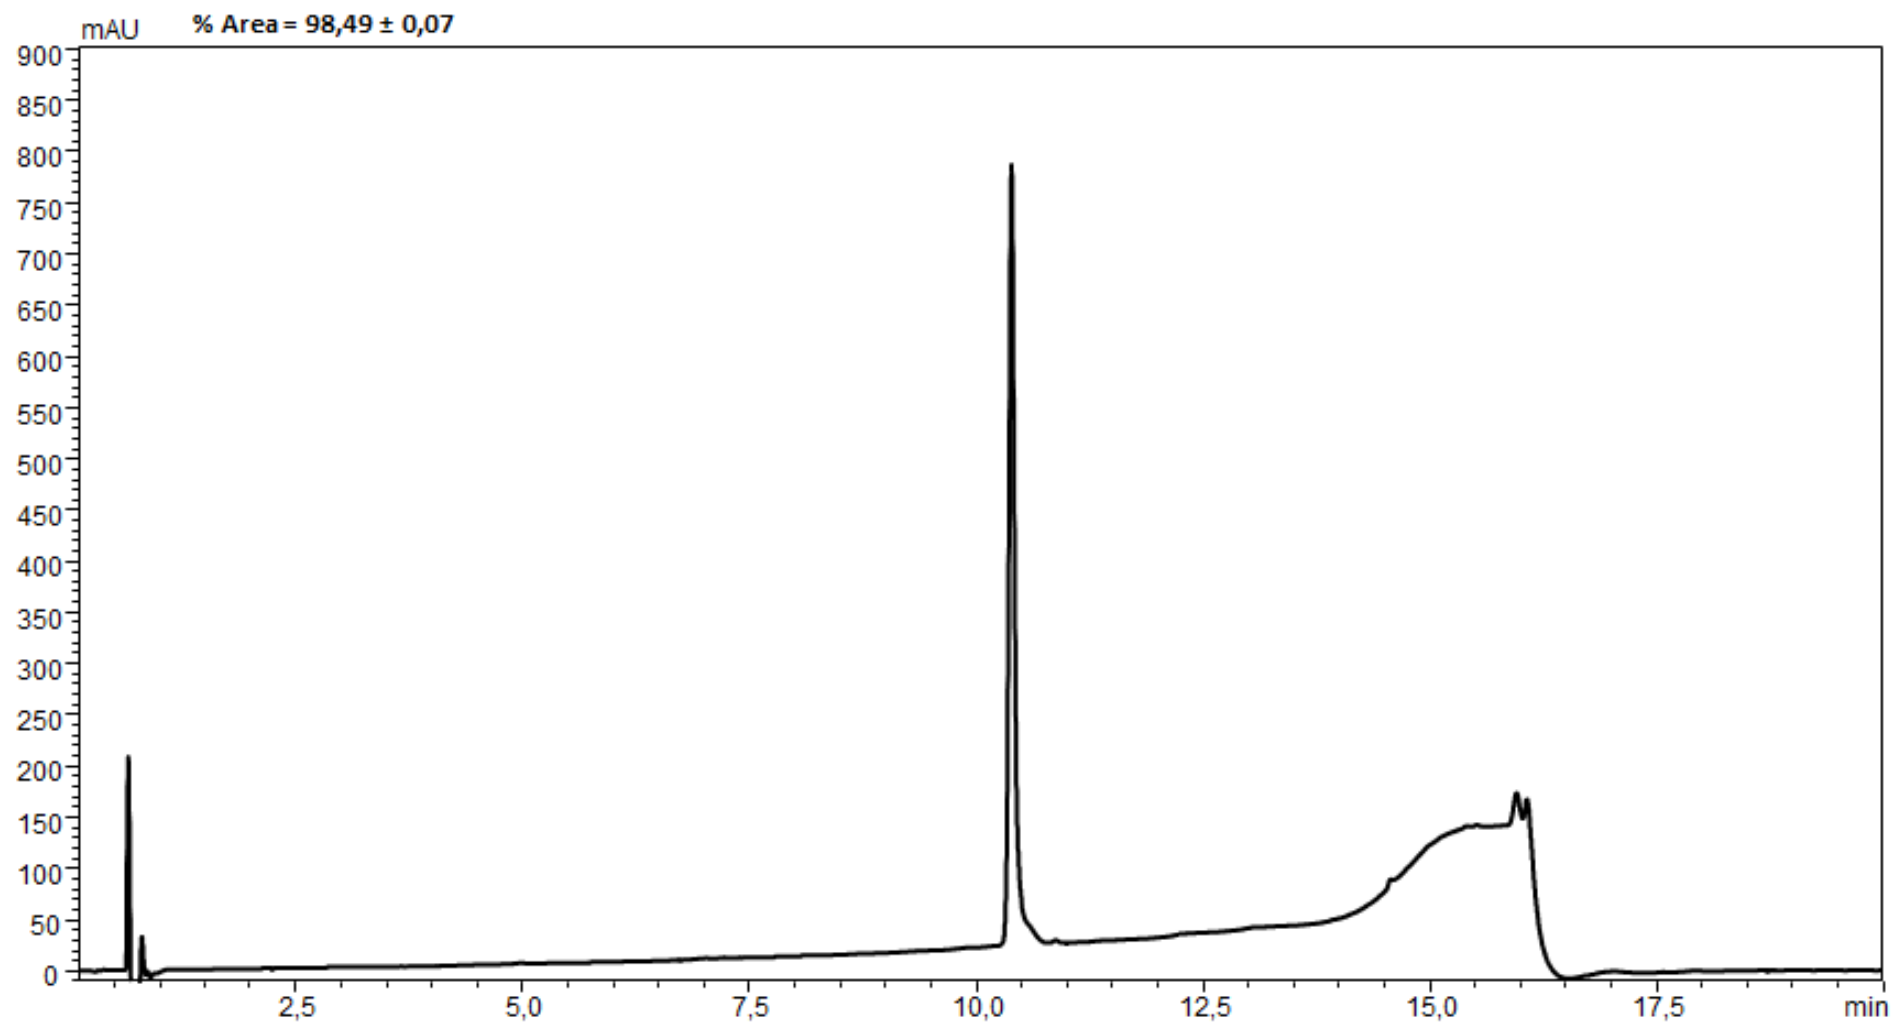

RP-HPLC trace of compound **19**

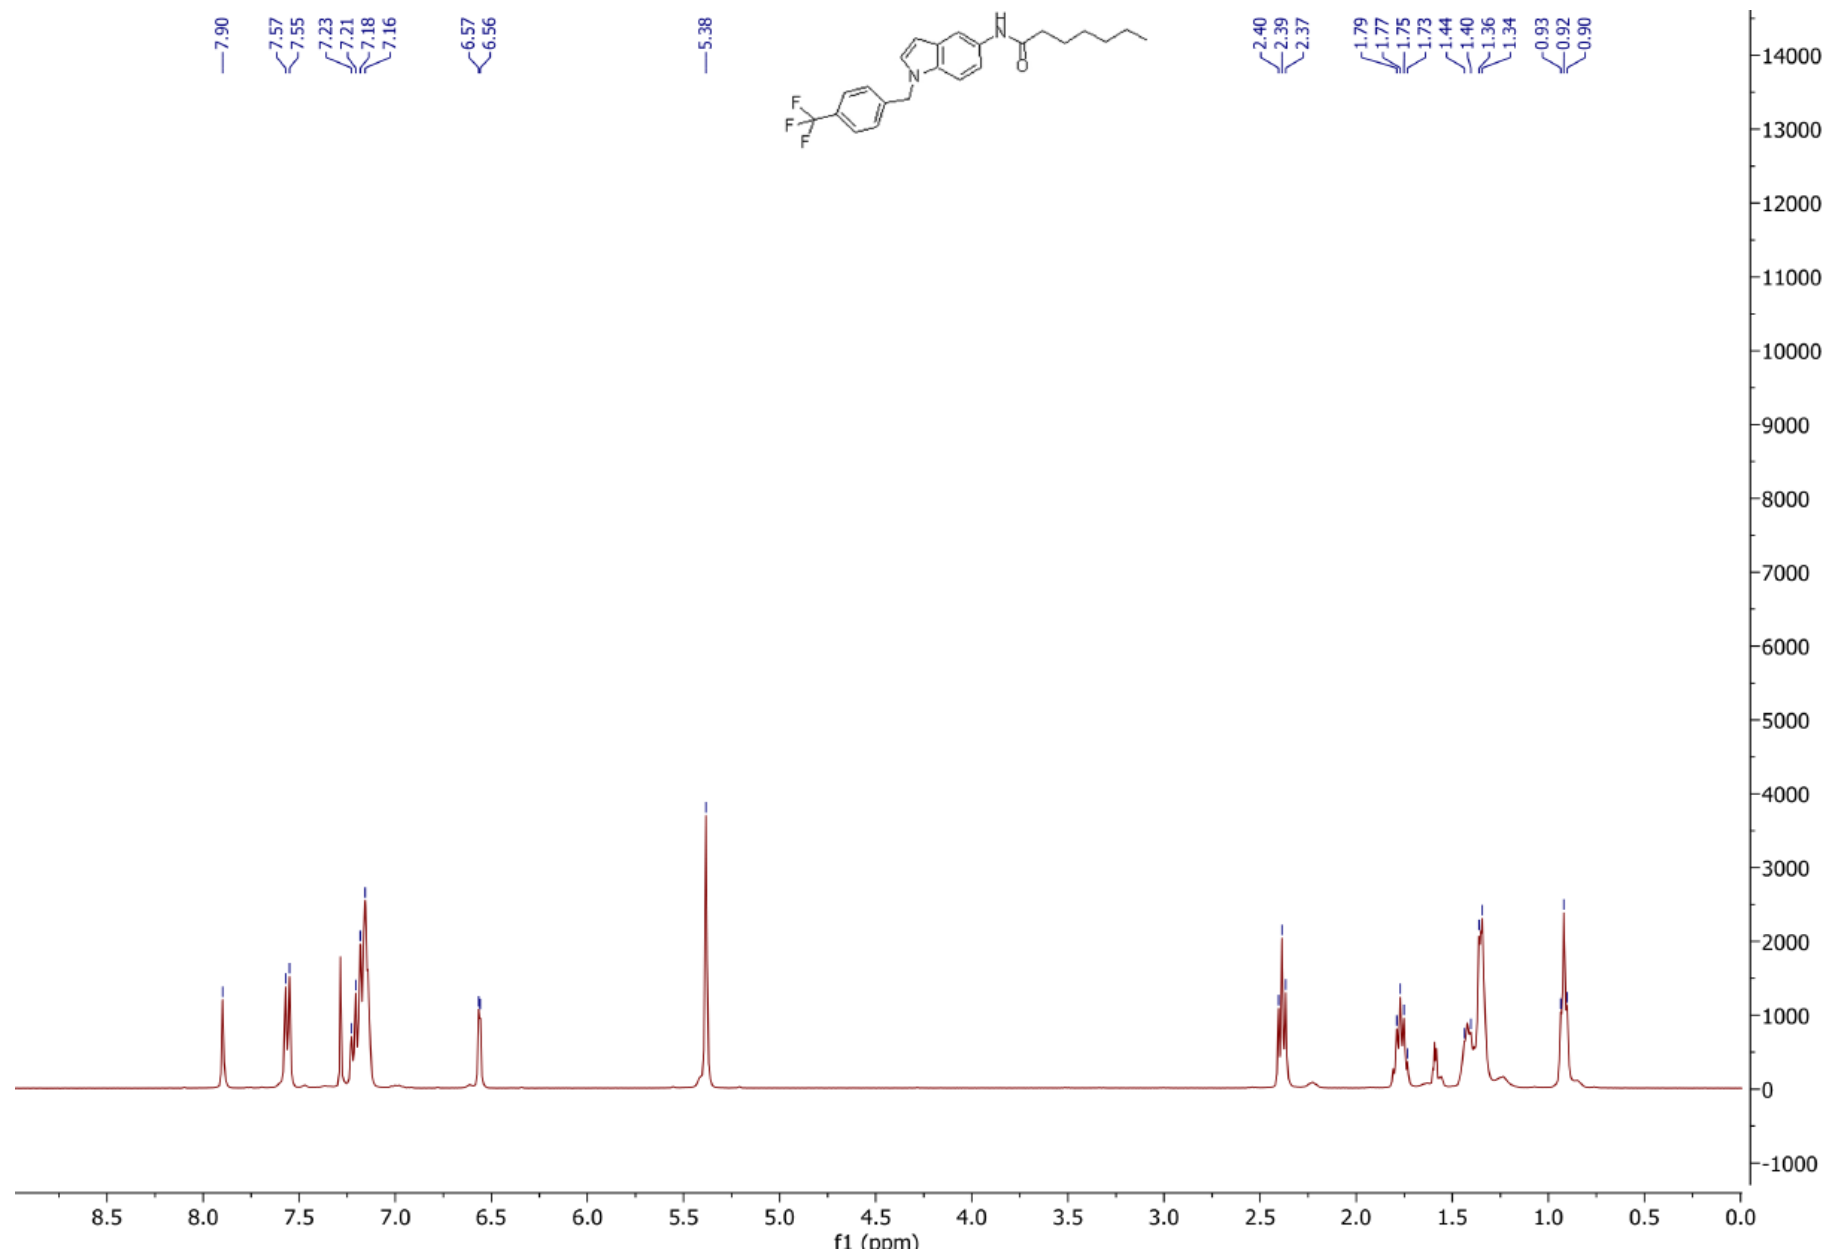

<sup>1</sup>H NMR of compound **23a**

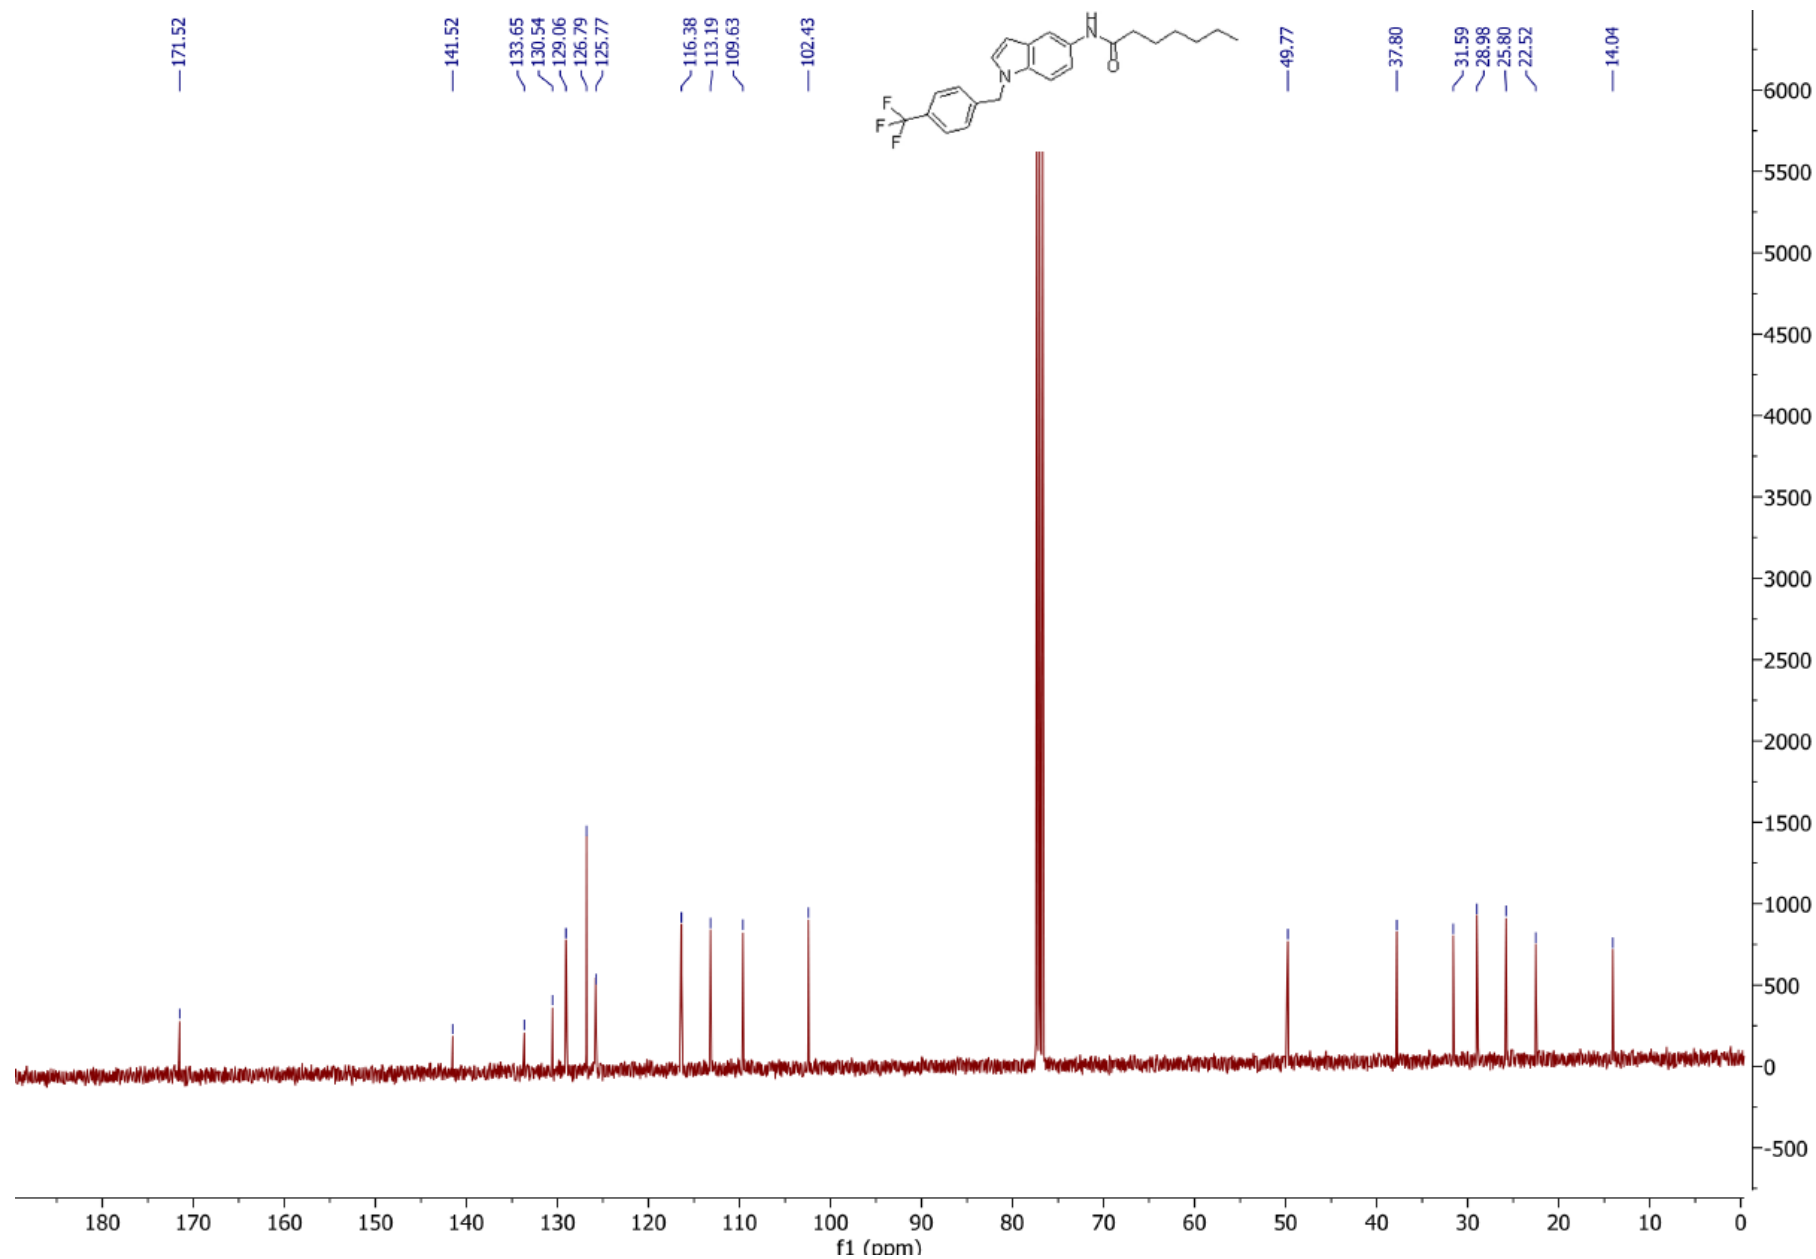

<sup>13</sup>C NMR of compound **23a**

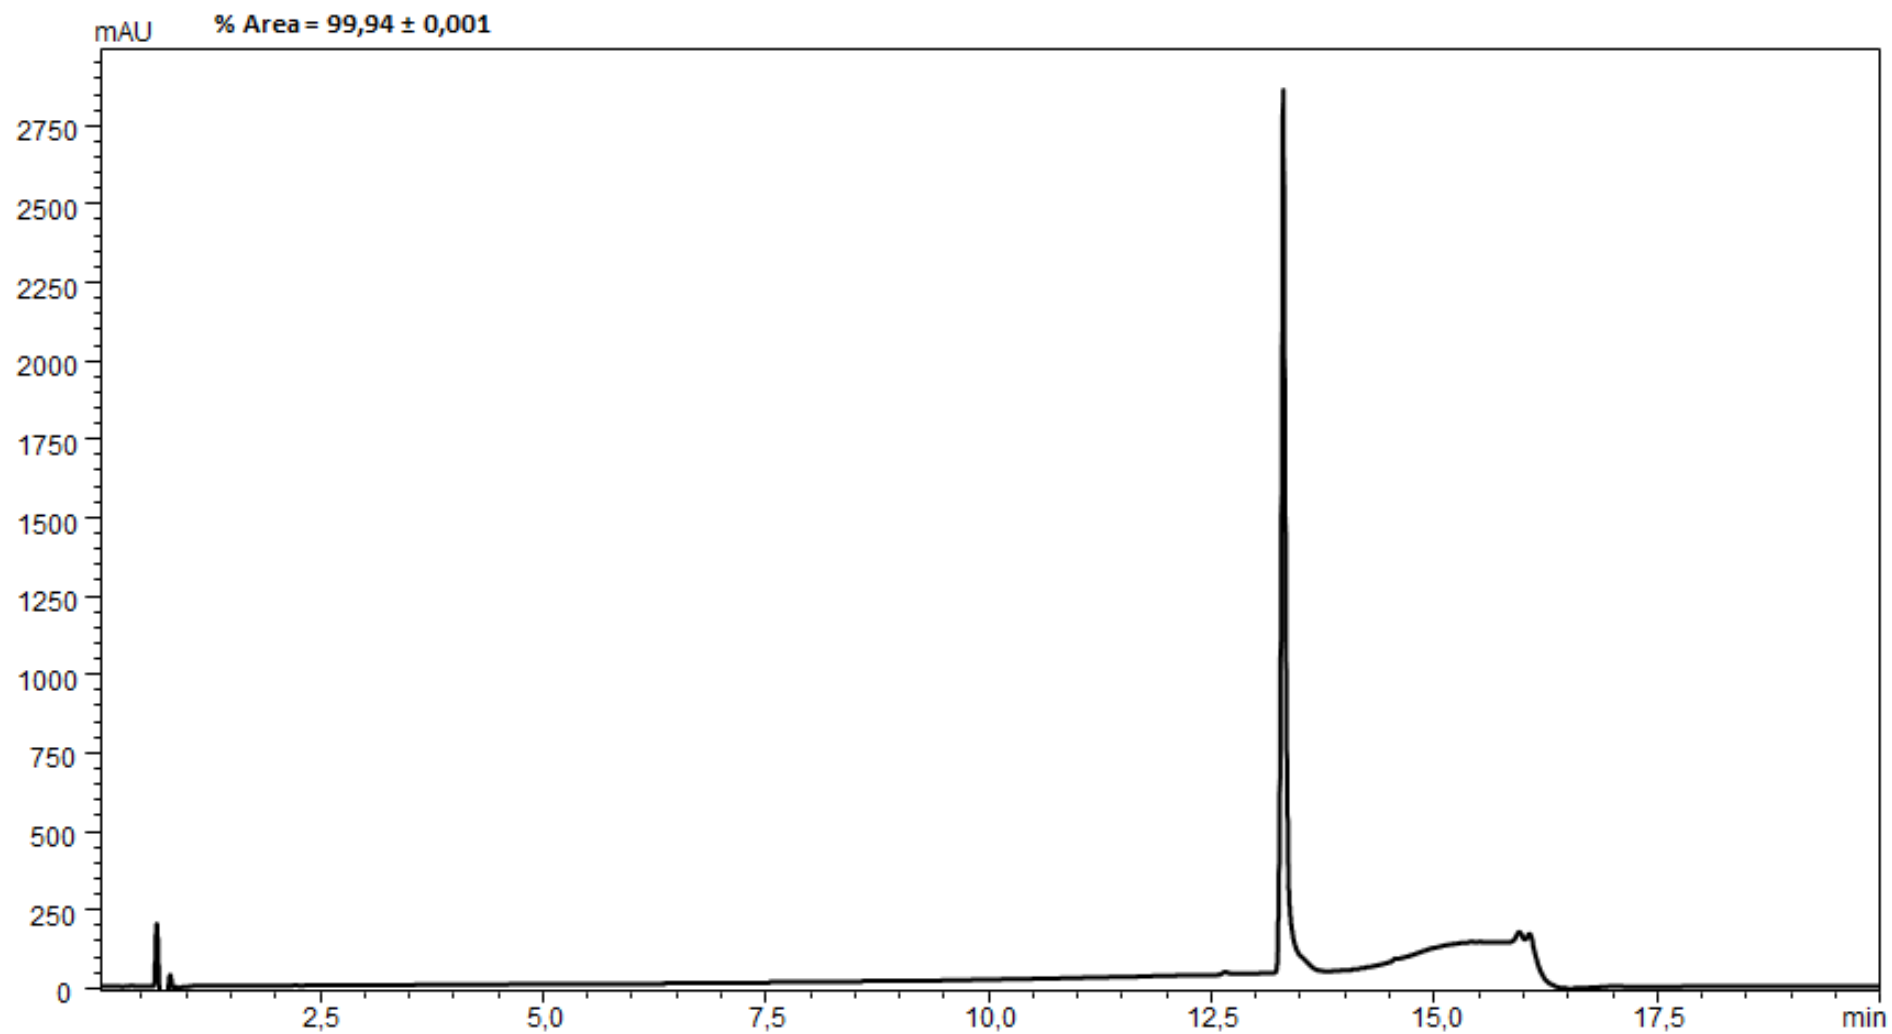

RP-HPLC of compound **23a**

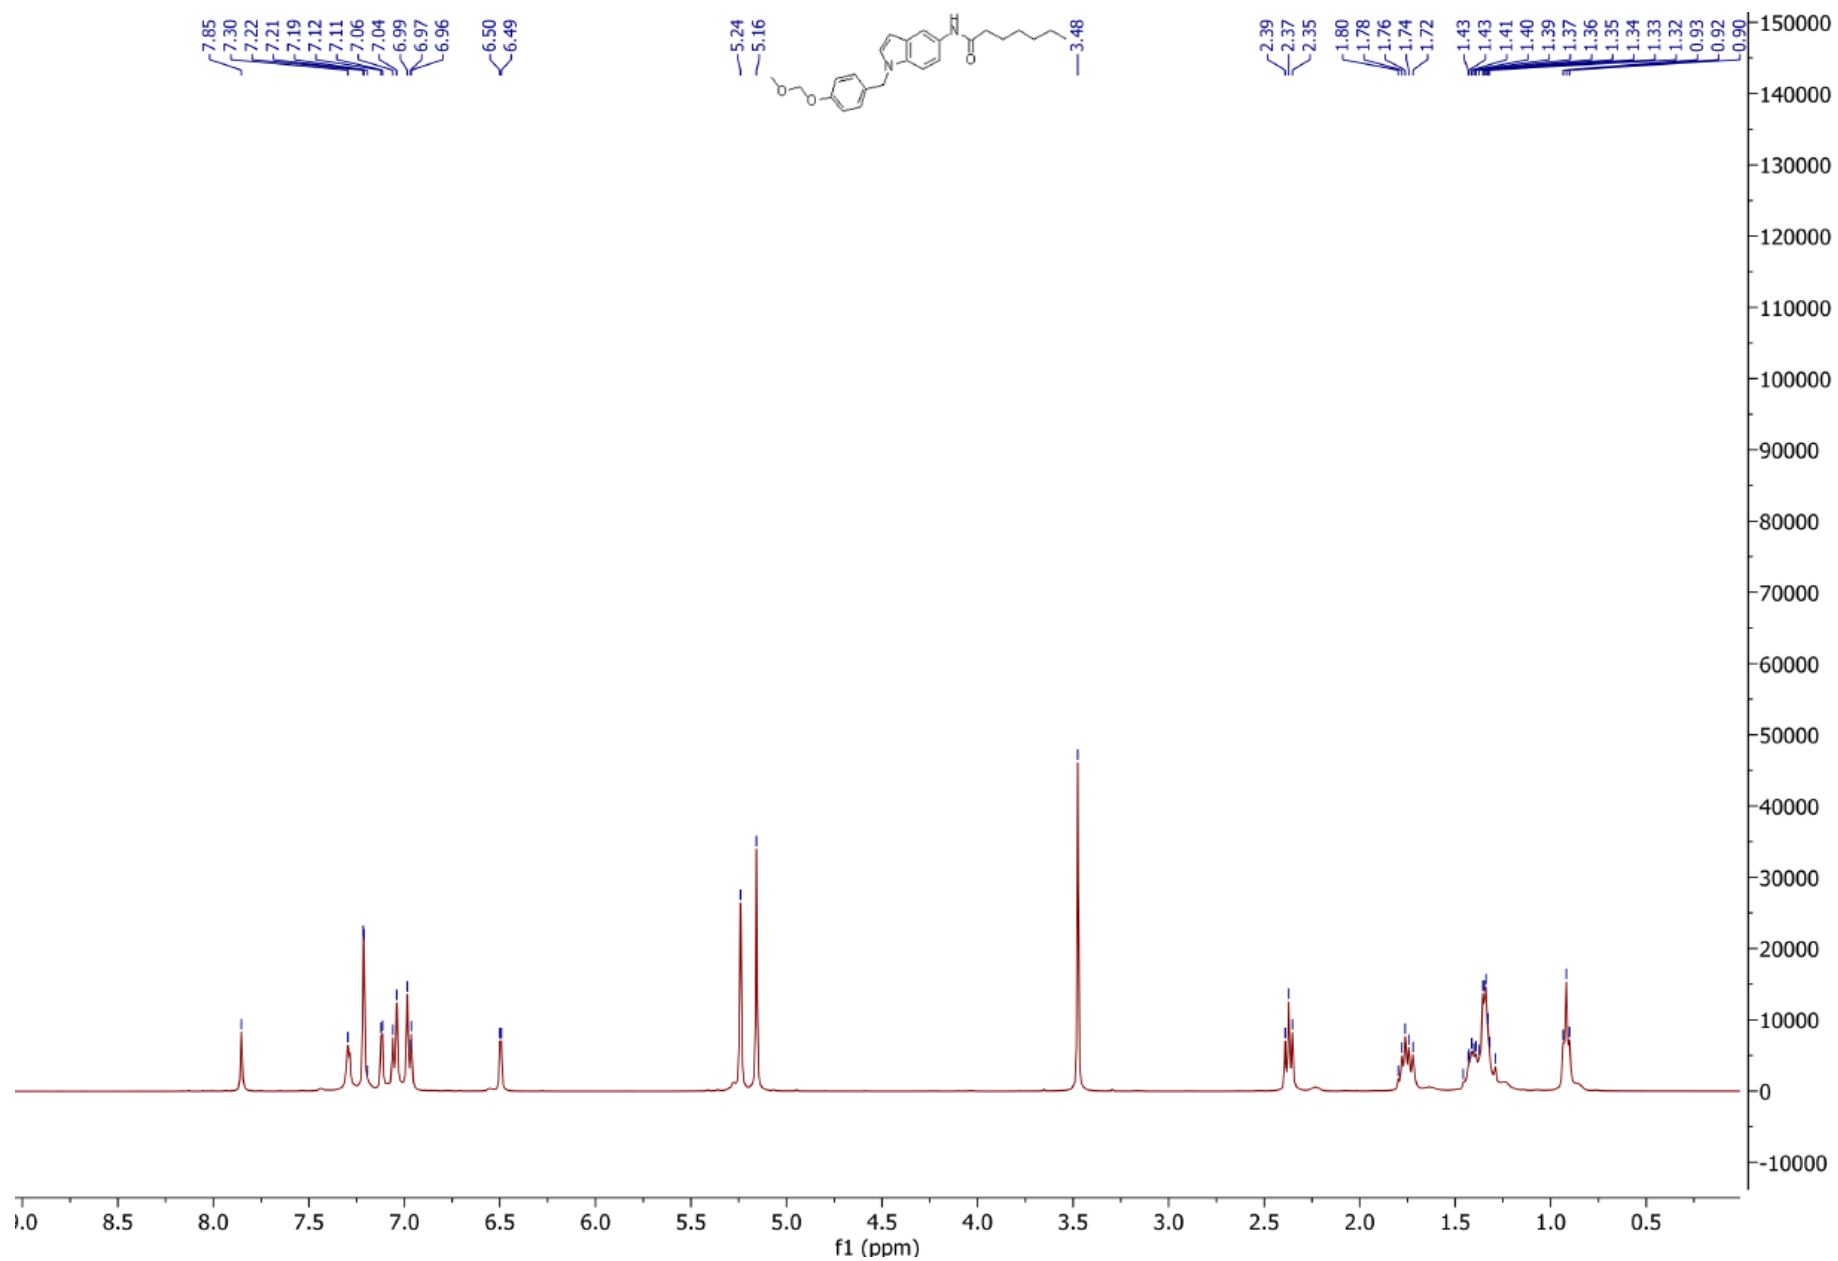

**<sup>1</sup>H NMR of compound 23b**



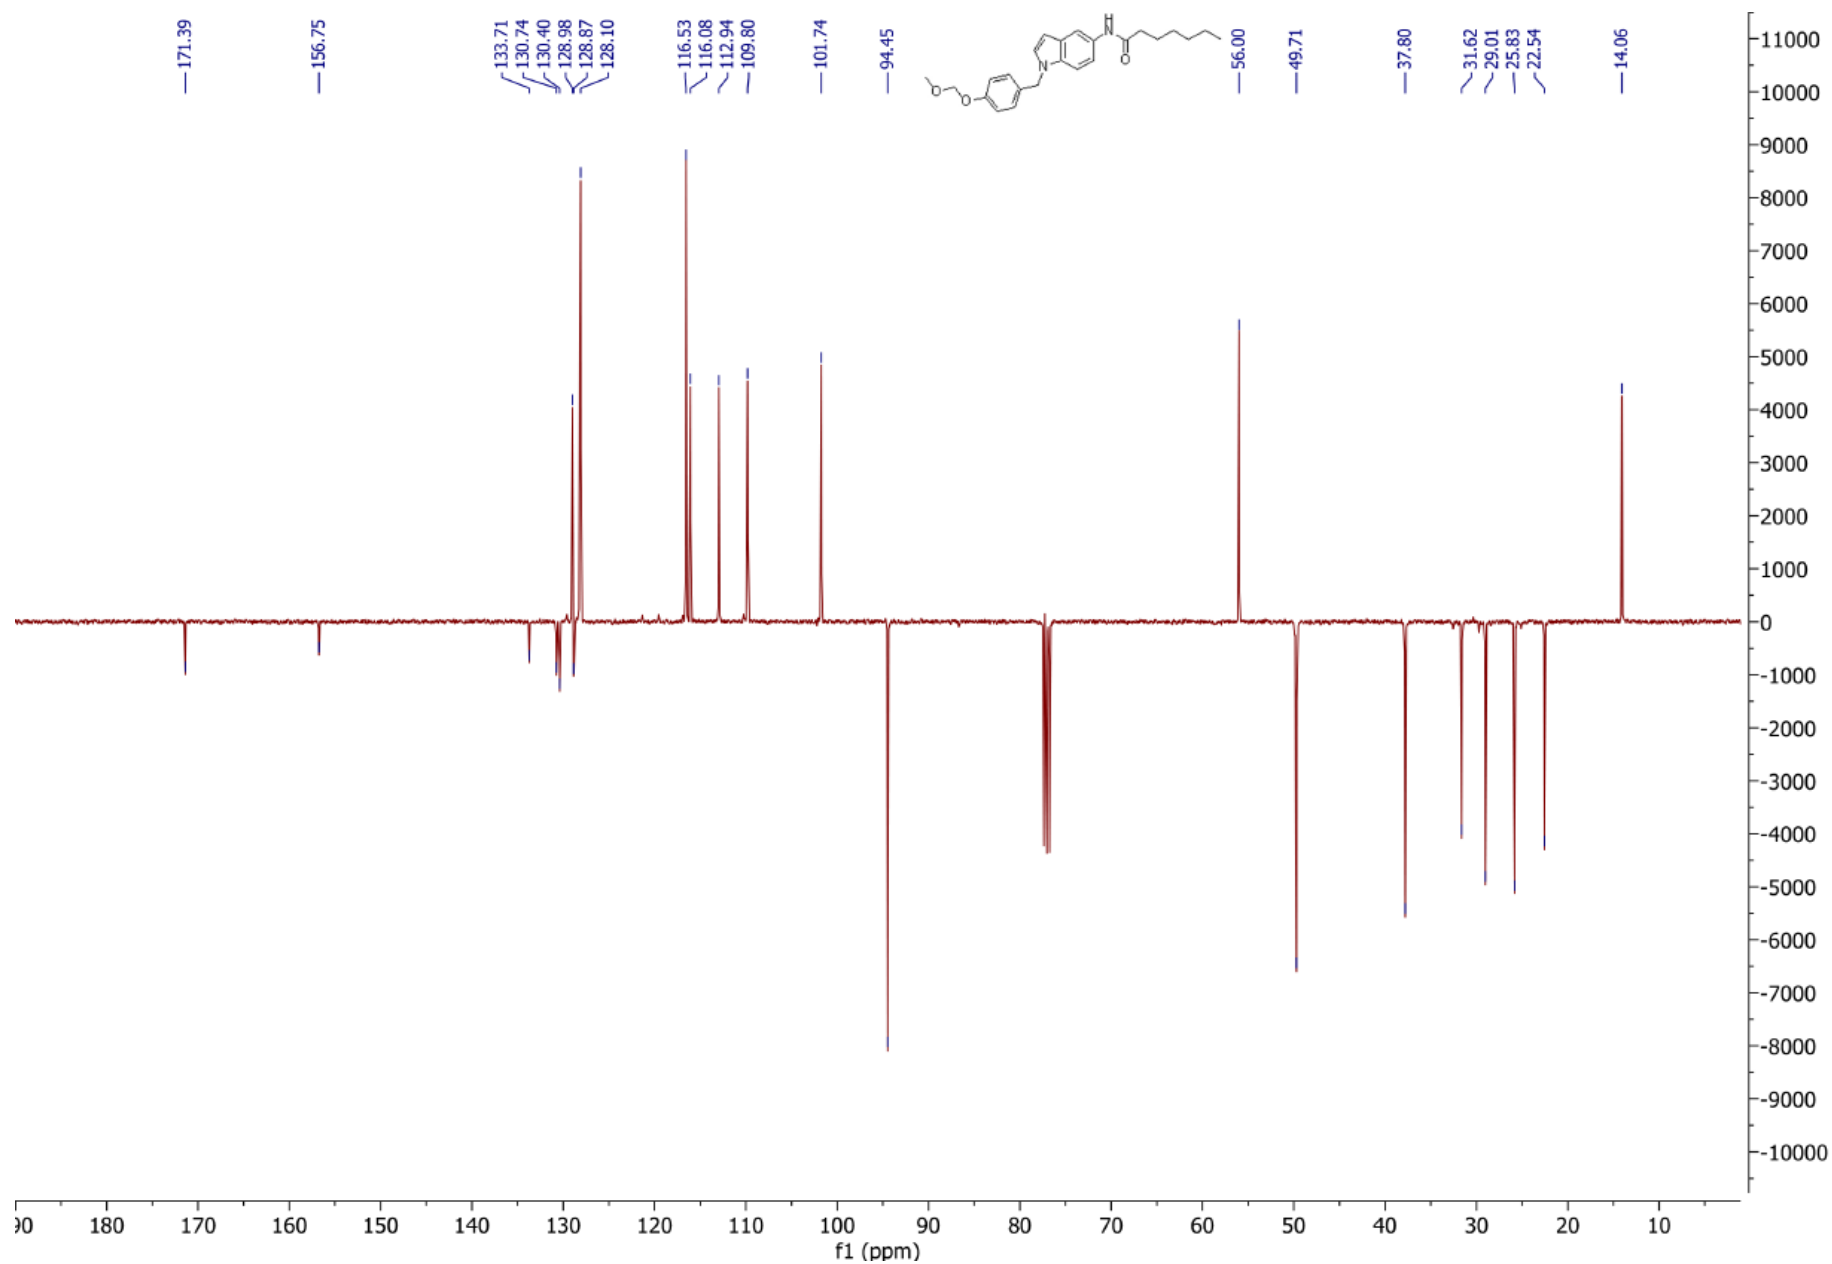

qDEPT NMR of compound **23b**

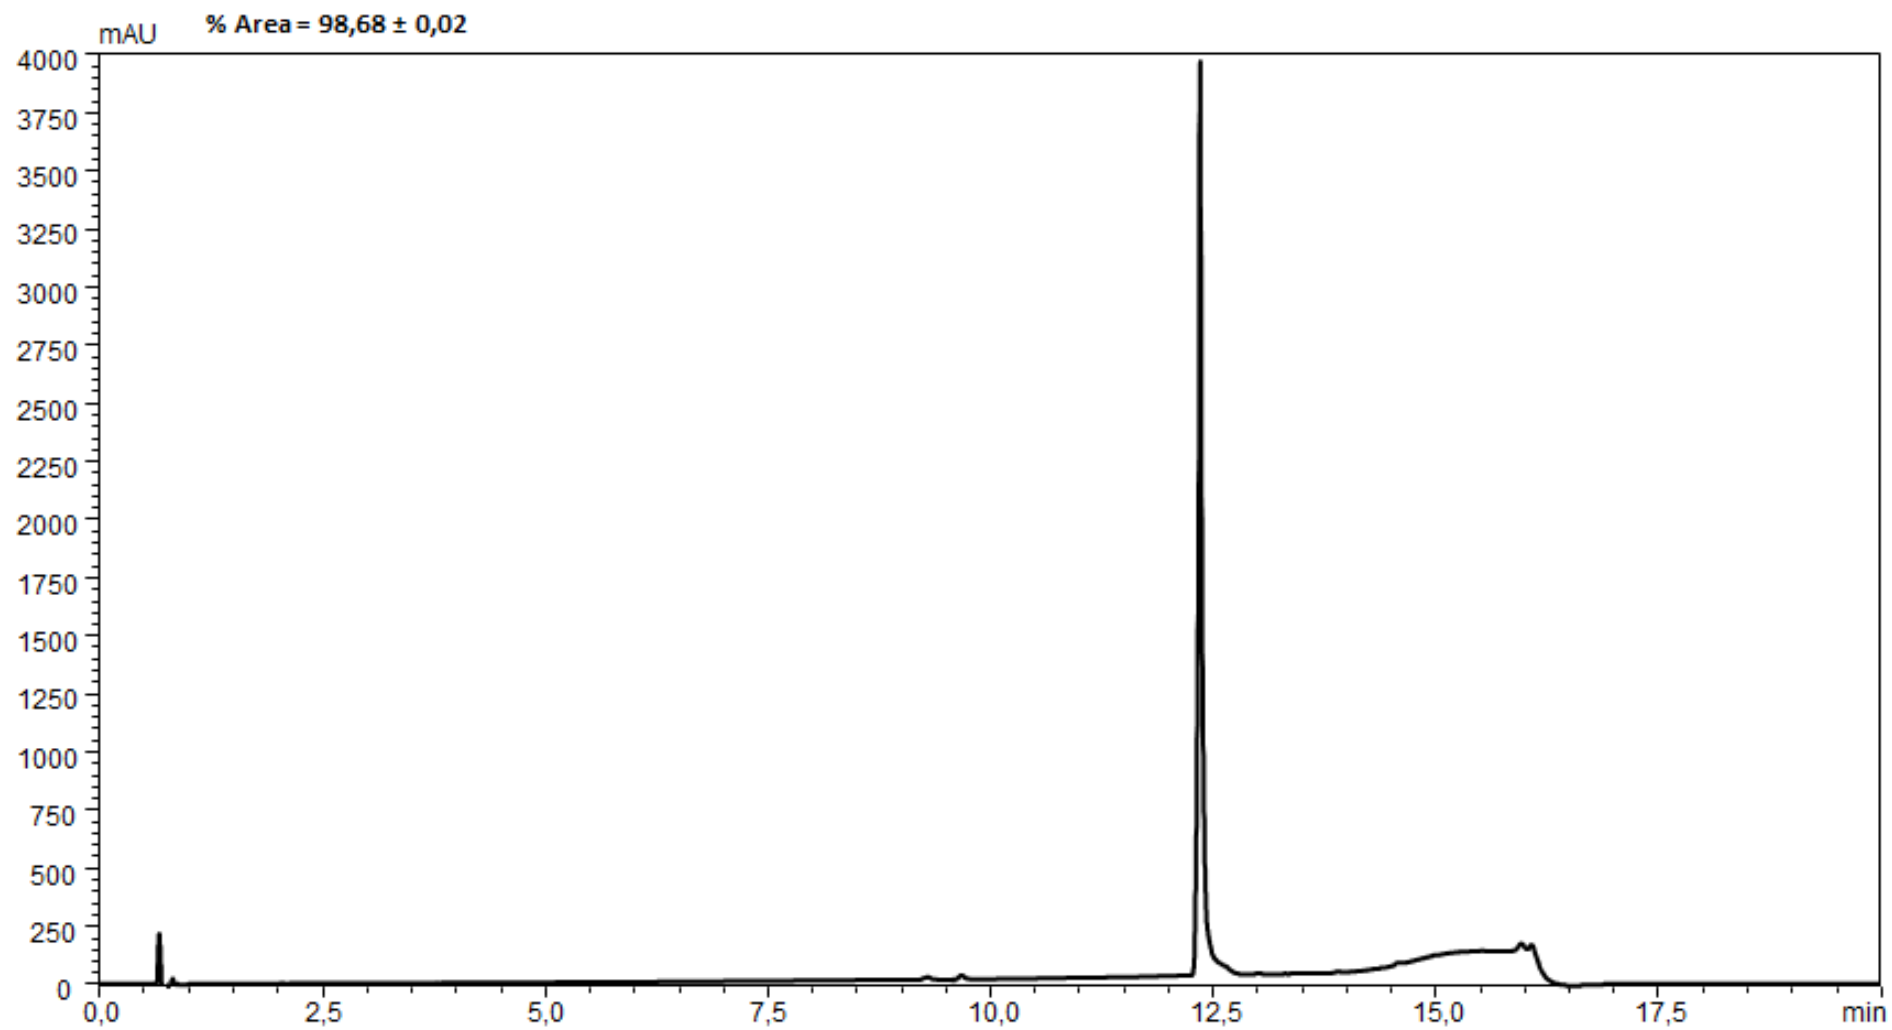

RP-HPLC trace of compound **23b**

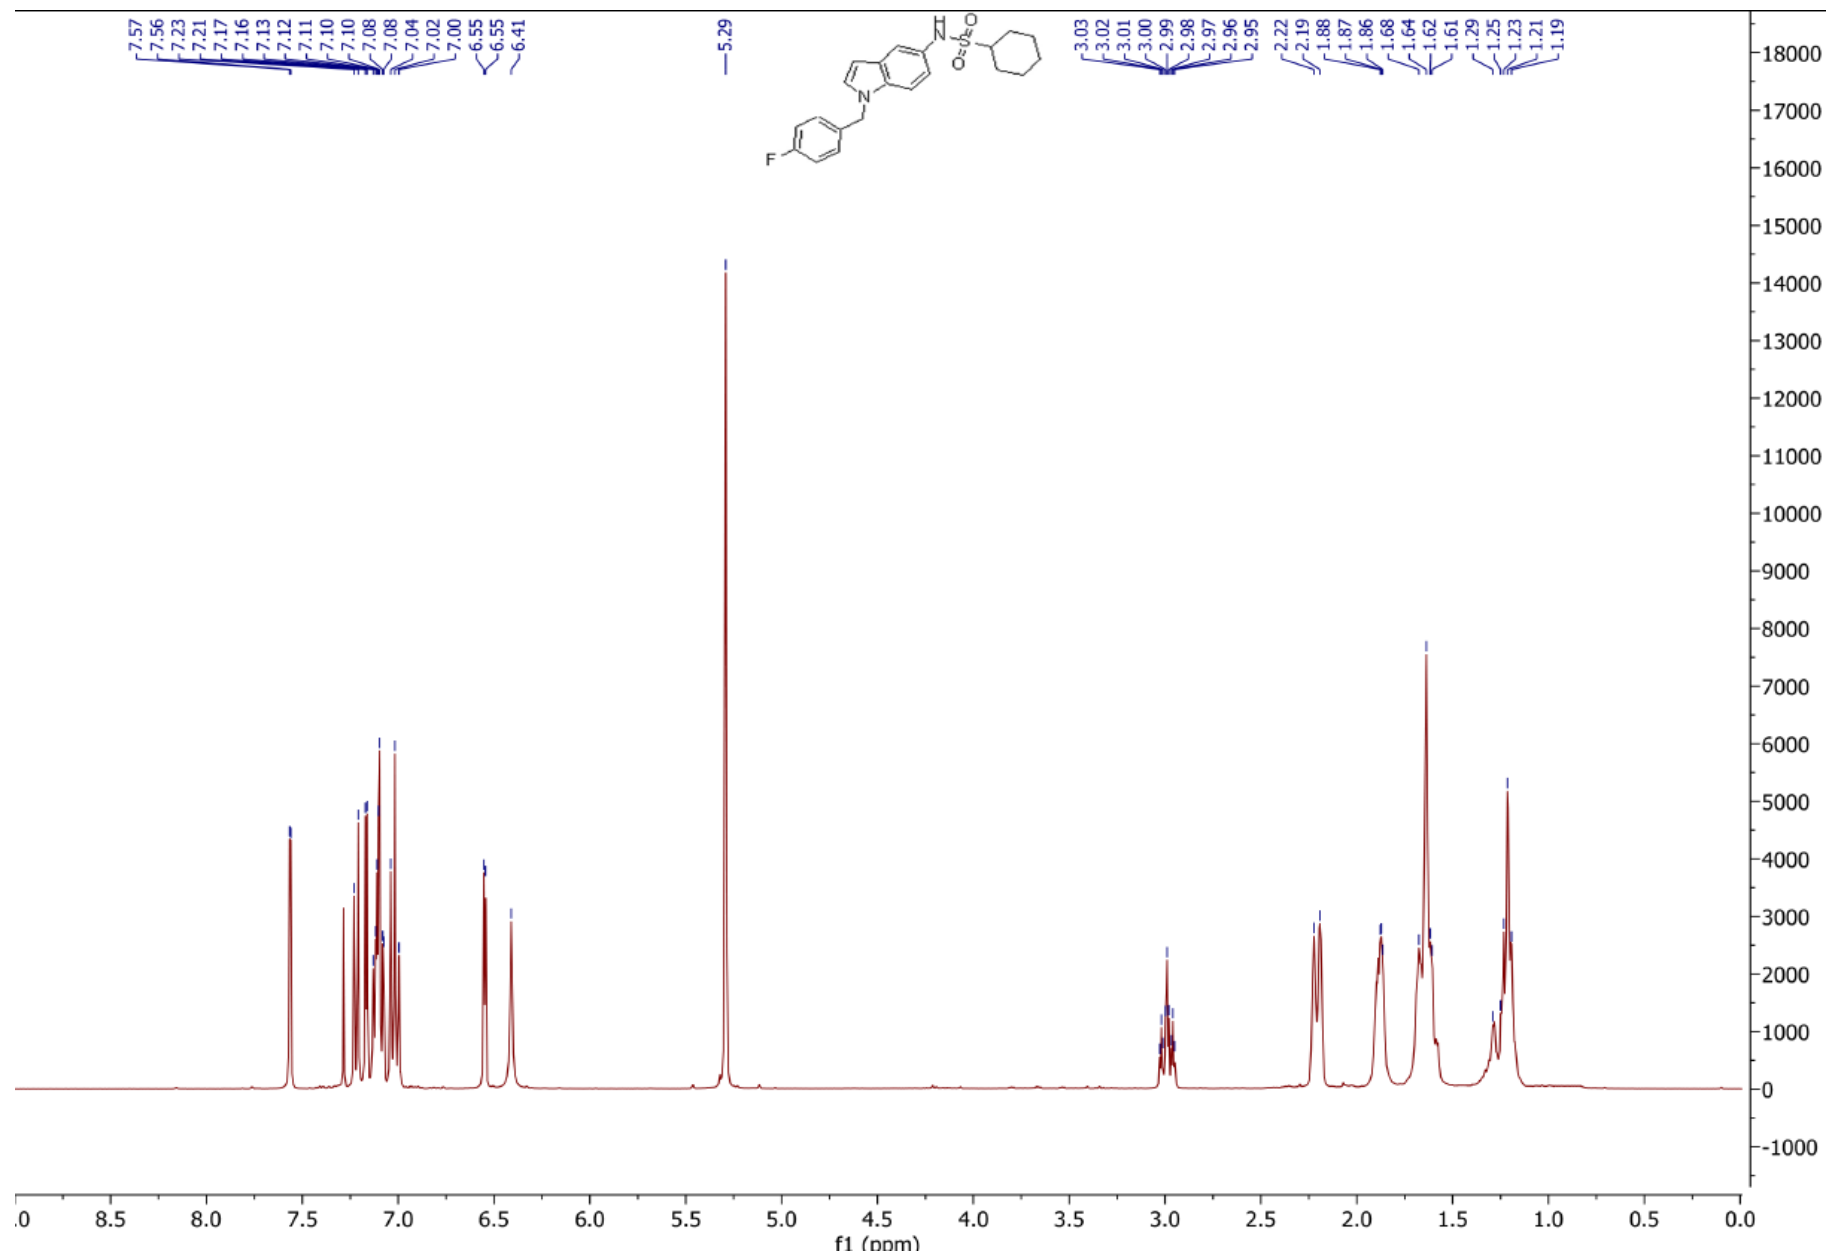

<sup>1</sup>H NMR of compound **23c**

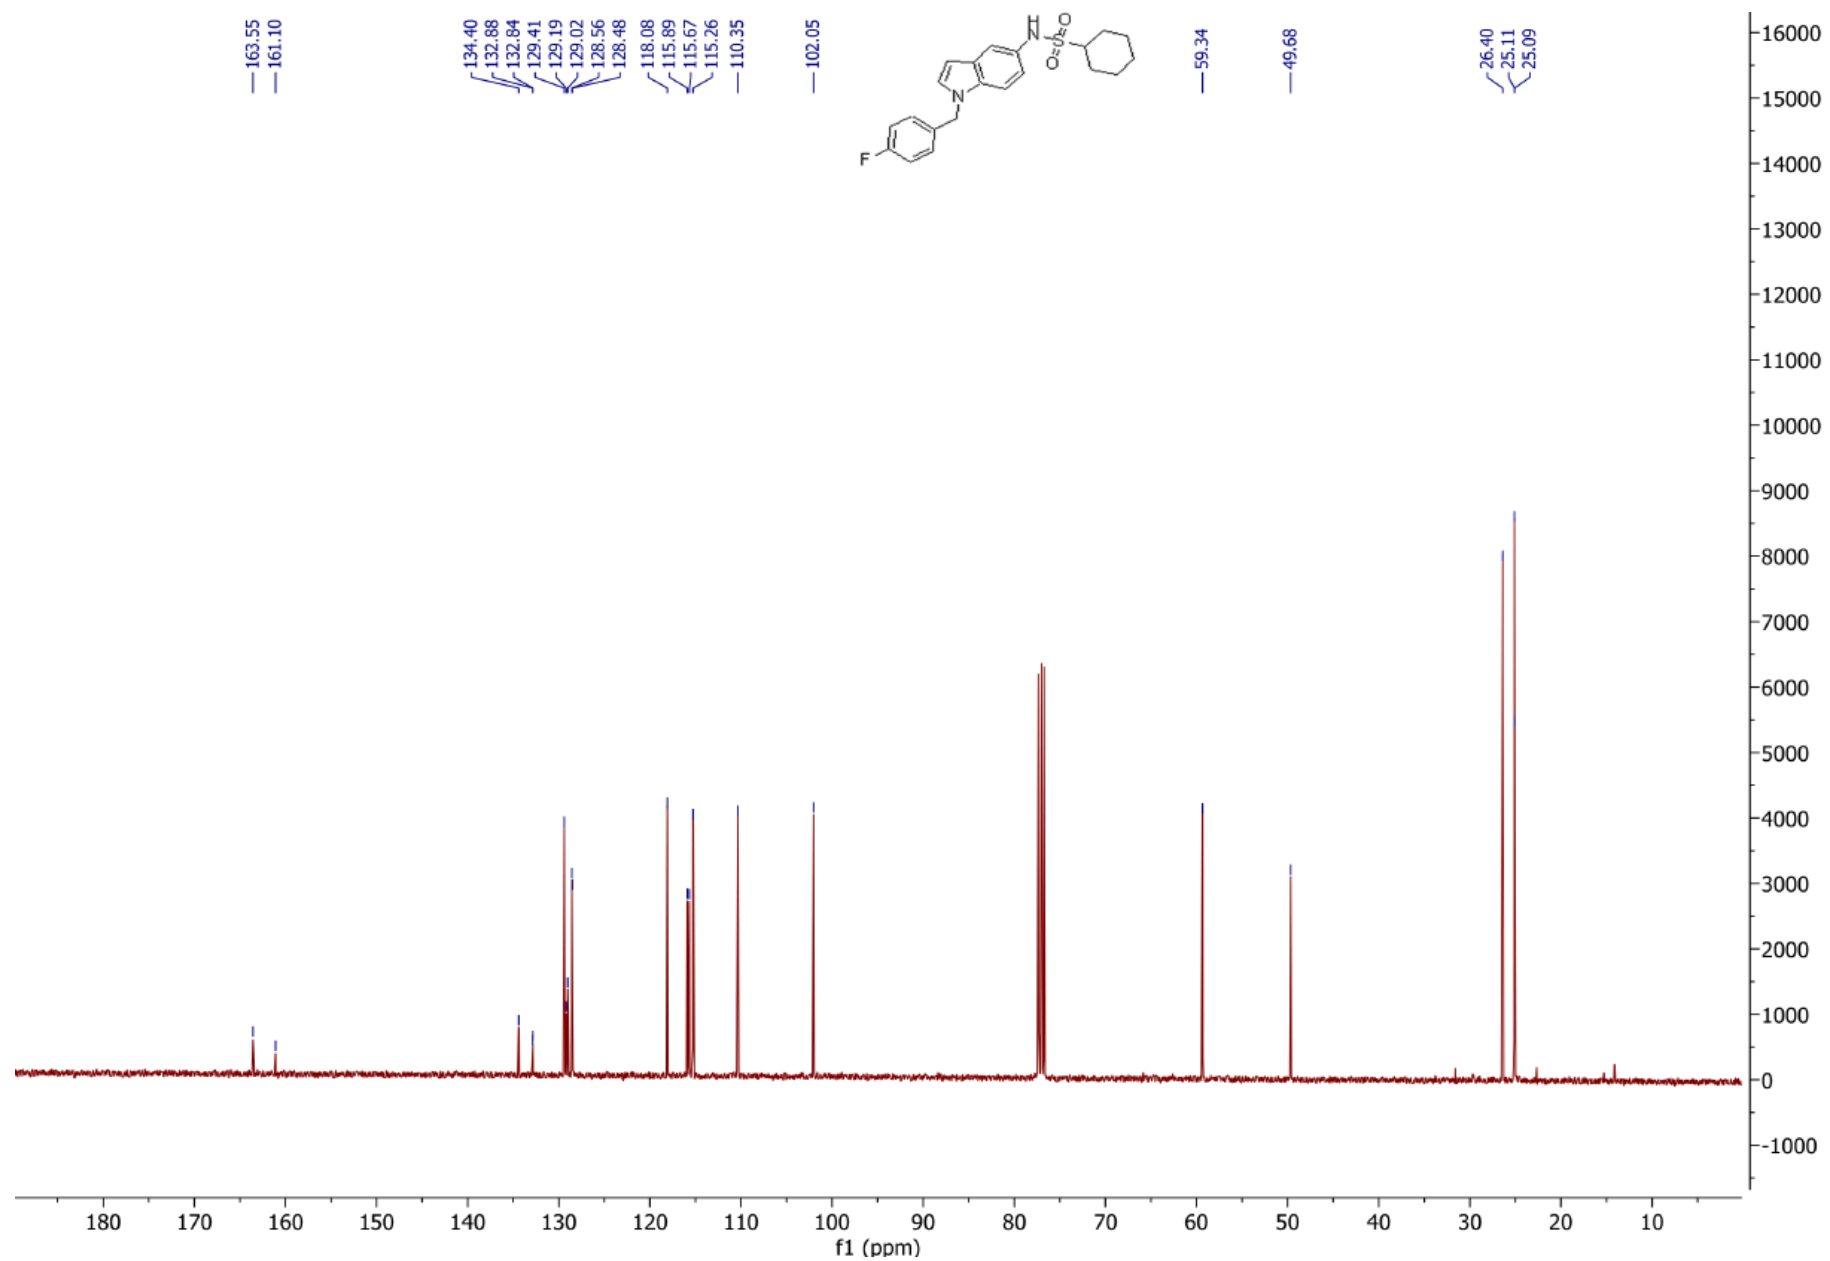

<sup>13</sup>C NMR of compound **23c**

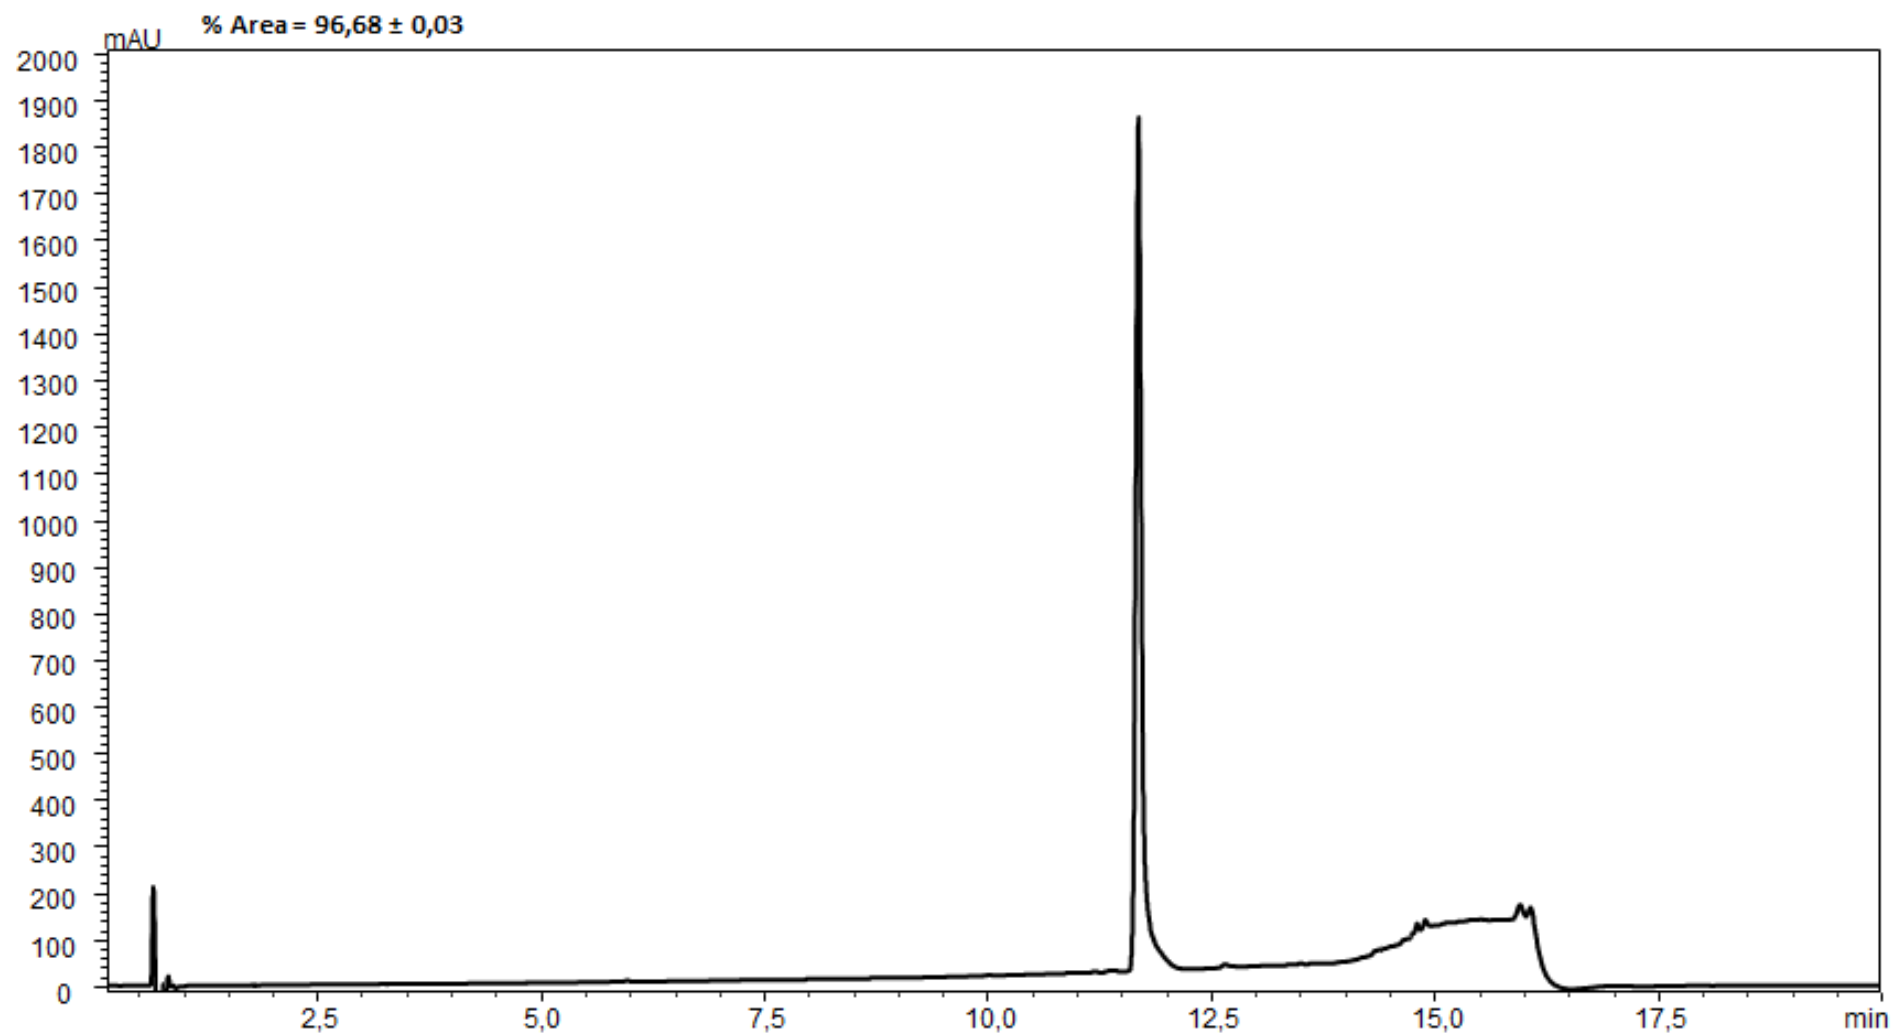

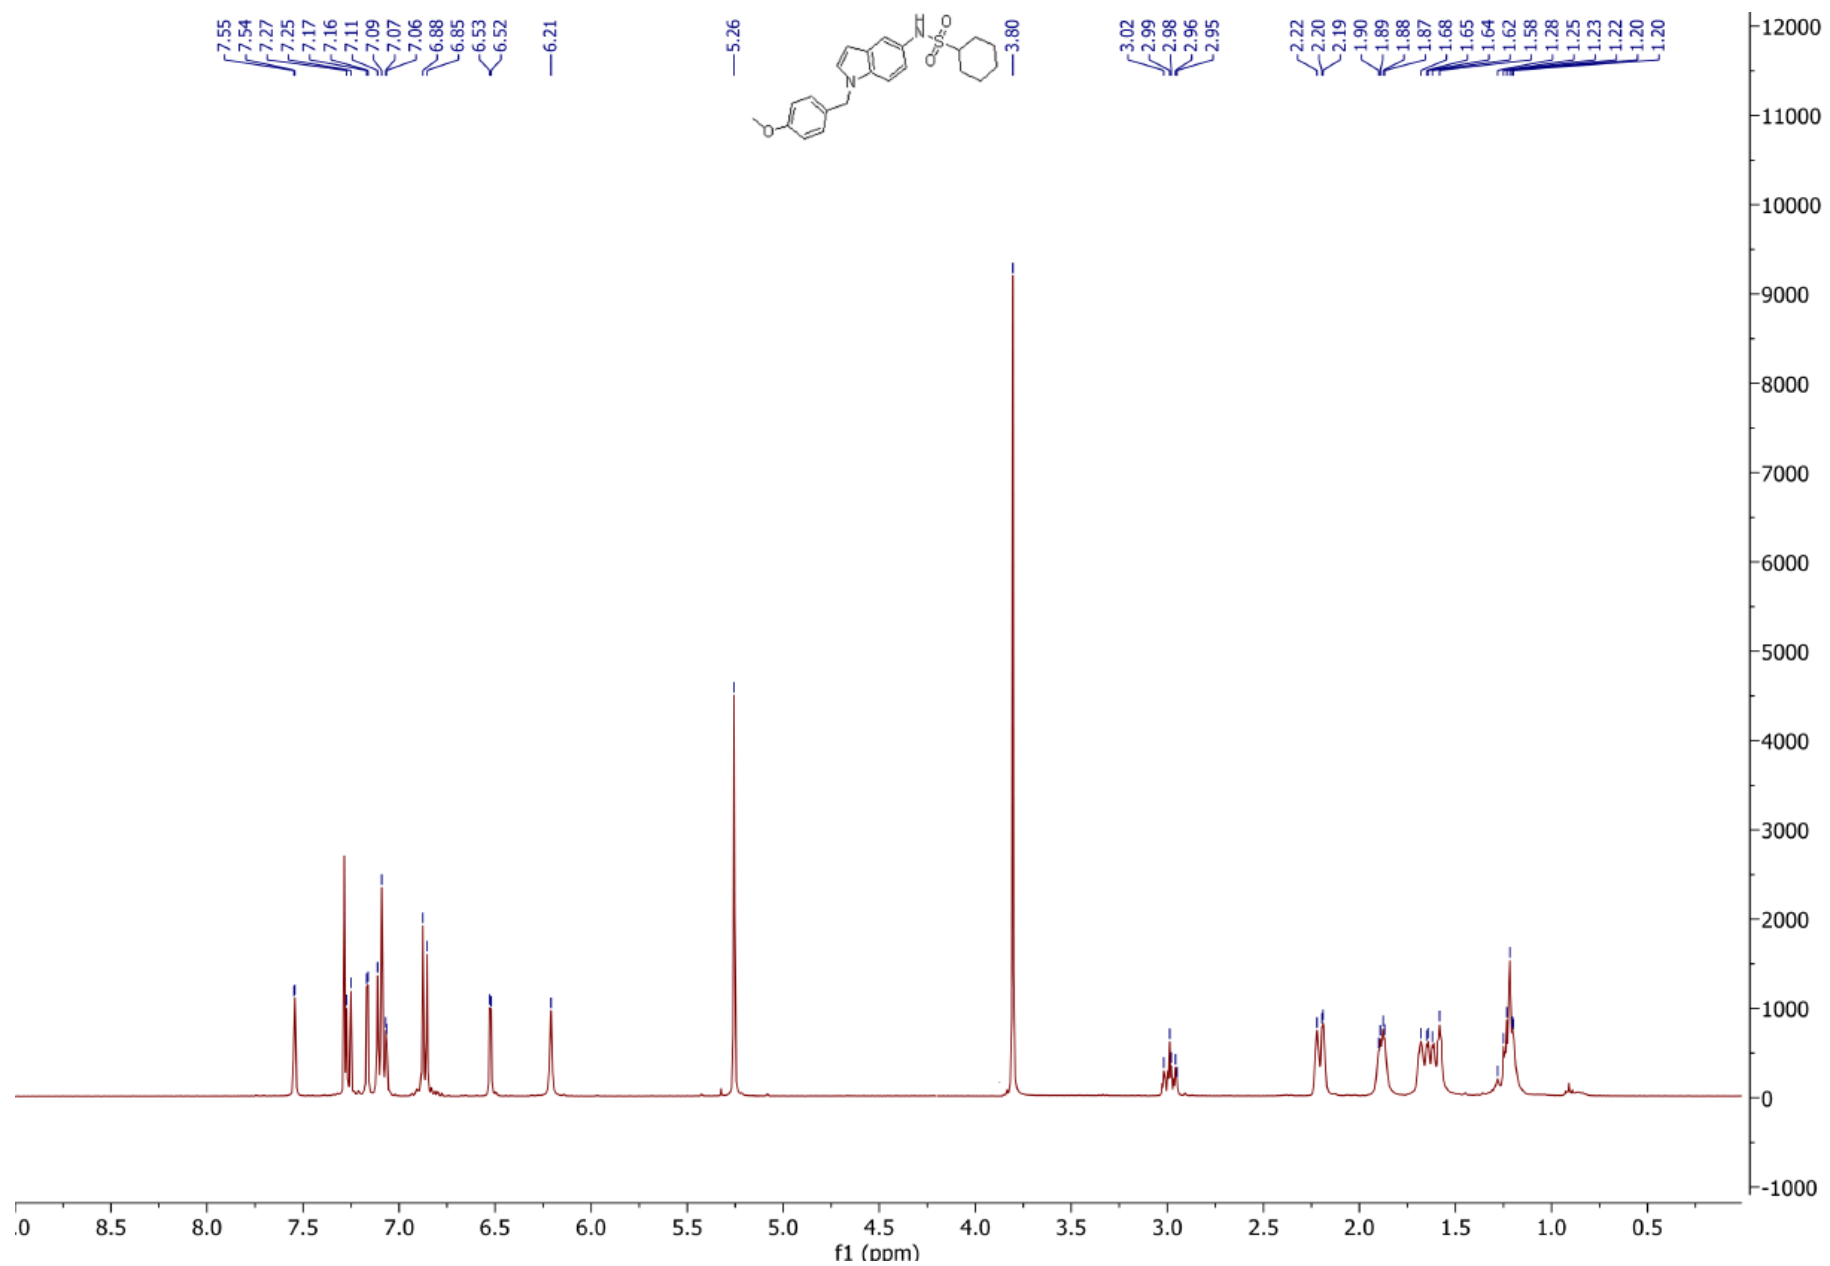

<sup>1</sup>H NMR of compound **23d**

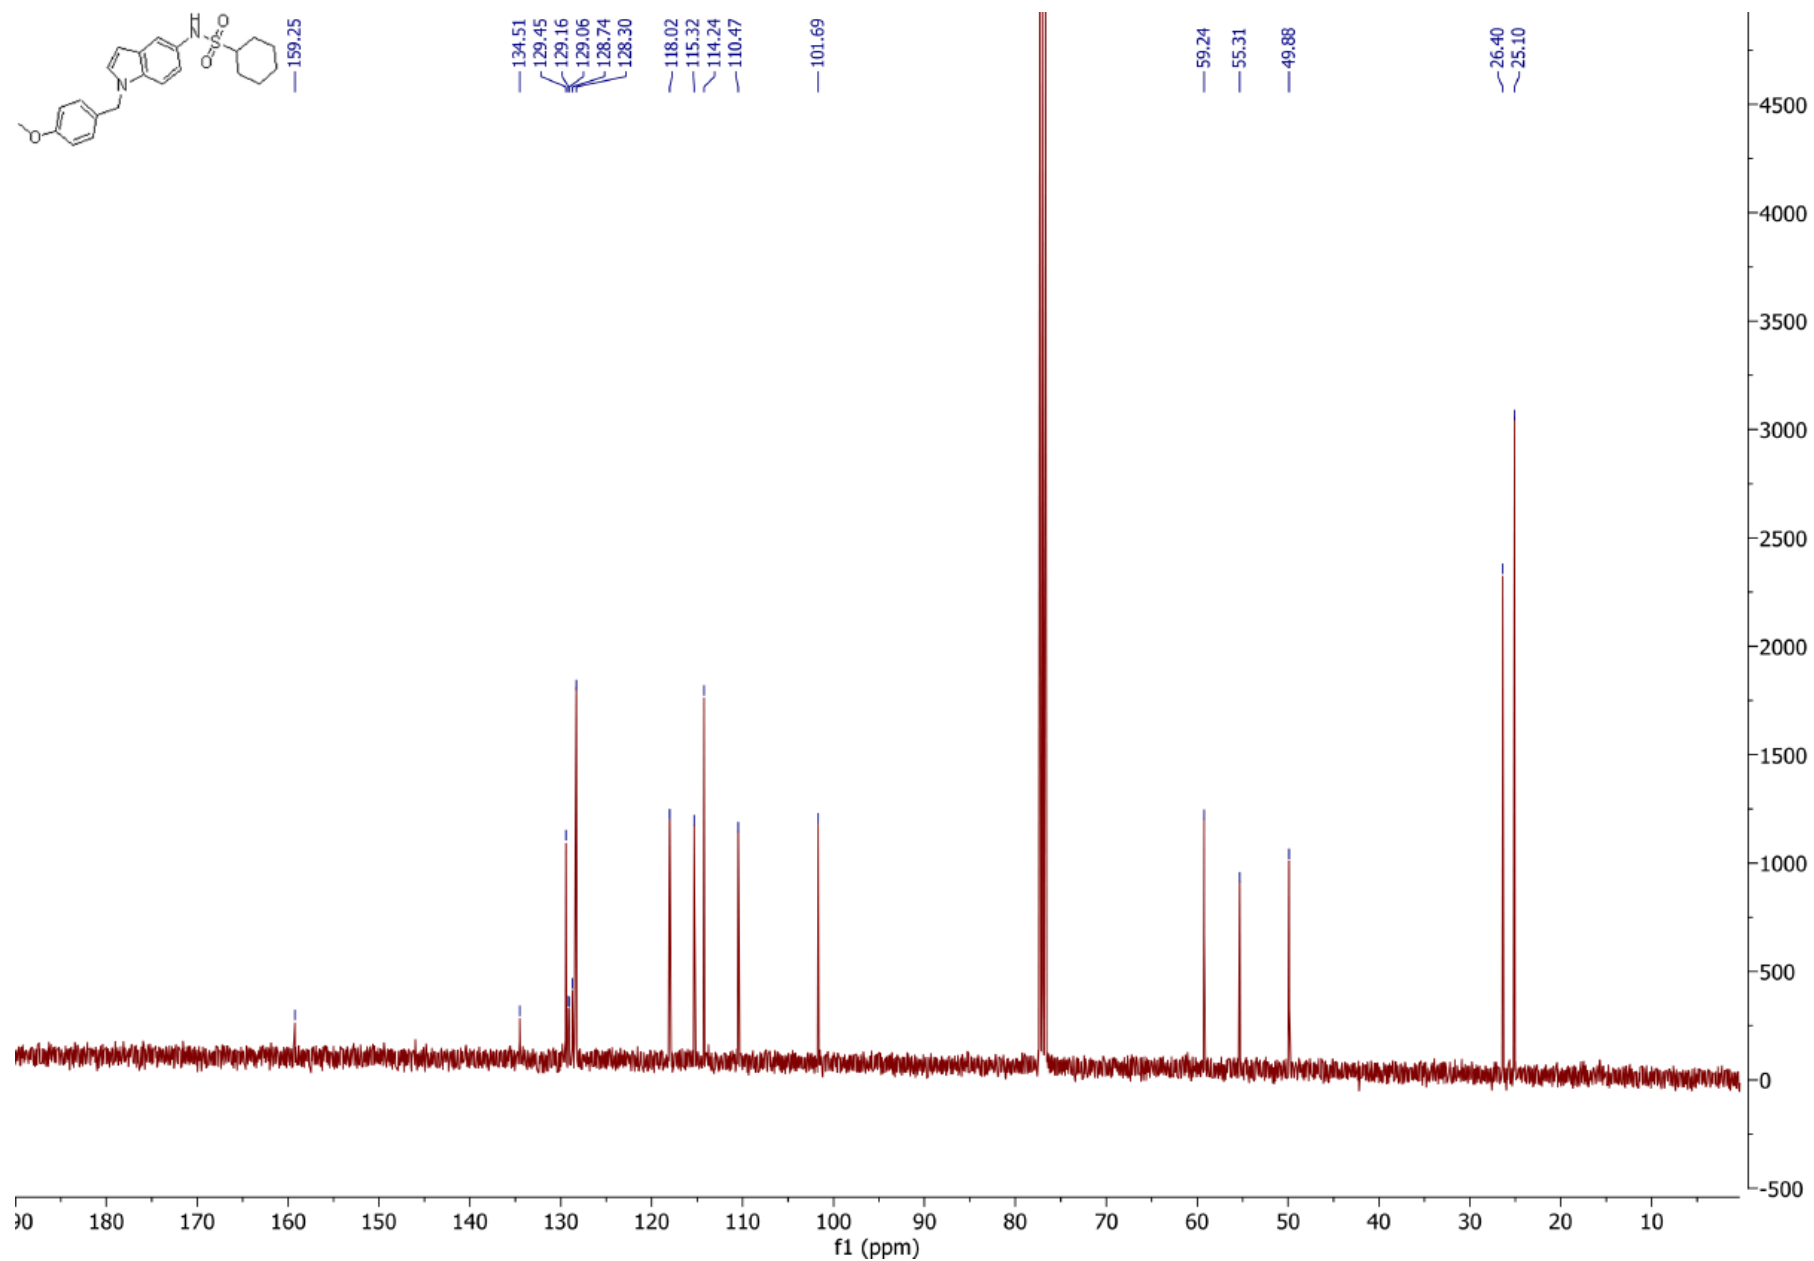

$^{13}\text{C}$  NMR of compound **23d**

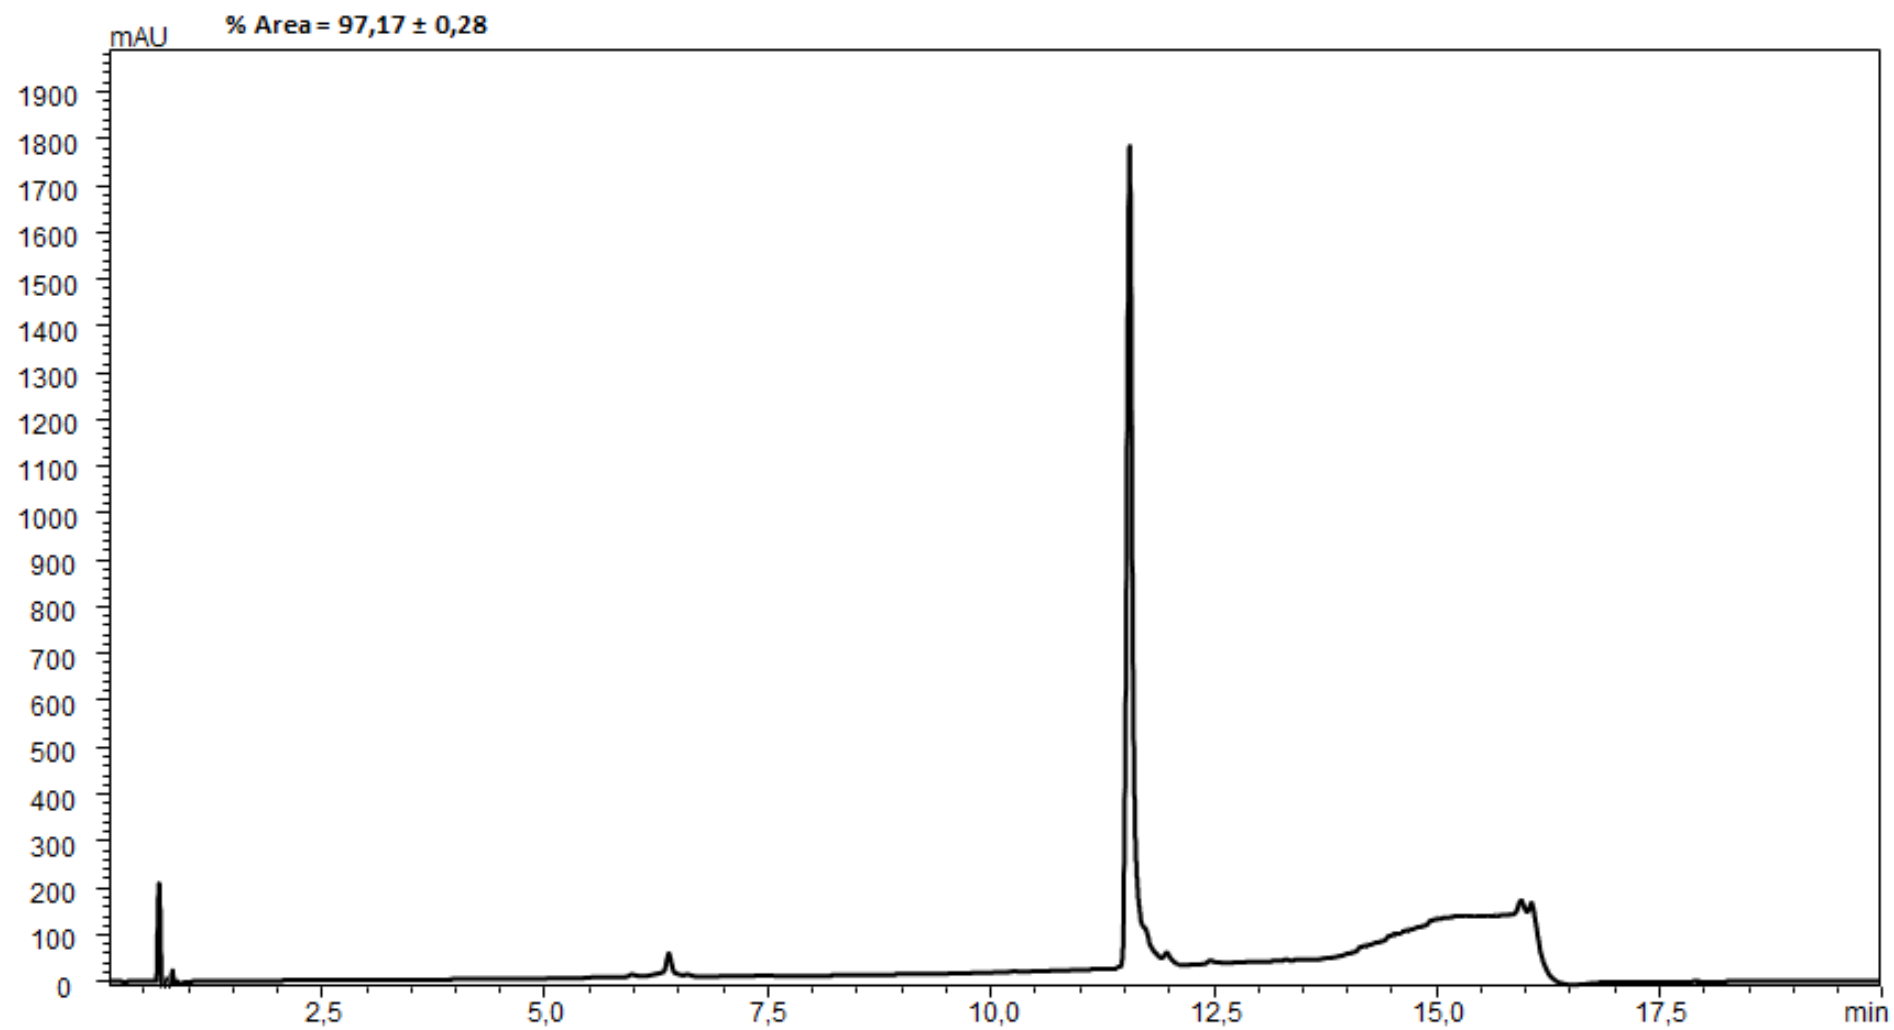

RP-HPLC trace of compound **23d**



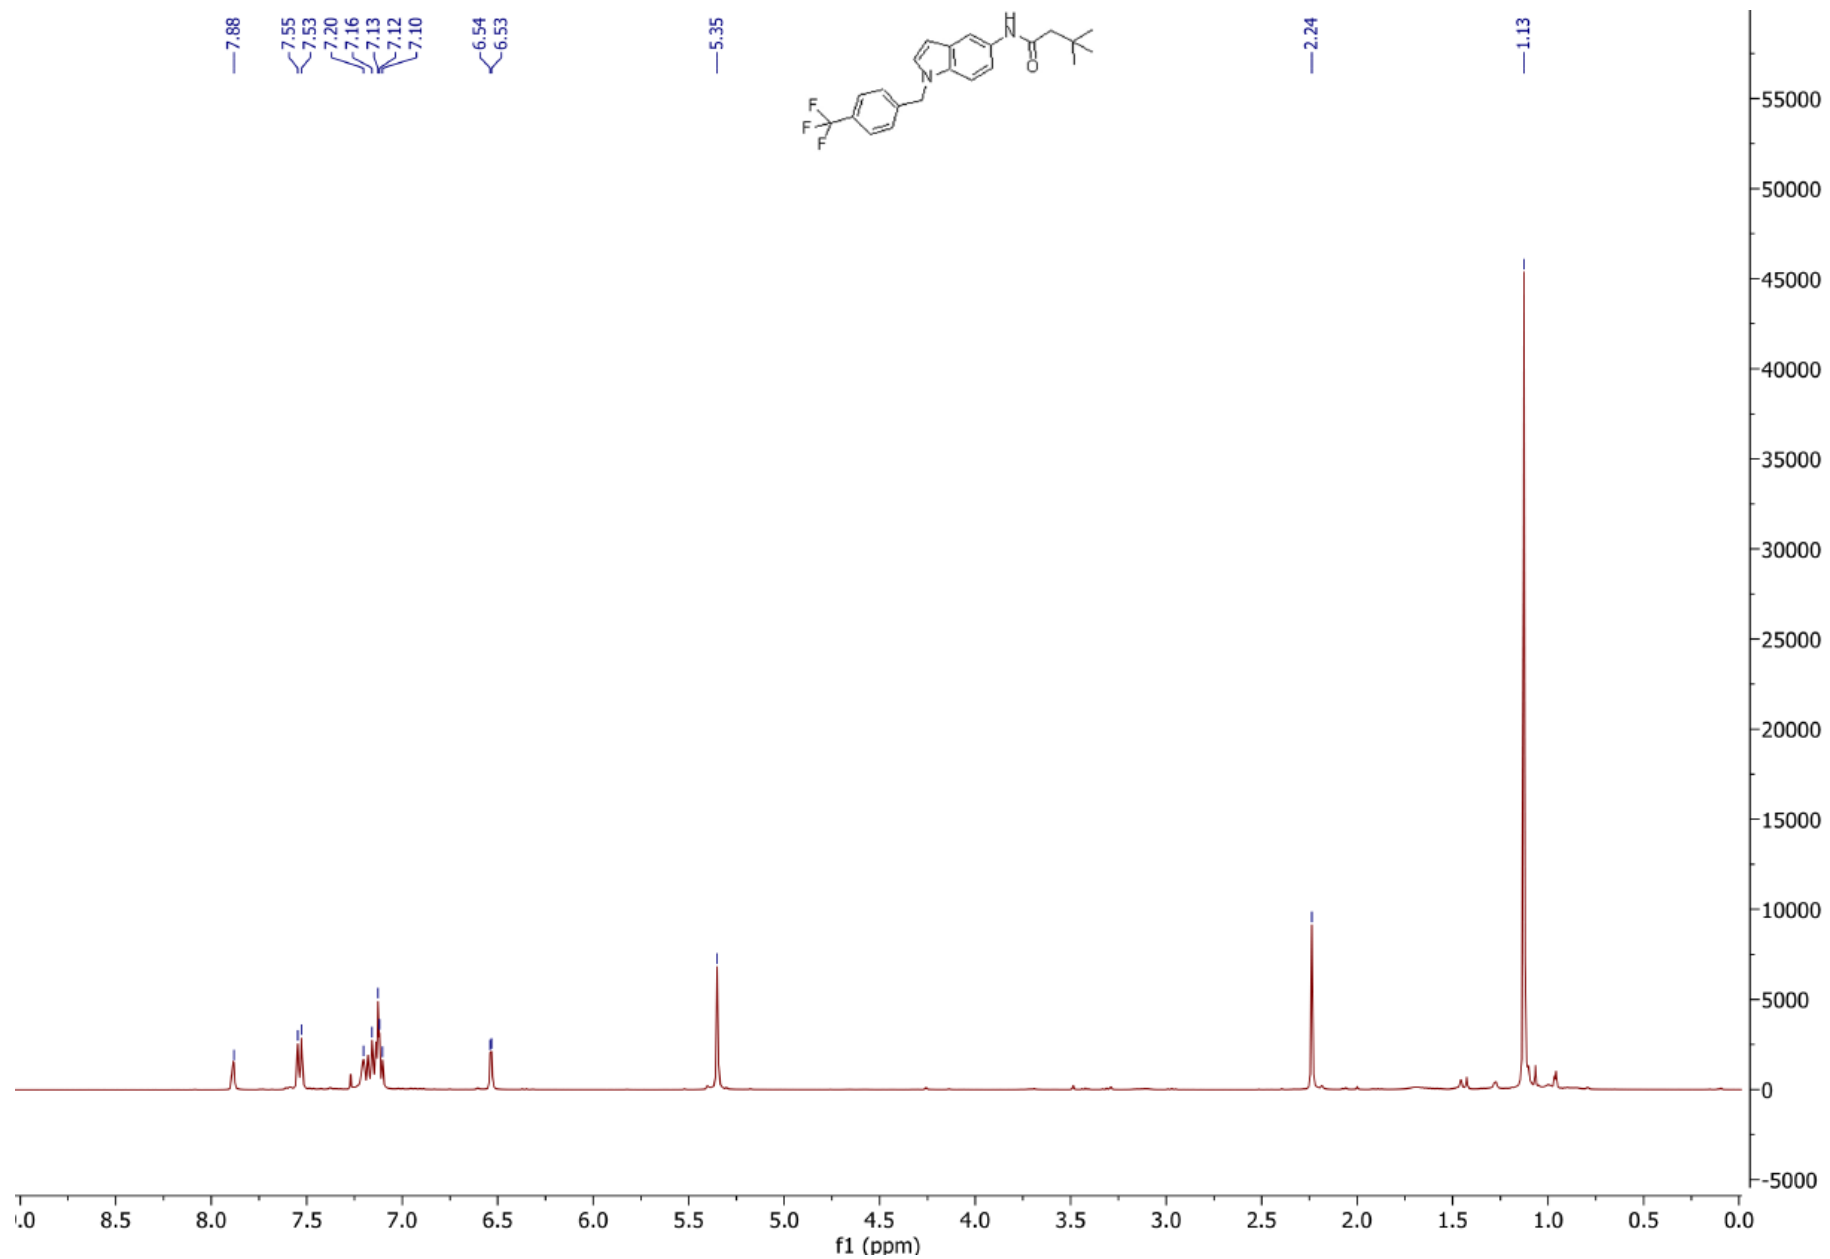

<sup>1</sup>H NMR of compound **24a**

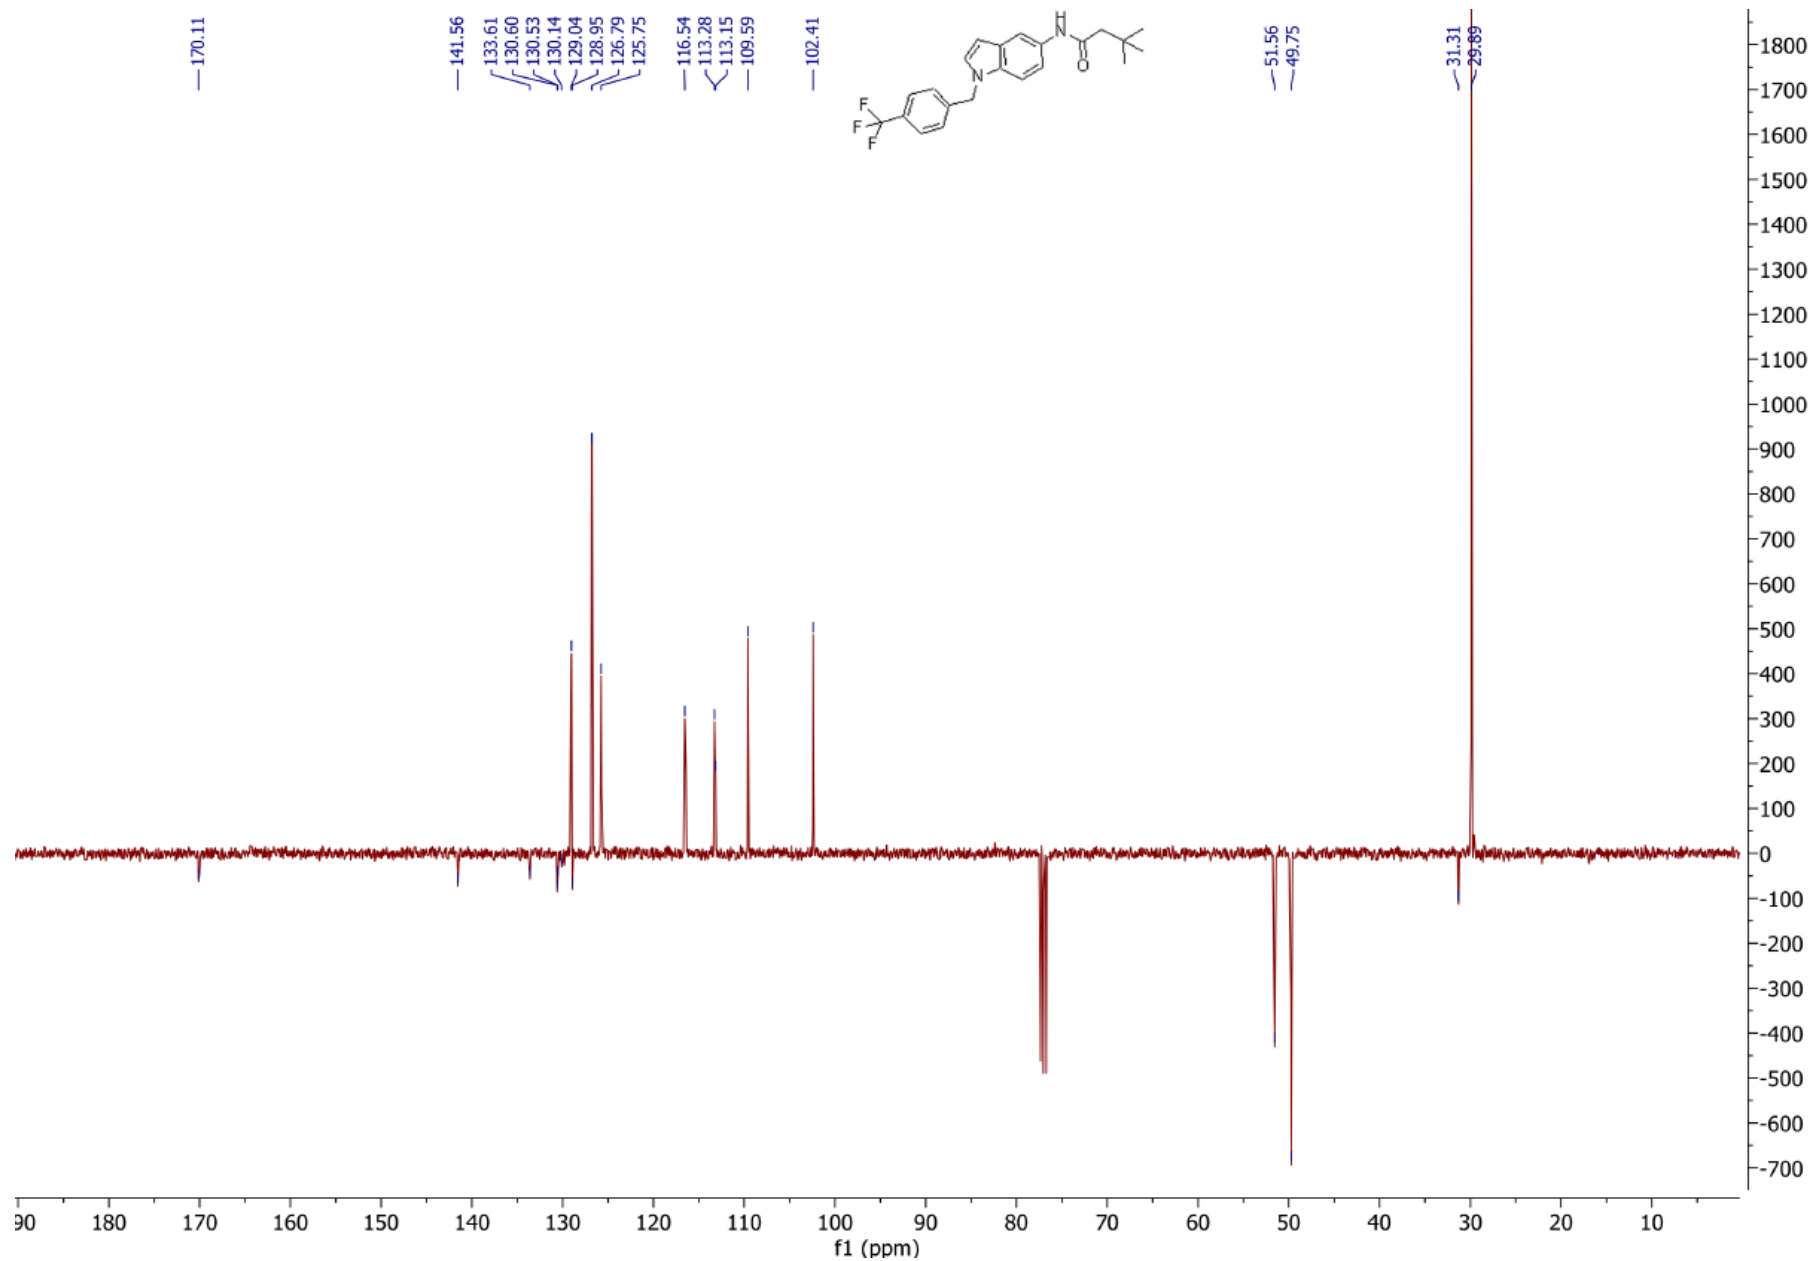

qDEPT NMR of compound **24a**

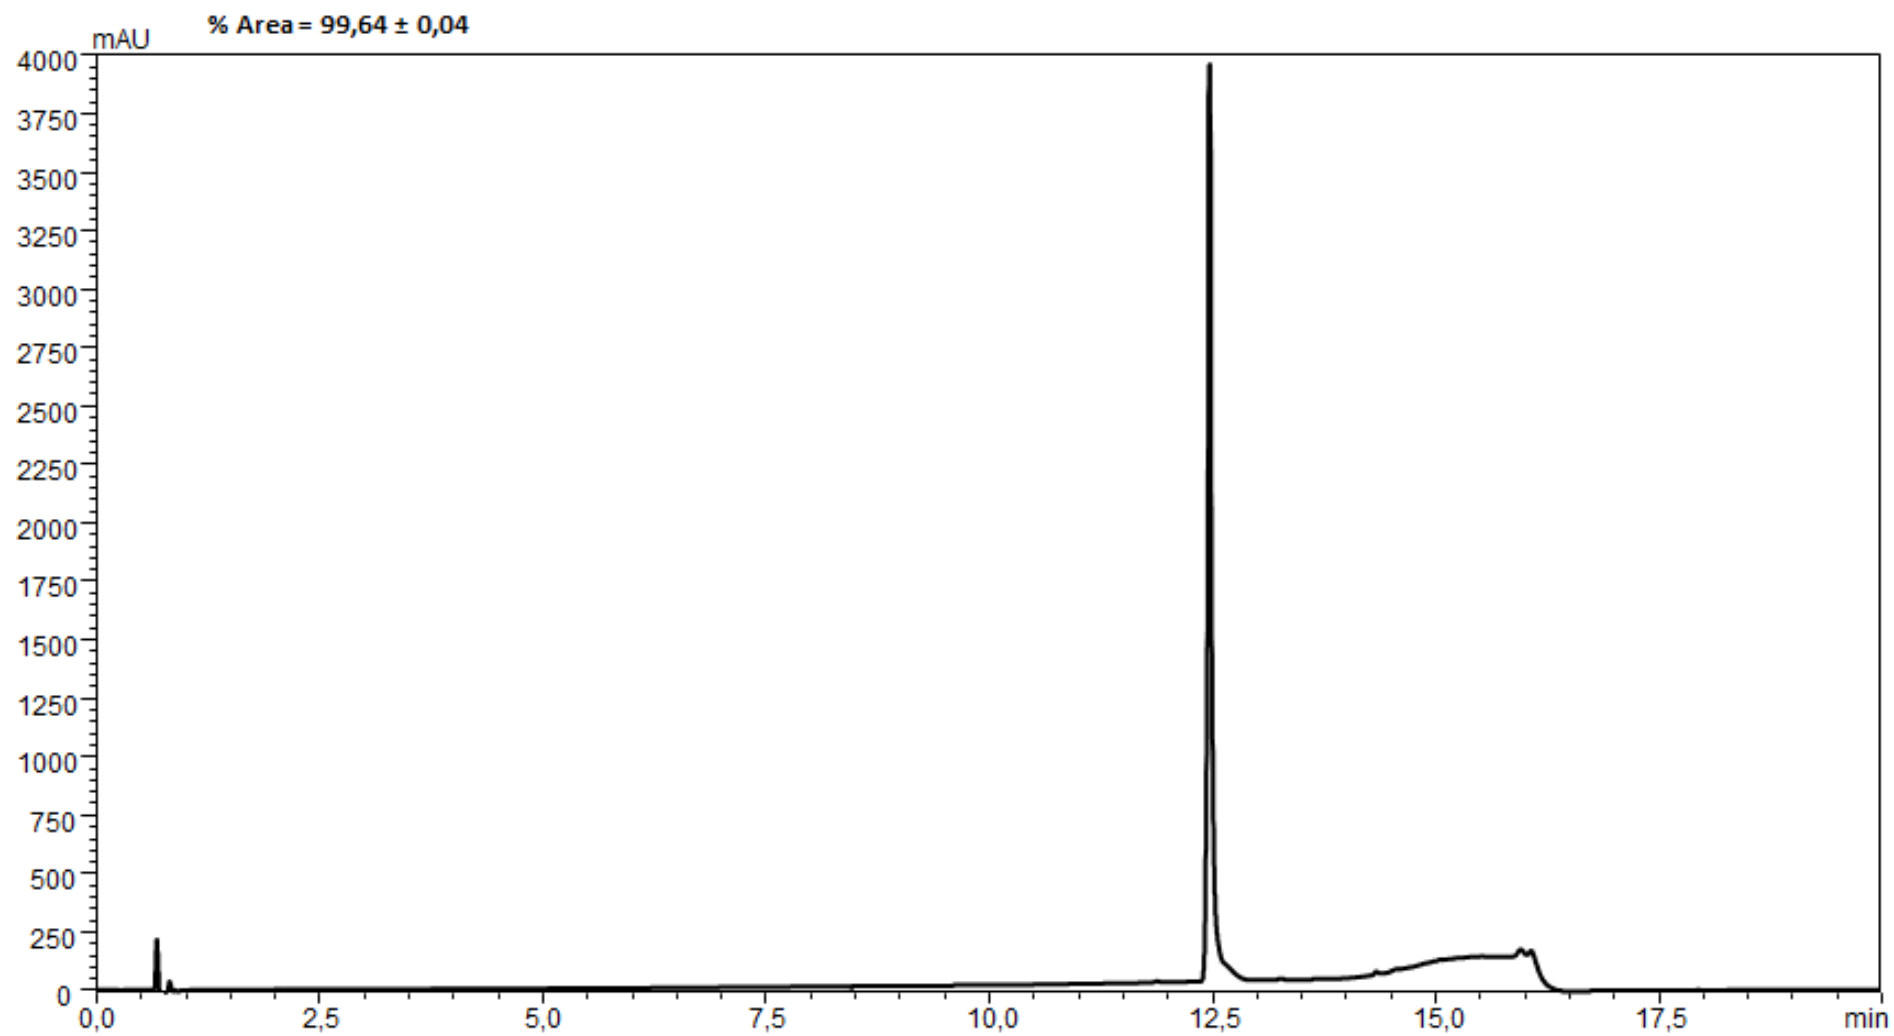

RP-HPLC trace of compound **24a**

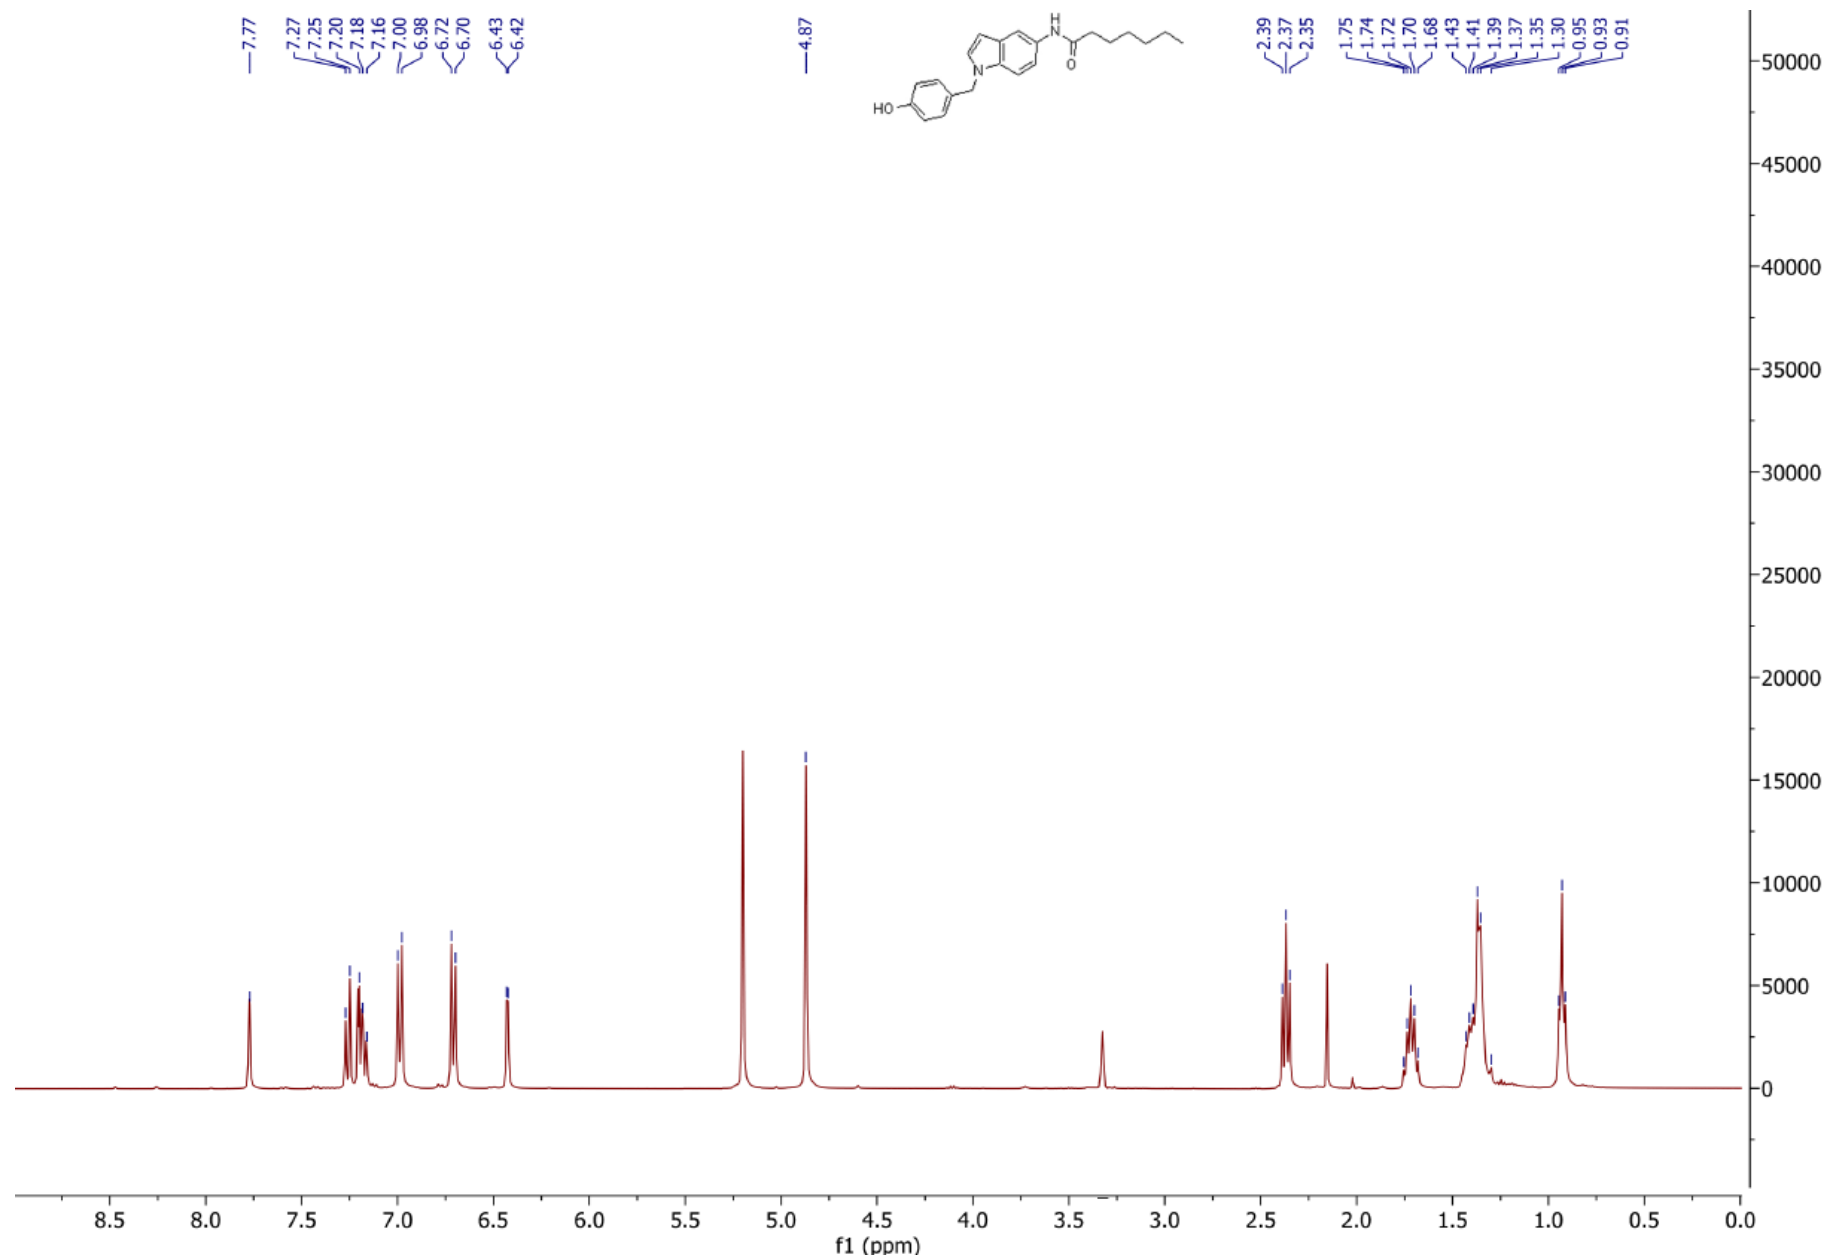

<sup>1</sup>H NMR of compound **24b**

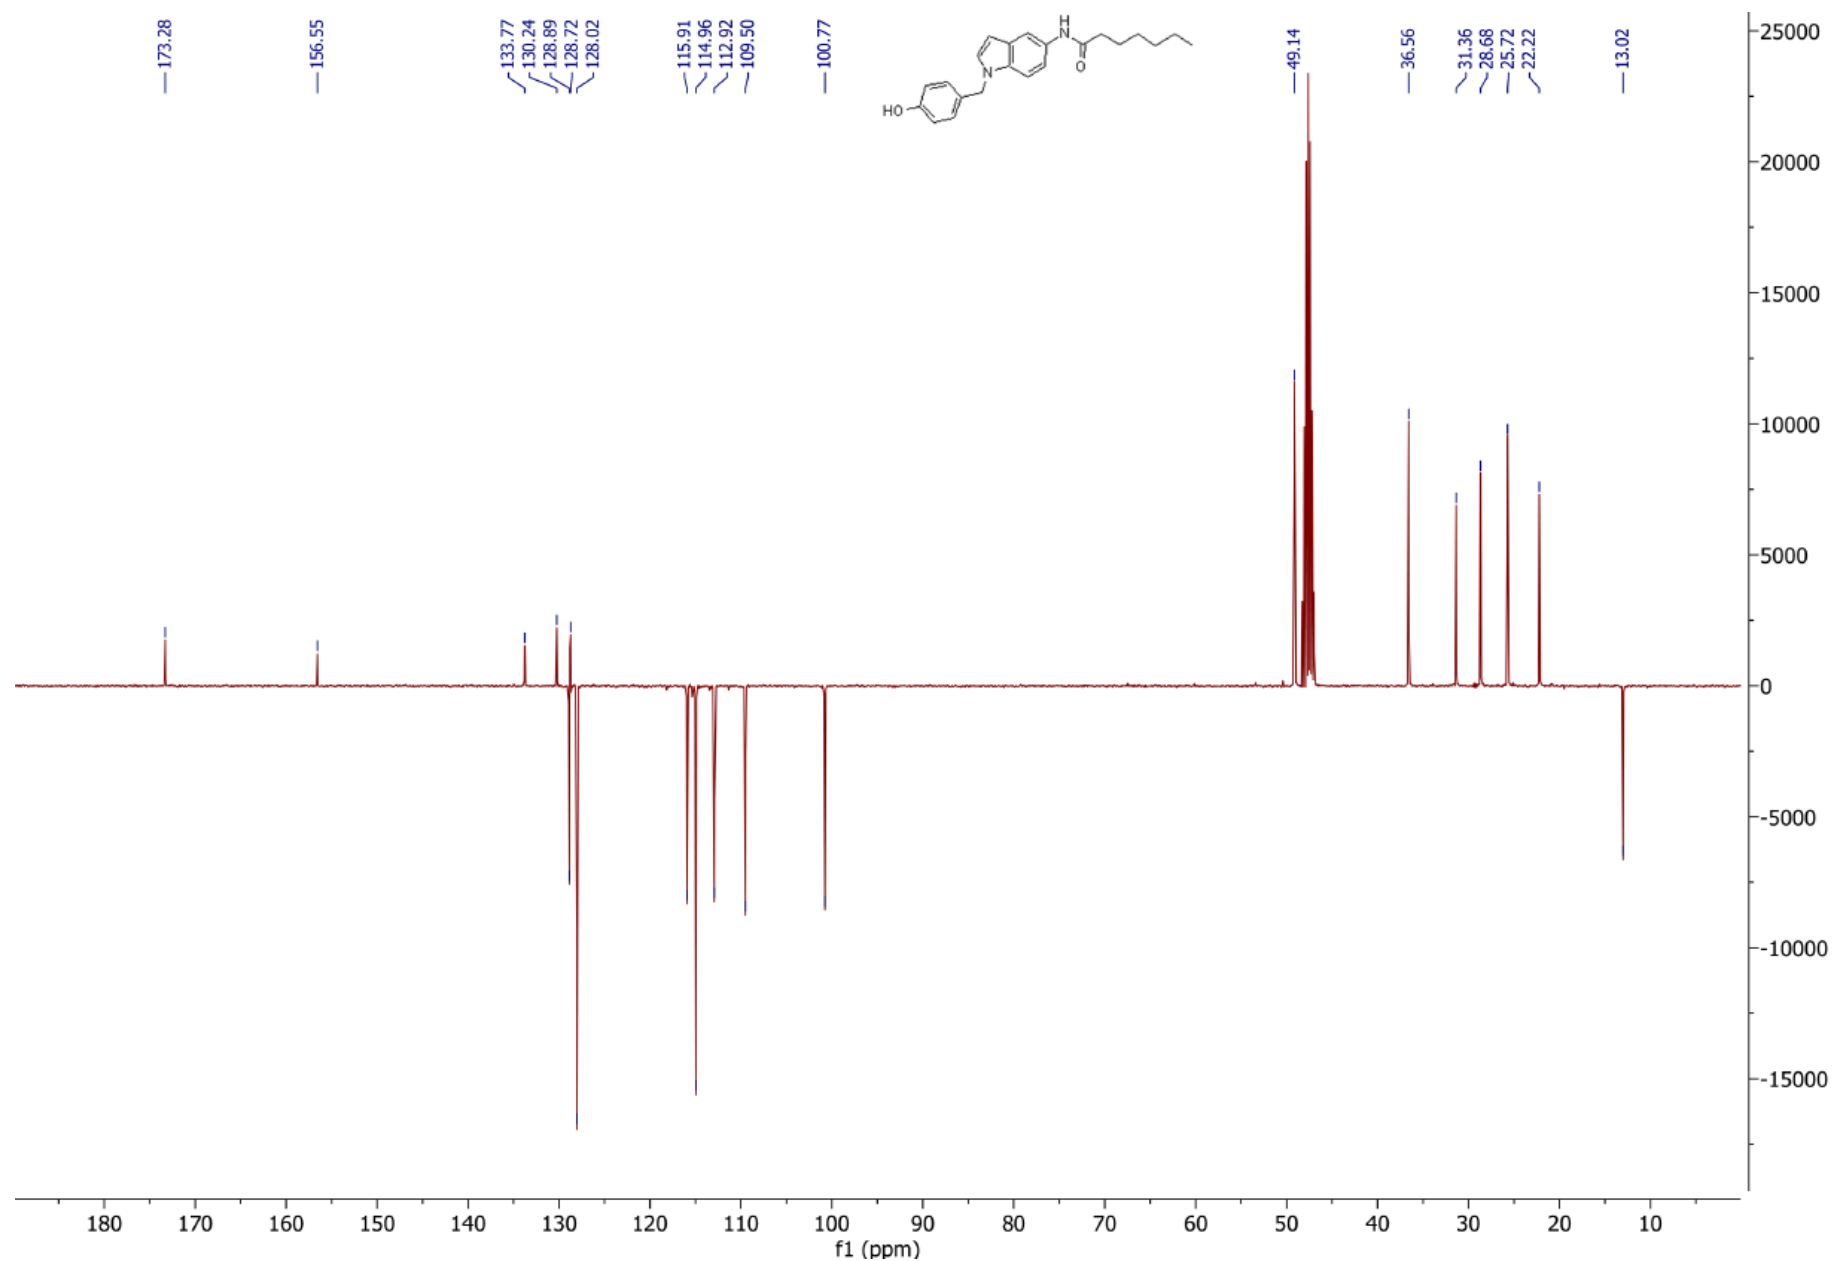

qDEPT NMR of compound **24b**

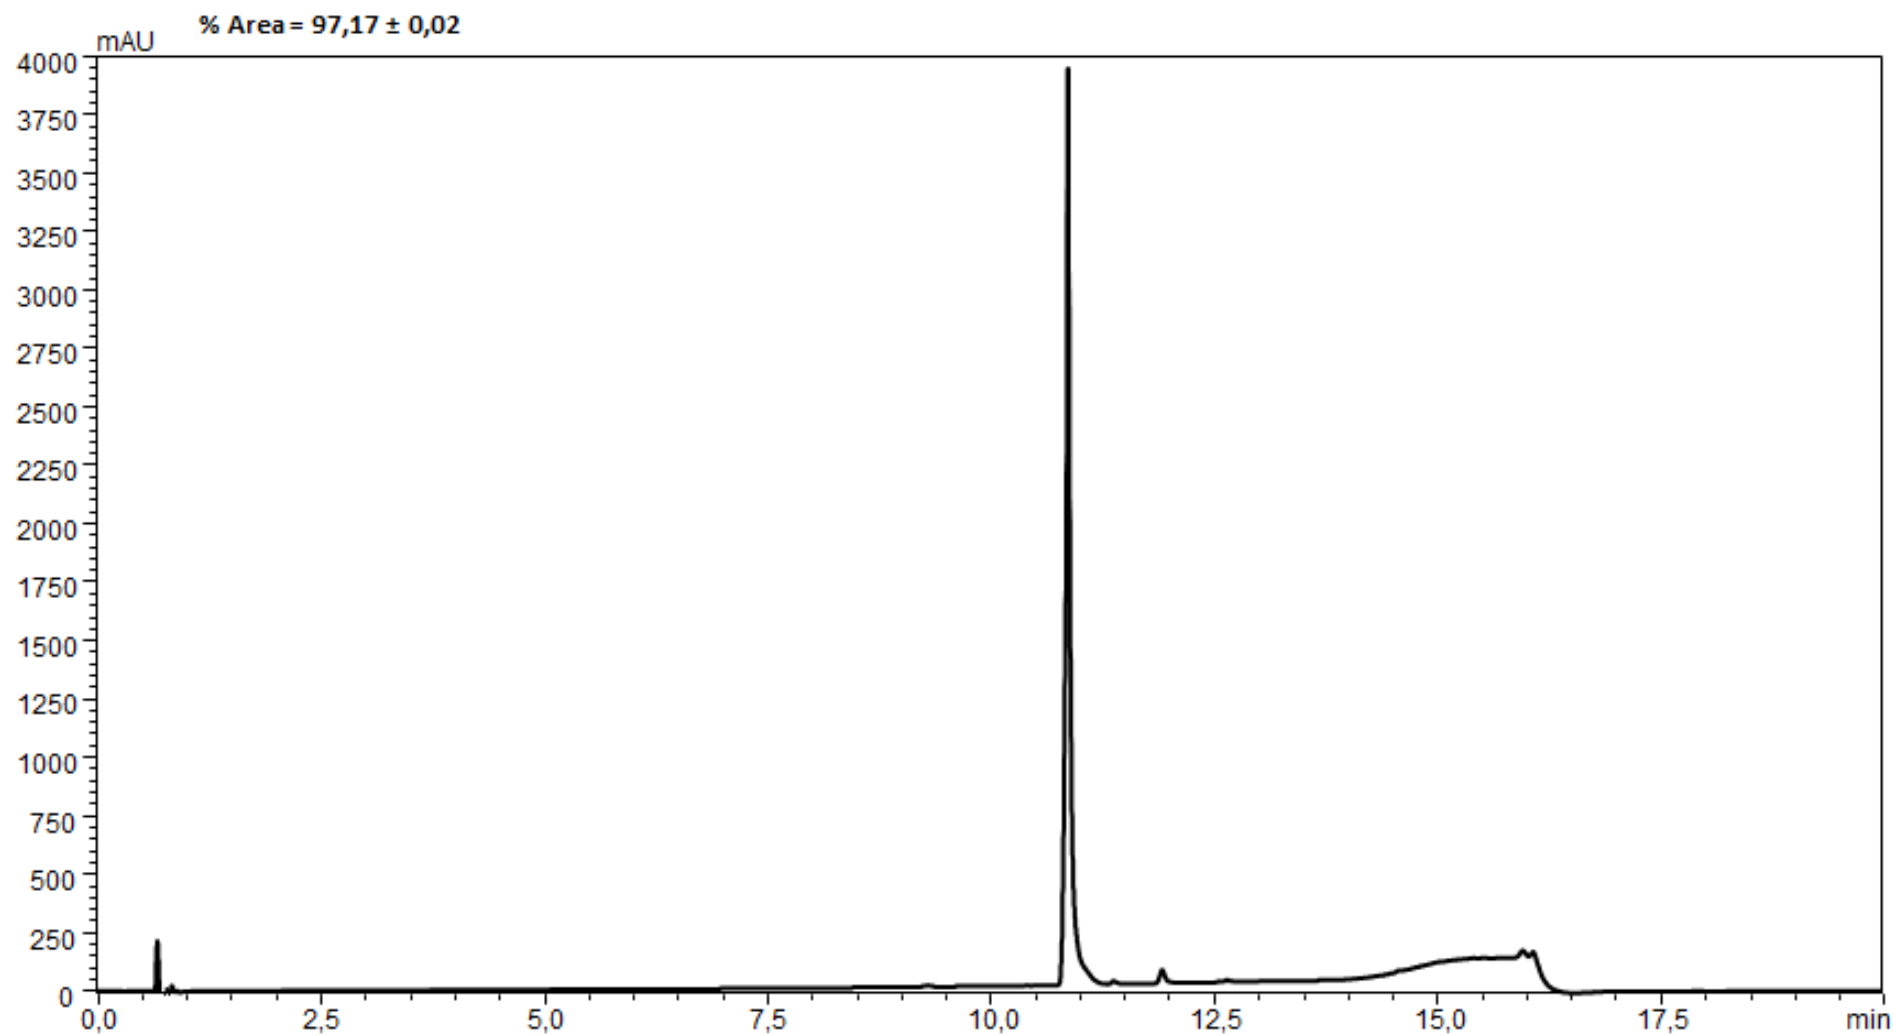

RP-HPLC of compound **24b**

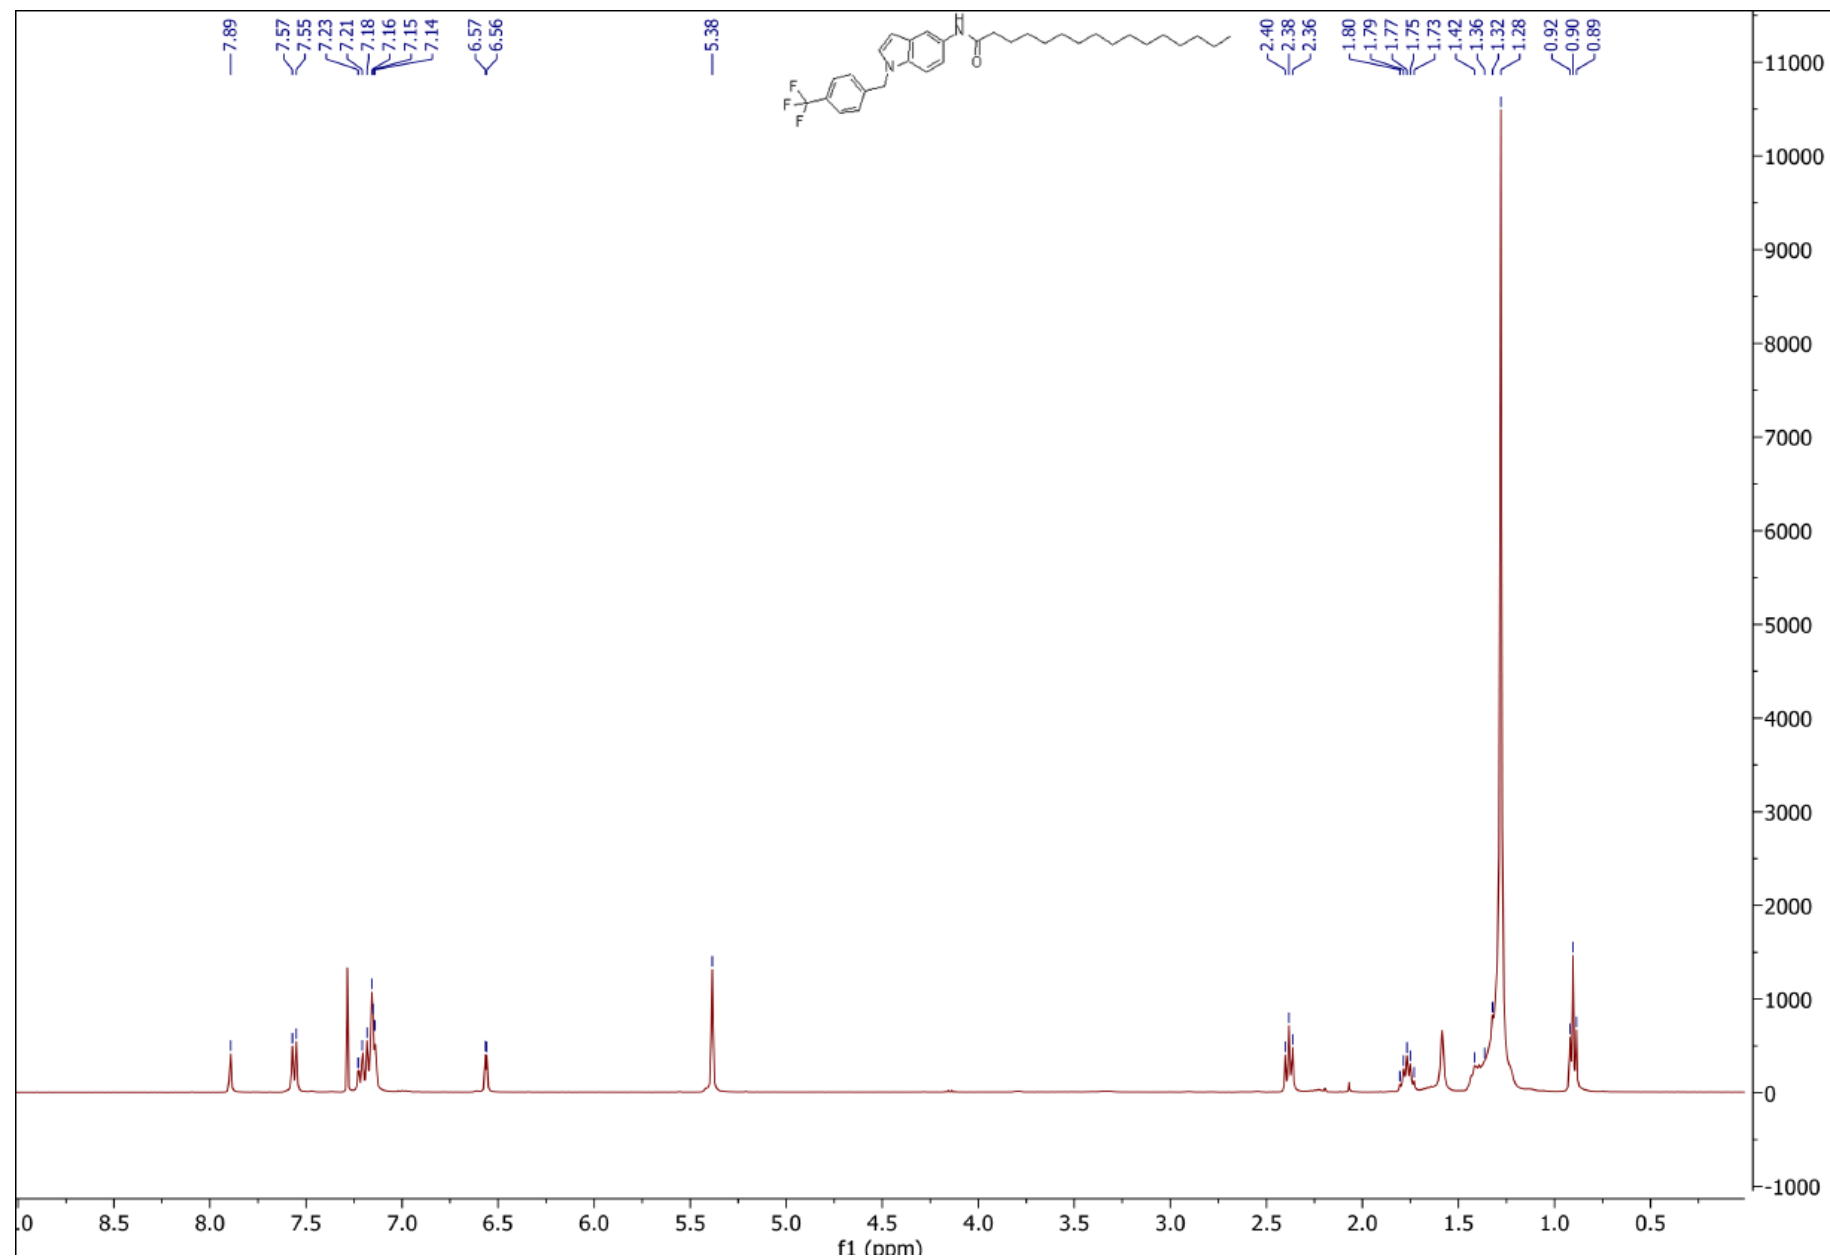

<sup>1</sup>H NMR of compound **25a**

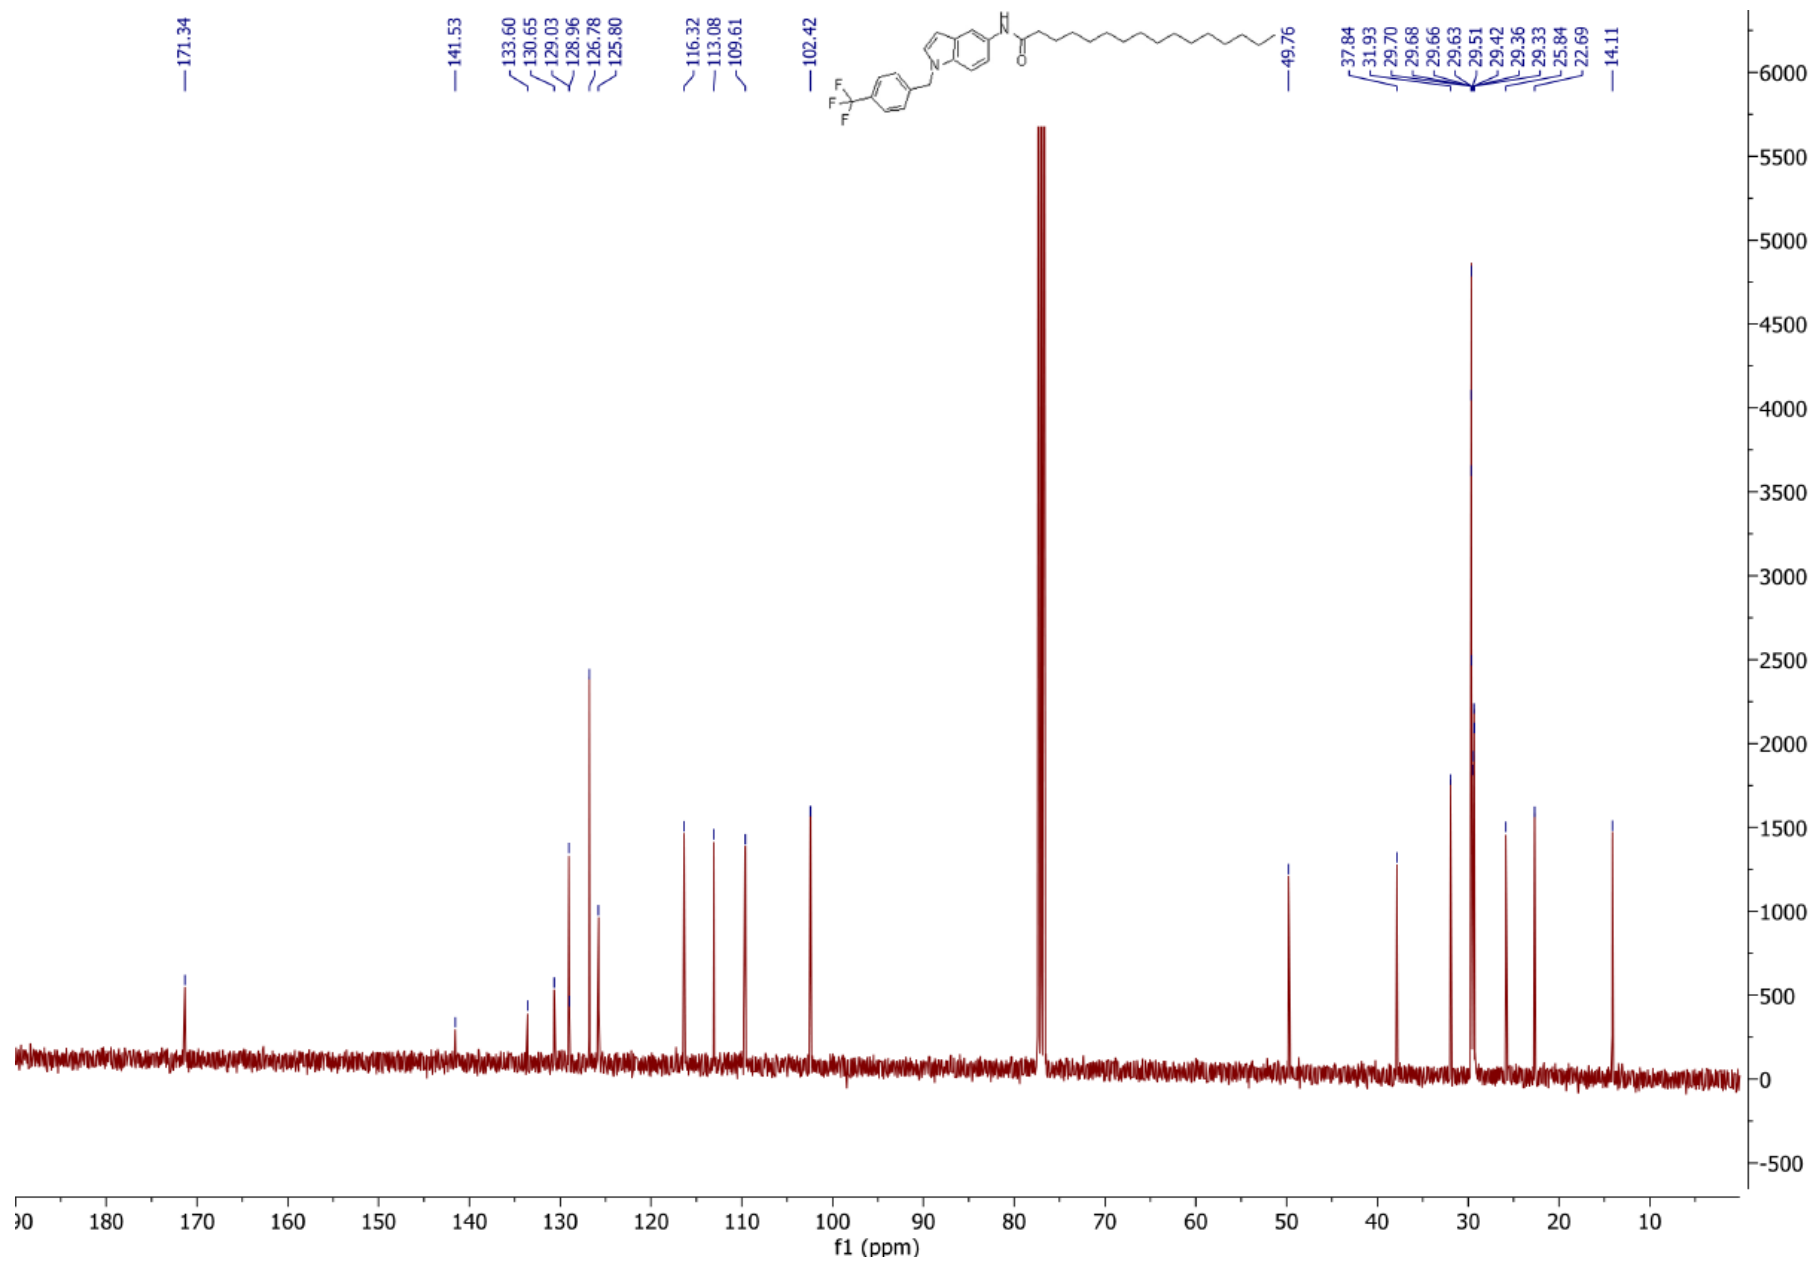

<sup>13</sup>C NMR of compound **25a**



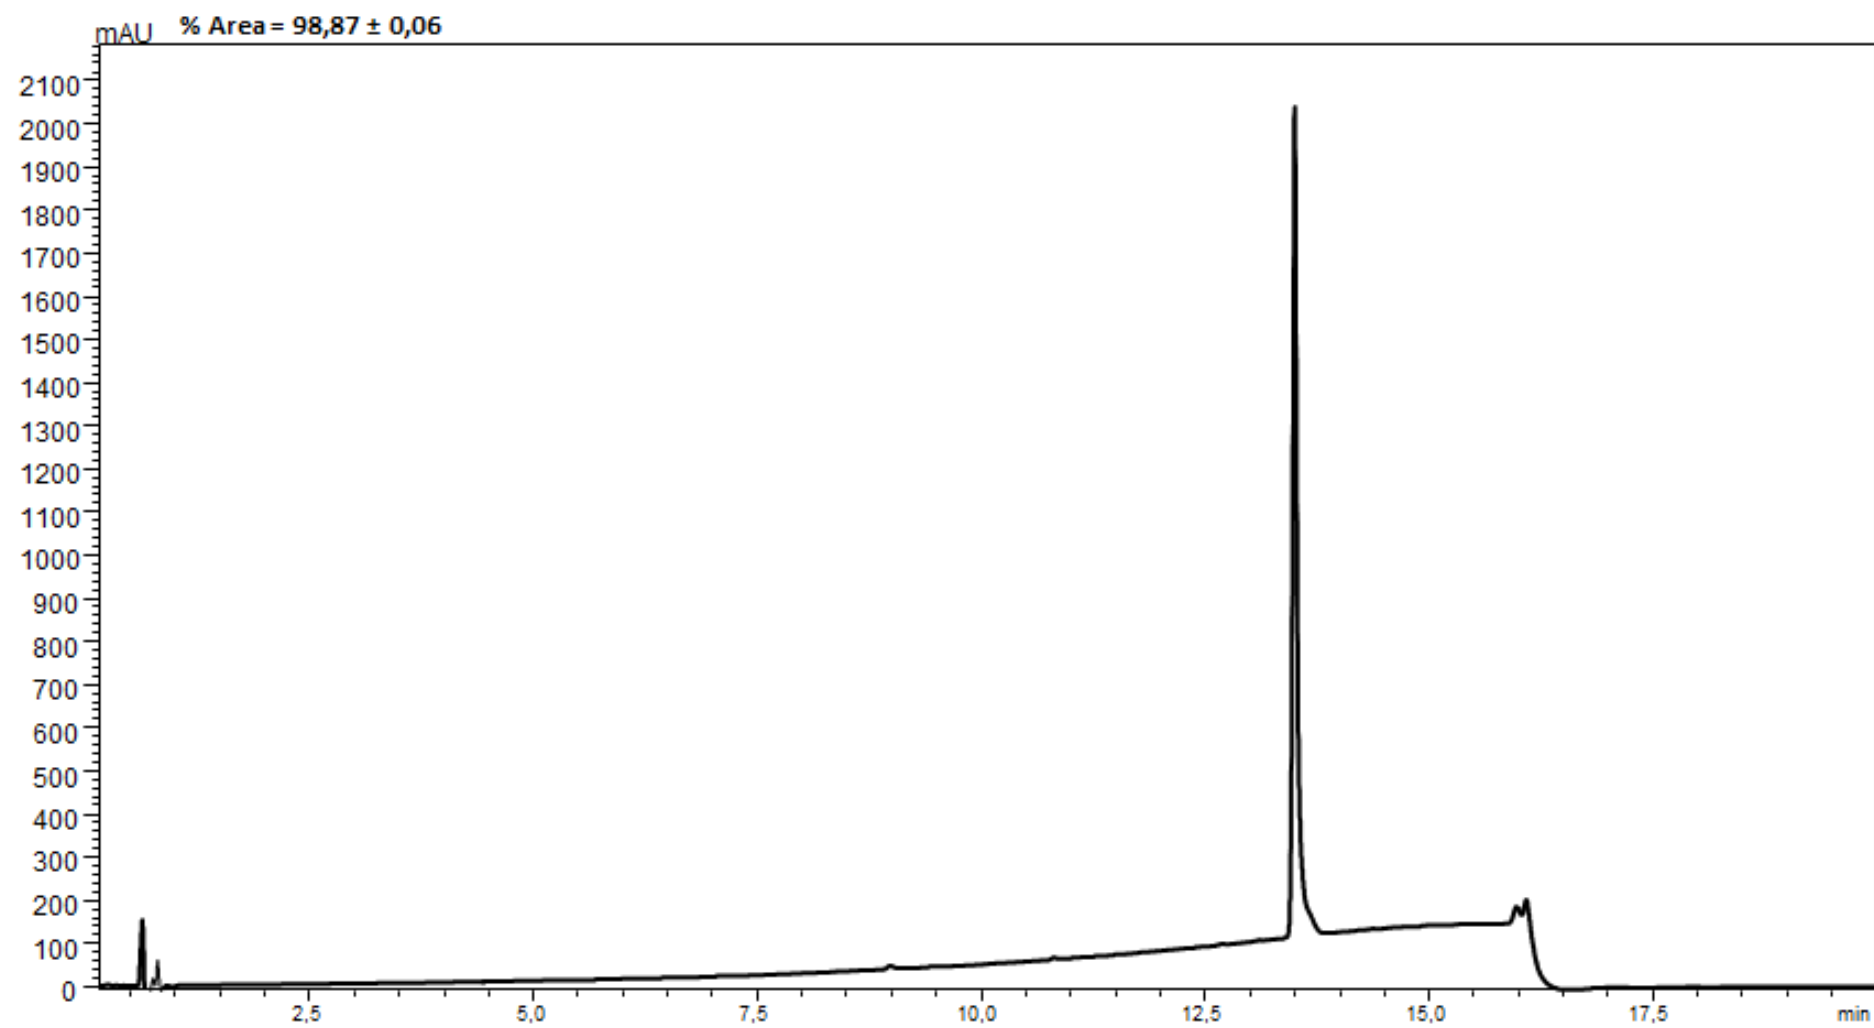

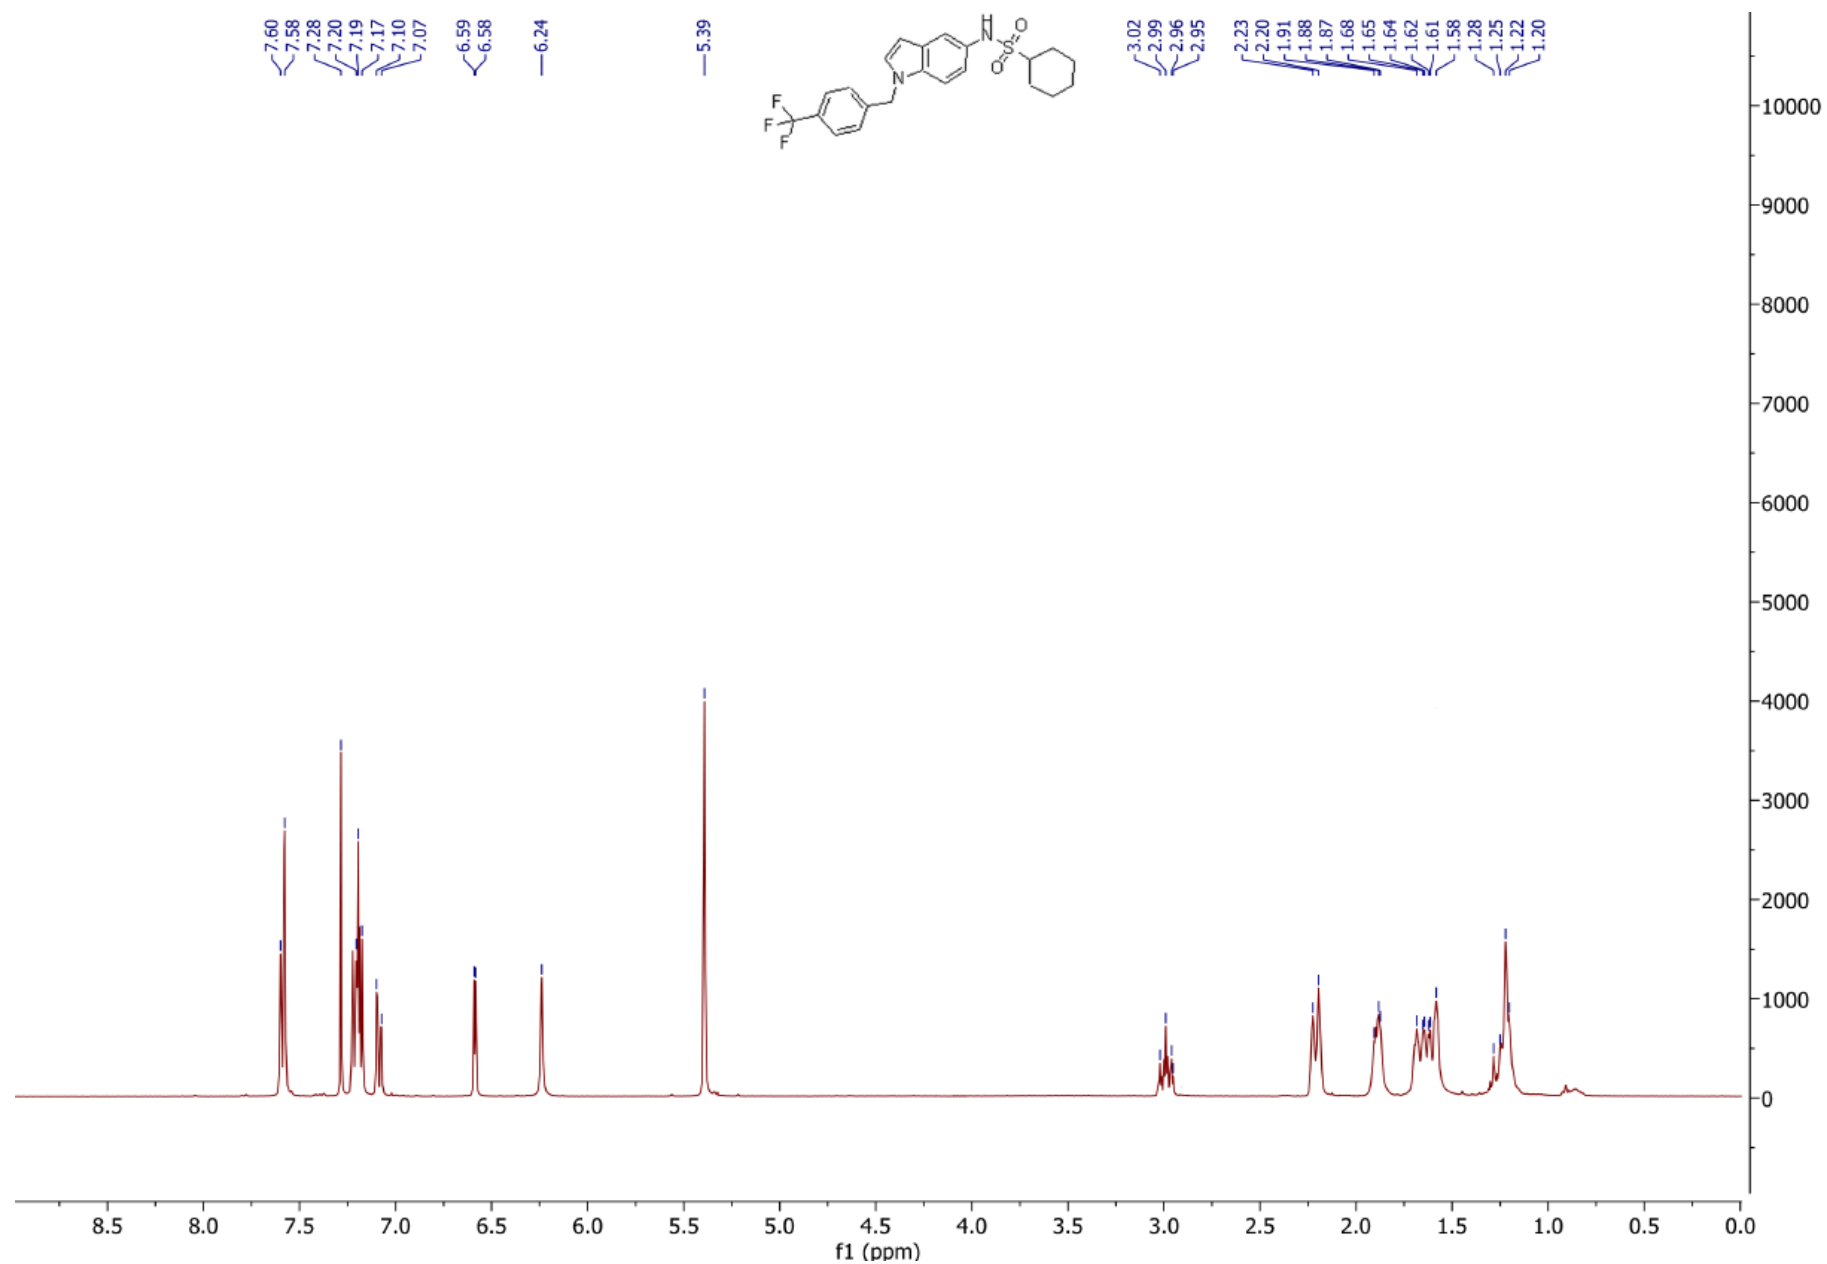

<sup>1</sup>H NMR of compound **26a**

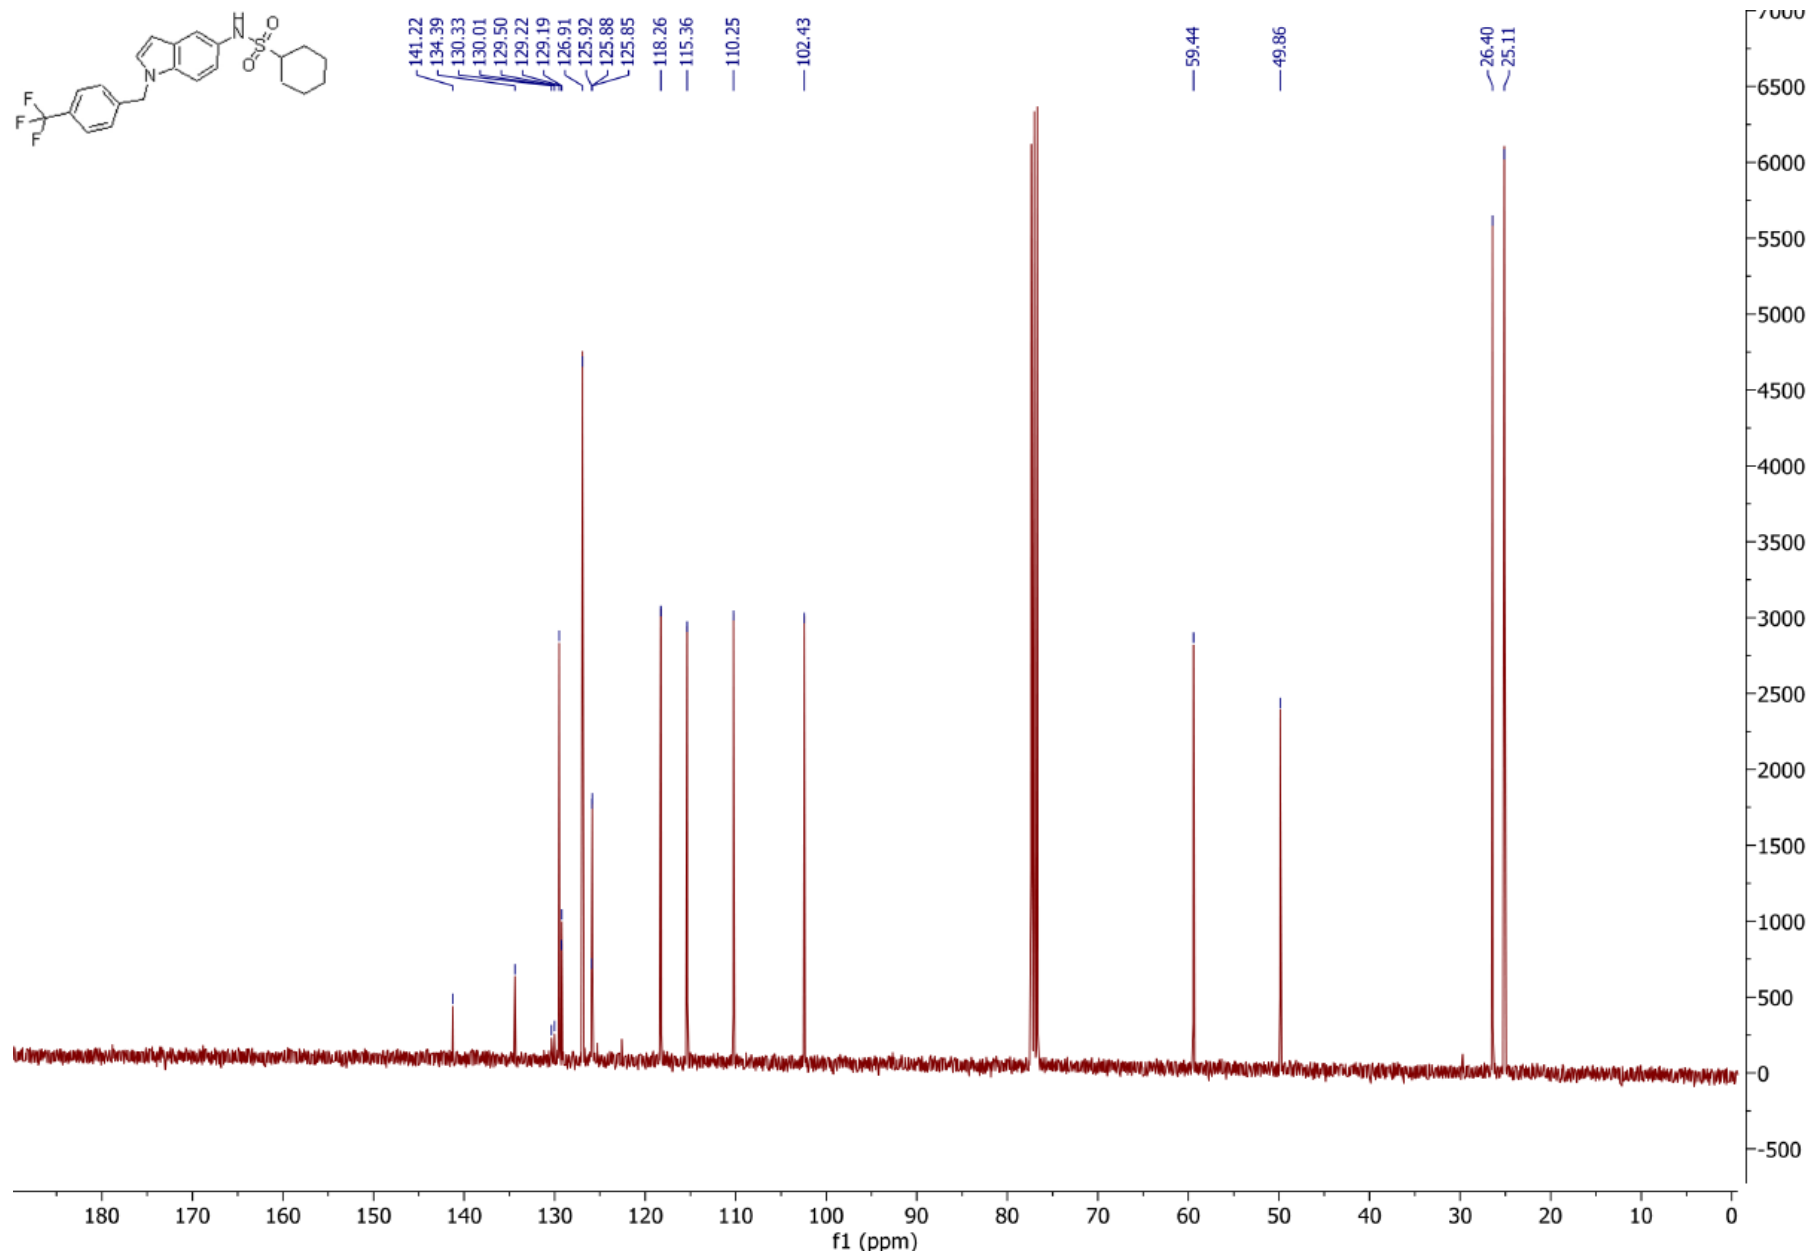

$^{13}\text{C}$  NMR of compound **26a**

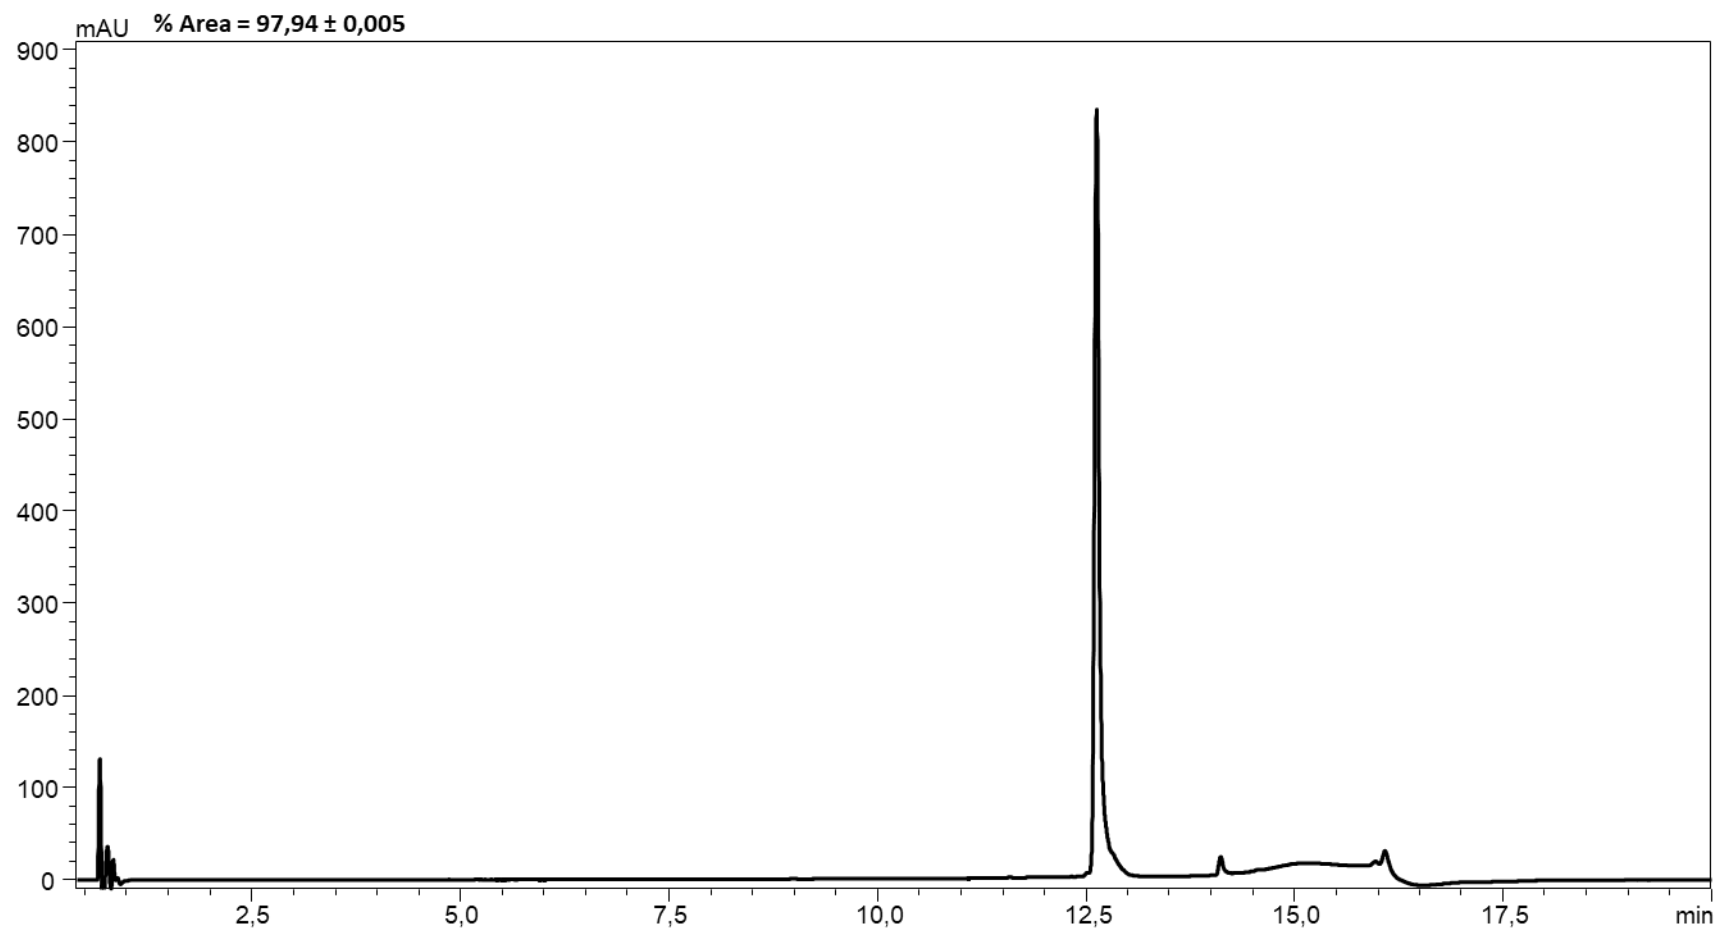

RP-HPLC trace of compound **26a**

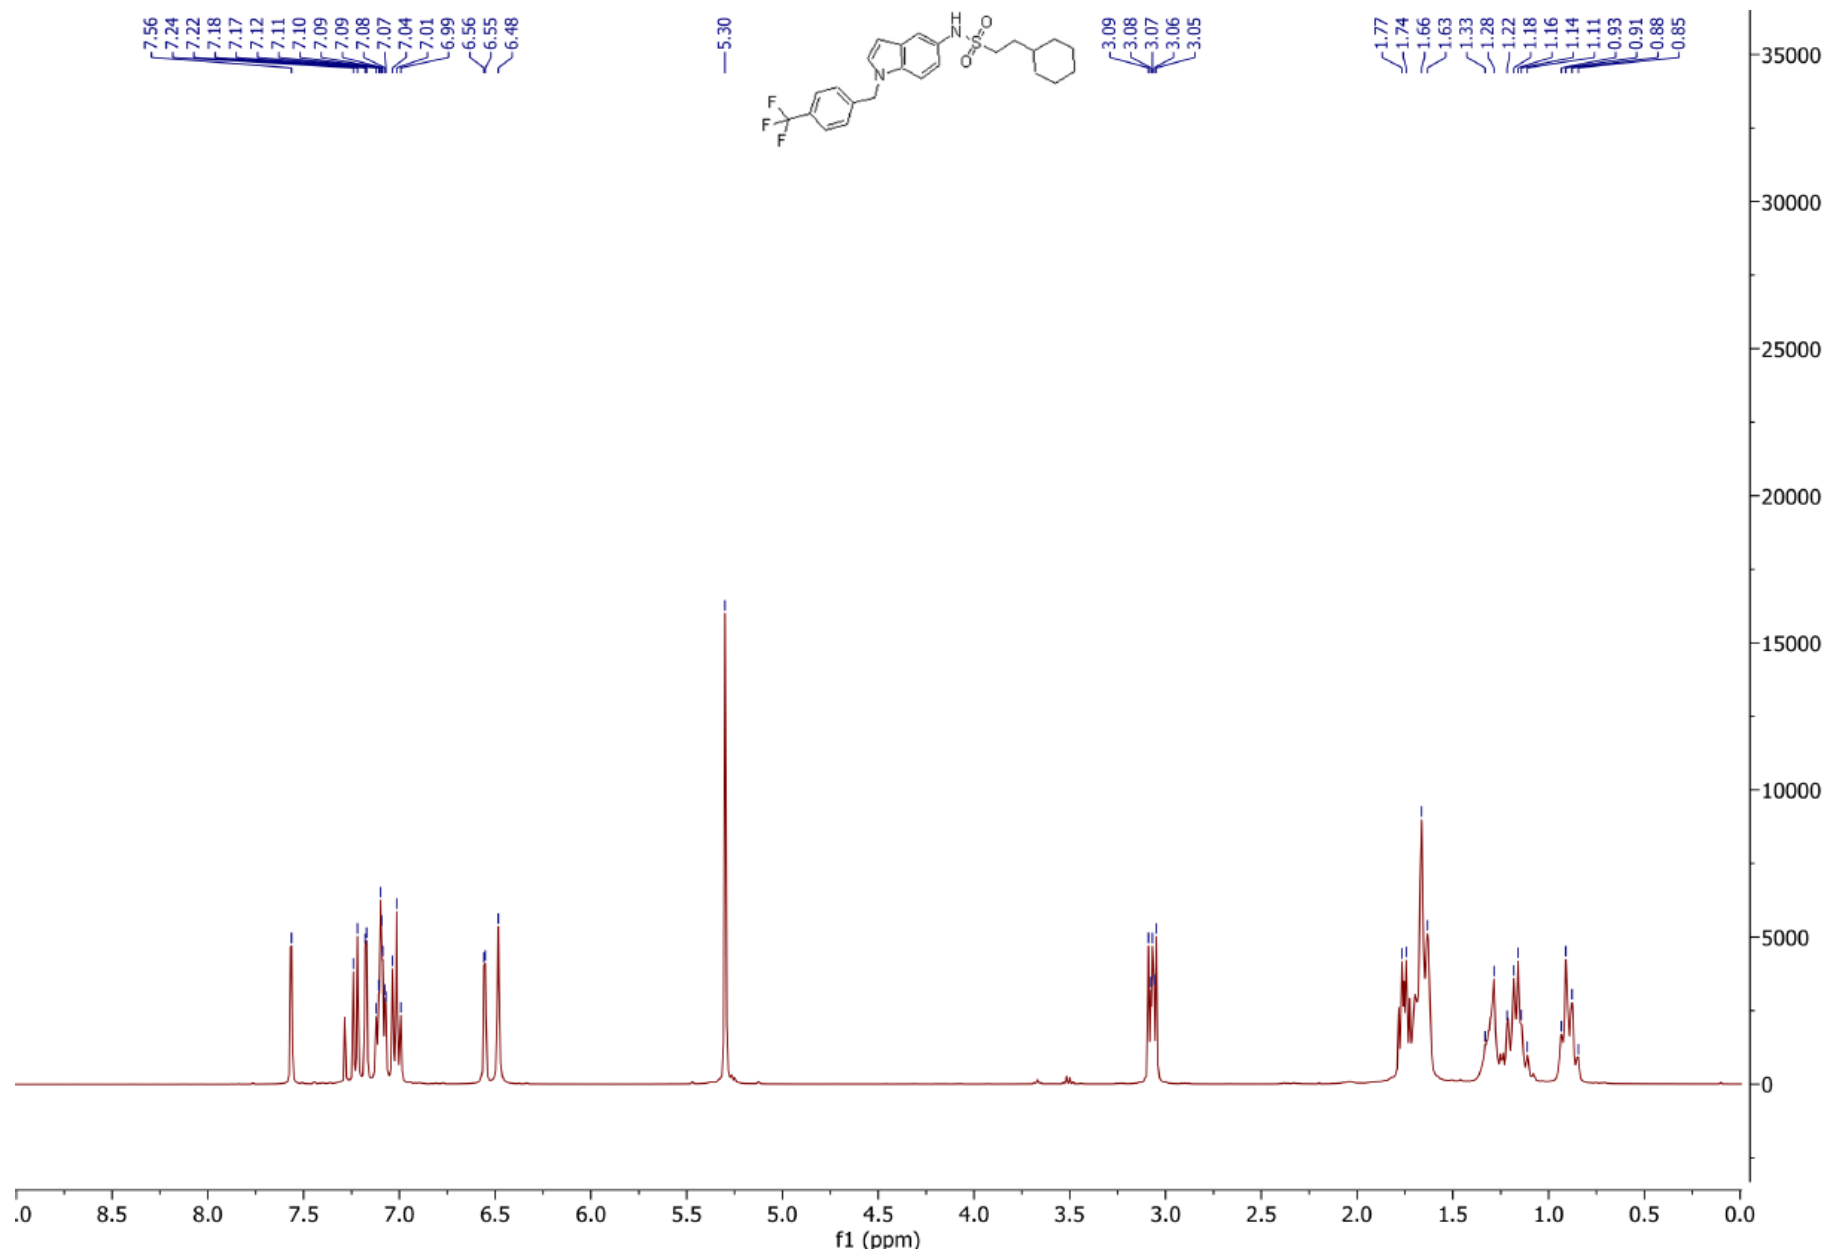

<sup>1</sup>H NMR of compound **27a**

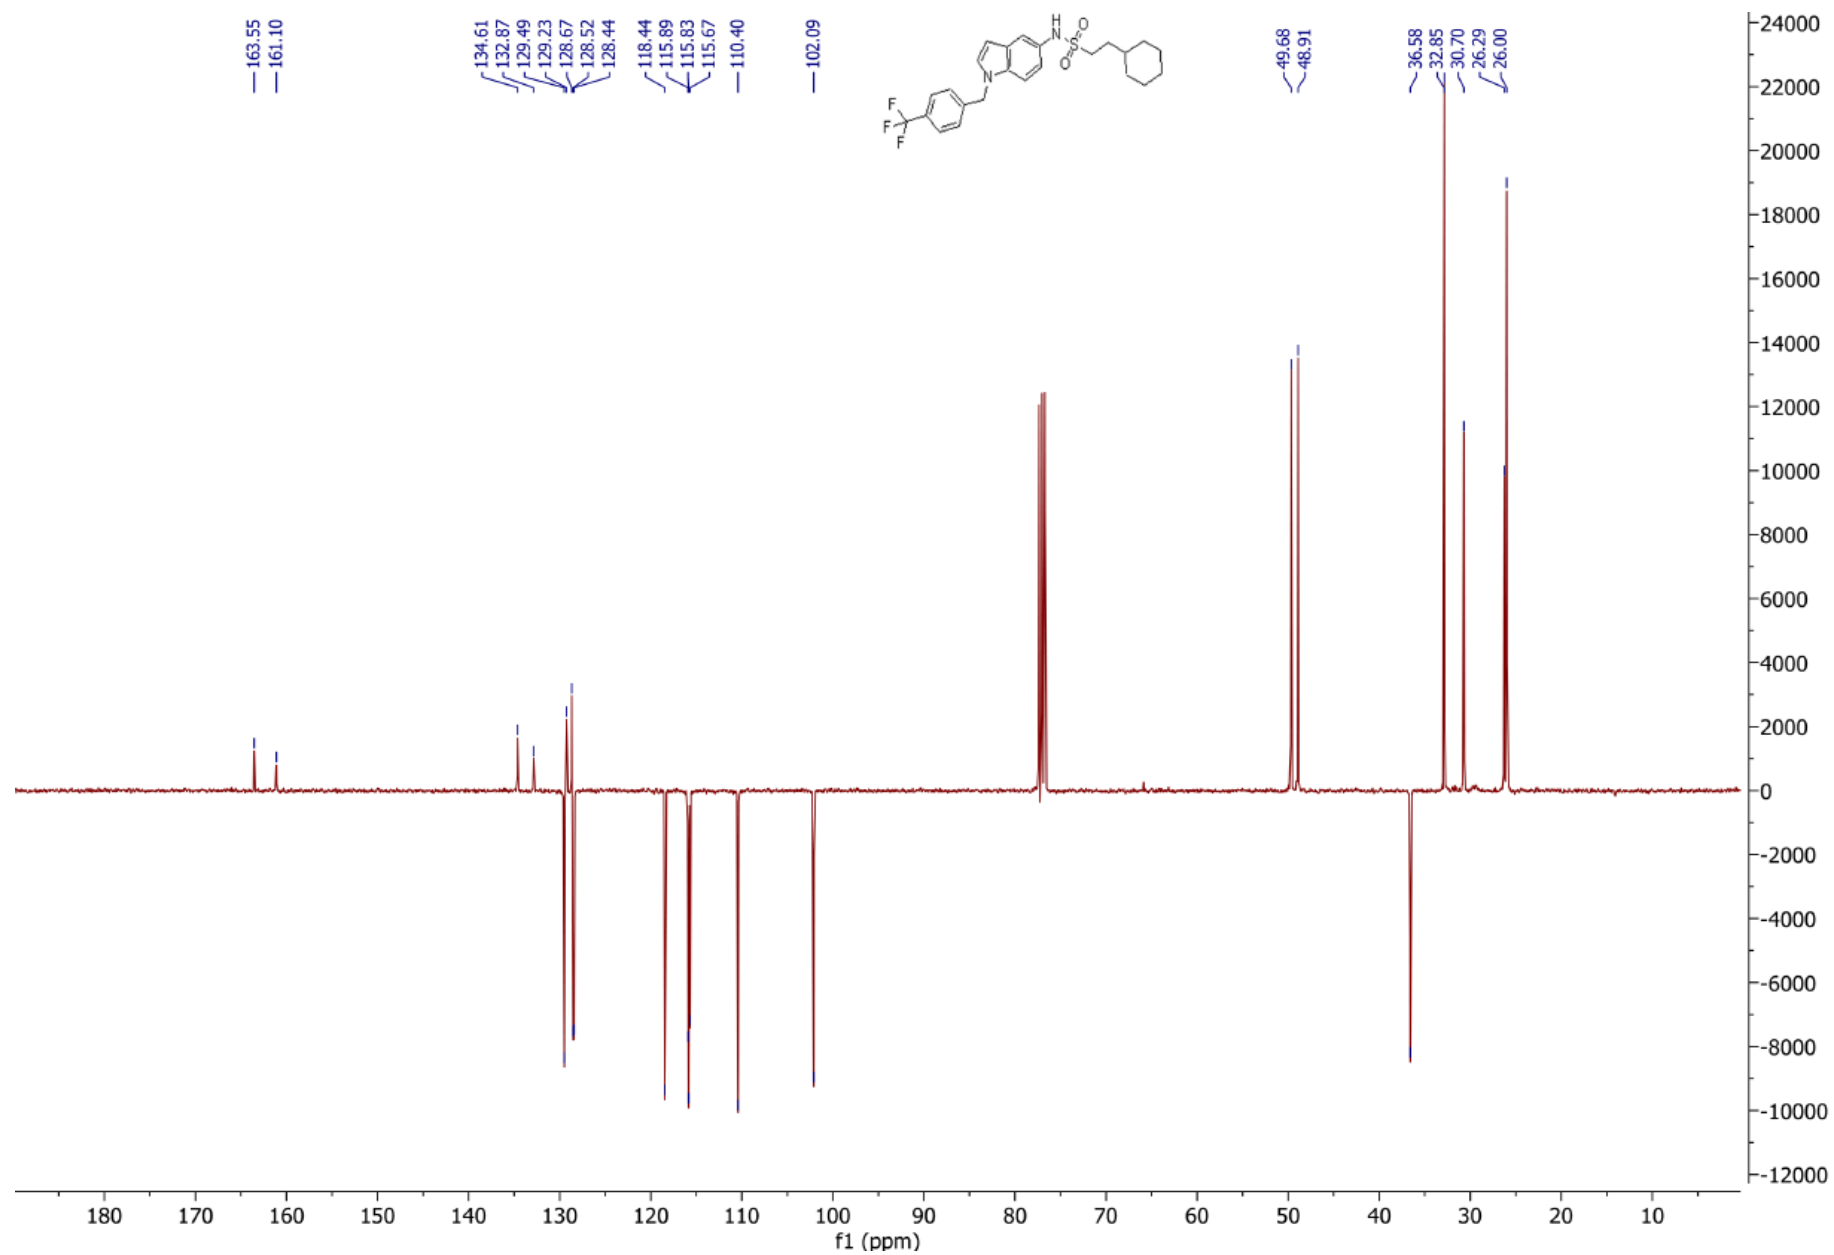

qDEPT NMR of compound **27a**

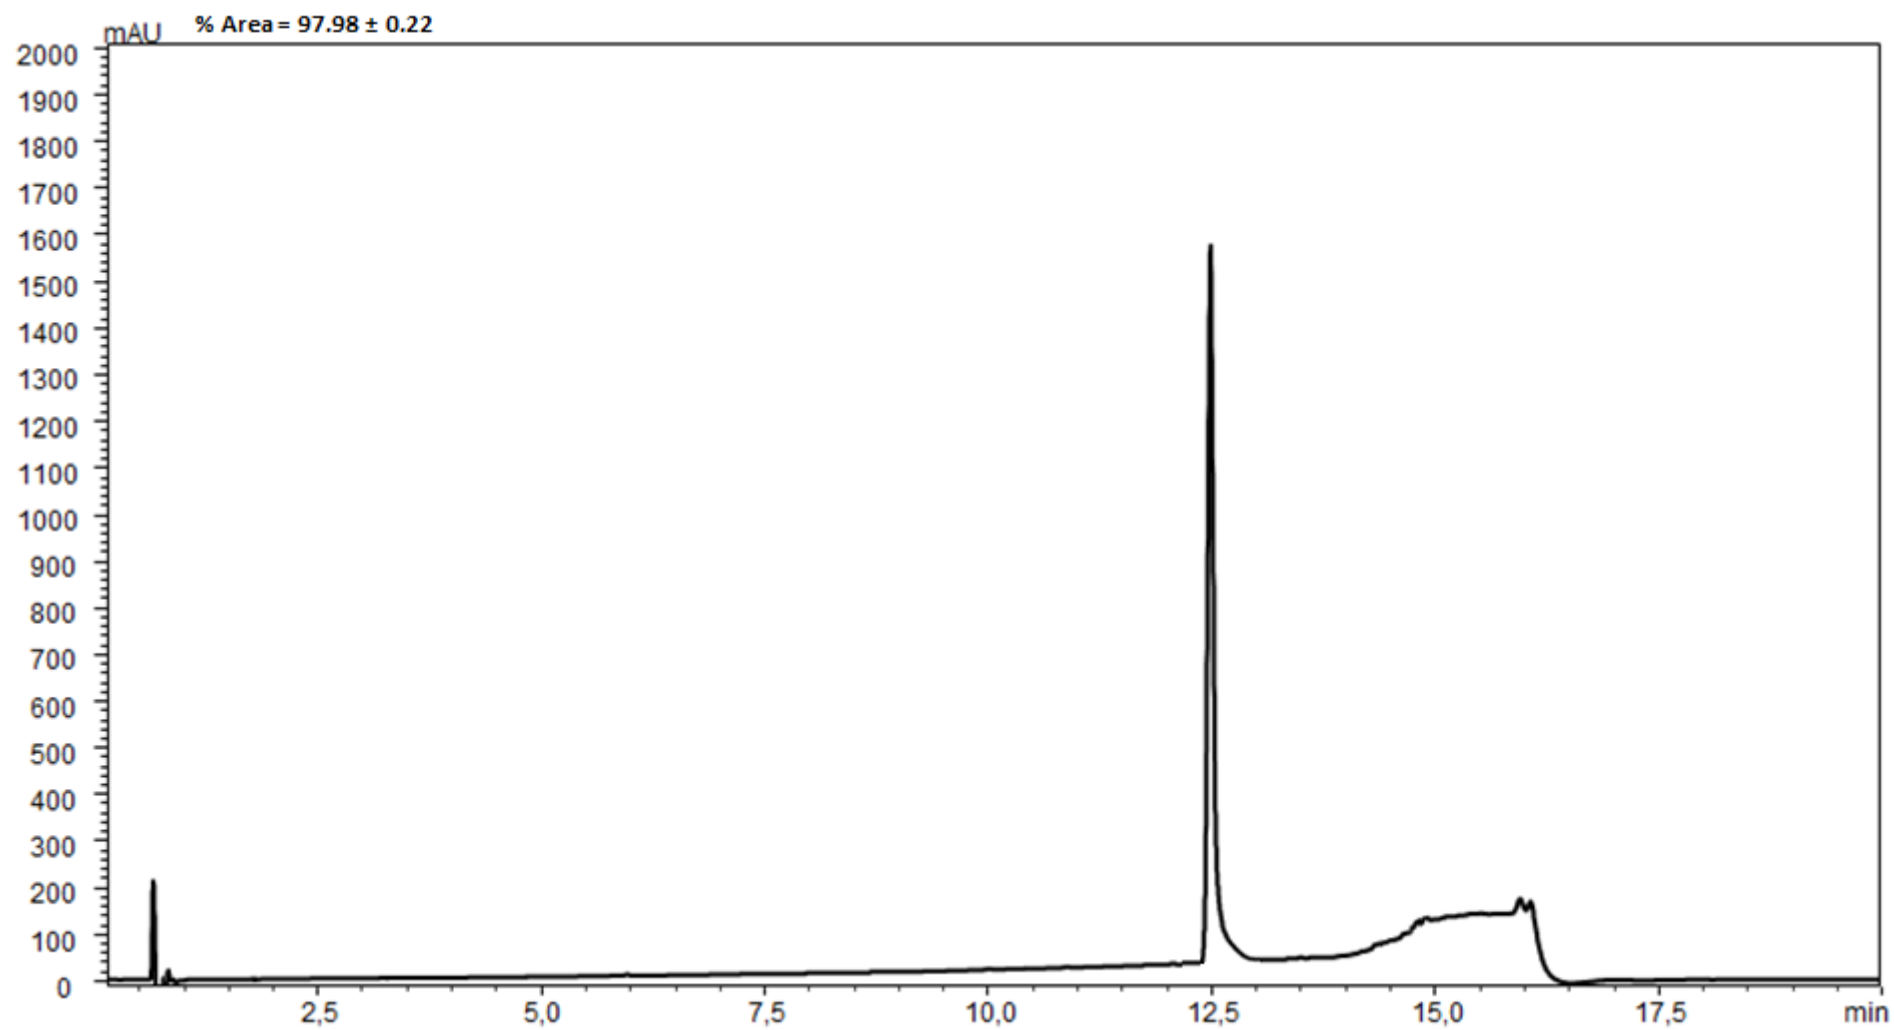

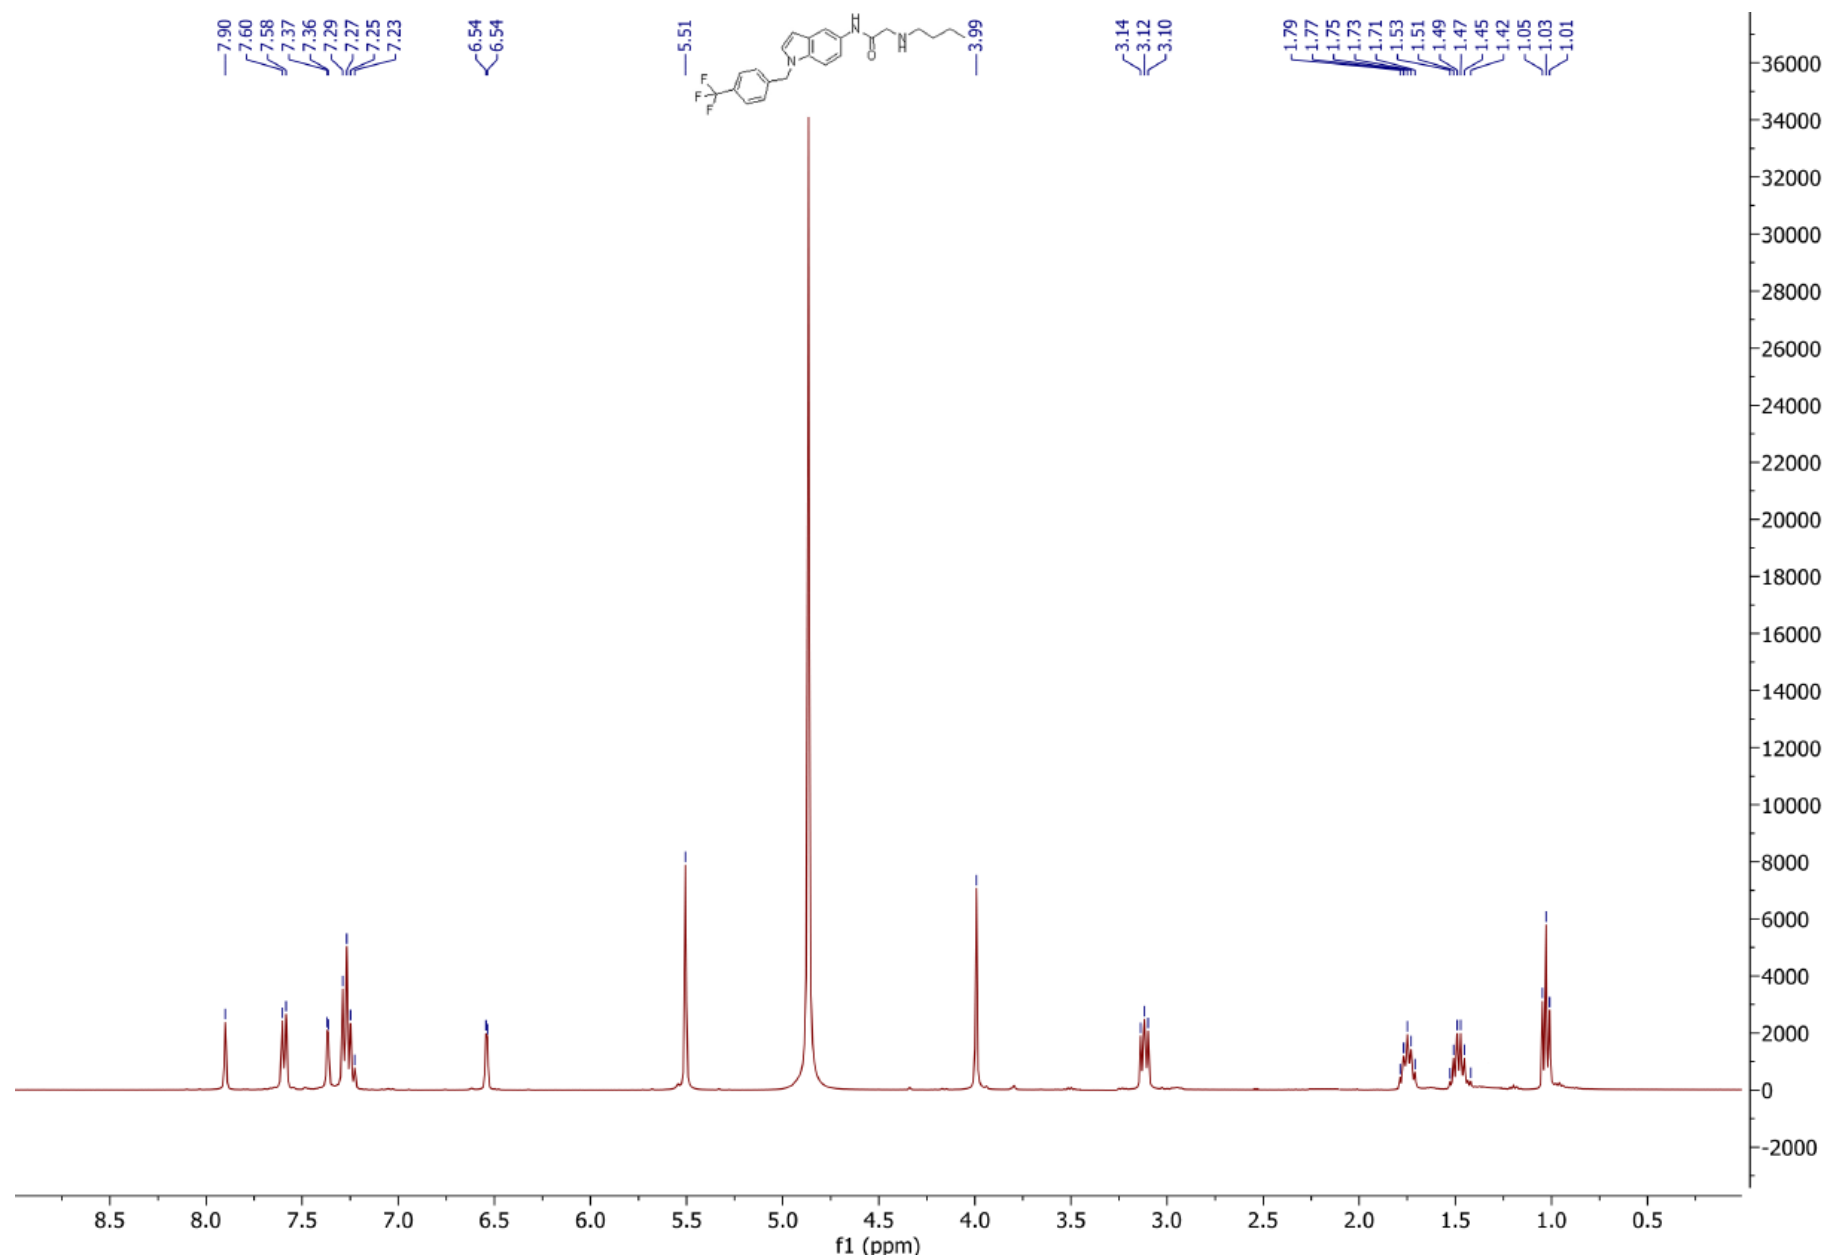

<sup>1</sup>H NMR of compound **28a**



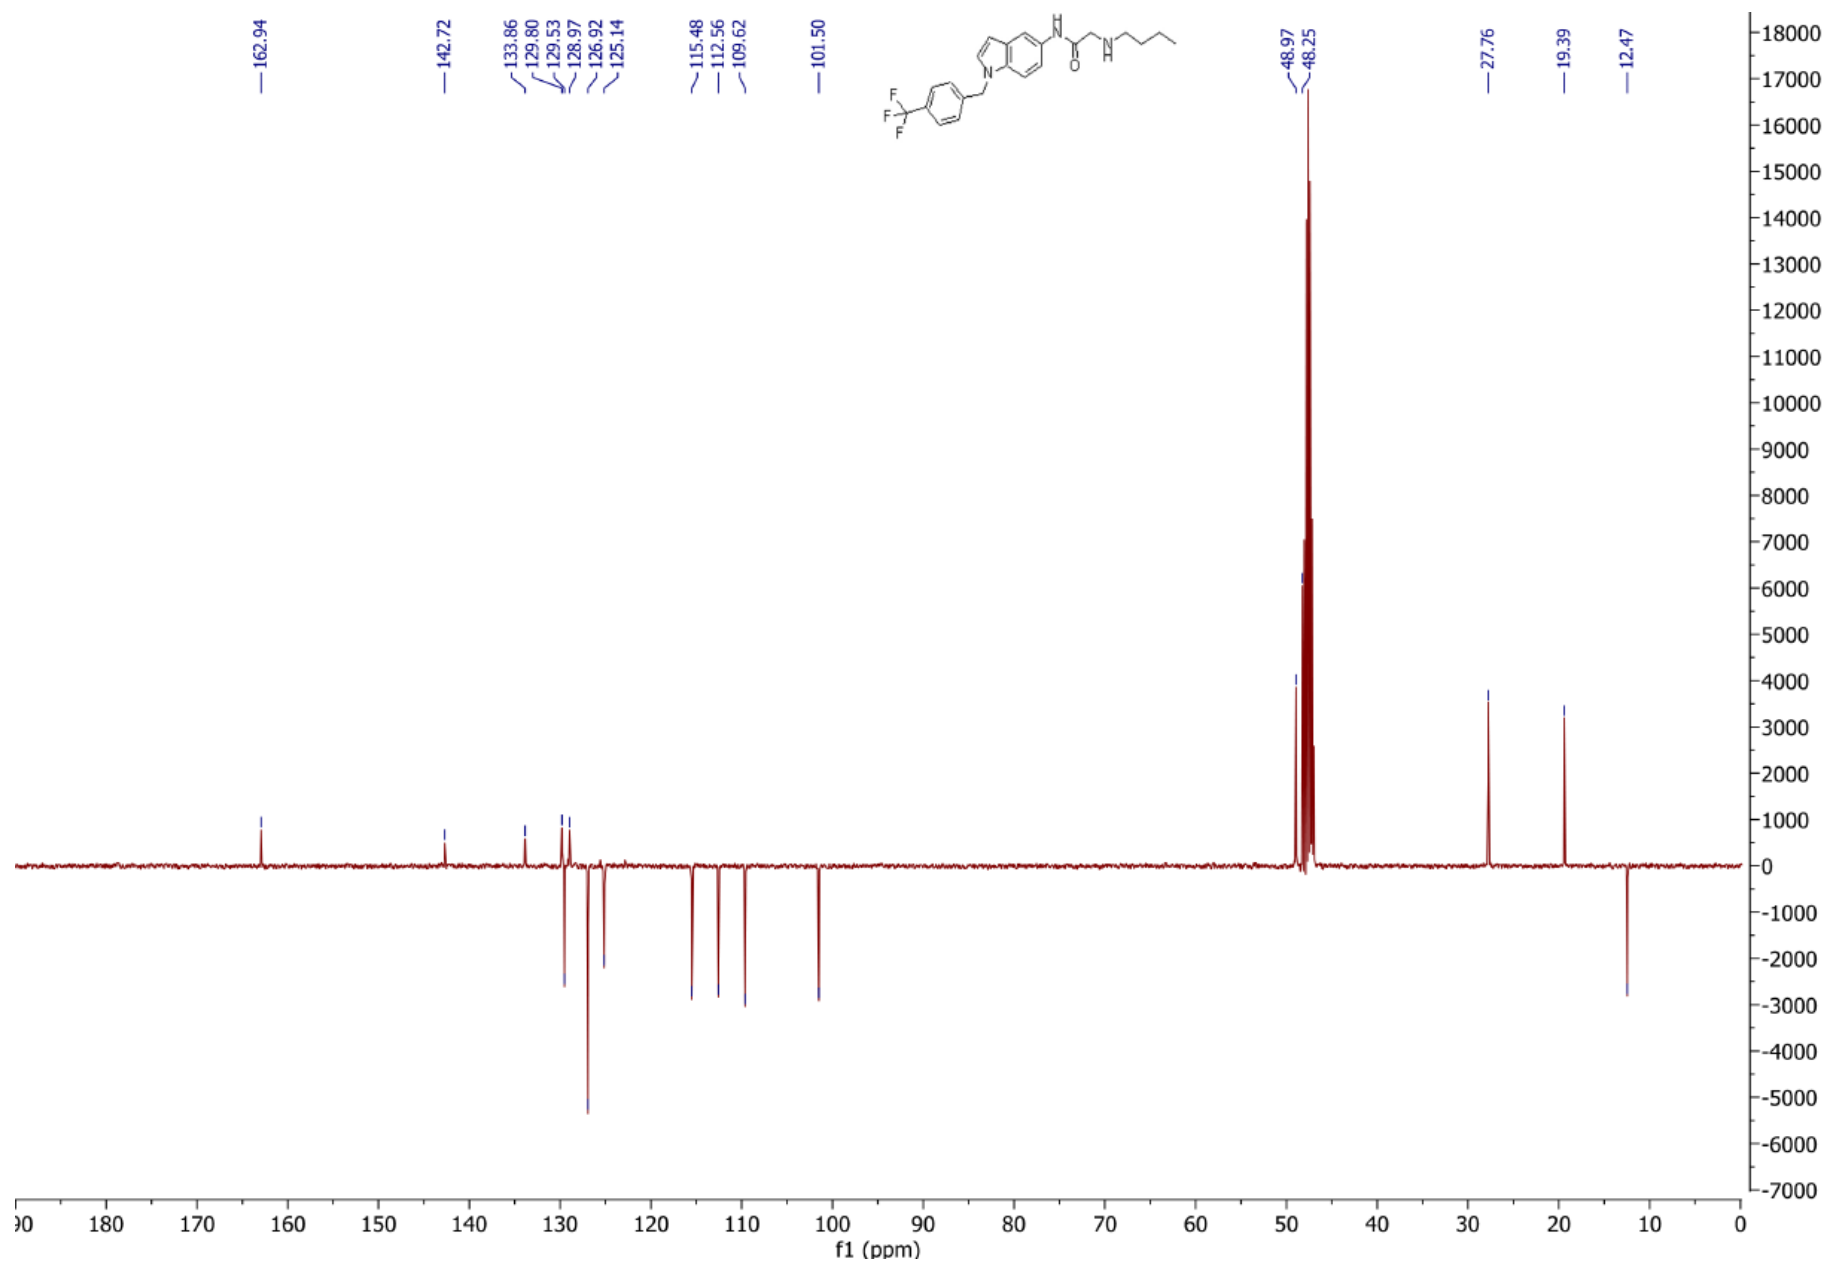

qDEPT NMR of compound **28a**

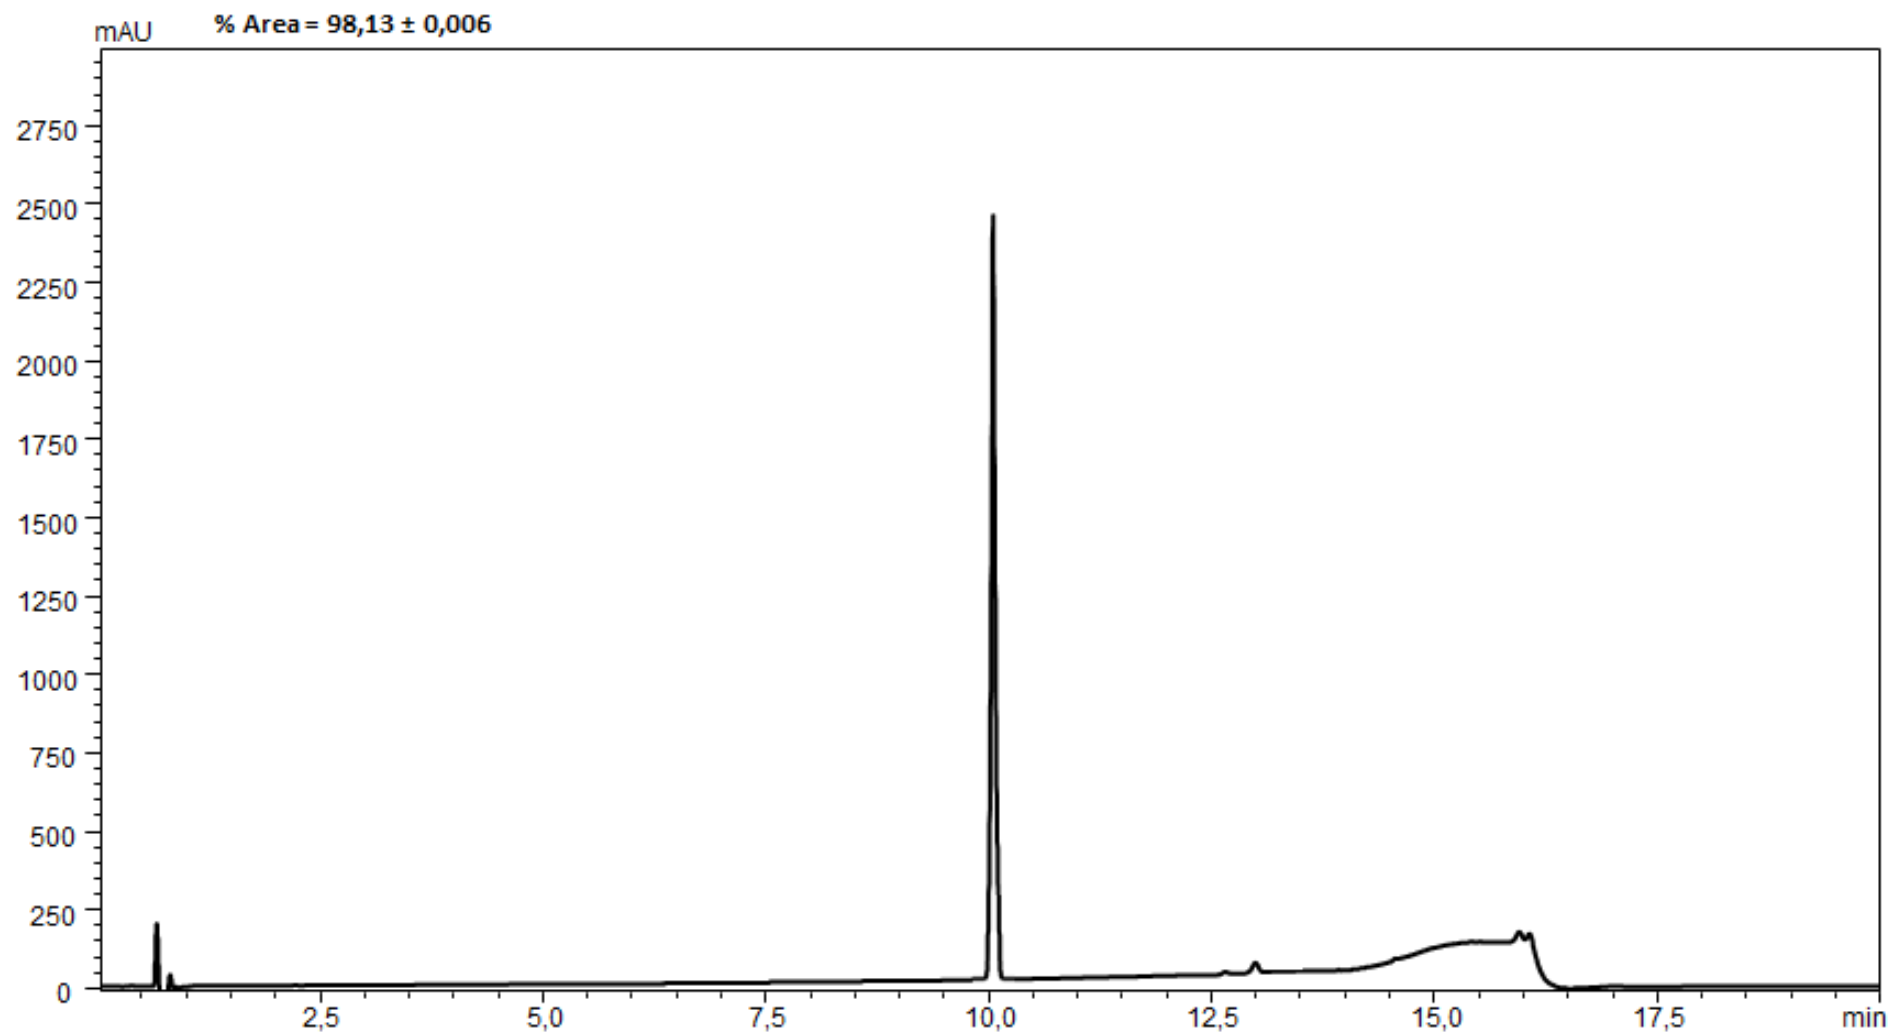

RP-HPLC trace of compound **28a**

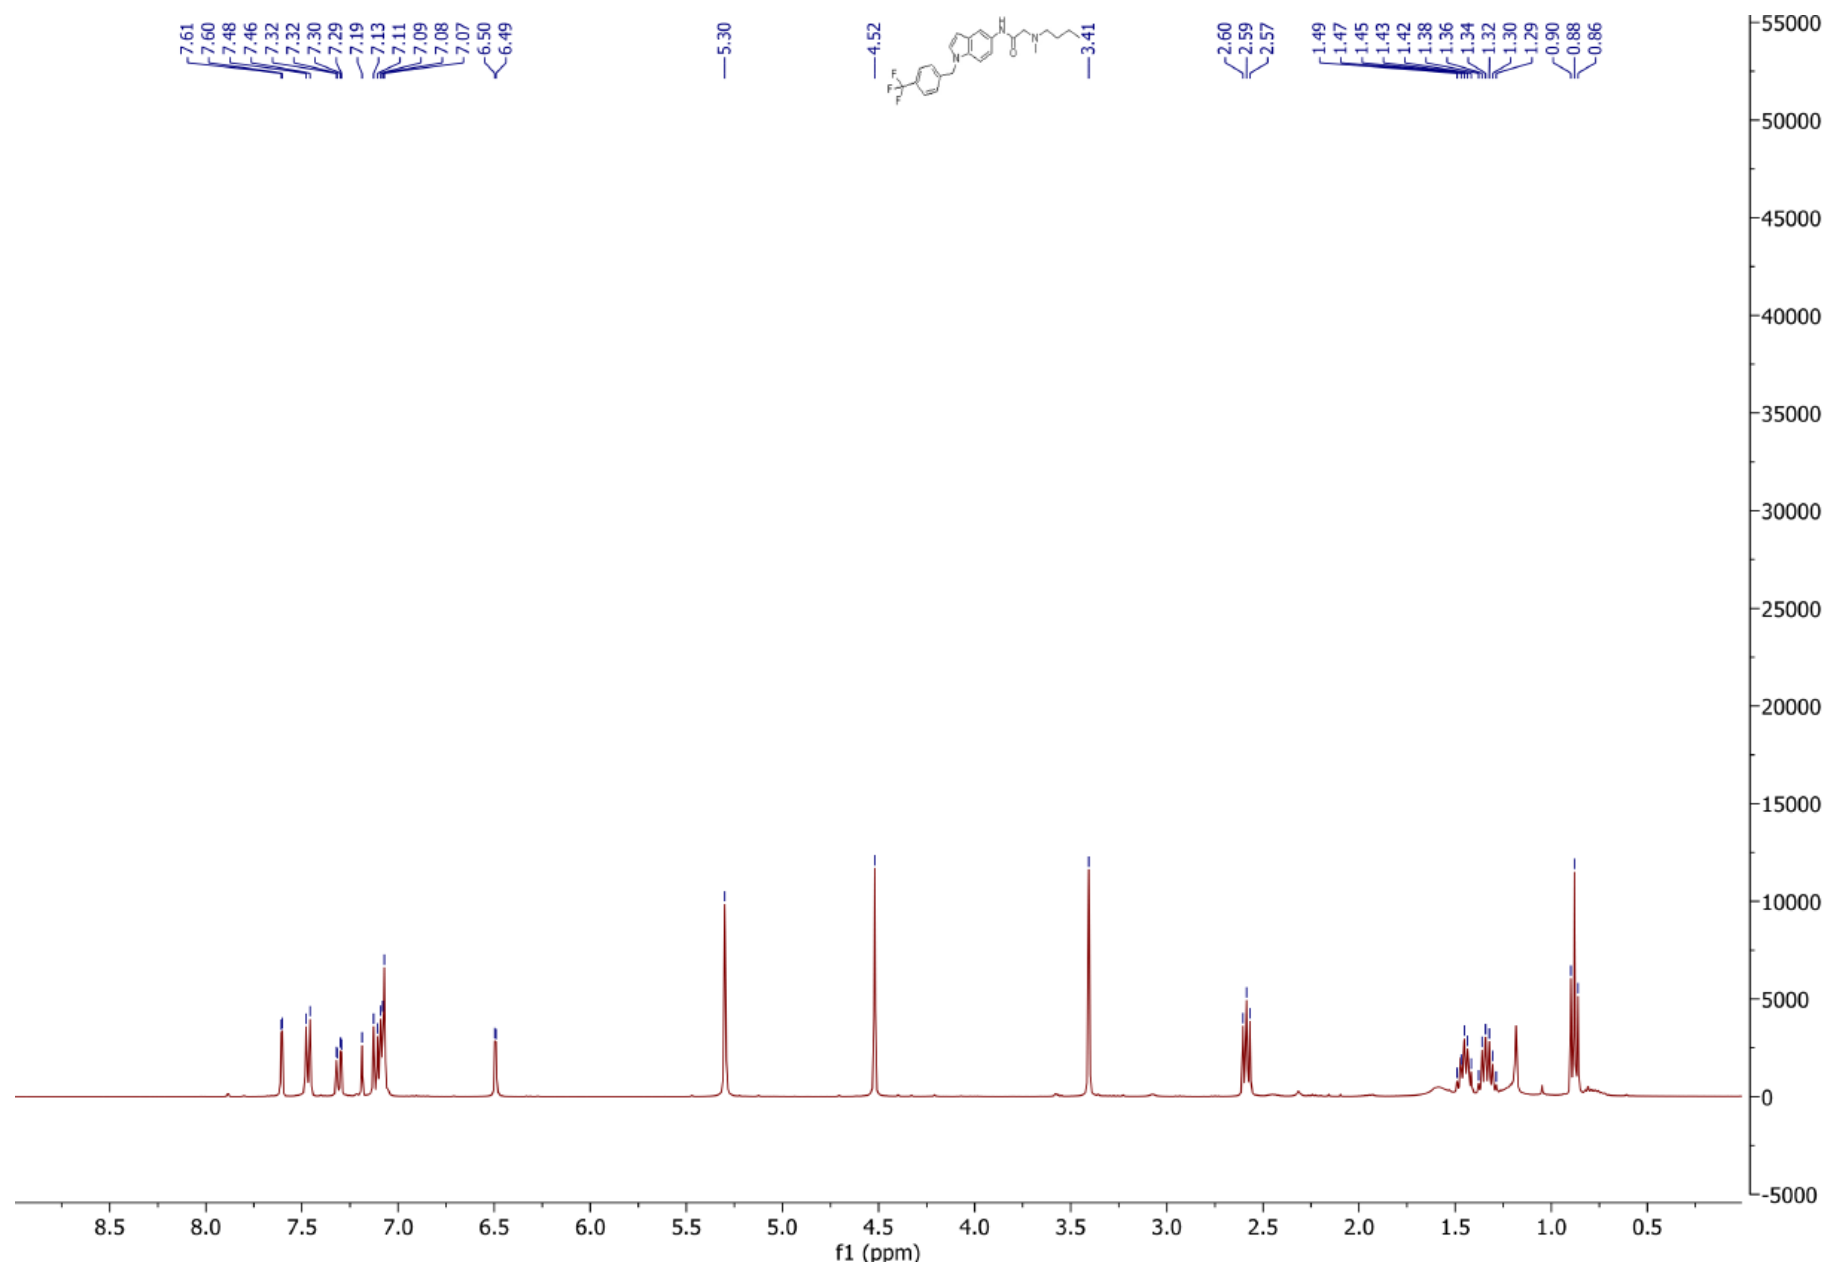

**<sup>1</sup>H NMR of compound 29a**

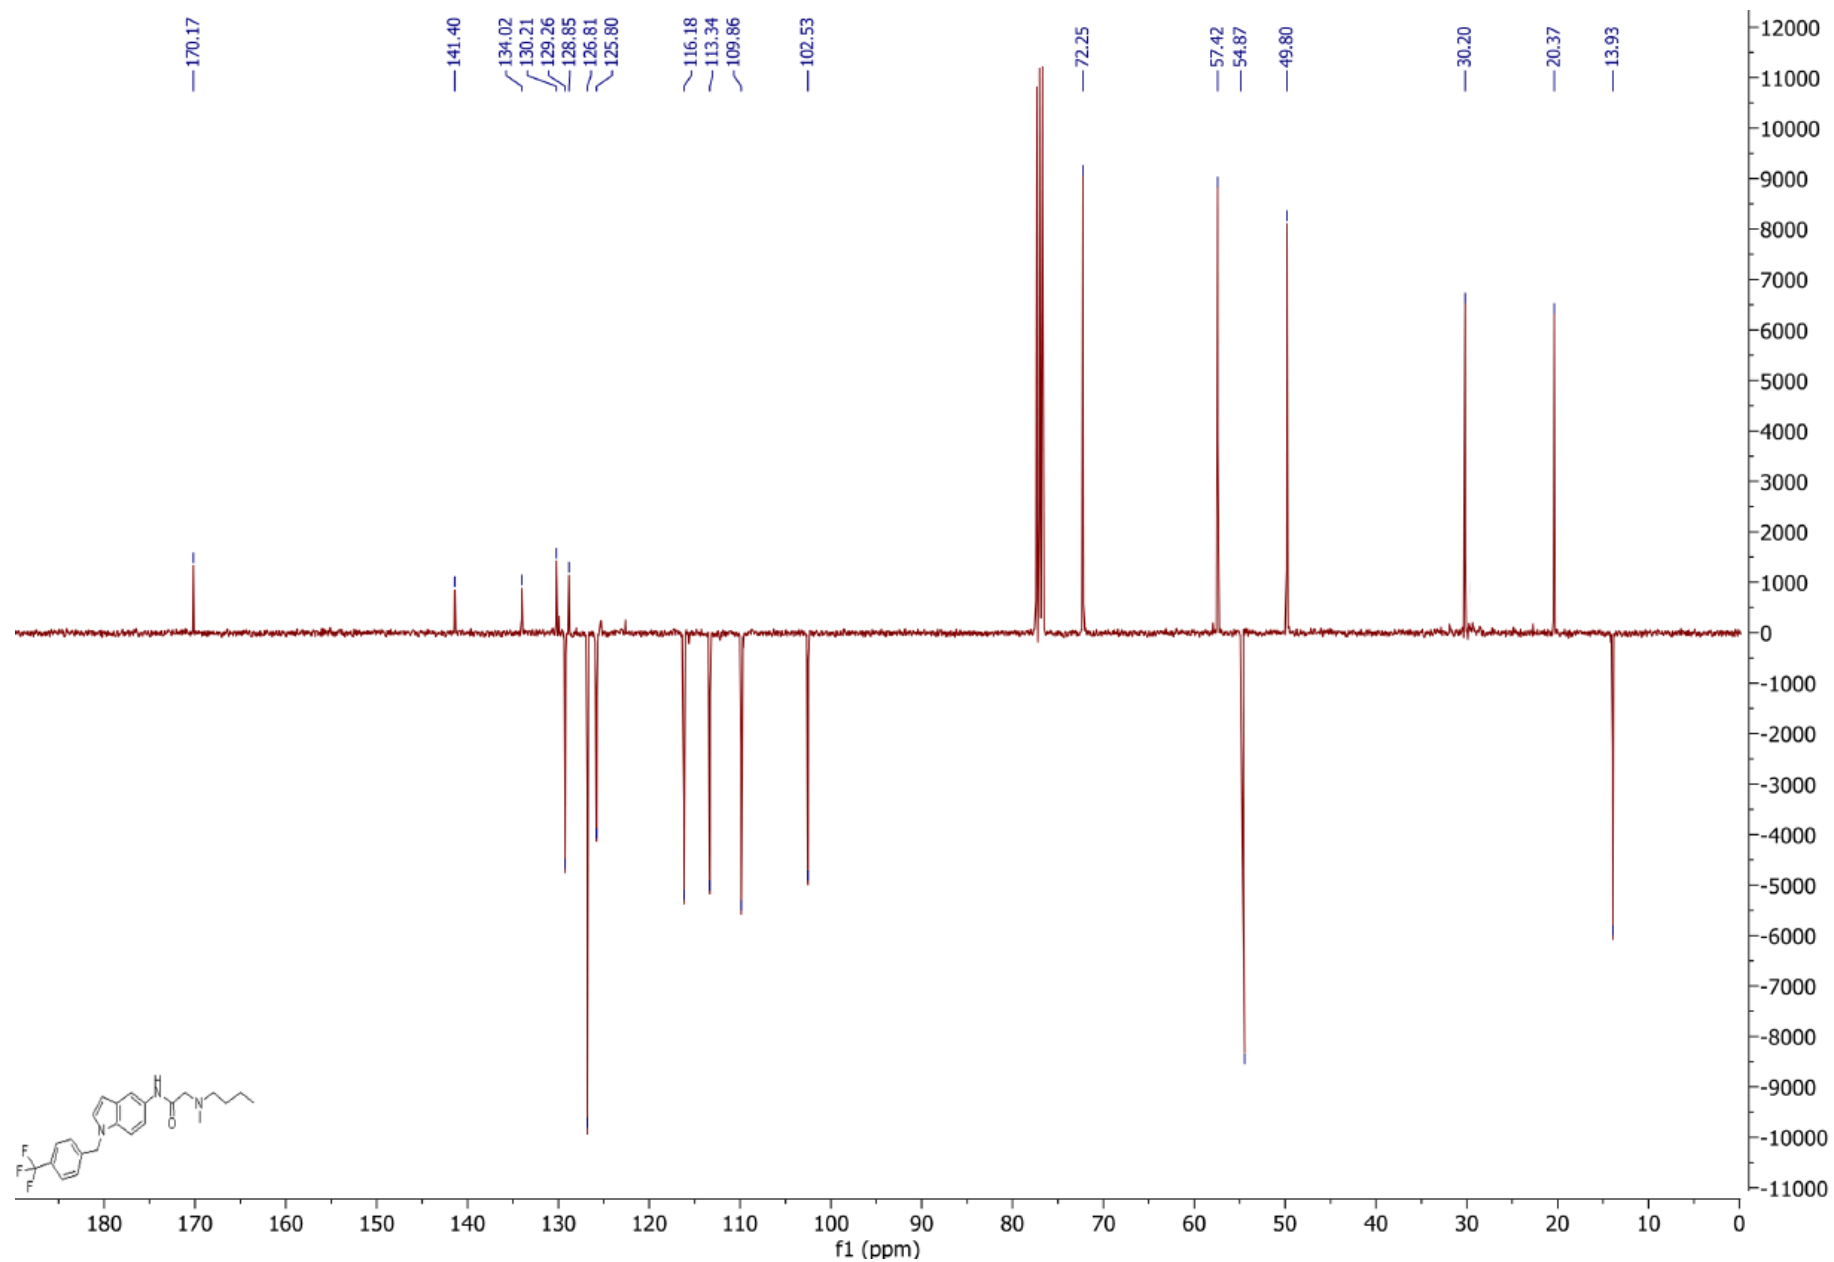

<sup>13</sup>C NMR of compound **29a**

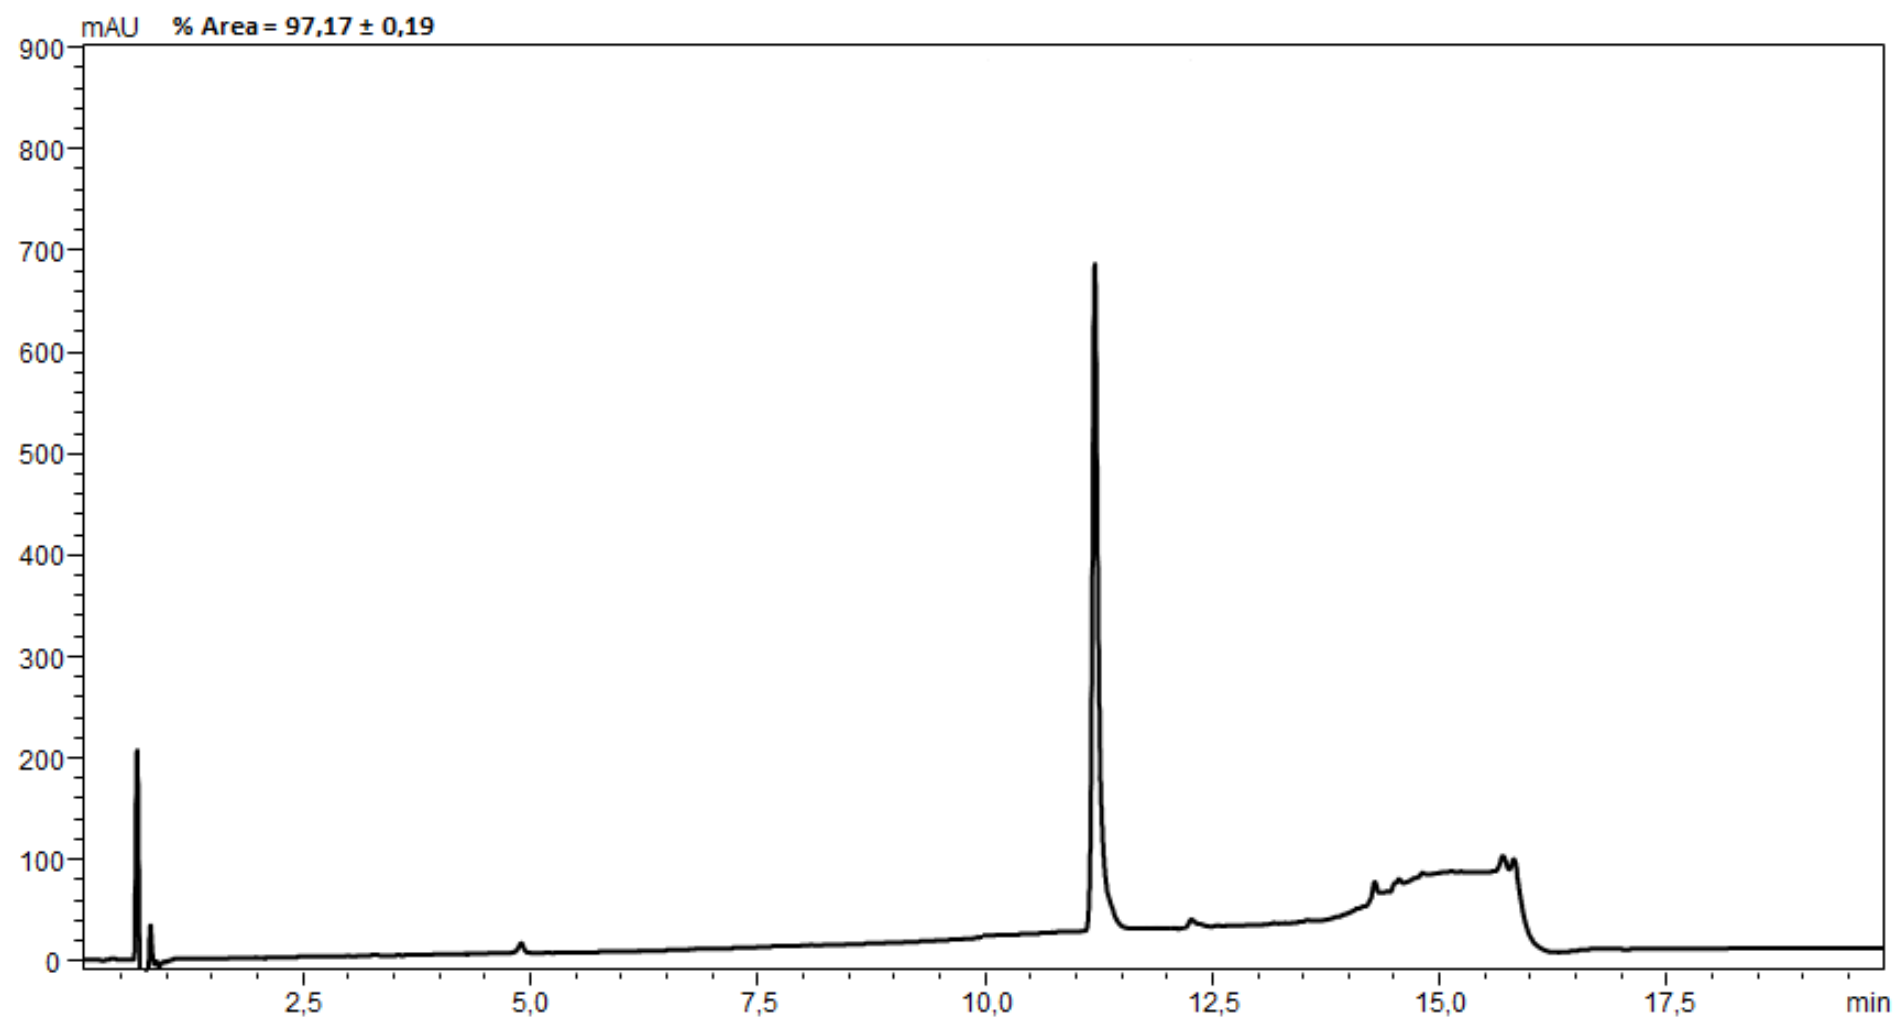

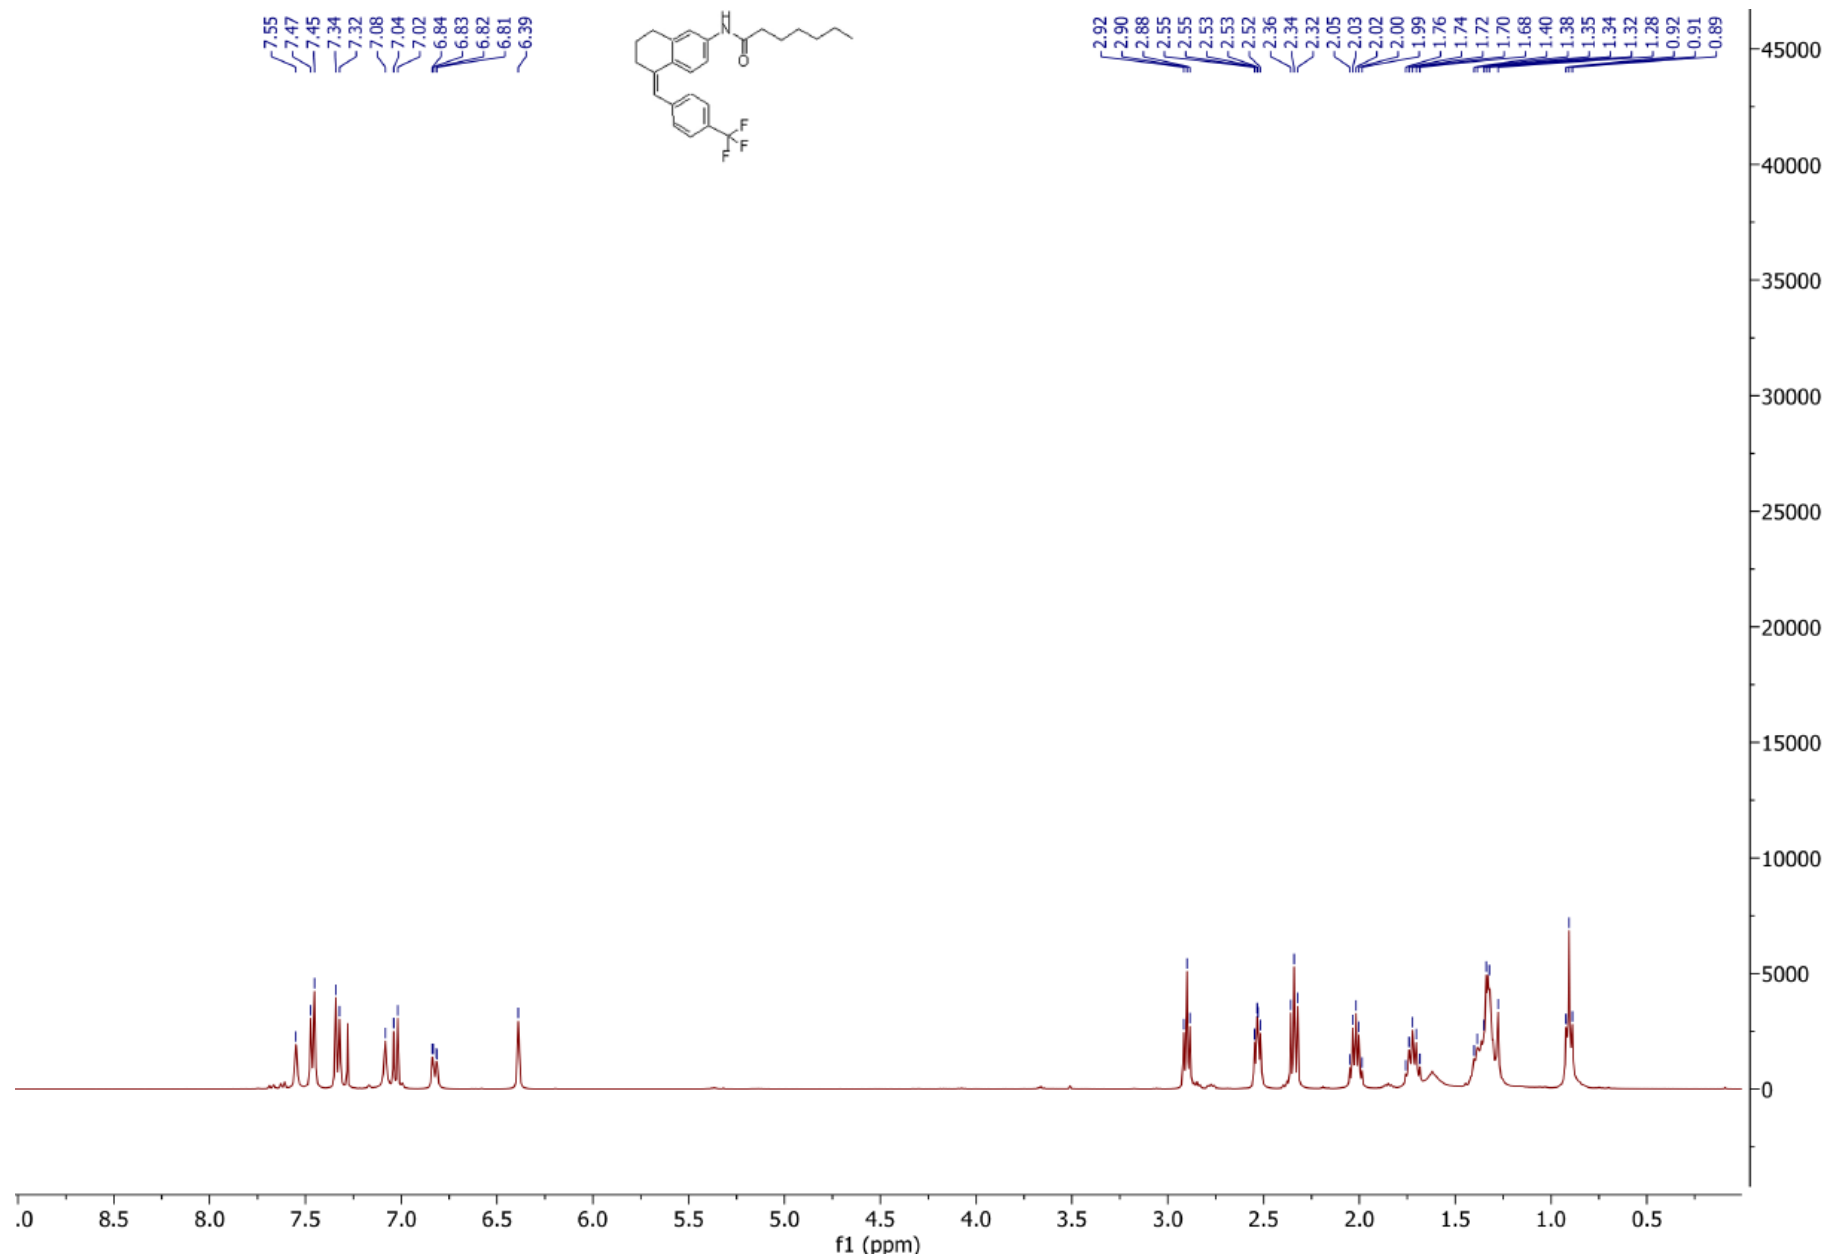

<sup>1</sup>H NMR of compound **33a**

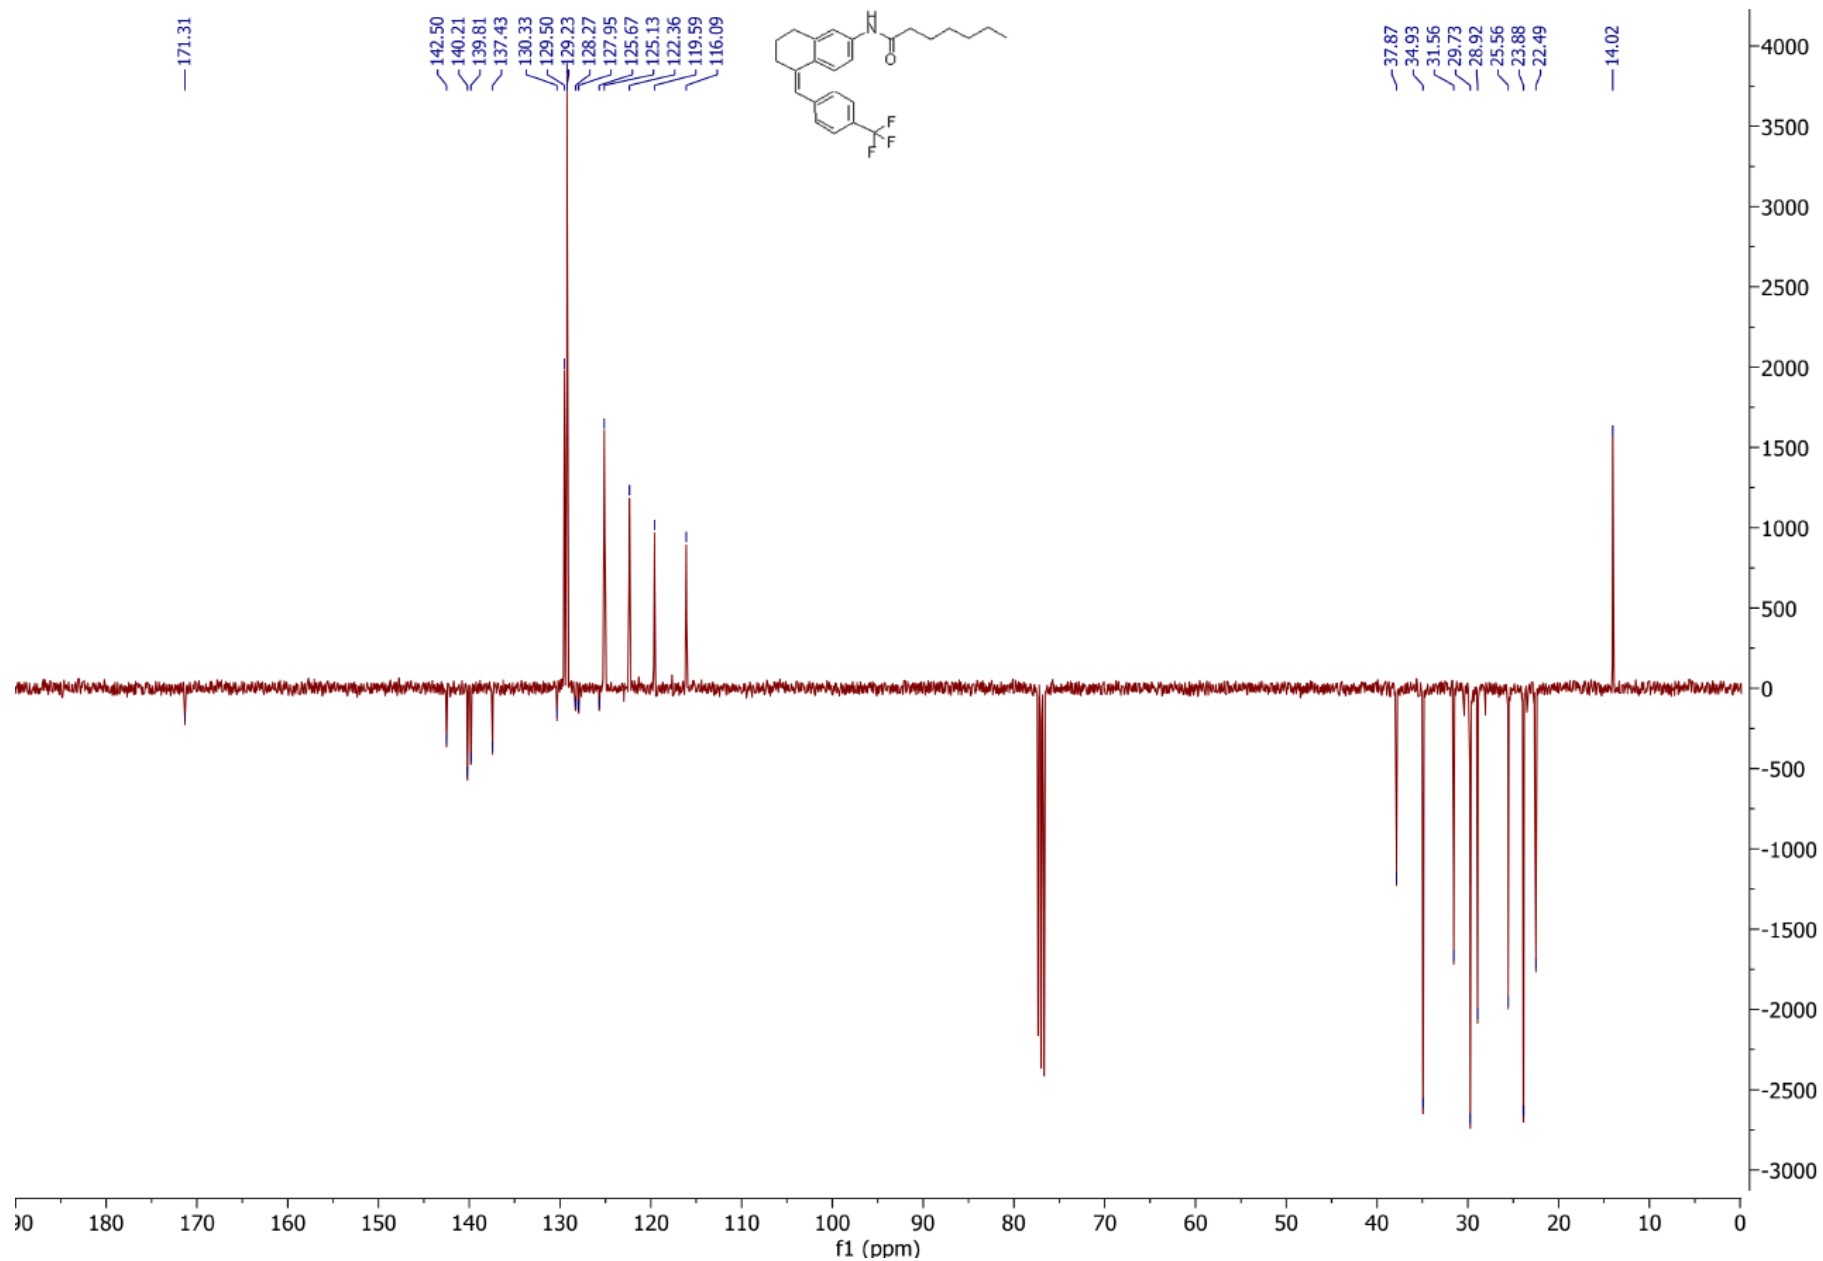

qDEPT NMR of compound **33a**

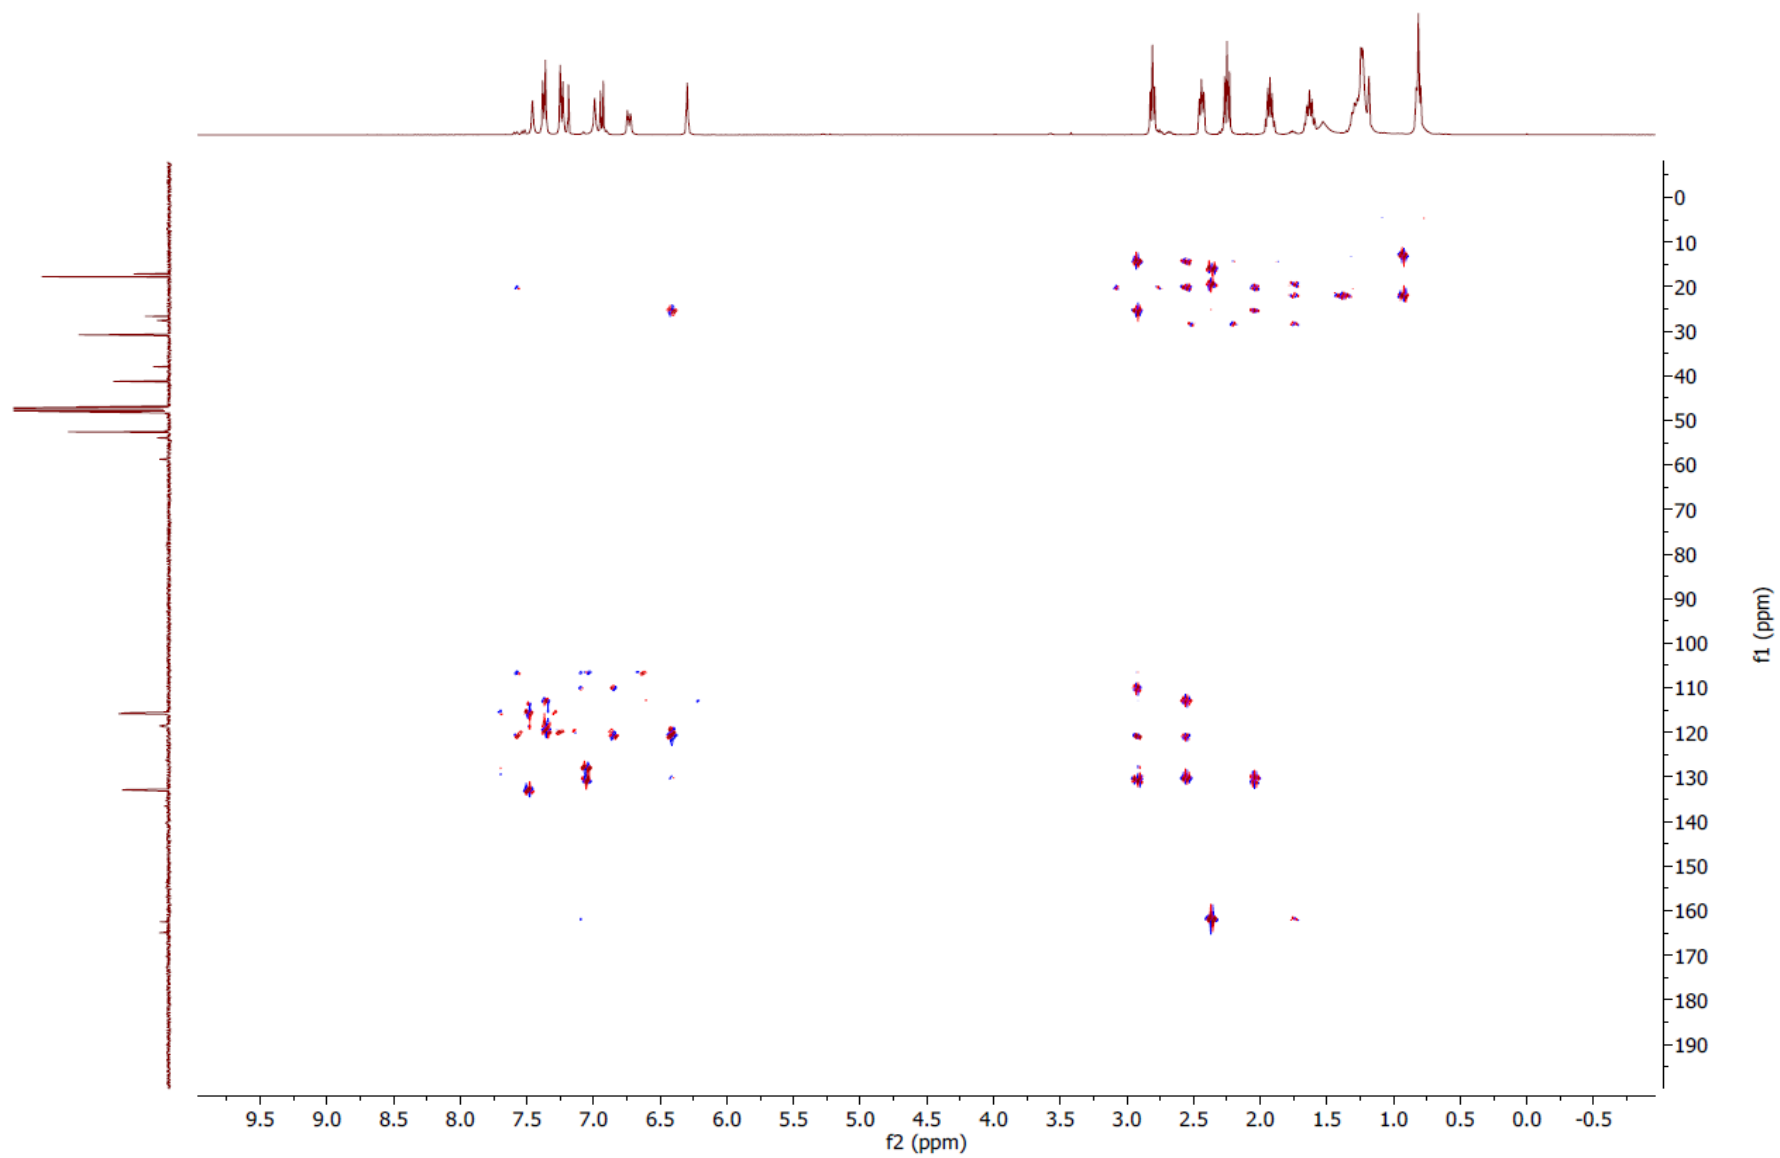

HMBC NMR spectra of compound **33a**



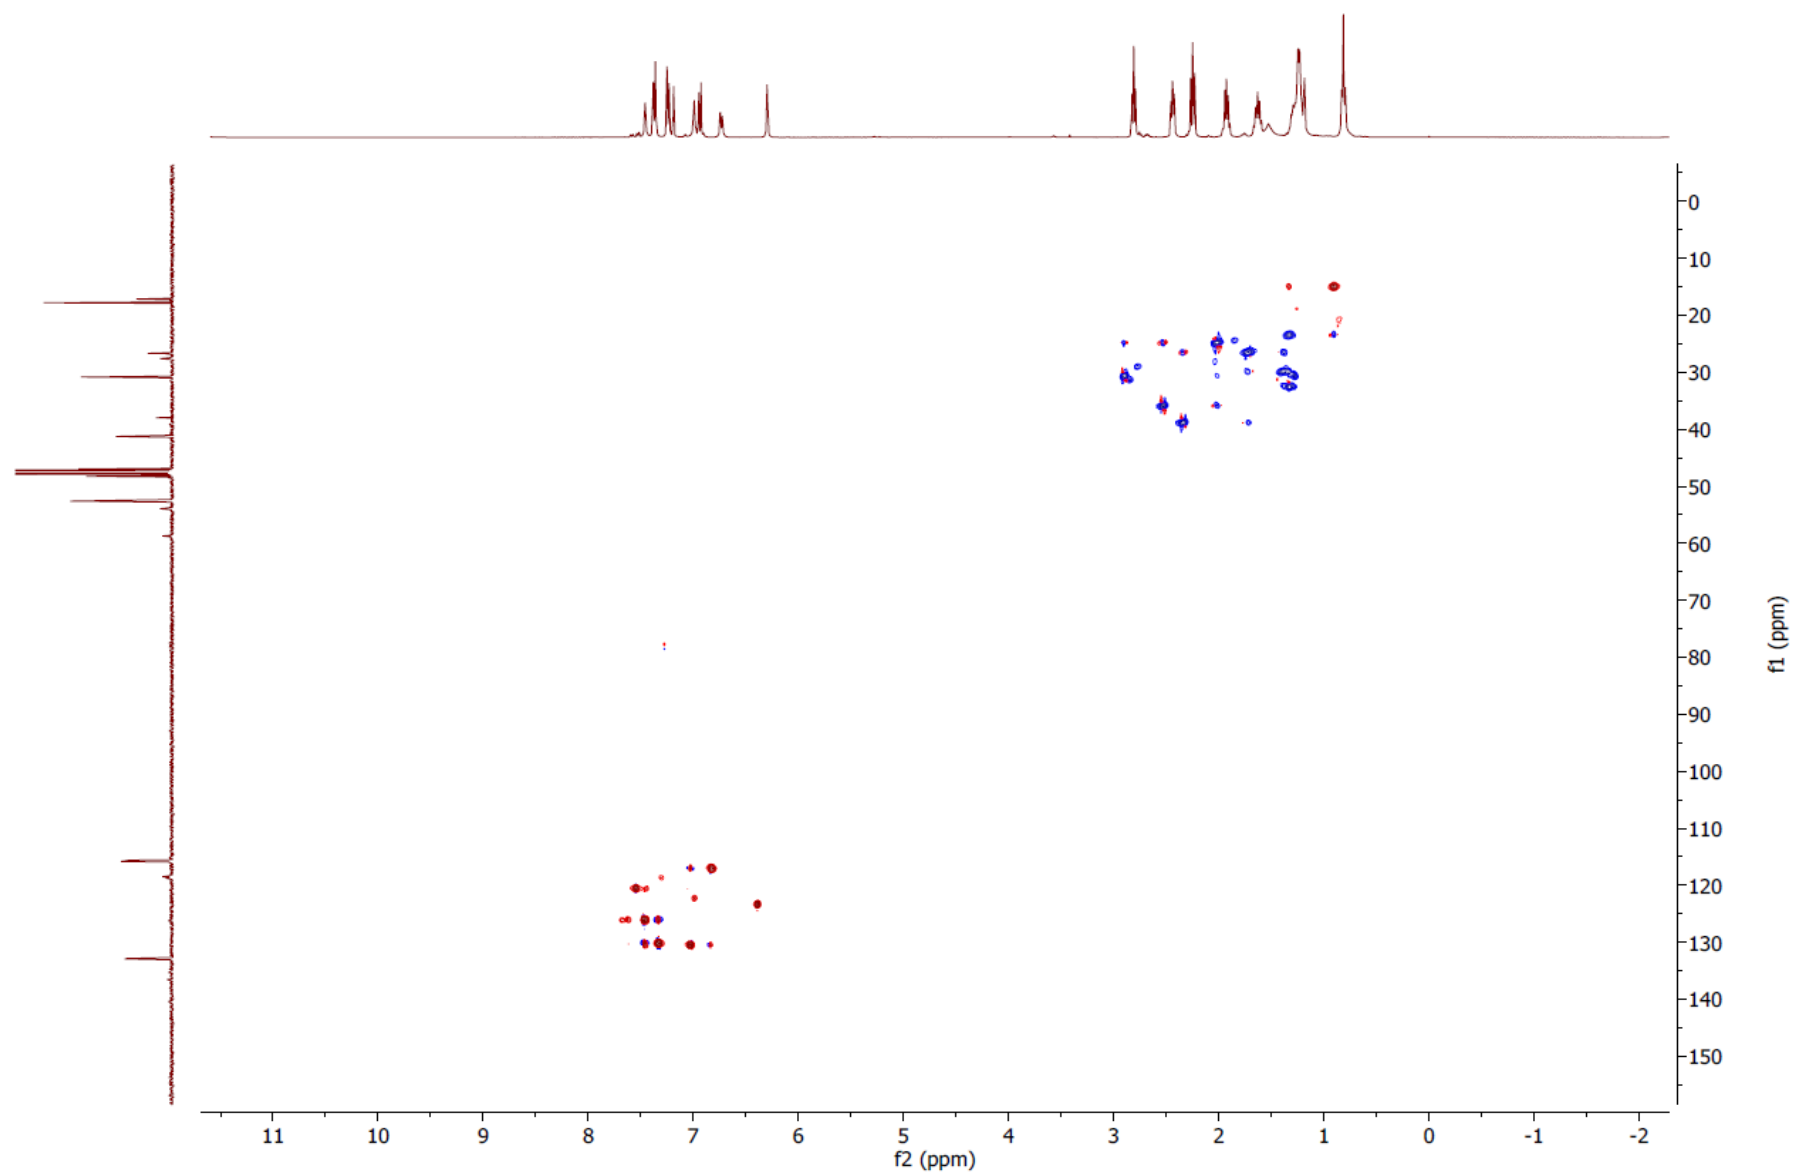

HMQC NMR spectra of compound **33a**

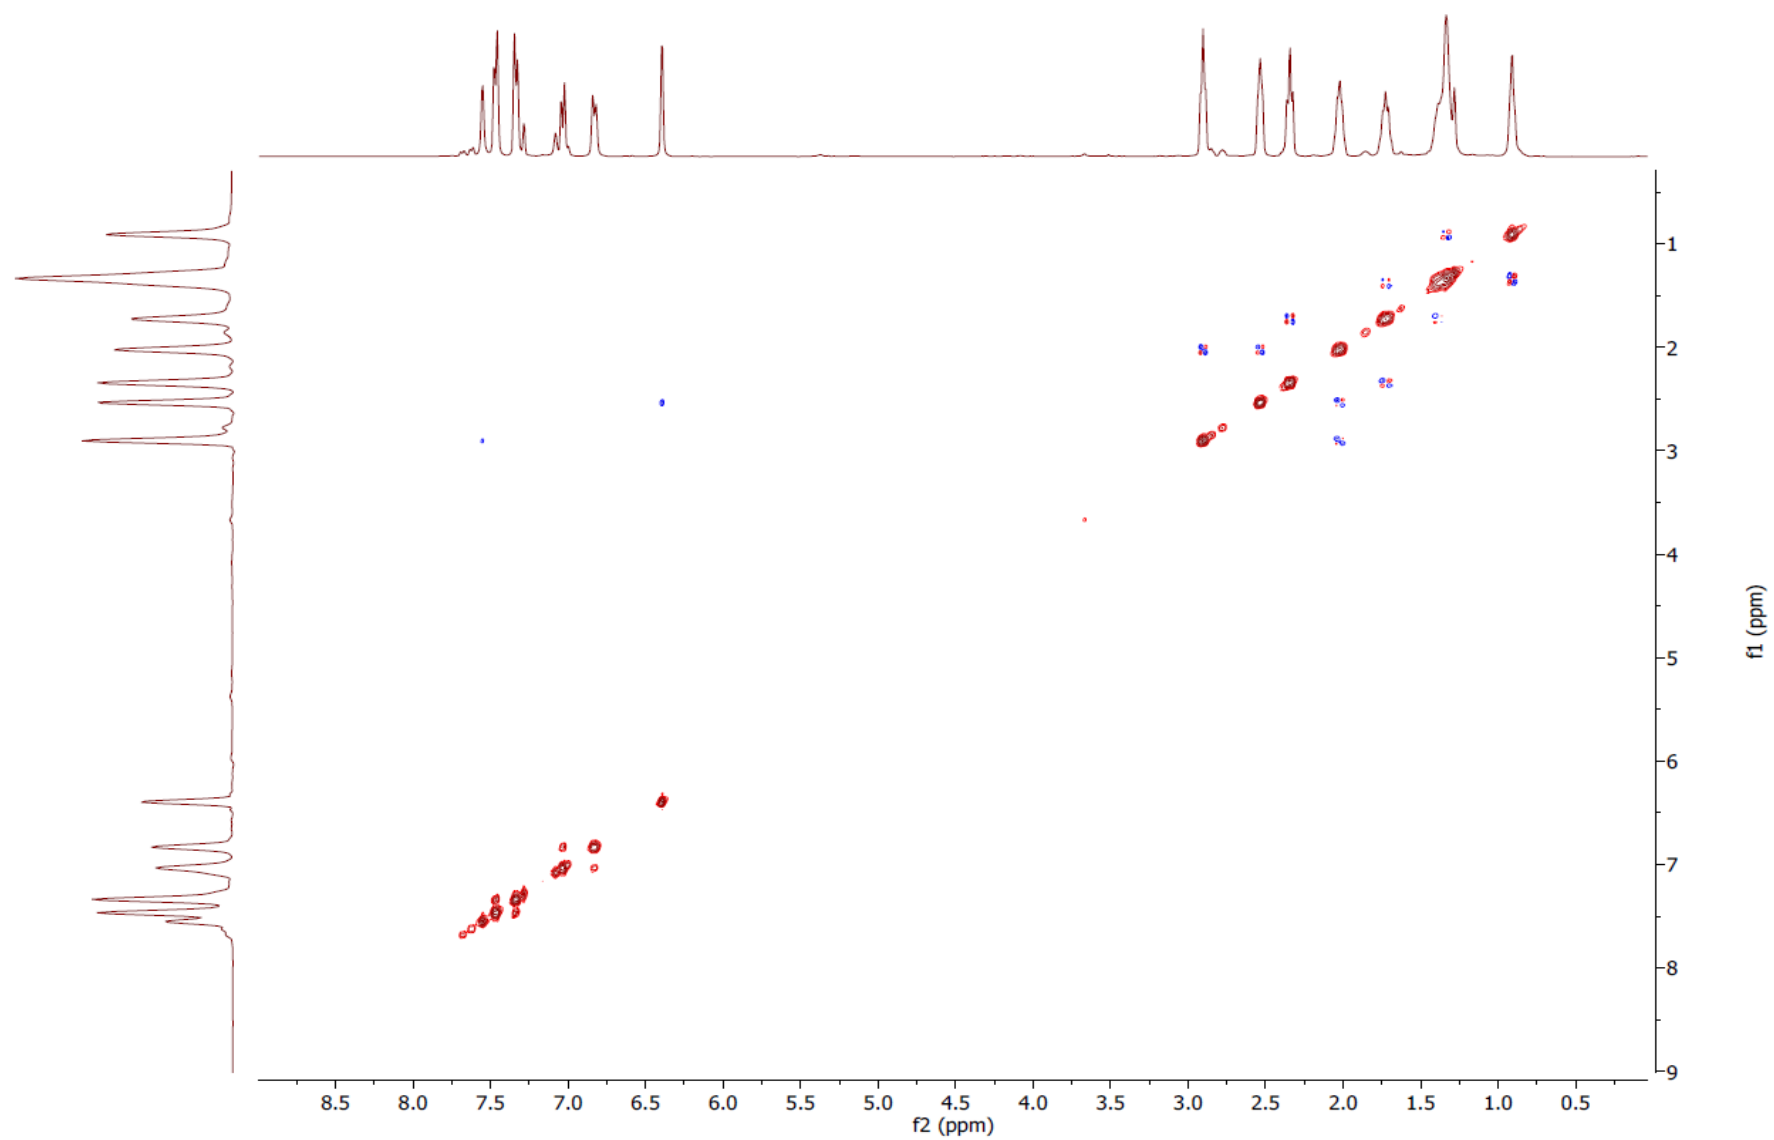

ROESY NMR spectra of compound **33a**

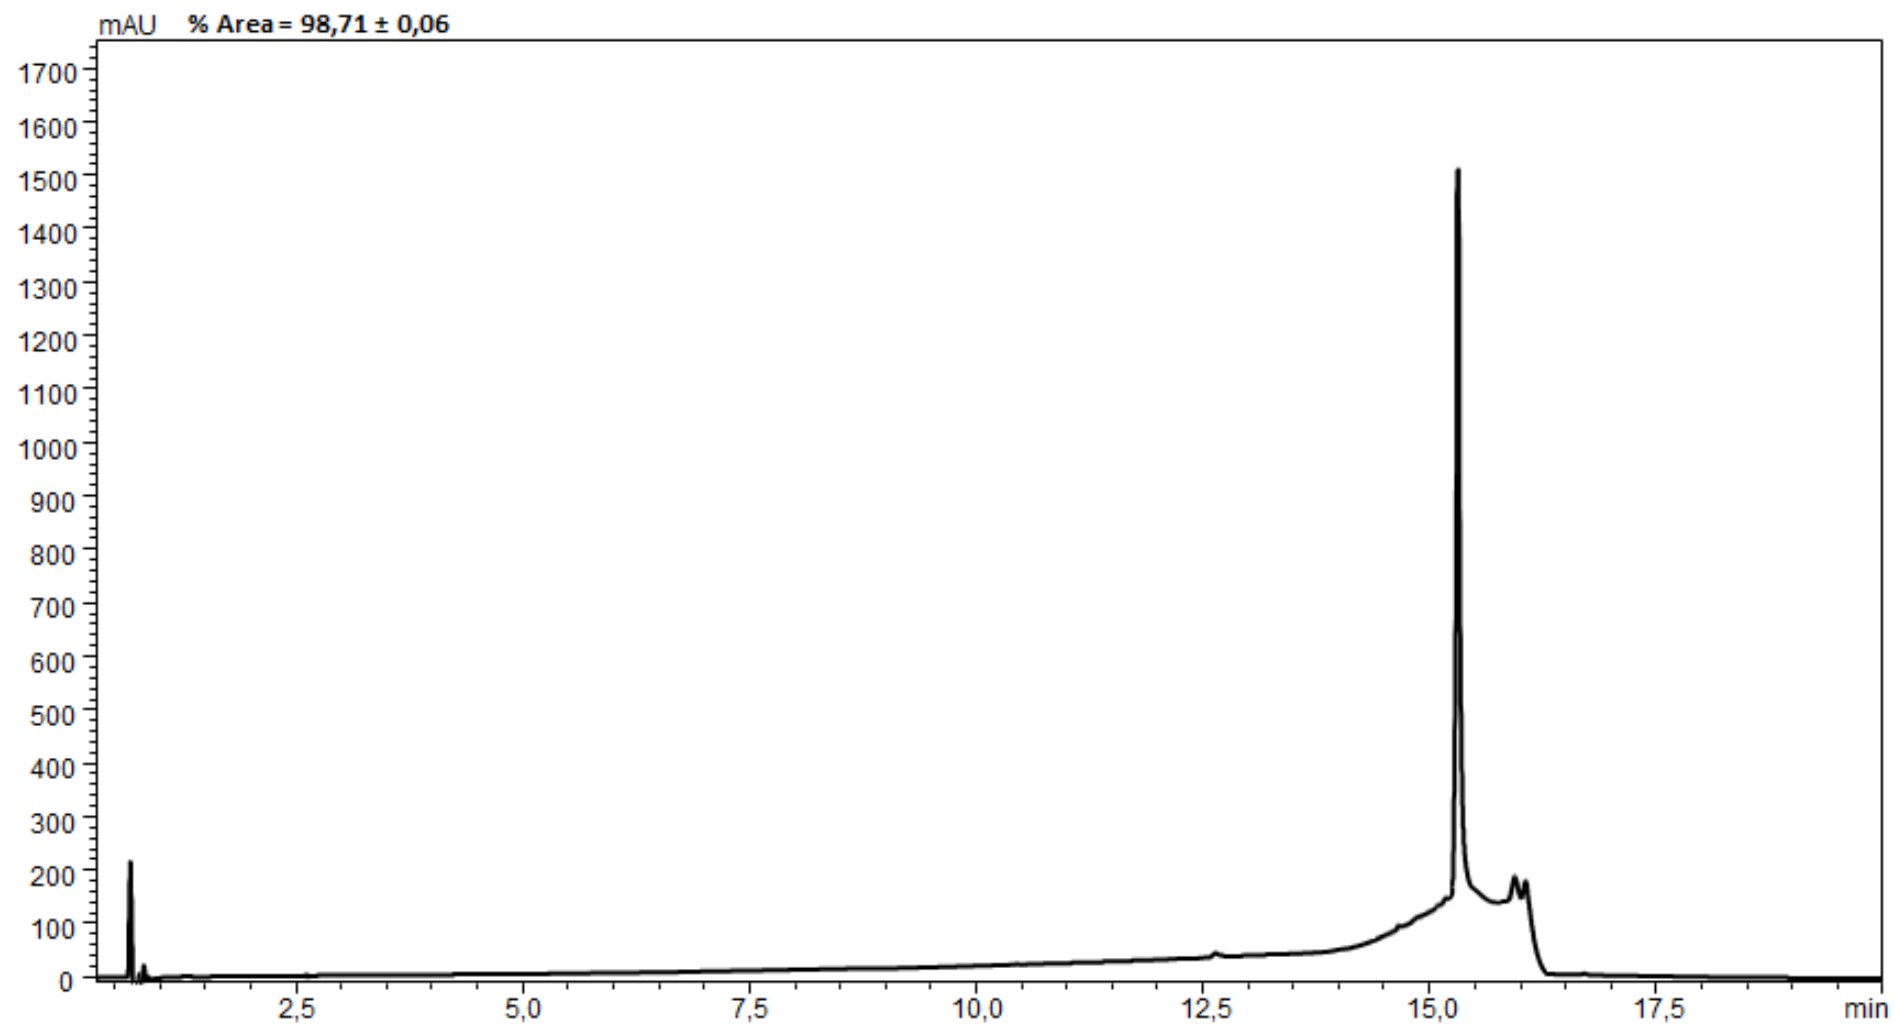

RP-HPLC trace of compound **33a**

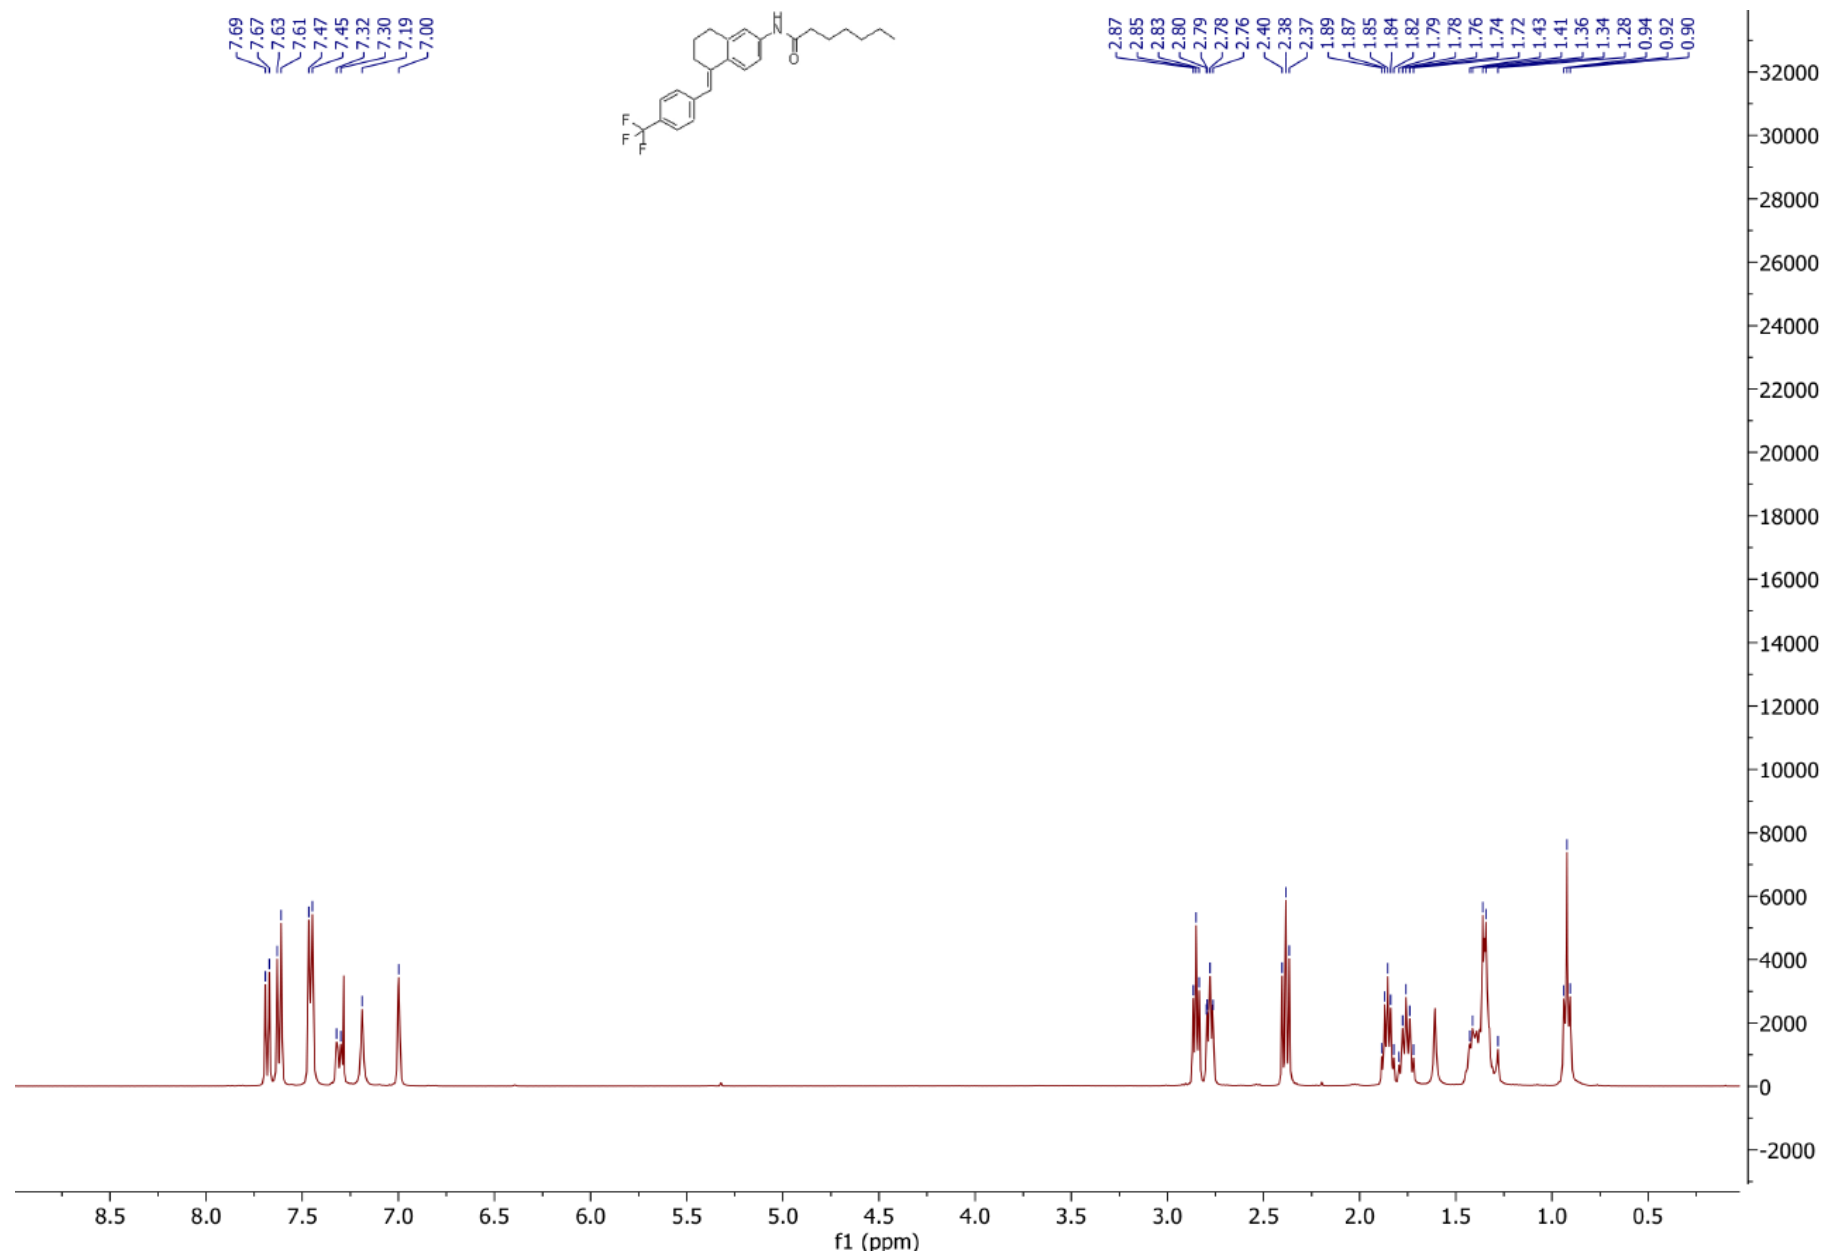

<sup>1</sup>H NMR of compound **33b**

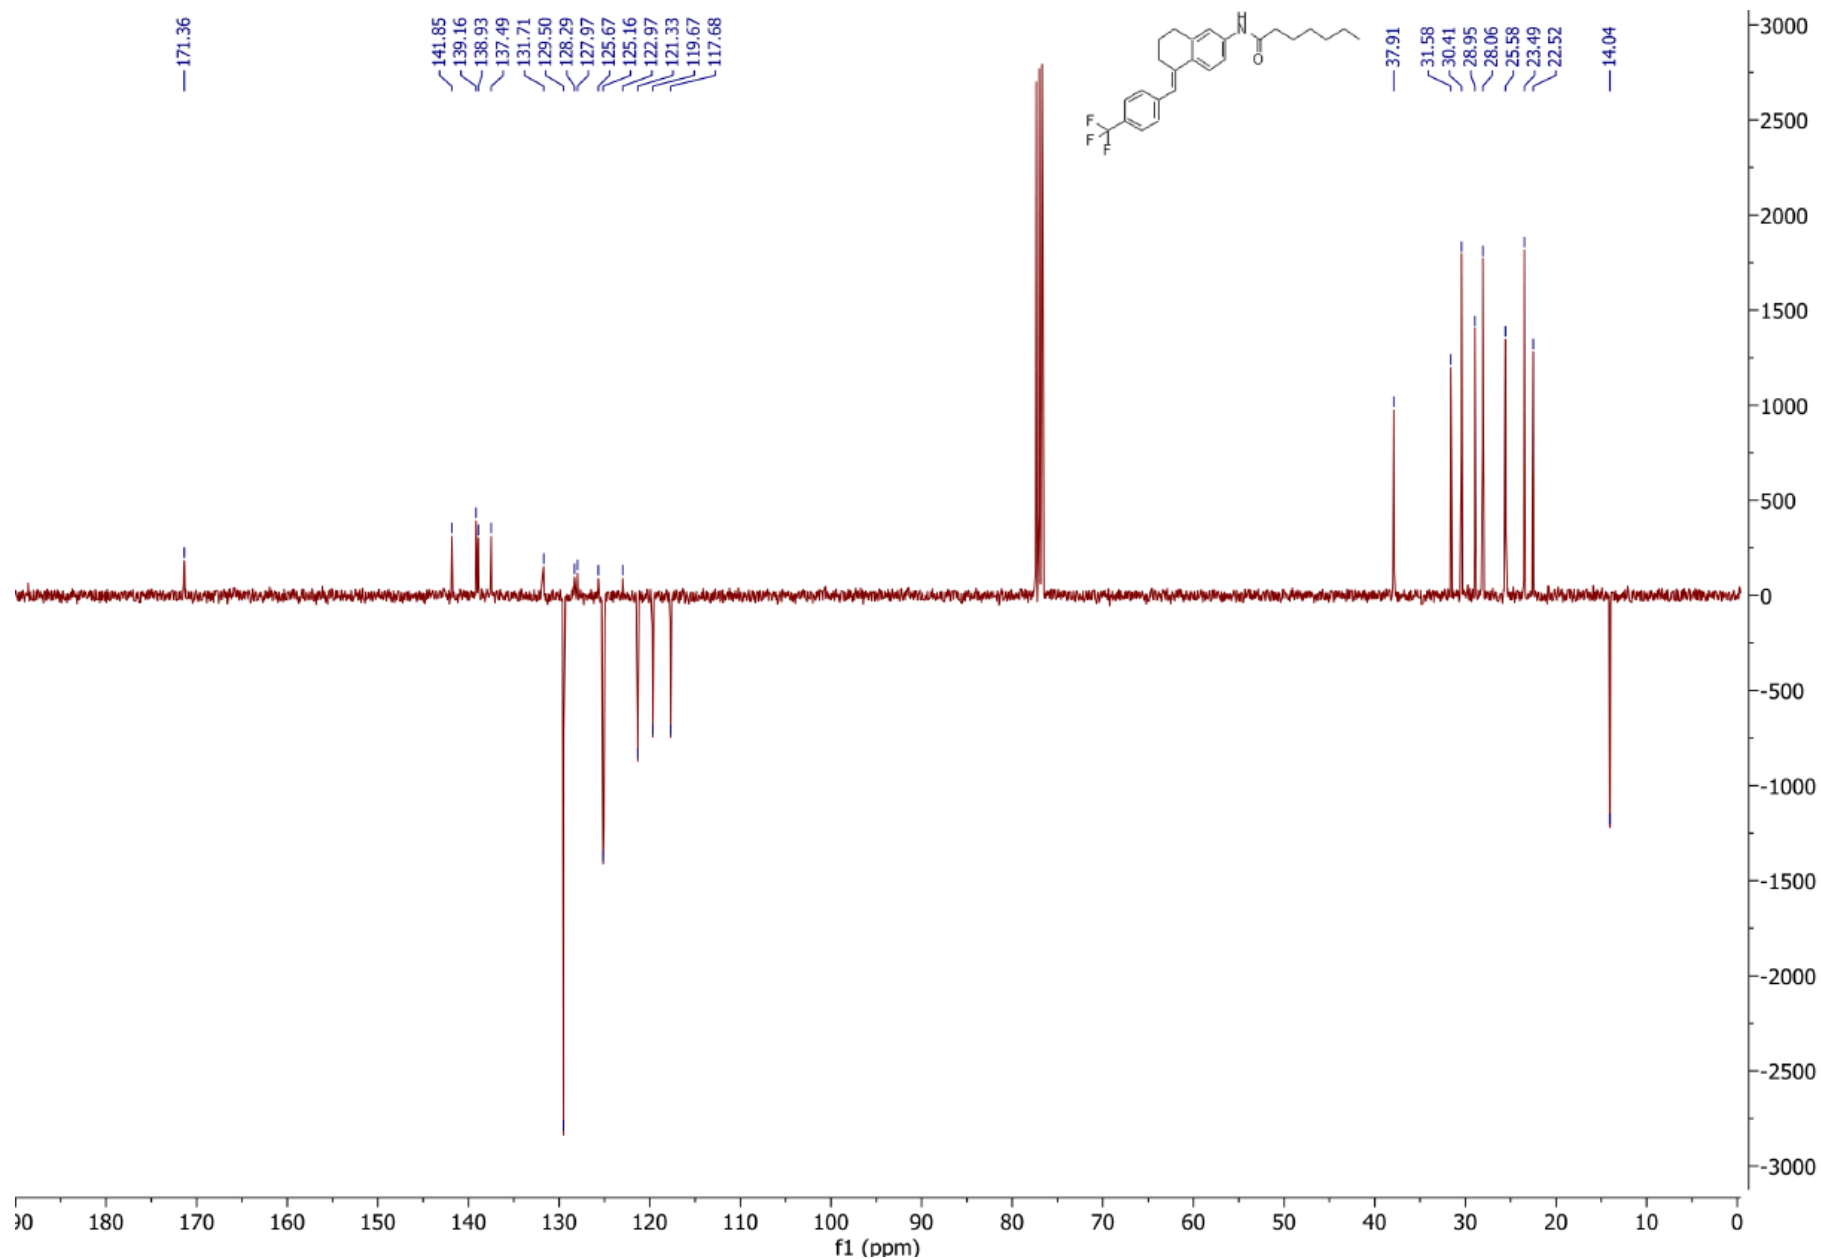

qDEPT NMR of compound **33b**

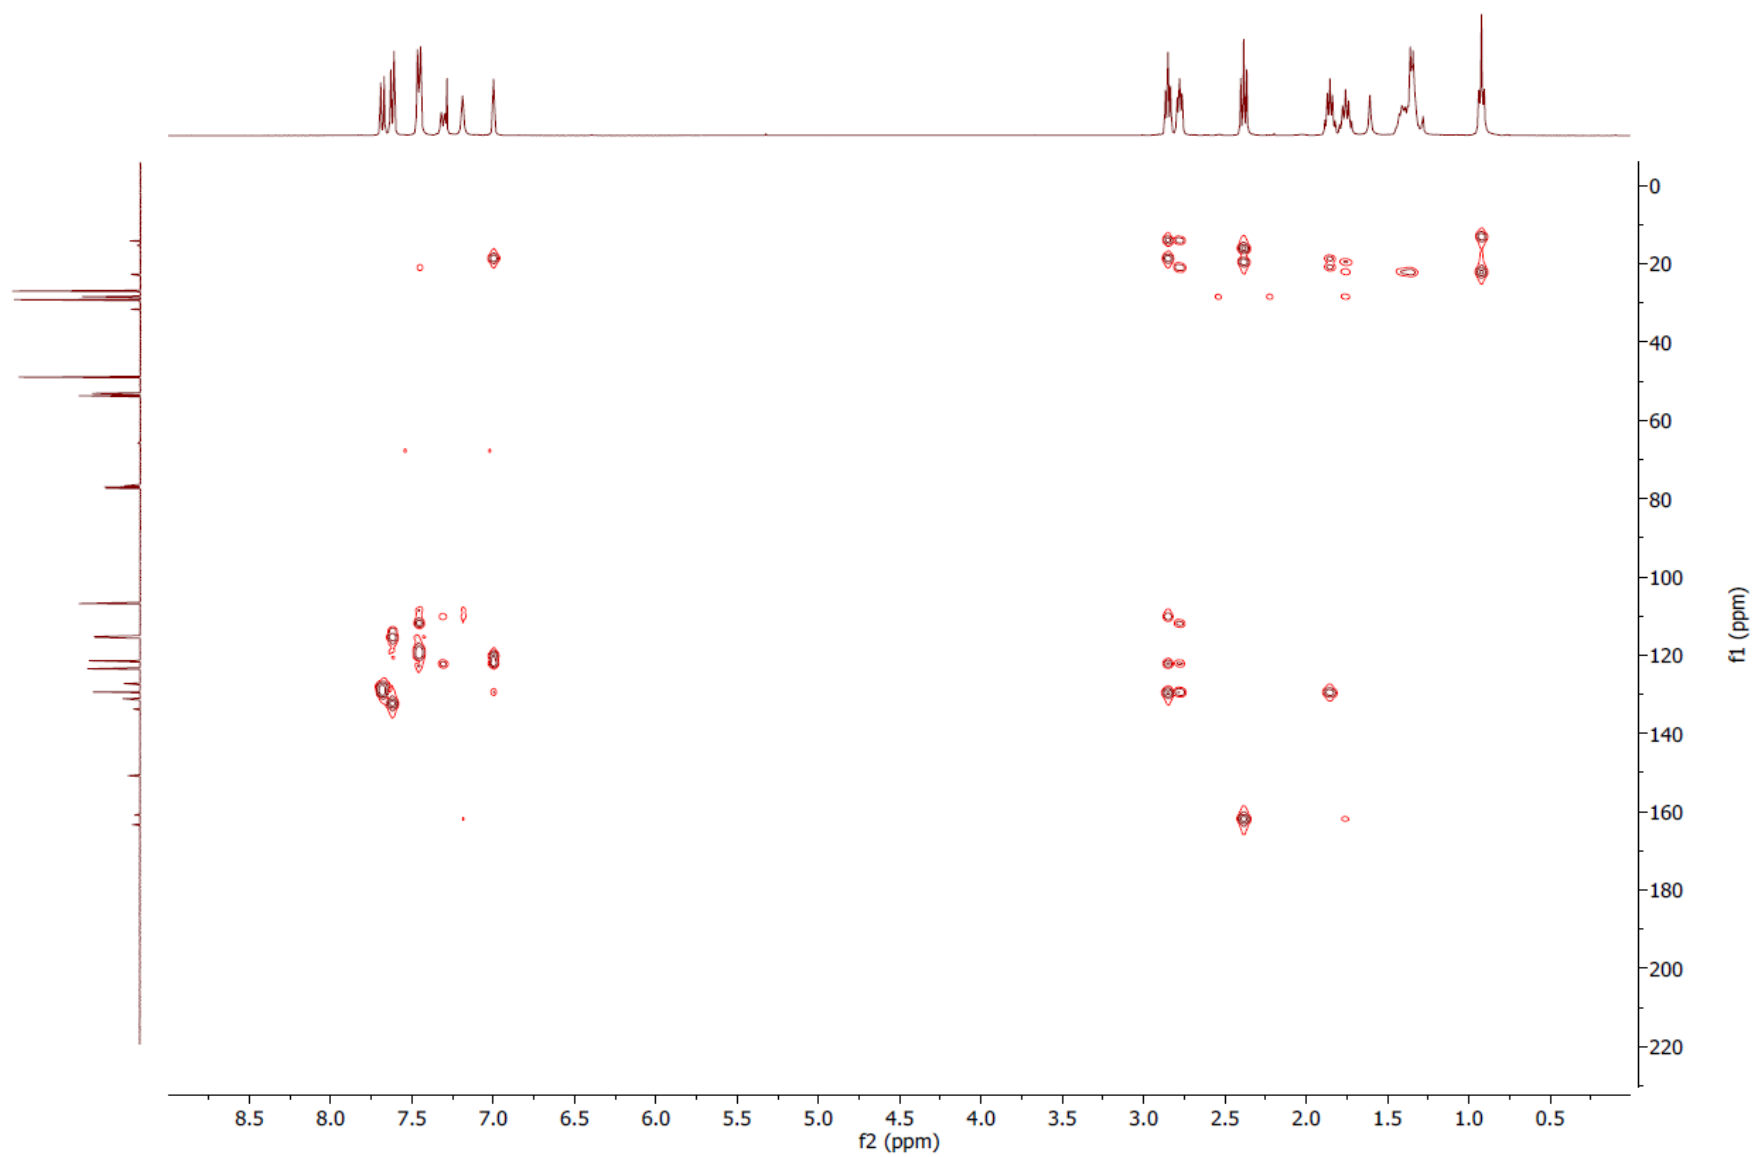

HMBC NMR spectra of compound **33b**

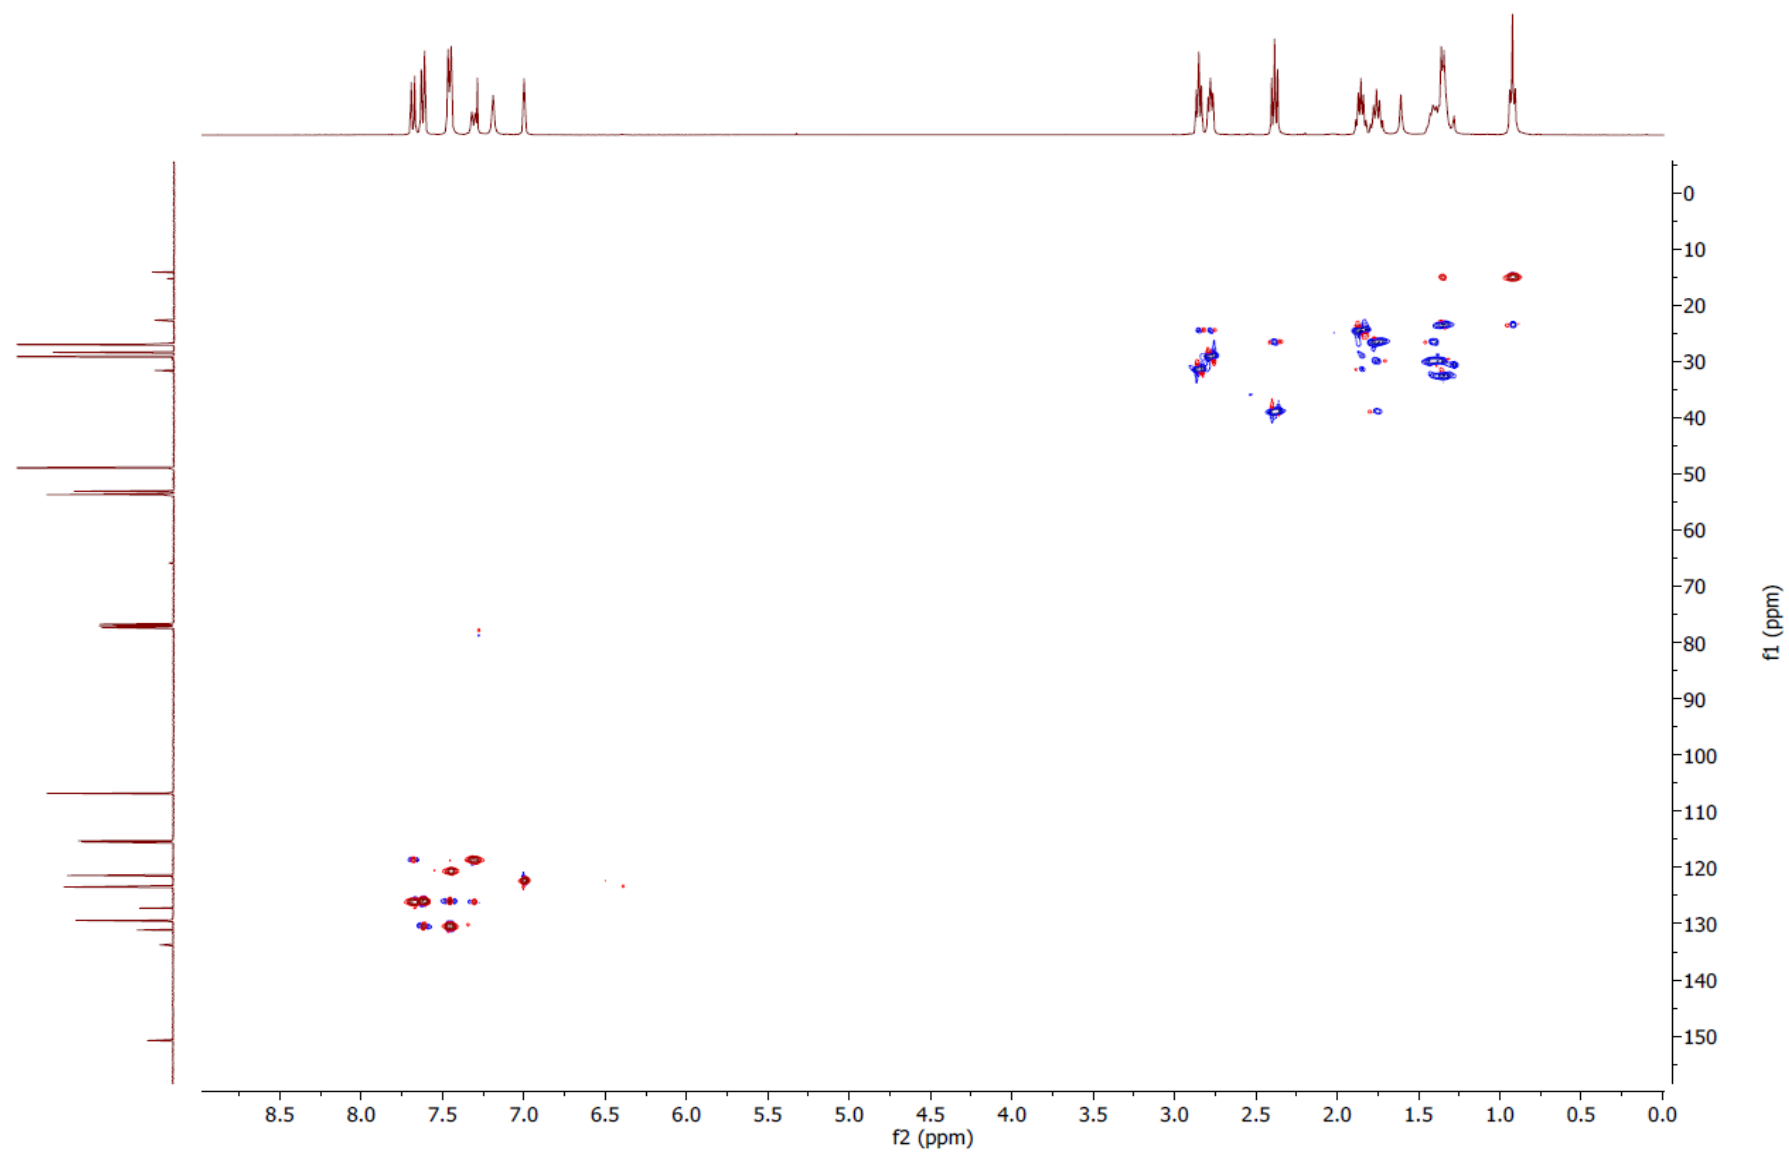

HMQC NMR spectra of compound **33b**

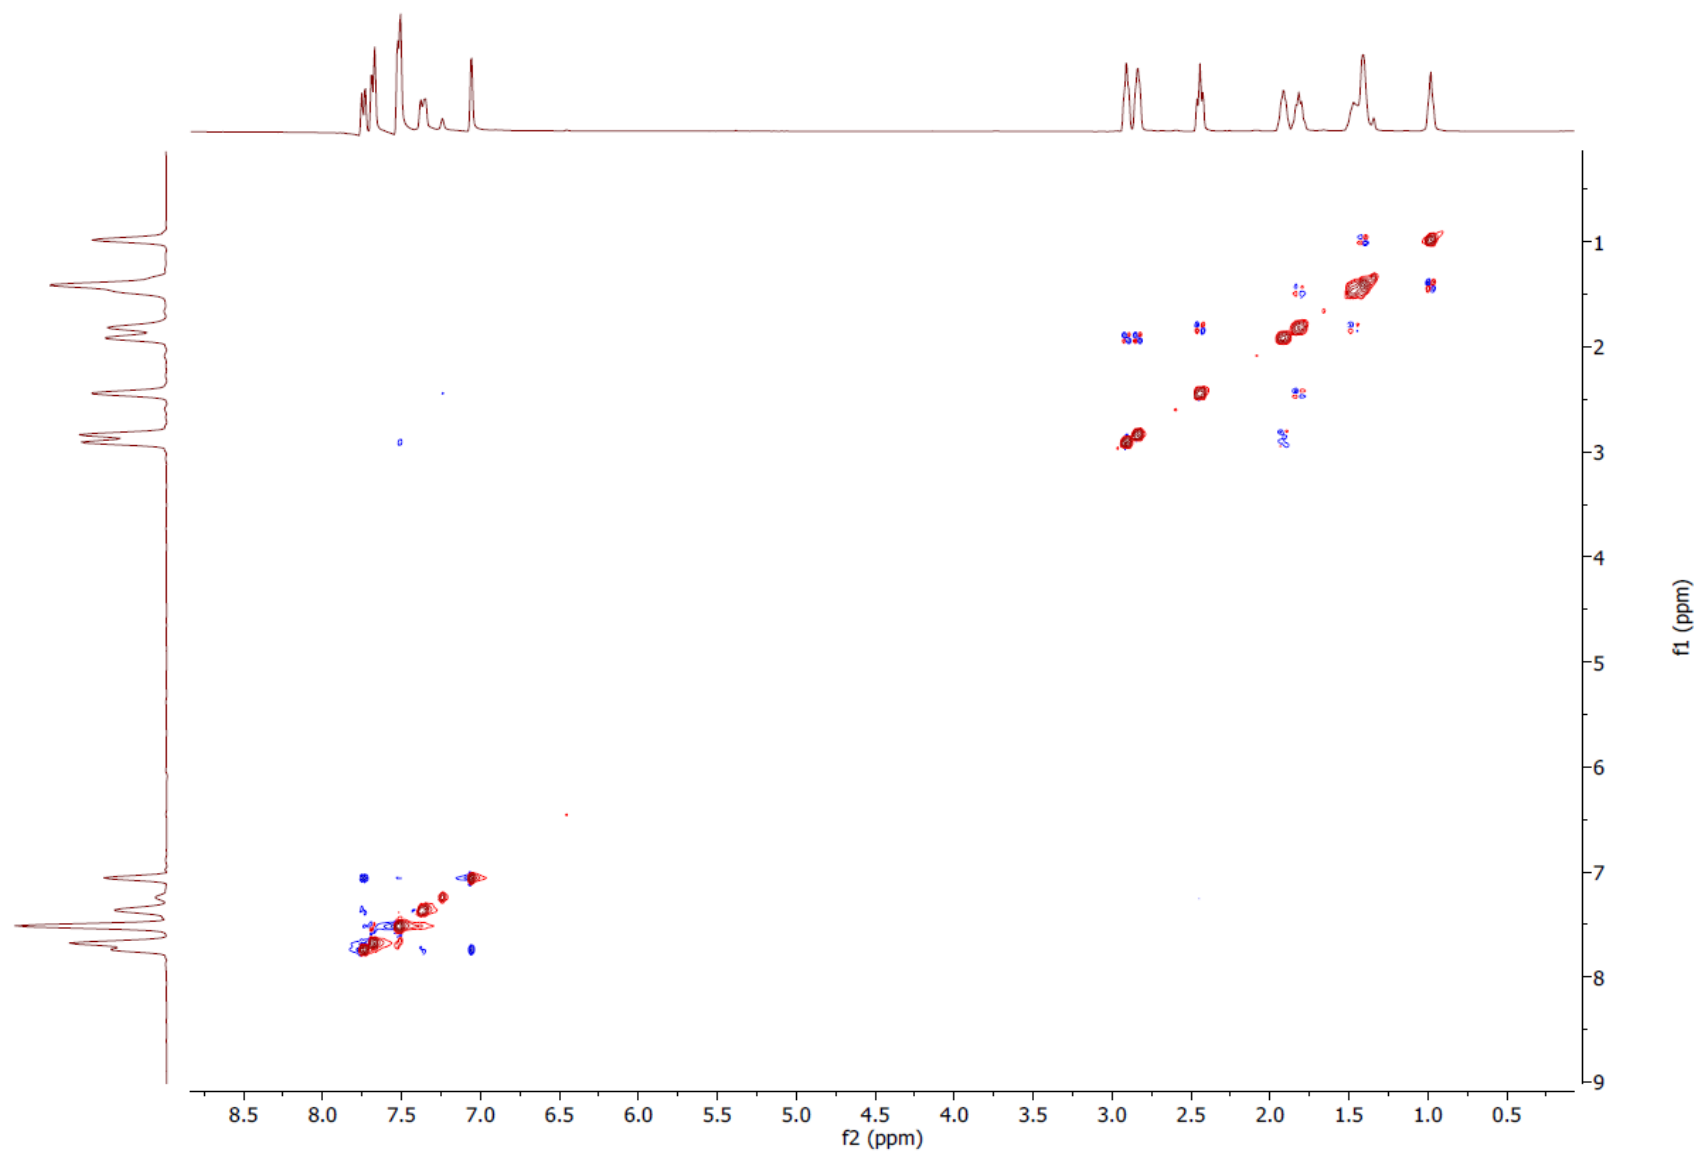

ROESY NMR spectra of compound **33b**



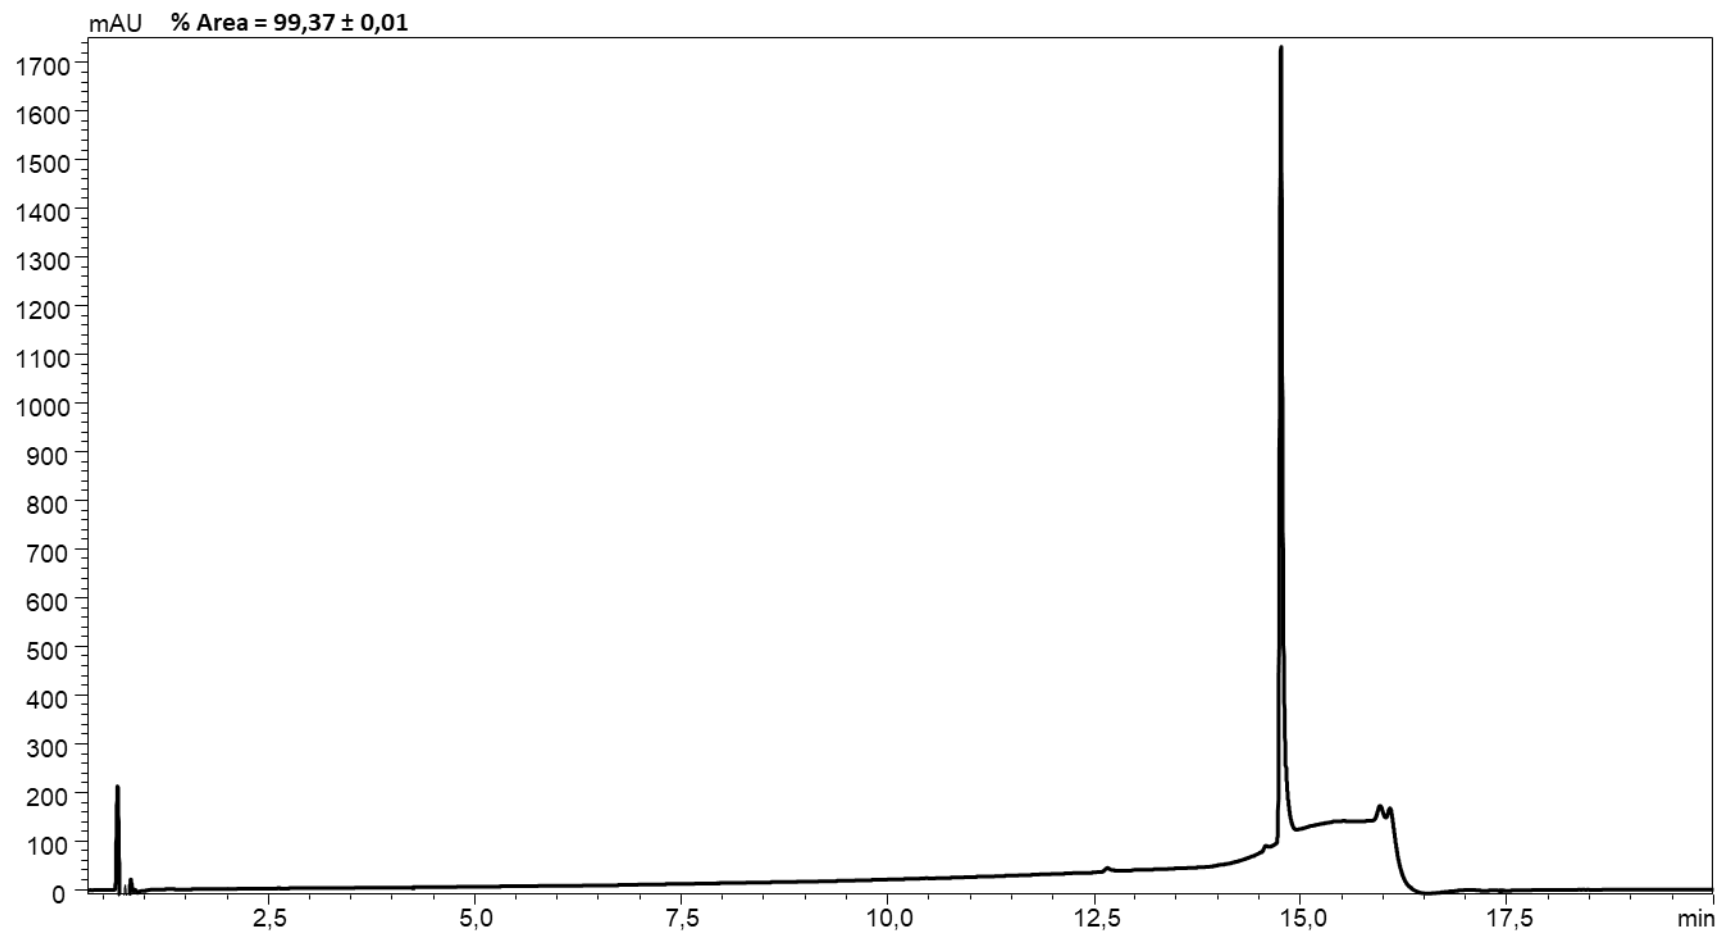

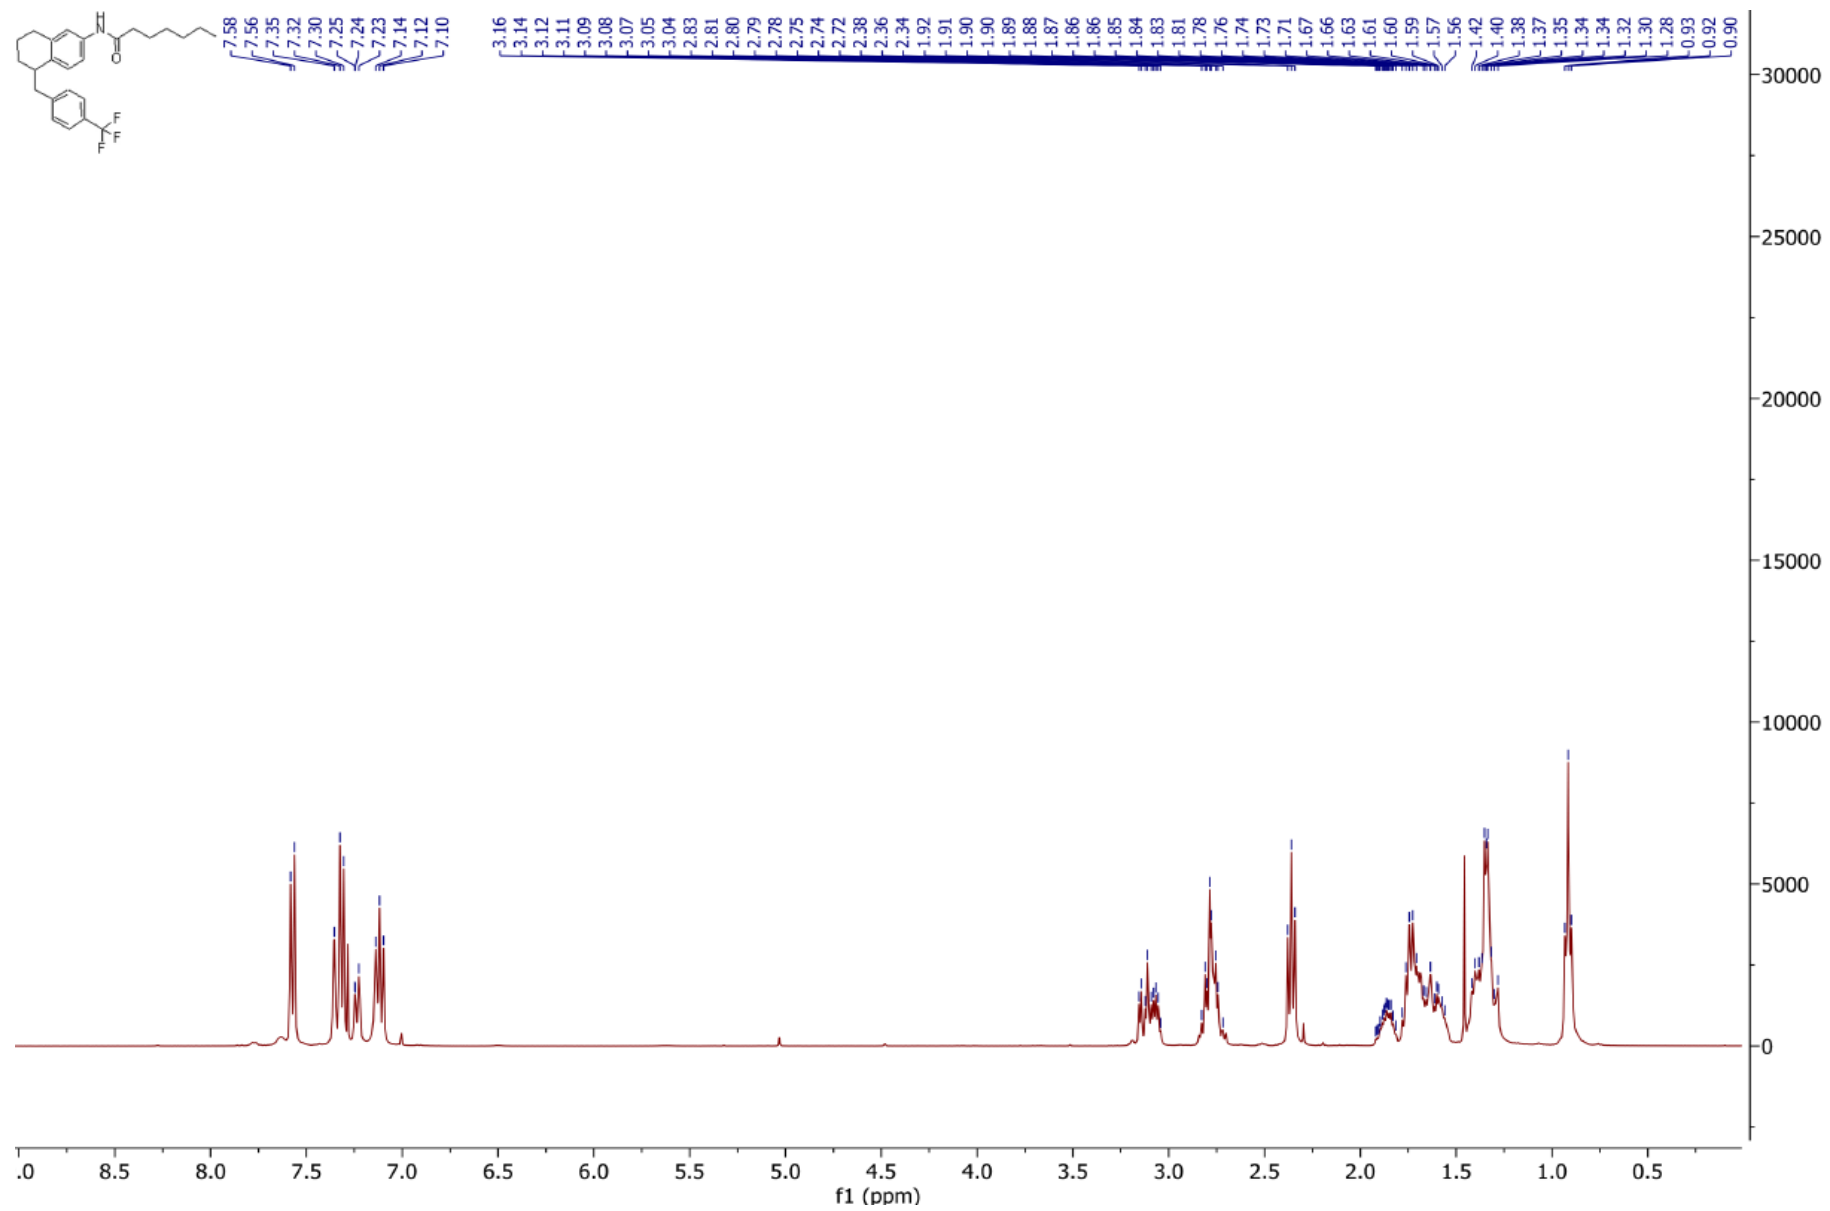

<sup>1</sup>H NMR of compound 34

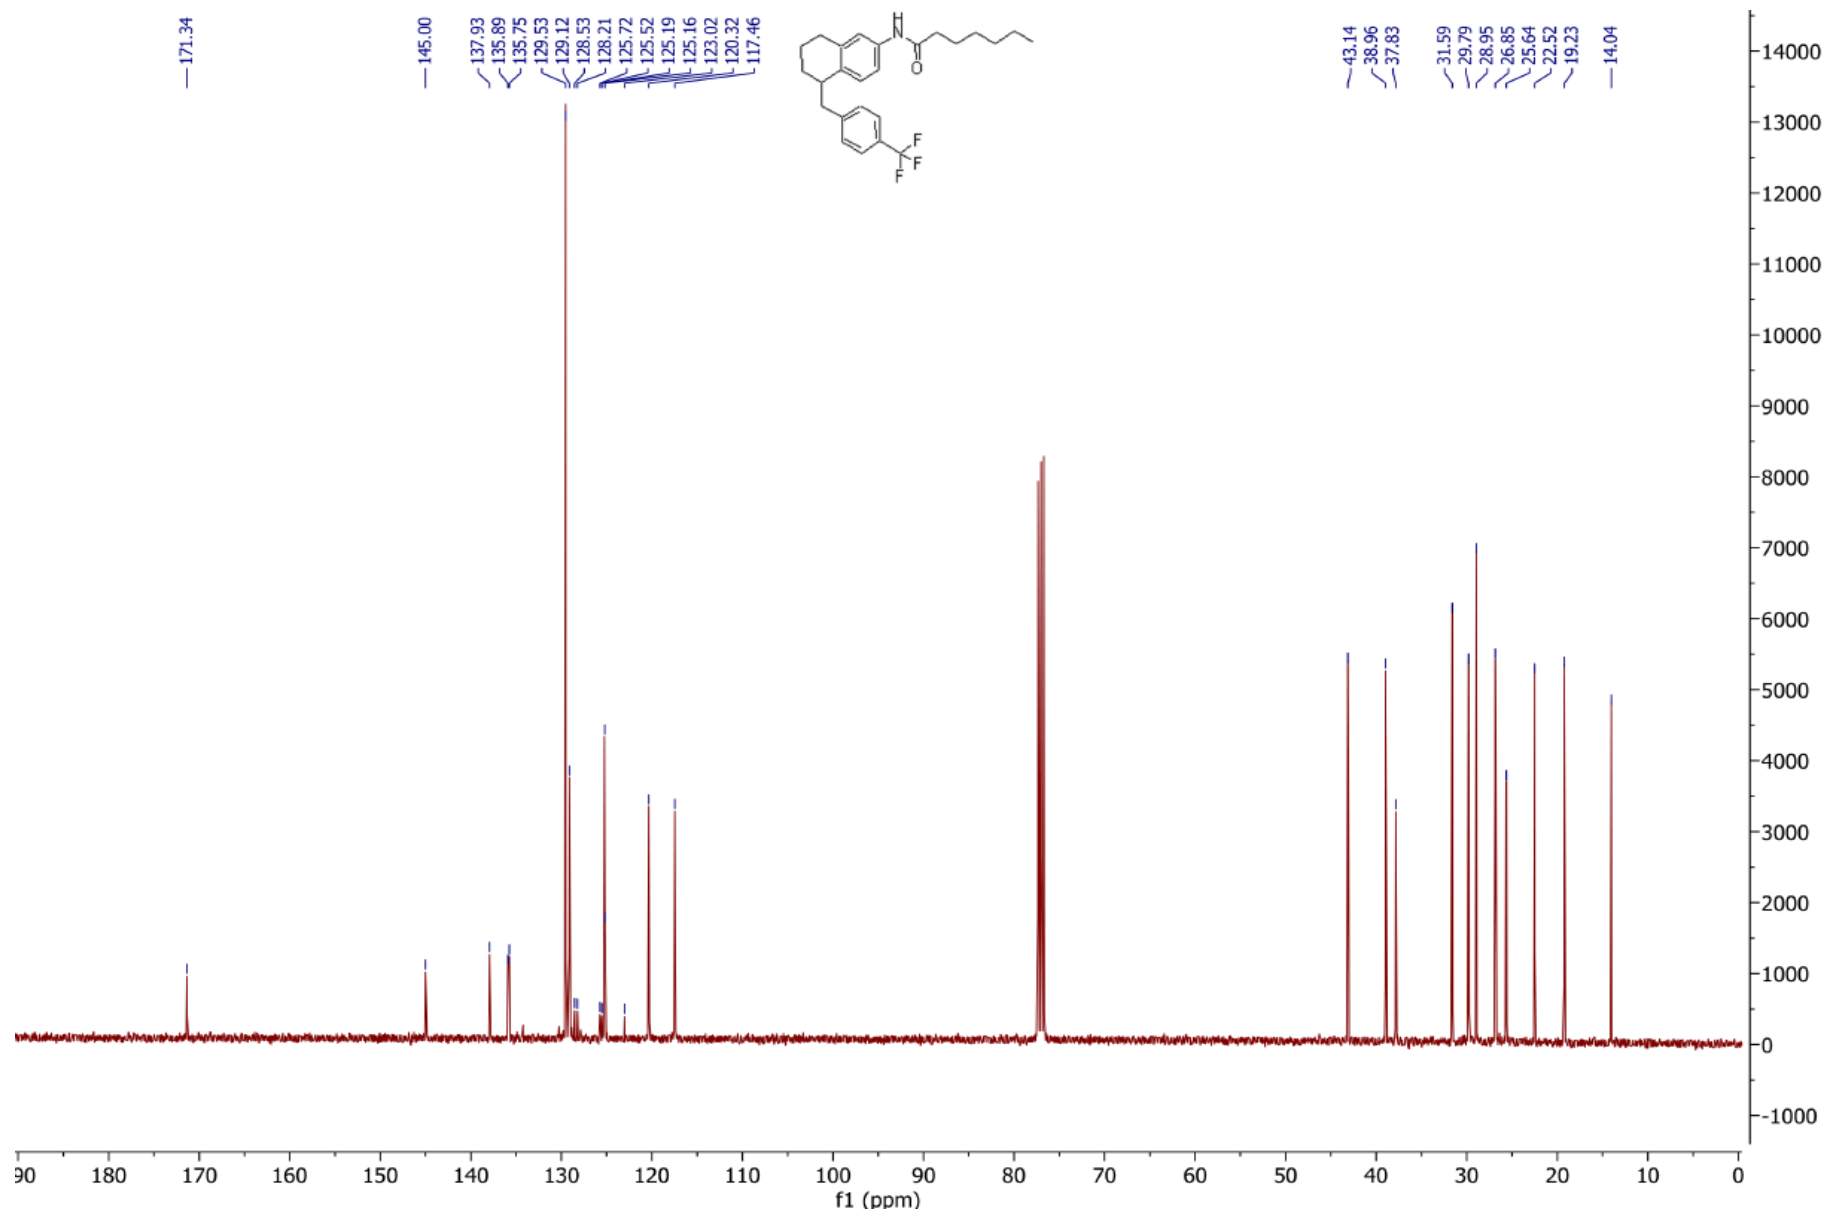

<sup>13</sup>C NMR of compound **34**

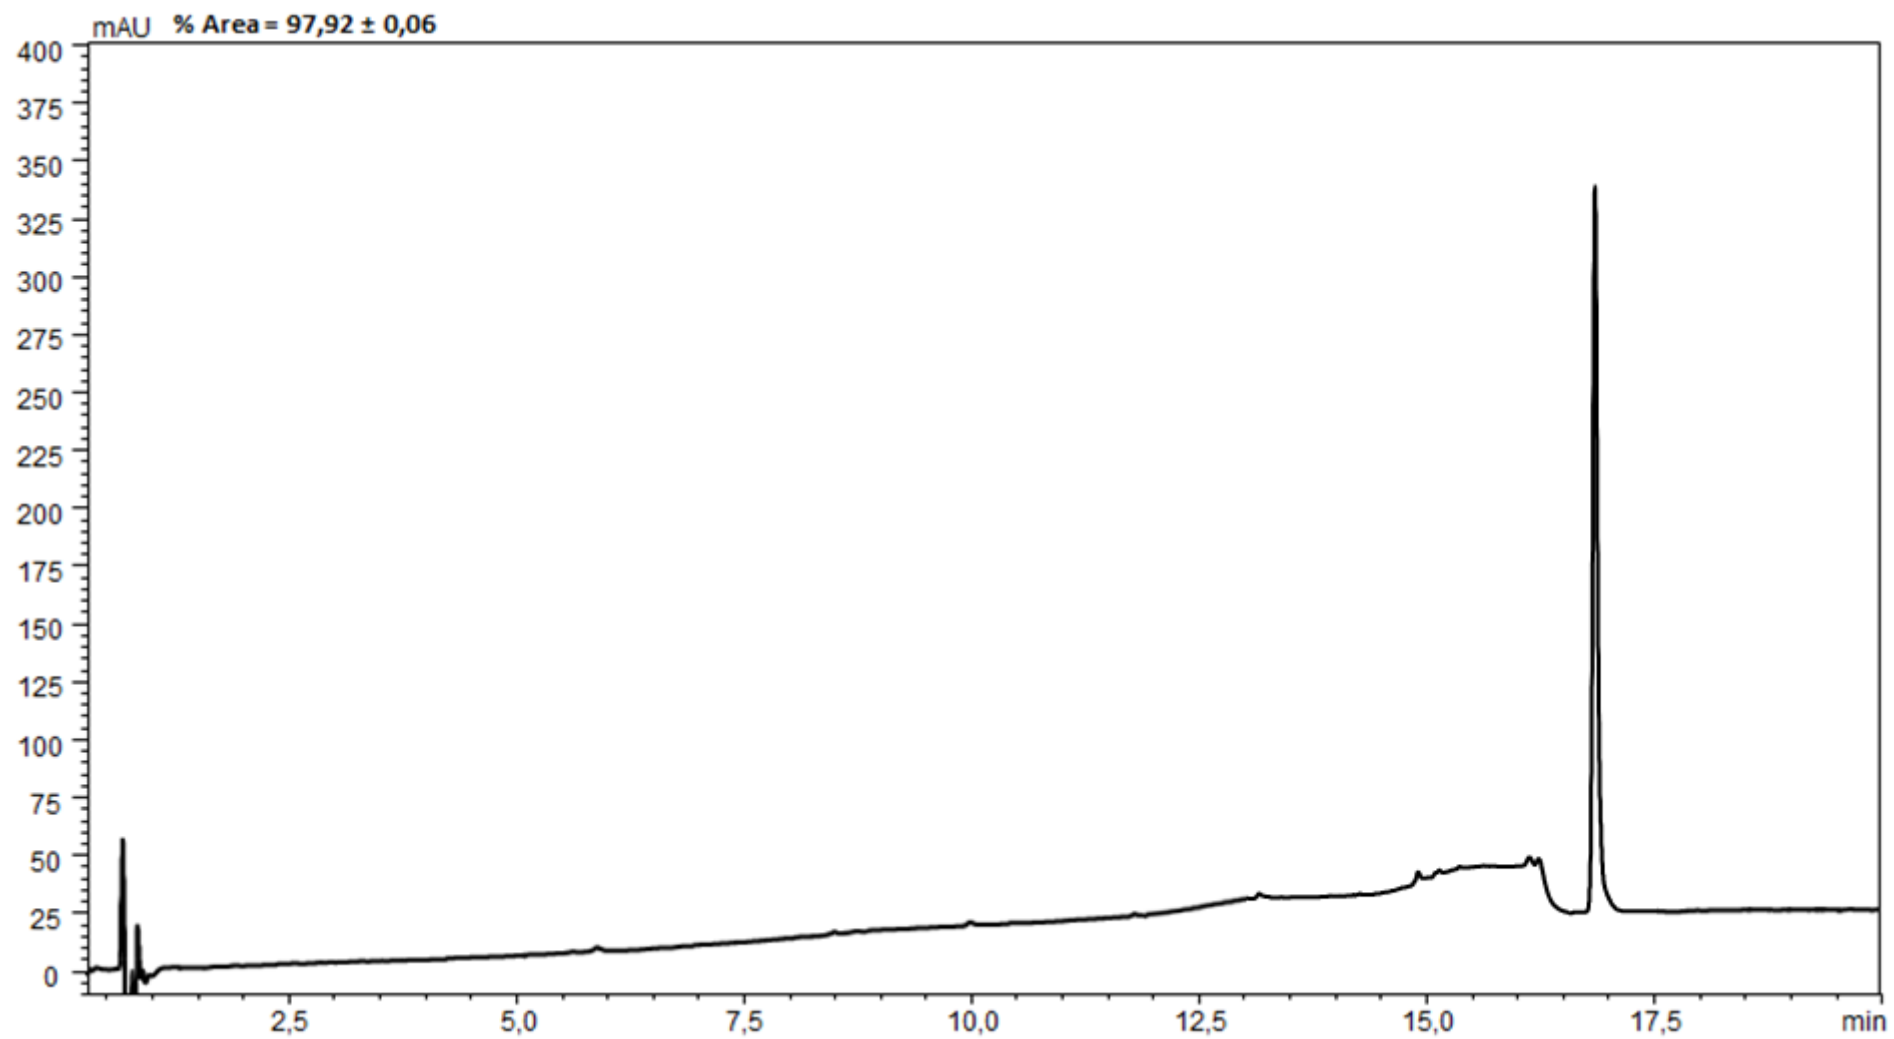

RP-HPLC trace of compound **34**
